# Supplementary material for: Inferring Gene Regulatory Networks from a Population of Yeast Segregants
Source: PubMed Central journal article supplement (PMC6361976; doi:10.1038/s41598-018-37667-4), 2019-02-04
Supplement: 41598_2018_37667_MOESM1_ESM.pdf [file 41598_2018_37667_MOESM1_ESM.pdf]

## Supplementary Information

### Inferring Gene Regulatory Networks from a Population of Yeast Segregants

Chen Chen<sup>1</sup>, Dabao Zhang<sup>1,3,\*</sup>, Tony R. Hazbun<sup>2,3,\*</sup> and Min Zhang<sup>1,3,\*</sup>

<sup>1</sup>Department of Statistics, Purdue University, West Lafayette, IN 47907

<sup>2</sup>Department of Medicinal Chemistry and Molecular Pharmacology, Purdue University, West Lafayette, IN 47907

<sup>3</sup>Purdue University Center for Cancer Research, Purdue University, West Lafayette, IN 47907

\*Correspondence and requests for materials should be addressed to Dabao Zhang (email: [zhangdb@purdue.edu](mailto:zhangdb@purdue.edu)), Tony Hazbun (email: [thazbun@purdue.edu](mailto:thazbun@purdue.edu)) or Min Zhang (email: [minzhang@purdue.edu](mailto:minzhang@purdue.edu))

Table S1: List of cis eQTLs identified for each gene.

Table S2: List of all pairwise connections and bootstrap frequency and corresponding coefficients.

Table S3: List of subnetwork nodes.

Table S4: Gene ontology enrichment results using DAVID analysis of subnetworks.

Table S5: Results of YeastMine analysis of subnetwork 1.

Table S6: Gene expression values of RM and BY strains for genes in the phosphocholine network and statistical analysis.

Table S7: Identification of transcription factors controlling subnetworks using YEASTRACT.

**Table S1: List of cis eQTLs identified for each gene.**

| ORF Name  | Gene Name | Marker ID     | p-Value  |
|-----------|-----------|---------------|----------|
| YCL018W   | LEU2      | 6909_at_x05   | 2.00E-72 |
| YLR155C   | ASP3-1    | 9825_s_at_x15 | 1.79E-70 |
| YEL021W   | URA3      | 5724_at_x04   | 5.30E-62 |
| YDL227C   | Ho        | 6725_at_x14   | 1.69E-55 |
| YDR038C   | ENA5      | 6453_at_x14   | 1.42E-47 |
| YBR132C   | AGP2      | 7223_at_x06   | 1.60E-42 |
| YAR028W   | YAR028W   | 11290_at_x00  | 2.04E-37 |
| YOL164W   | BDS1      | 8717_at_x06   | 3.76E-34 |
| YHR043C   | DOG2      | 4472_s_at_x03 | 5.65E-32 |
| YCR041W   | YCR041W   | 6829_at_x02   | 8.05E-30 |
| YOL104C   | NDJ1      | 8639_at_x04   | 1.86E-29 |
| YGL169W   | SUA5      | 5166_at_x10   | 5.85E-28 |
| YGL201C   | MCM6      | 5224_at_x14   | 6.73E-28 |
| YOL089C   | HAL9      | 8654_at_x07   | 3.82E-26 |
| YAR027W   | UIP3      | 11289_at_x14  | 2.06E-24 |
| YGL053W   | PRM8      | 5054_at_x12   | 9.96E-22 |
| YNL035C   | YNL035C   | 8906_at_x10   | 1.62E-21 |
| YIL089W   | YIL089W   | 4177_at_x12   | 8.74E-21 |
| YDR441C   | APT2      | 6048_at_x08   | 9.71E-21 |
| YDR367W   | KEI1      | 6109_at_x15   | 3.66E-20 |
| YPL016W   | SWI1      | 2565_s_at_x02 | 6.99E-20 |
| YAL056W   | GPB2      | 11392_at_x03  | 8.10E-20 |
| YOR131C   | YOR131C   | 8423_at_x05   | 7.10E-17 |
| YOL113W   | SKM1      | 8675_at_x14   | 7.59E-16 |
| YLR052W   | IES3      | 10261_at_x14  | 2.95E-15 |
| YDR134C   | YDR134C   | 6323_at_x15   | 2.99E-15 |
| YJL217W   | REE1      | 11255_at_x07  | 3.41E-15 |
| YML016C   | PPZ1      | 9648_at_x04   | 3.53E-15 |
| YDL217C   | TIM22     | 6691_at_x12   | 4.30E-15 |
| YLR464W   | YLR464W   | 9866_i_at_x02 | 4.11E-14 |
| YLR330W   | CHS5      | 9809_at_x14   | 7.49E-14 |
| YBR069C   | TAT1      | 6980_at_x13   | 1.19E-13 |
| YOL043C   | NTG2      | 8609_at_x00   | 4.33E-13 |
| YIL015C-A | YIL015C-A | 4110_at_x13   | 6.13E-13 |
| YBR274W   | CHK1      | 7092_at_x08   | 6.46E-13 |
| YML079W   | YML079W   | 9720_at_x13   | 1.48E-12 |
| YNL329C   | PEX6      | 9201_at_x04   | 2.16E-12 |
| YOL094C   | RFC4      | 8649_at_x15   | 2.54E-12 |
| YOR051C   | ETT1      | 8523_at_x04   | 3.90E-12 |
| YMR152W   | YIM1      | 9506_at_x13   | 6.47E-12 |
| YBR067C   | TIP1      | 7290_at_x01   | 8.55E-12 |
| YGL193C   | YGL193C   | 5186_at_x12   | 8.57E-12 |
| YGL207W   | SPT16     | 5218_at_x13   | 1.65E-11 |

|           |         |               |          |
|-----------|---------|---------------|----------|
| YDL132W   | CDC53   | 6596_at_x01   | 1.86E-11 |
| YKR080W   | MTD1    | 10505_at_x01  | 2.95E-11 |
| YHR115C   | DMA1    | 4408_at_x08   | 3.33E-11 |
| YNL041C   | COG6    | 8900_at_x08   | 4.94E-11 |
| YFL056C   | AAD6    | 5424_at_x00   | 5.49E-11 |
| YBR166C   | TYR1    | 7213_at_x01   | 9.40E-11 |
| YPR022C   | SDD4    | 7729_at_x12   | 2.30E-10 |
| YIL166C   | YIL166C | 4285_at_x06   | 3.13E-10 |
| YJL030W   | MAD2    | 11037_at_x13  | 3.40E-10 |
| YOL092W   | YPQ1    | 8651_at_x00   | 3.56E-10 |
| YJL171C   | TOH1    | 11212_at_x03  | 6.40E-10 |
| YJL154C   | VPS35   | 11184_at_x10  | 8.75E-10 |
| YGL208W   | SIP2    | 5217_at_x03   | 9.46E-10 |
| YLR342W   | FKS1    | 2837_s_at_x01 | 2.48E-09 |
| YIL046W   | MET30   | 4047_at_x02   | 2.55E-09 |
| YLR389C   | STE23   | 9924_at_x07   | 2.85E-09 |
| YDR339C   | FCF1    | 5870_at_x14   | 4.23E-09 |
| YGL025C   | PGD1    | 5038_at_x05   | 4.61E-09 |
| YGR158C   | MTR3    | 4859_at_x13   | 4.69E-09 |
| YKL160W   | ELF1    | 10759_at_x07  | 4.92E-09 |
| YJR032W   | CPR7    | 11007_at_x11  | 6.94E-09 |
| YLR231C   | BNA5    | 10079_at_x10  | 8.13E-09 |
| YHL048W   | COS8    | 3188_at_x15   | 8.75E-09 |
| YCR083W   | TRX3    | 6822_at_x02   | 9.69E-09 |
| YIL111W   | COX5b   | 4027_at_x14   | 2.57E-08 |
| YGL051W   | MST27   | 5055_at_x08   | 2.70E-08 |
| YAL051W   | OAF1    | 11358_at_x01  | 2.71E-08 |
| YER026C   | CHO1    | 5681_at_x09   | 4.52E-08 |
| YDL180W   | YDL180W | 6685_at_x14   | 5.96E-08 |
| YGL035C   | MIG1    | 5027_at_x05   | 6.48E-08 |
| YDR034C   | LYS14   | 6448_at_x14   | 6.92E-08 |
| YIL061C   | SNP1    | 4156_at_x06   | 8.63E-08 |
| YLR206W   | ENT2    | 10144_at_x01  | 8.67E-08 |
| YJR084W   | YJR084W | 10923_at_x14  | 1.71E-07 |
| YCL026C-A | FRM2    | 6906_at_x06   | 2.80E-07 |
| YGR012W   | MCY1    | 4985_at_x15   | 3.91E-07 |
| YBR163W   | EXO5    | 7210_at_x08   | 4.37E-07 |
| YJL036W   | SNX4    | 11077_at_x11  | 5.38E-07 |
| YML004C   | GLO1    | 9665_at_x15   | 5.46E-07 |
| YJR074W   | MOG1    | 10958_at_x13  | 5.83E-07 |
| YBL040C   | ERD2    | 7412_at_x14   | 6.03E-07 |
| YKL096W   | CWP1    | 10463_at_x00  | 6.10E-07 |
| YGL017W   | ATE1    | 5045_at_x01   | 6.76E-07 |
| YJR056C   | YJR056C | 10985_at_x02  | 6.82E-07 |
| YPL064C   | CWC27   | 7825_at_x01   | 7.83E-07 |
| YDR144C   | MKC7    | 6335_at_x09   | 9.82E-07 |
| YDL089W   | NUR1    | 6552_at_x04   | 9.99E-07 |

|           |         |               |          |
|-----------|---------|---------------|----------|
| YGR023W   | MTL1    | 4996_at_x03   | 1.06E-06 |
| YLL028W   | TPO1    | 10358_at_x06  | 1.13E-06 |
| YLR430W   | SEN1    | 2867_s_at_x00 | 1.18E-06 |
| YML098W   | TAF13   | 9746_at_x10   | 1.18E-06 |
| YPL144W   | POC4    | 7881_at_x04   | 1.43E-06 |
| YGR152C   | RSR1    | 4853_at_x00   | 1.68E-06 |
| YLR046C   | YLR046C | 10298_at_x05  | 1.78E-06 |
| YJL140W   | RPB4    | 11154_at_x15  | 1.80E-06 |
| YER185W   | PUG1    | 5534_at_x02   | 1.85E-06 |
| YJL158C   | CIS3    | 11180_at_x06  | 1.92E-06 |
| YFR037C   | RSC8    | 5336_at_x09   | 2.01E-06 |
| YPL009C   | RQC2    | 7744_at_x08   | 2.02E-06 |
| YMR010W   | ANY1    | 9632_at_x09   | 2.12E-06 |
| YLR455W   | PDP3    | 9859_at_x05   | 2.72E-06 |
| YOR048C   | RAT1    | 8521_at_x07   | 3.03E-06 |
| YKL183W   | LOT5    | 10456_at_x09  | 3.04E-06 |
| YDR531W   | CAB1    | 5955_at_x12   | 3.06E-06 |
| YBR161W   | CSH1    | 7207_at_x04   | 3.07E-06 |
| YDR064W   | RPS13   | 6433_at_x13   | 3.41E-06 |
| YDR524C   | AGE1    | 5925_at_x15   | 3.64E-06 |
| YHR033W   | YHR033W | 4507_at_x13   | 3.66E-06 |
| YLR047C   | FRE8    | 10299_at_x07  | 4.50E-06 |
| YKR051W   | YKR051W | 10523_at_x07  | 5.03E-06 |
| YJL183W   | MNN11   | 11197_at_x12  | 5.04E-06 |
| YKR085C   | MRPL20  | 10464_at_x00  | 5.10E-06 |
| YNL046W   | YNL046W | 8896_at_x09   | 5.78E-06 |
| YJL126W   | NIT2    | 11124_at_x10  | 6.16E-06 |
| YMR112C   | MED11   | 9508_at_x12   | 6.53E-06 |
| YER022W   | SRB4    | 5723_at_x13   | 6.65E-06 |
| YOR088W   | YOR088W | 8469_g_at_x03 | 6.67E-06 |
| YMR115W   | MGR3    | 9511_at_x02   | 6.98E-06 |
| YCL009C   | ILV6    | 6871_at_x02   | 6.98E-06 |
| YJL163C   | YJL163C | 11175_at_x10  | 7.51E-06 |
| YPL233W   | NSL1    | 7971_at_x09   | 8.28E-06 |
| YOR144C   | ELG1    | 8391_at_x07   | 9.94E-06 |
| YKL092C   | BUD2    | 10647_at_x07  | 1.09E-05 |
| YOL153C   | YOL153C | 8727_at_x01   | 1.19E-05 |
| YJR073C   | OPI3    | 10957_at_x00  | 1.22E-05 |
| YIL040W   | APQ12   | 4131_at_x05   | 1.42E-05 |
| YLR172C   | DPH5    | 10152_at_x07  | 1.42E-05 |
| YGL226C-A | OST5    | 5243_at_x06   | 1.47E-05 |
| YLR248W   | RCK2    | 2910_at_x05   | 1.52E-05 |
| YHR034C   | PIH1    | 4508_at_x14   | 1.97E-05 |
| YJL204C   | RCY1    | 11222_at_x06  | 1.98E-05 |
| YER037W   | PHM8    | 5449_at_x11   | 2.13E-05 |
| YNL326C   | PFA3    | 9204_at_x02   | 2.15E-05 |
| YLR375W   | STP3    | 9956_at_x07   | 2.80E-05 |

|         |         |               |          |
|---------|---------|---------------|----------|
| YLR258W | GSY2    | 10060_at_x04  | 3.07E-05 |
| YLL024C | SSA2    | 10362_at_x10  | 3.38E-05 |
| YIL082W | Unknown | 11428_at_x06  | 3.43E-05 |
| YGL226W | MTC3    | 5244_at_x04   | 3.53E-05 |
| YNL034W | YNL034W | 8907_s_at_x03 | 3.76E-05 |
| YBR147W | RTC2    | 7193_at_x10   | 3.89E-05 |
| YDR497C | ITR1    | 5966_at_x12   | 4.38E-05 |
| YLR057W | MNL2    | 10266_at_x05  | 4.38E-05 |
| YIL119C | RPI1    | 4192_at_x12   | 4.54E-05 |
| YBR137W | YBR137W | 7228_at_x11   | 4.56E-05 |
| YBR168W | PEX32   | 7170_at_x13   | 4.69E-05 |
| YOR142W | LSC1    | 8389_at_x15   | 4.83E-05 |
| YJL178C | ATG27   | 11202_at_x15  | 4.96E-05 |
| YNL242W | ATG2    | 8750_at_x06   | 5.25E-05 |
| YER144C | UBP5    | 5584_at_x06   | 5.73E-05 |
| YLR287C | YLR287C | 9783_at_x15   | 5.85E-05 |
| YML096W | YML096W | 9748_at_x13   | 5.95E-05 |
| YLR443W | ECM7    | 9893_at_x10   | 6.77E-05 |
| YML091C | RPM2    | 9754_at_x01   | 7.18E-05 |
| YFR013W | IOC3    | 5354_at_x10   | 8.04E-05 |
| YGR209C | TRX2    | 4774_at_x05   | 8.48E-05 |
| YML013W | UBX2    | 9652_at_x12   | 9.30E-05 |
| YGR001C | EFM5    | 5018_at_x02   | 9.40E-05 |
| YHR054C | YHR054C | 4484_s_at_x02 | 9.52E-05 |
| YGL192W | IME4    | 5187_at_x09   | 1.07E-04 |
| YJR025C | BNA1    | 10873_at_x15  | 1.24E-04 |
| YOL130W | ALR1    | 8704_at_x03   | 1.28E-04 |
| YLR368W | MDM30   | 9949_at_x05   | 1.42E-04 |
| YIL043C | CBR1    | 4128_at_x12   | 1.73E-04 |
| YGR289C | MAL11   | 4719_at_x02   | 1.81E-04 |
| YLL038C | ENT4    | 10393_at_x11  | 1.83E-04 |
| YHR039C | MSC7    | 4513_at_x10   | 2.02E-04 |
| YLR426W | TDA5    | 9873_at_x09   | 2.28E-04 |
| YOR101W | RAS1    | 8438_at_x08   | 2.41E-04 |
| YBR061C | TRM7    | 7284_at_x12   | 2.75E-04 |
| YNL135C | FPR1    | 8987_at_x10   | 2.80E-04 |
| YLR176C | RFX1    | 10156_at_x15  | 2.83E-04 |
| YER035W | EDC2    | 5690_at_x09   | 2.86E-04 |
| YGR184C | UBR1    | 2147_at_x01   | 2.87E-04 |
| YIL133C | RPL16a  | 4223_at_x03   | 2.95E-04 |
| YLR059C | REX2    | 10268_at_x01  | 3.03E-04 |
| YER046W | SPO73   | 5499_at_x02   | 3.21E-04 |
| YOL073C | DSC2    | 8624_at_x10   | 3.62E-04 |
| YOR103C | OST2    | 8439_at_x11   | 3.66E-04 |
| YGR168C | YGR168C | 4823_at_x00   | 3.89E-04 |
| YMR123W | PKR1    | 9522_at_x06   | 4.79E-04 |
| YER186C | YER186C | 5535_at_x08   | 4.84E-04 |

|           |         |               |          |
|-----------|---------|---------------|----------|
| YBL007C   | SLA1    | 7354_at_x10   | 5.01E-04 |
| YEL058W   | PCM1    | 5777_at_x04   | 5.24E-04 |
| YNR012W   | URK1    | 8860_at_x09   | 5.74E-04 |
| YDL147W   | RPN5    | 6628_at_x15   | 6.74E-04 |
| YGR207C   | CIR1    | 4817_at_x04   | 6.85E-04 |
| YJL051W   | IRC8    | 11062_at_x04  | 7.08E-04 |
| YKL110C   | KTI12   | 10674_at_x03  | 7.54E-04 |
| YOR196C   | LIP5    | 8353_at_x08   | 7.87E-04 |
| YLL061W   | MMP1    | 10415_at_x13  | 8.20E-04 |
| YER020W   | GPA2    | 5495_at_x13   | 8.64E-04 |
| YLL035W   | GRC3    | 10351_at_x06  | 8.70E-04 |
| YDL171C   | GLT1    | 2416_at_x04   | 8.93E-04 |
| YLR257W   | YLR257W | 10059_at_x00  | 8.96E-04 |
| YJR103W   | URA8    | 10942_at_x05  | 9.19E-04 |
| YDR528W   | HLR1    | 5952_at_x08   | 9.68E-04 |
| YOL097C   | WRS1    | 8123_at_x07   | 1.04E-03 |
| YJL212C   | OPT1    | 11260_at_x12  | 1.15E-03 |
| YGR211W   | ZPR1    | 4776_at_x14   | 1.15E-03 |
| YIR026C   | YVH1    | 4062_at_x07   | 1.16E-03 |
| YDR420W   | HKR1    | 2334_s_at_x03 | 1.17E-03 |
| YJR088C   | EMC2    | 10927_at_x00  | 1.18E-03 |
| YEL068C   | YEL068C | 5814_at_x00   | 1.25E-03 |
| YBR121C   | GRS1    | 7257_at_x09   | 1.37E-03 |
| YJR068W   | RFC2    | 10952_at_x08  | 1.38E-03 |
| YPL001W   | HAT1    | 7752_at_x07   | 1.39E-03 |
| YER116C   | SLX8    | 5601_at_x14   | 1.43E-03 |
| YGR006W   | PRP18   | 5023_at_x00   | 1.46E-03 |
| YDL164C   | CDC9    | 6656_at_x14   | 1.46E-03 |
| YDR319C   | YFT2    | 6150_at_x06   | 1.55E-03 |
| YJL149W   | DAS1    | 11189_at_x01  | 1.57E-03 |
| YBL017C   | PEP1    | 2455_at_x06   | 1.57E-03 |
| YBL020W   | RFT1    | 7387_at_x06   | 1.74E-03 |
| YDR058C   | TGL2    | 6427_at_x03   | 1.79E-03 |
| YER023W   | PRO3    | 5678_at_x00   | 1.97E-03 |
| YDR515W   | SLF1    | 5939_at_x03   | 2.04E-03 |
| YPR196W   | YPR196W | 7548_at_x14   | 2.10E-03 |
| YGR150C   | CCM1    | 4850_at_x02   | 2.25E-03 |
| YDL135C   | RDI1    | 6639_at_x01   | 2.33E-03 |
| YIL158W   | AIM20   | 4243_at_x05   | 2.35E-03 |
| YEL056W   | HAT2    | 5779_at_x08   | 2.40E-03 |
| YEL020W-A | TIM9    | 5488_at_x12   | 2.40E-03 |
| YMR209C   | YMR209C | 9436_at_x04   | 2.64E-03 |
| YKR075C   | YKR075C | 10500_at_x00  | 2.80E-03 |
| YJL208C   | NUC1    | 11218_at_x15  | 2.87E-03 |
| YGR028W   | MSP1    | 4956_at_x13   | 2.95E-03 |
| YJR008W   | MHO1    | 10830_at_x03  | 3.17E-03 |
| YNL215W   | IES2    | 9088_at_x10   | 3.21E-03 |

|           |         |               |          |
|-----------|---------|---------------|----------|
| YBL029W   | YBL029W | 6998_at_x08   | 3.31E-03 |
| YNR036C   | MRPS12  | 8839_at_x00   | 3.50E-03 |
| YLR064W   | PER33   | 10273_at_x08  | 3.60E-03 |
| YJR108W   | ABM1    | 10901_at_x07  | 3.60E-03 |
| YER150W   | SPI1    | 5544_at_x08   | 3.60E-03 |
| YDL111C   | RRP42   | 6575_at_x00   | 3.68E-03 |
| YER019W   | ISC1    | 5719_at_x13   | 3.71E-03 |
| YGR222W   | PET54   | 4788_at_x07   | 4.03E-03 |
| YMR215W   | GAS3    | 9397_at_x01   | 4.19E-03 |
| YNR034W   | SOL1    | 8788_at_x00   | 4.27E-03 |
| YBL030C   | PET9    | 7375_at_x15   | 4.77E-03 |
| YHR016C   | YSC84   | 4535_at_x14   | 4.91E-03 |
| YIL112W   | HOS4    | 4199_at_x06   | 5.42E-03 |
| YOR043W   | WHI2    | 8516_at_x00   | 5.46E-03 |
| YOR251C   | TUM1    | 8318_at_x01   | 5.65E-03 |
| YNL022C   | RCM1    | 8742_at_x06   | 5.85E-03 |
| YGL004C   | RPN14   | 5013_at_x15   | 5.94E-03 |
| YBL079W   | NUP170  | 2446_at_x06   | 6.10E-03 |
| YOR127W   | RGA1    | 8419_at_x07   | 6.29E-03 |
| YCR031C   | RPS14a  | 2438_at_x03   | 6.35E-03 |
| YML071C   | COG8    | 9728_at_x02   | 6.53E-03 |
| YDR180W   | SCC2    | 6282_at_x03   | 6.73E-03 |
| YMR062C   | ARG7    | 9592_at_x03   | 6.84E-03 |
| YDL097C   | RPN6    | 6589_at_x13   | 7.08E-03 |
| YBR037C   | SCO1    | 7351_at_x00   | 7.18E-03 |
| YGR149W   | GPC1    | 4849_at_x04   | 7.23E-03 |
| YGL257C   | MNT2    | 5256_at_x15   | 7.35E-03 |
| YGL178W   | MPT5    | 5202_at_x00   | 7.73E-03 |
| YOR371C   | GPB1    | 8170_at_x08   | 7.76E-03 |
| YBR008C   | FLR1    | 7367_at_x15   | 7.78E-03 |
| YDL103C   | QRI1    | 6583_at_x15   | 7.92E-03 |
| YLR442C   | SIR3    | 9891_at_x15   | 8.00E-03 |
| YHR209W   | CRG1    | 4290_at_x06   | 8.00E-03 |
| YBR071W   | YBR071W | 7294_at_x14   | 8.31E-03 |
| YJR040W   | GEF1    | 10969_at_x03  | 8.54E-03 |
| YDL155W   | CLB3    | 6620_at_x15   | 8.82E-03 |
| YML110C   | COQ5    | 9210_at_x05   | 8.87E-03 |
| YEL055C   | POL5    | 5780_at_x07   | 8.99E-03 |
| YOL147C   | PEX11   | 8687_at_x14   | 9.11E-03 |
| YHR050W   | SMF2    | 4480_at_x15   | 9.15E-03 |
| YNL200C   | NNR1    | 9059_at_x07   | 9.34E-03 |
| YBR157C   | ICS2    | 7026_at_x11   | 9.41E-03 |
| YBR193C   | MED8    | 7149_at_x15   | 9.55E-03 |
| YEL076W-C | Unknown | 5808_i_at_x01 | 9.63E-03 |
| YKL021C   | MAK11   | 10586_at_x01  | 9.73E-03 |
| YBR126C   | TPS1    | 7217_at_x04   | 9.88E-03 |
| YDL211C   | YDL211C | 6697_at_x14   | 9.89E-03 |

|         |         |               |          |
|---------|---------|---------------|----------|
| YIR022W | SEC11   | 4058_at_x11   | 1.02E-02 |
| YEL071W | DLD3    | 5813_at_x00   | 1.02E-02 |
| YIL066C | RNR3    | 4045_s_at_x07 | 1.05E-02 |
| YML007W | YAP1    | 9662_at_x07   | 1.05E-02 |
| YBR154C | RPB5    | 7200_at_x13   | 1.05E-02 |
| YNL024C | EFM6    | 8774_at_x00   | 1.05E-02 |
| YPL031C | PHO85   | 7767_at_x07   | 1.10E-02 |
| YNL124W | NAF1    | 8998_at_x00   | 1.11E-02 |
| YDL002C | NHP10   | 6460_at_x04   | 1.12E-02 |
| YLR435W | TSR2    | 9882_at_x08   | 1.14E-02 |
| YIL009W | FAA3    | 4118_at_x07   | 1.16E-02 |
| YBR077C | SLM4    | 7300_at_x03   | 1.18E-02 |
| YGR258C | RAD2    | 4596_at_x07   | 1.20E-02 |
| YER049W | TPA1    | 5510_at_x14   | 1.22E-02 |
| YBR229C | ROT2    | 7139_at_x15   | 1.24E-02 |
| YLR237W | THI7    | 10084_at_x10  | 1.24E-02 |
| YDL047W | SIT4    | 5852_at_x15   | 1.27E-02 |
| YKL116C | PRR1    | 10669_at_x07  | 1.27E-02 |
| YDR351W | SBE2    | 6137_at_x10   | 1.30E-02 |
| YMR046C | YMR046C | 2822_at_x03   | 1.31E-02 |
| YOL018C | TLG2    | 8126_at_x12   | 1.32E-02 |
| YBR087W | RFC5    | 7265_at_x05   | 1.33E-02 |
| YGL176C | YGL176C | 5204_at_x04   | 1.36E-02 |
| YBL089W | AVT5    | 7452_at_x15   | 1.39E-02 |
| YHR029C | YHI9    | 4298_at_x08   | 1.40E-02 |
| YOR117W | RPT5    | 8454_at_x09   | 1.40E-02 |
| YKR052C | MRS4    | 10524_at_x01  | 1.41E-02 |
| YJL047C | RTT101  | 11066_at_x15  | 1.42E-02 |
| YJR086W | STE18   | 10927_at_x12  | 1.43E-02 |
| YOR264W | DSE3    | 8284_at_x08   | 1.44E-02 |
| YGL242C | YGL242C | 5271_at_x02   | 1.46E-02 |
| YIL142W | CCT2    | 4259_at_x14   | 1.52E-02 |
| YCL024W | KCC4    | 6908_at_x10   | 1.53E-02 |
| YLL040C | VPS13   | 2932_at_x01   | 1.59E-02 |
| YOR389W | YOR389W | 8143_at_x00   | 1.62E-02 |
| YKL019W | RAM2    | 10452_at_x05  | 1.67E-02 |
| YPL183C | RTT10   | 7932_at_x02   | 1.68E-02 |
| YBR225W | YBR225W | 7135_at_x15   | 1.69E-02 |
| YDR481C | PHO8    | 5995_at_x12   | 1.70E-02 |
| YNL138W | SRV2    | 8984_at_x09   | 1.70E-02 |
| YNL280C | ERG24   | 9159_at_x00   | 1.70E-02 |
| YBR249C | ARO4    | 7114_at_x13   | 1.75E-02 |
| YML121W | GTR1    | 9764_at_x09   | 1.78E-02 |
| YHL007C | STE20   | 4555_at_x10   | 1.80E-02 |
| YNL322C | KRE1    | 9208_at_x15   | 1.80E-02 |
| YNL321W | VNX1    | 9163_at_x03   | 1.82E-02 |
| YKL125W | RRN3    | 10703_at_x13  | 1.85E-02 |



|         |         |               |          |
|---------|---------|---------------|----------|
| YGR208W | SER2    | 4818_at_x05   | 1.88E-02 |
| YOL081W | IRA2    | 2699_at_x07   | 1.89E-02 |
| YLR056W | ERG3    | 10265_at_x10  | 1.93E-02 |
| YPL226W | NEW1    | 7978_at_x11   | 1.94E-02 |
| YKL184W | SPE1    | 10779_at_x00  | 1.97E-02 |
| YLR452C | SST2    | 9856_at_x07   | 1.97E-02 |
| YDR513W | GRX2    | 5937_at_x10   | 1.98E-02 |
| YPL234C | VMA11   | 7970_at_x07   | 2.01E-02 |
| YLR181C | VTA1    | 10162_at_x15  | 2.05E-02 |
| YBL105C | PKC1    | 7481_at_x13   | 2.07E-02 |
| YFL018C | LPD1    | 5275_i_at_x02 | 2.10E-02 |
| YPL071C | YPL071C | 7818_at_x01   | 2.11E-02 |
| YCR071C | IMG2    | 6812_at_x10   | 2.13E-02 |
| YAL009W | SPO7    | 11312_at_x00  | 2.15E-02 |
| YDL150W | RPC53   | 6624_at_x01   | 2.16E-02 |
| YGL195W | GCN1    | 2263_g_at_x07 | 2.18E-02 |
| YMR158W | MRPS8   | 9469_at_x13   | 2.23E-02 |
| YJR097W | JJJ3    | 10936_at_x15  | 2.28E-02 |
| YOR092W | ECM3    | 8474_at_x06   | 2.30E-02 |
| YPR080W | TEF1    | 7522_at_x15   | 2.35E-02 |
| YOR033C | EXO1    | 8506_at_x05   | 2.38E-02 |
| YOL093W | TRM10   | 8650_at_x11   | 2.40E-02 |
| YJL058C | BIT61   | 11100_at_x13  | 2.43E-02 |
| YEL064C | AVT2    | 5770_at_x06   | 2.44E-02 |
| YFL047W | RGD2    | 5433_at_x10   | 2.45E-02 |
| YFL016C | MDJ1    | 5370_at_x07   | 2.48E-02 |
| YOR054C | VHS3    | 8482_at_x04   | 2.49E-02 |
| YHR104W | GRE3    | 4442_at_x03   | 2.49E-02 |
| YIL171W | YIL171W | 4282_f_at_x04 | 2.50E-02 |
| YDL116W | NUP84   | 6615_at_x01   | 2.50E-02 |
| YLR449W | FPR4    | 9853_at_x01   | 2.53E-02 |
| YFR004W | RPN11   | 5346_at_x05   | 2.58E-02 |
| YFR011C | MIC19   | 5353_at_x00   | 2.59E-02 |
| YGR157W | CHO2    | 4858_at_x11   | 2.64E-02 |
| YLR096W | KIN2    | 2883_at_x07   | 2.65E-02 |
| YML072C | TCB3    | 9727_at_x12   | 2.66E-02 |
| YML048W | GSF2    | 9709_at_x03   | 2.71E-02 |
| YKL073W | LHS1    | 10668_at_x04  | 2.72E-02 |
| YMR154C | RIM13   | 9465_at_x13   | 2.74E-02 |
| YFR047C | BNA6    | 5301_at_x13   | 2.74E-02 |
| YJL187C | SWE1    | 11193_at_x15  | 2.78E-02 |
| YPR015C | YPR015C | 7722_at_x06   | 2.88E-02 |
| YDL167C | NRP1    | 6653_at_x11   | 2.94E-02 |
| YDR530C | APA2    | 5954_at_x03   | 3.03E-02 |
| YBR222C | PCS60   | 7132_at_x01   | 3.09E-02 |
| YDR178W | SDH4    | 6279_at_x10   | 3.09E-02 |
| YOR080W | DIA2    | 8461_at_x00   | 3.17E-02 |

|         |         |               |          |
|---------|---------|---------------|----------|
| YKL067W | YNK1    | 10630_at_x12  | 3.23E-02 |
| YJL218W | YJL218W | 11254_at_x12  | 3.27E-02 |
| YMR192W | GYL1    | 9417_at_x14   | 3.27E-02 |
| YBR239C | ERT1    | 6971_at_x12   | 3.33E-02 |
| YFR042W | KEG1    | 5341_at_x03   | 3.39E-02 |
| YHR027C | RPN1    | 4501_at_x05   | 3.39E-02 |
| YHR063C | PAN5    | 4491_at_x08   | 3.47E-02 |
| YOL026C | MIM1    | 8581_at_x04   | 3.48E-02 |
| YMR067C | UBX4    | 9597_at_x10   | 3.53E-02 |
| YNL074C | MLF3    | 8958_at_x14   | 3.56E-02 |
| YHR023W | MYO1    | 2110_s_at_x07 | 3.58E-02 |
| YCL039W | GID7    | 6893_at_x00   | 3.59E-02 |
| YER088C | DOT6    | 5617_at_x13   | 3.63E-02 |
| YNL278W | CAF120  | 9161_at_x03   | 3.64E-02 |
| YLR180W | SAM1    | 9779_at_x13   | 3.66E-02 |
| YGR194C | XKS1    | 4804_at_x15   | 3.70E-02 |
| YDR383C | NKP1    | 6081_at_x10   | 3.72E-02 |
| YBR196C | PGI1    | 7152_at_x15   | 3.81E-02 |
| YPL058C | PDR12   | 7496_at_x02   | 3.86E-02 |
| YIL165C | YIL165C | 4237_at_x12   | 3.91E-02 |
| YER182W | FMP10   | 5531_at_x15   | 3.97E-02 |
| YPL012W | RRP12   | 7786_at_x15   | 3.97E-02 |
| YDL133W | SRF1    | 6595_at_x02   | 4.08E-02 |
| YBL014C | RRN6    | 7393_at_x14   | 4.09E-02 |
| YOL088C | MPD2    | 8655_at_x03   | 4.12E-02 |
| YJL118W | YJL118W | 11131_at_x05  | 4.17E-02 |
| YMR005W | TAF4    | 9627_at_x09   | 4.22E-02 |
| YPL237W | SUI3    | 8012_at_x12   | 4.34E-02 |
| YPL147W | PXA1    | 7923_at_x15   | 4.39E-02 |
| YDR321W | ASPI    | 6152_at_x13   | 4.42E-02 |
| YGR288W | MAL13   | 4718_at_x02   | 4.56E-02 |
| YFL049W | SWP82   | 5431_at_x14   | 4.65E-02 |
| YJR036C | HUL4    | 10966_at_x12  | 4.71E-02 |
| YML036W | CGI121  | 9672_at_x06   | 4.71E-02 |
| YML038C | YMD8    | 9670_at_x04   | 4.78E-02 |
| YIR028W | DAL4    | 4064_at_x02   | 4.79E-02 |
| YOL062C | APM4    | 8635_at_x01   | 4.89E-02 |

**Table S2: List of all pairwise connections and bootstrap frequency and corresponding coefficients.**

| Source Gene<br>(ORF Name) | Source Gene<br>(Gene Name) | Target Gene<br>(ORF Name) | Target Gene<br>(Gene Name) | Bootstrap<br>Frequency | Coefficient |
|---------------------------|----------------------------|---------------------------|----------------------------|------------------------|-------------|
| YEL021W                   | URA3                       | YER088C                   | DOT6                       | 1.0000                 | -0.4990     |
| YFL047W                   | RGD2                       | YLR452C                   | SST2                       | 1.0000                 | 0.5704      |
| YHR034C                   | PIH1                       | YHR033W                   | YHR033W                    | 1.0000                 | 0.5577      |
| YLR155C                   | ASP3-1                     | YIL066C                   | RNR3                       | 1.0000                 | -0.4472     |
| YLR181C                   | VTA1                       | YLR180W                   | SAM1                       | 1.0000                 | 0.4847      |
| YLR452C                   | SST2                       | YFL047W                   | RGD2                       | 1.0000                 | 0.6046      |
| YLR464W                   | YLR464W                    | YEL076W-C                 | Unknown                    | 1.0000                 | 0.5714      |
| YKL073W                   | LHS1                       | YGR028W                   | MSP1                       | 0.9999                 | 0.3485      |
| YLR180W                   | SAM1                       | YLR181C                   | VTA1                       | 0.9999                 | 0.5491      |
| YIL133C                   | RPL16a                     | YDR064W                   | RPS13                      | 0.9997                 | 0.6995      |
| YIL119C                   | RPI1                       | YDR144C                   | MKC7                       | 0.9997                 | -0.4163     |
| YHR033W                   | YHR033W                    | YHR034C                   | PIH1                       | 0.9996                 | 0.6239      |
| YHR043C                   | DOG2                       | YLR237W                   | THI7                       | 0.9992                 | -0.3227     |
| YBR196C                   | PGI1                       | YBL020W                   | RFT1                       | 0.9988                 | 0.4588      |
| YBL020W                   | RFT1                       | YBR196C                   | PGI1                       | 0.9985                 | 0.4280      |
| YEL056W                   | HAT2                       | YEL055C                   | POL5                       | 0.9981                 | 0.3138      |
| YBR147W                   | RTC2                       | YJR025C                   | BNA1                       | 0.9980                 | 0.6270      |
| YAL056W                   | GPB2                       | YOL147C                   | PEX11                      | 0.9940                 | -0.4379     |
| YCL018W                   | LEU2                       | YEL071W                   | DLD3                       | 0.9931                 | -0.2646     |
| YAL051W                   | OAF1                       | YGL004C                   | RPN14                      | 0.9914                 | 0.4359      |
| YDR064W                   | RPS13                      | YIL133C                   | RPL16a                     | 0.9902                 | 0.4493      |
| YEL076W-C                 | Unknown                    | YLR464W                   | YLR464W                    | 0.9894                 | 0.2822      |
| YDL147W                   | RPN5                       | YDL097C                   | RPN6                       | 0.9884                 | 0.5847      |
| YJR073C                   | OPI3                       | YDR497C                   | ITR1                       | 0.9871                 | 0.5756      |
| YGR184C                   | UBR1                       | YGL195W                   | GCN1                       | 0.9863                 | 0.2998      |
| YHR023W                   | MYO1                       | YFL049W                   | SWP82                      | 0.9853                 | 0.4535      |
| YDR497C                   | ITR1                       | YJR008W                   | MHO1                       | 0.9842                 | 0.3354      |
| YIL043C                   | CBR1                       | YDR321W                   | ASP1                       | 0.9823                 | 0.5072      |
| YCR041W                   | YCR041W                    | YJL171C                   | TOH1                       | 0.9822                 | -0.4116     |
| YGR028W                   | MSP1                       | YKL073W                   | LHS1                       | 0.9820                 | 0.4867      |
| YCL018W                   | LEU2                       | YHR063C                   | PAN5                       | 0.9817                 | -0.3329     |
| YOR092W                   | ECM3                       | YIL119C                   | RPI1                       | 0.9765                 | 0.3640      |
| YPL064C                   | CWC27                      | YKL110C                   | KTI12                      | 0.9706                 | 0.3136      |
| YFR047C                   | BNA6                       | YLR231C                   | BNA5                       | 0.9705                 | 0.6570      |
| YJL217W                   | REE1                       | YFL056C                   | AAD6                       | 0.9702                 | -0.2268     |
| YLR430W                   | SEN1                       | YGL207W                   | SPT16                      | 0.9677                 | 0.2521      |
| YLR046C                   | YLR046C                    | YLR047C                   | FRE8                       | 0.9673                 | 0.3440      |
| YDR528W                   | HLR1                       | YKL073W                   | LHS1                       | 0.9671                 | 0.2692      |
| YIL119C                   | RPI1                       | YBR157C                   | ICS2                       | 0.9658                 | 0.3653      |
| YAL051W                   | OAF1                       | YEL068C                   | YEL068C                    | 0.9648                 | -0.2857     |
| YJR025C                   | BNA1                       | YBR147W                   | RTC2                       | 0.9647                 | 0.2827      |

|           |           |         |         |        |         |
|-----------|-----------|---------|---------|--------|---------|
| YBR249C   | ARO4      | YEL071W | DLD3    | 0.9626 | 0.5022  |
| YLR047C   | FRE8      | YLR046C | YLR046C | 0.9619 | 0.3519  |
| YBR037C   | SCO1      | YER182W | FMP10   | 0.9616 | 0.4932  |
| YDL147W   | RPN5      | YOR117W | RPT5    | 0.9615 | 0.4508  |
| YLR064W   | PER33     | YPL234C | VMA11   | 0.9612 | 0.3063  |
| YFL049W   | SWP82     | YHR023W | MYO1    | 0.9592 | 0.2609  |
| YGR207C   | CIR1      | YJL140W | RPB4    | 0.9589 | 0.3513  |
| YJR086W   | STE18     | YKL160W | ELF1    | 0.9577 | 0.3497  |
| YBR249C   | ARO4      | YMR062C | ARG7    | 0.9575 | 0.3579  |
| YBR137W   | YBR137W   | YBR126C | TPS1    | 0.9570 | 0.3225  |
| YEL055C   | POL5      | YEL056W | HAT2    | 0.9567 | 0.7187  |
| YGR184C   | UBR1      | YOL081W | IRA2    | 0.9567 | 0.3605  |
| YDL002C   | NHP10     | YDR339C | FCF1    | 0.9552 | 0.4545  |
| YFR037C   | RSC8      | YLR455W | PDP3    | 0.9551 | 0.3732  |
| YCR071C   | IMG2      | YKR085C | MRPL20  | 0.9548 | 0.3513  |
| YKL110C   | KTI12     | YPL064C | CWC27   | 0.9526 | 0.3933  |
| YIL119C   | RPI1      | YOR092W | ECM3    | 0.9519 | 0.2745  |
| YPL234C   | VMA11     | YLR064W | PER33   | 0.9509 | 0.5516  |
| YBR249C   | ARO4      | YHR029C | YHI9    | 0.9496 | 0.4029  |
| YOR251C   | TUM1      | YBR121C | GRS1    | 0.9474 | 0.2804  |
| YBR249C   | ARO4      | YDR531W | CAB1    | 0.9472 | 0.5431  |
| YOL093W   | TRM10     | YBR154C | RPB5    | 0.9466 | 0.4419  |
| YJL047C   | RTT101    | YGR288W | MAL13   | 0.9448 | 0.4420  |
| YBL007C   | SLA1      | YBR229C | ROT2    | 0.9435 | 0.3700  |
| YKL073W   | LHS1      | YJL036W | SNX4    | 0.9411 | 0.3857  |
| YDR351W   | SBE2      | YDR034C | LYS14   | 0.9410 | 0.3304  |
| YBR071W   | YBR071W   | YBR225W | YBR225W | 0.9398 | 0.2259  |
| YBR132C   | AGP2      | YOR264W | DSE3    | 0.9396 | 0.2817  |
| YBR154C   | RPB5      | YBR061C | TRM7    | 0.9390 | 0.6173  |
| YJR073C   | OPI3      | YER026C | CHO1    | 0.9389 | 0.4519  |
| YEL021W   | URA3      | YER116C | SLX8    | 0.9381 | 0.3273  |
| YHR029C   | YHI9      | YIL165C | YIL165C | 0.9380 | 0.7819  |
| YGR012W   | MCY1      | YHR063C | PAN5    | 0.9358 | 0.2640  |
| YOL081W   | IRA2      | YGR184C | UBR1    | 0.9357 | 0.4018  |
| YNL200C   | NNR1      | YHR104W | GRE3    | 0.9355 | 0.4475  |
| YGL004C   | RPN14     | YAL051W | OAF1    | 0.9354 | 0.4729  |
| YBR157C   | ICS2      | YIL119C | RPI1    | 0.9350 | 0.2045  |
| YIL111W   | COX5b     | YER035W | EDC2    | 0.9327 | 0.2924  |
| YJR073C   | OPI3      | YJL212C | OPT1    | 0.9321 | -0.2273 |
| YIL015C-A | YIL015C-A | YMR046C | YMR046C | 0.9318 | 0.2653  |
| YOR117W   | RPT5      | YDL147W | RPN5    | 0.9316 | 0.2321  |
| YIL171W   | YIL171W   | YDR441C | APT2    | 0.9307 | 0.3353  |
| YOR054C   | VHS3      | YLR206W | ENT2    | 0.9307 | 0.3206  |
| YBR077C   | SLM4      | YBR037C | SCO1    | 0.9306 | 0.3047  |
| YMR062C   | ARG7      | YBR249C | ARO4    | 0.9300 | 0.3710  |
| YOR103C   | OST2      | YGR209C | TRX2    | 0.9300 | 0.3146  |
| YJR040W   | GEF1      | YGR157W | CHO2    | 0.9298 | 0.2346  |

|         |         |           |         |        |         |
|---------|---------|-----------|---------|--------|---------|
| YOR251C | TUM1    | YER023W   | PRO3    | 0.9298 | 0.3531  |
| YHR027C | RPN1    | YDL097C   | RPN6    | 0.9297 | 0.2436  |
| YKR085C | MRPL20  | YEL020W-A | TIM9    | 0.9296 | 0.3872  |
| YJL208C | NUC1    | YFL016C   | MDJ1    | 0.9293 | 0.4257  |
| YFL018C | LPD1    | YPL031C   | PHO85   | 0.9264 | 0.2966  |
| YOR142W | LSC1    | YDR178W   | SDH4    | 0.9253 | 0.3571  |
| YLR452C | SST2    | YDL089W   | NUR1    | 0.9233 | 0.3505  |
| YBL030C | PET9    | YFR011C   | MIC19   | 0.9222 | 0.2626  |
| YML038C | YMD8    | YBR137W   | YBR137W | 0.9212 | -0.1951 |
| YPL233W | NSL1    | YLR442C   | SIR3    | 0.9210 | 0.2528  |
| YNL074C | MLF3    | YKR080W   | MTD1    | 0.9205 | 0.3844  |
| YOL089C | HAL9    | YLL028W   | TPO1    | 0.9205 | -0.3118 |
| YBL030C | PET9    | YOR142W   | LSC1    | 0.9203 | 0.2974  |
| YML091C | RPM2    | YMR046C   | YMR046C | 0.9196 | 0.3406  |
| YJL036W | SNX4    | YML071C   | COG8    | 0.9175 | 0.3249  |
| YLR237W | THI7    | YBR239C   | ERT1    | 0.9165 | 0.1998  |
| YBL079W | NUP170  | YBR077C   | SLM4    | 0.9164 | 0.4374  |
| YEL064C | AVT2    | YKR051W   | YKR051W | 0.9160 | 0.2721  |
| YNL322C | KRE1    | YER019W   | ISC1    | 0.9159 | 0.4340  |
| YIL040W | APQ12   | YDR367W   | KEI1    | 0.9153 | 0.3307  |
| YBR137W | YBR137W | YBR225W   | YBR225W | 0.9146 | 0.2766  |
| YDR383C | NKP1    | YPL001W   | HAT1    | 0.9130 | 0.4103  |
| YIL119C | RPI1    | YFL047W   | RGD2    | 0.9121 | 0.1975  |
| YGL195W | GCN1    | YGR184C   | UBR1    | 0.9115 | 0.3798  |
| YDR321W | ASP1    | YIL043C   | CBR1    | 0.9109 | 0.4926  |
| YKL160W | ELF1    | YGL226C-A | OST5    | 0.9101 | 0.2530  |
| YKL160W | ELF1    | YJR086W   | STE18   | 0.9099 | 0.3127  |
| YER026C | CHO1    | YJR073C   | OPI3    | 0.9098 | 0.3161  |
| YBL017C | PEP1    | YBR229C   | ROT2    | 0.9088 | 0.3147  |
| YEL068C | YEL068C | YAL051W   | OAF1    | 0.9082 | -0.2839 |
| YIR028W | DAL4    | YJL218W   | YJL218W | 0.9062 | 0.4861  |
| YOL062C | APM4    | YEL058W   | PCM1    | 0.9054 | 0.3151  |
| YDR531W | CAB1    | YDR034C   | LYS14   | 0.9053 | 0.3123  |
| YFR011C | MIC19   | YBL030C   | PET9    | 0.9035 | 0.3804  |
| YDR497C | ITR1    | YJR073C   | OPI3    | 0.9024 | 0.2420  |
| YMR046C | YMR046C | YGL035C   | MIG1    | 0.9021 | -0.3225 |
| YML048W | GSF2    | YMR215W   | GAS3    | 0.9005 | 0.3793  |
| YOL104C | NDJ1    | YLL028W   | TPO1    | 0.9001 | -0.4246 |
| YDR319C | YFT2    | YDR441C   | APT2    | 0.8987 | 0.3104  |
| YDR528W | HLR1    | YDL211C   | YDL211C | 0.8977 | 0.3785  |
| YOR142W | LSC1    | YBL030C   | PET9    | 0.8962 | 0.3817  |
| YIL111W | COX5b   | YJR103W   | URA8    | 0.8934 | 0.3163  |
| YOL093W | TRM10   | YLR287C   | YLR287C | 0.8931 | 0.3405  |
| YHR034C | PIH1    | YKR080W   | MTD1    | 0.8902 | -0.2946 |
| YLR056W | ERG3    | YNL280C   | ERG24   | 0.8884 | 0.2795  |
| YOR080W | DIA2    | YER144C   | UBP5    | 0.8884 | 0.2860  |
| YOR196C | LIP5    | YMR062C   | ARG7    | 0.8881 | 0.2247  |

|         |         |         |         |        |         |
|---------|---------|---------|---------|--------|---------|
| YBR249C | ARO4    | YCL009C | ILV6    | 0.8879 | 0.4896  |
| YGR194C | XKS1    | YBR126C | TPS1    | 0.8877 | 0.4379  |
| YMR215W | GAS3    | YML048W | GSF2    | 0.8867 | 0.3631  |
| YDL089W | NUR1    | YLR452C | SST2    | 0.8866 | 0.2250  |
| YBR225W | YBR225W | YBR071W | YBR071W | 0.8848 | 0.3076  |
| YER035W | EDC2    | YIL111W | COX5b   | 0.8844 | 0.5106  |
| YFL016C | MDJ1    | YJL208C | NUC1    | 0.8841 | 0.2204  |
| YGR288W | MAL13   | YJL047C | RTT101  | 0.8836 | 0.5538  |
| YDR528W | HLR1    | YIL061C | SNP1    | 0.8835 | 0.2293  |
| YLR231C | BNA5    | YFR047C | BNA6    | 0.8833 | 0.3342  |
| YBR008C | FLR1    | YGL192W | IME4    | 0.8830 | 0.2570  |
| YGL195W | GCN1    | YPL226W | NEW1    | 0.8828 | 0.3618  |
| YDL097C | RPN6    | YDL147W | RPN5    | 0.8827 | 0.4023  |
| YIL111W | COX5b   | YPL071C | YPL071C | 0.8827 | 0.3240  |
| YML110C | COQ5    | YMR152W | YIM1    | 0.8819 | 0.3675  |
| YDL155W | CLB3    | YCR031C | RPS14a  | 0.8800 | -0.2578 |
| YER023W | PRO3    | YOR251C | TUM1    | 0.8799 | 0.4687  |
| YGR207C | CIR1    | YOR131C | YOR131C | 0.8798 | 0.4099  |
| YER144C | UBP5    | YJR088C | EMC2    | 0.8788 | -0.1530 |
| YML091C | RPM2    | YLR096W | KIN2    | 0.8784 | 0.1979  |
| YJR008W | MHO1    | YDR497C | ITR1    | 0.8758 | 0.1467  |
| YBR229C | ROT2    | YBL007C | SLA1    | 0.8732 | 0.4195  |
| YIL119C | RPI1    | YLR231C | BNA5    | 0.8729 | 0.1642  |
| YPL226W | NEW1    | YGL195W | GCN1    | 0.8722 | 0.3996  |
| YNL280C | ERG24   | YLR056W | ERG3    | 0.8718 | 0.4432  |
| YLR096W | KIN2    | YML091C | RPM2    | 0.8716 | 0.2913  |
| YBR137W | YBR137W | YML038C | YMD8    | 0.8708 | -0.3063 |
| YEL071W | DLD3    | YJR074W | MOG1    | 0.8704 | -0.3677 |
| YCL009C | ILV6    | YKL184W | SPE1    | 0.8685 | 0.2640  |
| YHL007C | STE20   | YIL166C | YIL166C | 0.8678 | -0.3363 |
| YOL018C | TLG2    | YOL043C | NTG2    | 0.8671 | 0.4011  |
| YHR034C | PIH1    | YER035W | EDC2    | 0.8663 | 0.2160  |
| YMR123W | PKR1    | YLR172C | DPH5    | 0.8660 | 0.1807  |
| YGL207W | SPT16   | YHR027C | RPN1    | 0.8653 | 0.2126  |
| YLR455W | PDP3    | YDR351W | SBE2    | 0.8613 | 0.1394  |
| YNL280C | ERG24   | YHR039C | MSC7    | 0.8606 | 0.3659  |
| YKL096W | CWP1    | YDL111C | RRP42   | 0.8601 | 0.2670  |
| YGR157W | CHO2    | YJR040W | GEF1    | 0.8600 | 0.4000  |
| YOR264W | DSE3    | YNL322C | KRE1    | 0.8586 | -0.2831 |
| YBL030C | PET9    | YJL212C | OPT1    | 0.8581 | -0.3210 |
| YKR085C | MRPL20  | YCR071C | IMG2    | 0.8580 | 0.3773  |
| YBR225W | YBR225W | YBR137W | YBR137W | 0.8574 | 0.3083  |
| YER182W | FMP10   | YBR037C | SCO1    | 0.8573 | 0.2997  |
| YOR033C | EXO1    | YIL066C | RNR3    | 0.8572 | 0.3437  |
| YBL079W | NUP170  | YBR121C | GRS1    | 0.8570 | 0.5167  |
| YGL035C | MIG1    | YMR046C | YMR046C | 0.8566 | -0.3480 |
| YOR371C | GPB1    | YIL046W | MET30   | 0.8565 | 0.5163  |

|         |         |           |         |        |         |
|---------|---------|-----------|---------|--------|---------|
| YDR134C | YDR134C | YCR041W   | YCR041W | 0.8563 | 0.4039  |
| YLR464W | YLR464W | YPL016W   | SWI1    | 0.8563 | 0.1956  |
| YOL062C | APM4    | YKL116C   | PRR1    | 0.8561 | 0.2500  |
| YBR196C | PGI1    | YBR222C   | PCS60   | 0.8553 | 0.2214  |
| YER022W | SRB4    | YOR033C   | EXO1    | 0.8551 | 0.2348  |
| YMR046C | YMR046C | YML091C   | RPM2    | 0.8548 | 0.4260  |
| YDR034C | LYS14   | YDR351W   | SBE2    | 0.8544 | 0.4336  |
| YOL062C | APM4    | YPL009C   | RQC2    | 0.8542 | -0.2243 |
| YBR222C | PCS60   | YER182W   | FMP10   | 0.8538 | -0.3227 |
| YKL116C | PRR1    | YGR158C   | MTR3    | 0.8535 | 0.3225  |
| YGL053W | PRM8    | YFL016C   | MDJ1    | 0.8531 | 0.2099  |
| YAL051W | OAF1    | YGR258C   | RAD2    | 0.8522 | 0.2496  |
| YER019W | ISC1    | YNL046W   | YNL046W | 0.8522 | 0.3533  |
| YER035W | EDC2    | YHR034C   | PIH1    | 0.8516 | 0.2920  |
| YJL178C | ATG27   | YNL024C   | EFM6    | 0.8516 | 0.4091  |
| YIL082W | Unknown | YGR006W   | PRP18   | 0.8501 | -0.2296 |
| YBR037C | SCO1    | YGL208W   | SIP2    | 0.8500 | 0.3450  |
| YER150W | SPI1    | YBR126C   | TPS1    | 0.8480 | 0.2718  |
| YER150W | SPI1    | YNL200C   | NNR1    | 0.8474 | 0.3333  |
| YML007W | YAP1    | YML016C   | PPZ1    | 0.8452 | 0.3824  |
| YMR112C | MED11   | YBR067C   | TIP1    | 0.8439 | -0.2030 |
| YDL002C | NHP10   | YFR011C   | MIC19   | 0.8411 | 0.2925  |
| YGR028W | MSP1    | YLR257W   | YLR257W | 0.8399 | 0.4318  |
| YDR351W | SBE2    | YLR455W   | PDP3    | 0.8387 | 0.2975  |
| YCR071C | IMG2    | YMR158W   | MRPS8   | 0.8384 | 0.2472  |
| YGR207C | CIR1    | YHR029C   | YHI9    | 0.8383 | 0.1972  |
| YOR117W | RPT5    | YIL142W   | CCT2    | 0.8381 | 0.1617  |
| YLR237W | THI7    | YJL212C   | OPT1    | 0.8373 | 0.3079  |
| YDR497C | ITR1    | YER026C   | CHO1    | 0.8339 | 0.2062  |
| YJL187C | SWE1    | YKL092C   | BUD2    | 0.8338 | 0.4908  |
| YGL193C | YGL193C | YGL226C-A | OST5    | 0.8331 | 0.1783  |
| YHR039C | MSC7    | YEL058W   | PCM1    | 0.8330 | 0.1613  |
| YGL017W | ATE1    | YBR067C   | TIP1    | 0.8321 | 0.1596  |
| YHR104W | GRE3    | YNL200C   | NNR1    | 0.8320 | 0.4033  |
| YLR231C | BNA5    | YJR025C   | BNA1    | 0.8319 | 0.1314  |
| YGL192W | IME4    | YBR008C   | FLR1    | 0.8314 | 0.1277  |
| YOR131C | YOR131C | YFR011C   | MIC19   | 0.8290 | 0.1847  |
| YJL126W | NIT2    | YJR068W   | RFC2    | 0.8276 | 0.0745  |
| YOR092W | ECM3    | YBR067C   | TIP1    | 0.8266 | 0.2360  |
| YCR031C | RPS14a  | YIL133C   | RPL16a  | 0.8243 | 0.3011  |
| YBR008C | FLR1    | YHR115C   | DMA1    | 0.8242 | 0.3201  |
| YML071C | COG8    | YJL036W   | SNX4    | 0.8236 | 0.2460  |
| YER150W | SPI1    | YER037W   | PHM8    | 0.8220 | 0.5472  |
| YER037W | PHM8    | YER150W   | SPI1    | 0.8206 | 0.2355  |
| YCL024W | KCC4    | YDL164C   | CDC9    | 0.8194 | 0.2251  |
| YOR088W | YOR088W | YJL030W   | MAD2    | 0.8183 | -0.2307 |
| YLR180W | SAM1    | YLL061W   | MMP1    | 0.8180 | 0.3512  |

|           |         |         |         |        |         |
|-----------|---------|---------|---------|--------|---------|
| YJL158C   | CIS3    | YNL322C | KRE1    | 0.8179 | 0.4203  |
| YNL074C   | MLF3    | YNL322C | KRE1    | 0.8174 | 0.2744  |
| YML096W   | YML096W | YFR047C | BNA6    | 0.8172 | -0.2679 |
| YNL124W   | NAF1    | YGL176C | YGL176C | 0.8171 | 0.4122  |
| YEL020W-A | TIM9    | YJL208C | NUC1    | 0.8165 | 0.3091  |
| YNL024C   | EFM6    | YJL178C | ATG27   | 0.8162 | 0.2736  |
| YLL061W   | MMP1    | YLR180W | SAM1    | 0.8139 | 0.2144  |
| YBR077C   | SLM4    | YBR008C | FLR1    | 0.8133 | 0.1860  |
| YBR229C   | ROT2    | YBL017C | PEP1    | 0.8128 | 0.1871  |
| YGL226C-A | OST5    | YGL193C | YGL193C | 0.8122 | 0.3497  |
| YEL064C   | AVT2    | YIL066C | RNR3    | 0.8119 | 0.1470  |
| YGL017W   | ATE1    | YIL112W | HOS4    | 0.8104 | 0.2896  |
| YLR176C   | RFX1    | YNL138W | SRV2    | 0.8104 | 0.2530  |
| YKR080W   | MTD1    | YML016C | PPZ1    | 0.8099 | 0.2169  |
| YHR027C   | RPN1    | YHR050W | SMF2    | 0.8097 | 0.2578  |
| YEL020W-A | TIM9    | YKR085C | MRPL20  | 0.8094 | 0.2575  |
| YBR163W   | EXO5    | YBR168W | PEX32   | 0.8091 | 0.5054  |
| YDL171C   | GLT1    | YOR051C | ETT1    | 0.8090 | 0.2372  |
| YJR086W   | STE18   | YJR088C | EMC2    | 0.8085 | 0.2640  |
| YDL097C   | RPN6    | YDL132W | CDC53   | 0.8083 | 0.3605  |
| YHR039C   | MSC7    | YNL280C | ERG24   | 0.8083 | 0.2413  |
| YOR196C   | LIP5    | YFL018C | LPD1    | 0.8080 | 0.1984  |
| YOR127W   | RGA1    | YIL040W | APQ12   | 0.8070 | -0.2871 |
| YBL017C   | PEP1    | YBL079W | NUP170  | 0.8069 | 0.3428  |
| YGR001C   | EFM5    | YGR222W | PET54   | 0.8060 | 0.3240  |
| YKL067W   | YNK1    | YDR513W | GRX2    | 0.8058 | 0.1497  |
| YJL140W   | RPB4    | YGR207C | CIR1    | 0.8057 | 0.1634  |
| YJL171C   | TOH1    | YPL234C | VMA11   | 0.8035 | 0.2069  |
| YDR339C   | FCF1    | YFR037C | RSC8    | 0.8024 | 0.4400  |
| YDL164C   | CDC9    | YDL132W | CDC53   | 0.7999 | 0.1831  |
| YOR251C   | TUM1    | YGL195W | GCN1    | 0.7982 | 0.2253  |
| YGR258C   | RAD2    | YOR131C | YOR131C | 0.7977 | -0.3221 |
| YMR005W   | TAF4    | YML007W | YAP1    | 0.7976 | 0.2651  |
| YMR123W   | PKR1    | YNL035C | YNL035C | 0.7954 | 0.2450  |
| YGR006W   | PRP18   | YIL082W | Unknown | 0.7947 | -0.0399 |
| YER186C   | YER186C | YBR222C | PCS60   | 0.7939 | -0.2691 |
| YDL211C   | YDL211C | YDR528W | HLR1    | 0.7928 | 0.3238  |
| YOR131C   | YOR131C | YGR207C | CIR1    | 0.7928 | 0.2458  |
| YNL322C   | KRE1    | YJL158C | CIS3    | 0.7925 | 0.3069  |
| YCL009C   | ILV6    | YMR062C | ARG7    | 0.7923 | 0.1375  |
| YGR258C   | RAD2    | YLR047C | FRE8    | 0.7923 | 0.1806  |
| YOR264W   | DSE3    | YHR023W | MYO1    | 0.7919 | 0.3740  |
| YNL138W   | SRV2    | YJR040W | GEF1    | 0.7914 | 0.2476  |
| YML038C   | YMD8    | YMR010W | ANY1    | 0.7913 | 0.4206  |
| YML091C   | RPM2    | YNL135C | FPR1    | 0.7911 | -0.2539 |
| YNL200C   | NNR1    | YER150W | SPI1    | 0.7910 | 0.4473  |
| YLR330W   | CHS5    | YMR115W | MGR3    | 0.7901 | 0.2113  |



|           |         |         |         |        |         |
|-----------|---------|---------|---------|--------|---------|
| YPL031C   | PHO85   | YFL018C | LPD1    | 0.7901 | 0.2170  |
| YGR207C   | CIR1    | YGL226W | MTC3    | 0.7897 | 0.2988  |
| YPL001W   | HAT1    | YDR383C | NKP1    | 0.7889 | 0.2586  |
| YBR147W   | RTC2    | YDR058C | TGL2    | 0.7880 | 0.5201  |
| YGL226C-A | OST5    | YOR103C | OST2    | 0.7880 | 0.2939  |
| YAL009W   | SPO7    | YML071C | COG8    | 0.7877 | -0.1818 |
| YGL207W   | SPT16   | YLR449W | FPR4    | 0.7872 | 0.1438  |
| YBR037C   | SCO1    | YNR036C | MRPS12  | 0.7868 | 0.2772  |
| YJL051W   | IRC8    | YAR028W | YAR028W | 0.7861 | -0.1994 |
| YHR027C   | RPN1    | YGL207W | SPT16   | 0.7847 | 0.2271  |
| YPL058C   | PDR12   | YEL058W | PCM1    | 0.7845 | 0.1938  |
| YDR528W   | HLR1    | YOR131C | YOR131C | 0.7844 | -0.2432 |
| YDL164C   | CDC9    | YDR180W | SCC2    | 0.7834 | 0.2945  |
| YBL105C   | PKC1    | YBL089W | AVT5    | 0.7819 | 0.2754  |
| YER088C   | DOT6    | YOR092W | ECM3    | 0.7801 | 0.2934  |
| YML091C   | RPM2    | YDL155W | CLB3    | 0.7800 | 0.3042  |
| YIL061C   | SNP1    | YJR074W | MOG1    | 0.7790 | -0.2423 |
| YOL147C   | PEX11   | YBR137W | YBR137W | 0.7787 | 0.1069  |
| YNL041C   | COG6    | YDR351W | SBE2    | 0.7786 | 0.1788  |
| YIL166C   | YIL166C | YHL007C | STE20   | 0.7784 | -0.2628 |
| YMR115W   | MGR3    | YMR067C | UBX4    | 0.7771 | 0.2289  |
| YBR061C   | TRM7    | YBR154C | RPB5    | 0.7764 | 0.0702  |
| YDR515W   | SLF1    | YDL217C | TIM22   | 0.7763 | 0.2593  |
| YOR088W   | YOR088W | YHR016C | YSC84   | 0.7755 | 0.2376  |
| YJR073C   | OPI3    | YER023W | PRO3    | 0.7754 | 0.2901  |
| YCL024W   | KCC4    | YPL016W | SWI1    | 0.7748 | 0.3531  |
| YGR012W   | MCY1    | YDL164C | CDC9    | 0.7741 | 0.1791  |
| YFL056C   | AAD6    | YDR531W | CAB1    | 0.7738 | 0.1678  |
| YJR056C   | YJR056C | YGR152C | RSR1    | 0.7725 | 0.2398  |
| YMR067C   | UBX4    | YMR115W | MGR3    | 0.7706 | 0.3796  |
| YIL043C   | CBR1    | YGL178W | MPT5    | 0.7688 | -0.2543 |
| YOL026C   | MIM1    | YNL041C | COG6    | 0.7685 | 0.2464  |
| YMR123W   | PKR1    | YJL183W | MNN11   | 0.7676 | 0.2111  |
| YBR229C   | ROT2    | YBL014C | RRN6    | 0.7674 | 0.2063  |
| YJR008W   | MHO1    | YML110C | COQ5    | 0.7662 | 0.3407  |
| YLR435W   | TSR2    | YKL021C | MAK11   | 0.7662 | 0.3348  |
| YIL082W   | Unknown | YLR452C | SST2    | 0.7660 | 0.1487  |
| YEL076W-C | Unknown | YLR206W | ENT2    | 0.7659 | -0.1983 |
| YMR158W   | MRPS8   | YDR515W | SLF1    | 0.7652 | 0.3256  |
| YJL183W   | MNN11   | YOR054C | VHS3    | 0.7649 | -0.4360 |
| YLR059C   | REX2    | YKL184W | SPE1    | 0.7645 | -0.1177 |
| YKL073W   | LHS1    | YDR528W | HLR1    | 0.7640 | 0.1418  |
| YBL020W   | RFT1    | YIL111W | COX5b   | 0.7634 | -0.1347 |
| YIL119C   | RPI1    | YMR209C | YMR209C | 0.7634 | 0.1453  |
| YML072C   | TCB3    | YNL321W | VNX1    | 0.7627 | 0.2340  |
| YER023W   | PRO3    | YJR088C | EMC2    | 0.7621 | 0.3689  |
| YFL047W   | RGD2    | YLR046C | YLR046C | 0.7621 | -0.1656 |

|         |         |           |           |        |         |
|---------|---------|-----------|-----------|--------|---------|
| YPL147W | PXA1    | YHL007C   | STE20     | 0.7612 | -0.1698 |
| YBR061C | TRM7    | YBR087W   | RFC5      | 0.7602 | 0.3332  |
| YEL058W | PCM1    | YHR209W   | CRG1      | 0.7596 | 0.1989  |
| YJL208C | NUC1    | YEL020W-A | TIM9      | 0.7586 | 0.3004  |
| YBR239C | ERT1    | YBR249C   | ARO4      | 0.7584 | 0.0980  |
| YHR209W | CRG1    | YJL149W   | DAS1      | 0.7577 | 0.2219  |
| YPL234C | VMA11   | YJL171C   | TOH1      | 0.7573 | 0.3229  |
| YLR057W | MNL2    | YLR096W   | KIN2      | 0.7571 | 0.2235  |
| YLL038C | ENT4    | YGL192W   | IME4      | 0.7568 | 0.1026  |
| YDR524C | AGE1    | YER116C   | SLX8      | 0.7562 | -0.2322 |
| YLR181C | VTA1    | YDR180W   | SCC2      | 0.7562 | 0.2785  |
| YDL171C | GLT1    | YGL242C   | YGL242C   | 0.7558 | -0.2271 |
| YML091C | RPM2    | YBL030C   | PET9      | 0.7557 | 0.2258  |
| YCR031C | RPS14a  | YDL155W   | CLB3      | 0.7553 | -0.2073 |
| YOR043W | WHI2    | YJR056C   | YJR056C   | 0.7553 | 0.1913  |
| YBL105C | PKC1    | YBL017C   | PEP1      | 0.7552 | 0.1966  |
| YCL009C | ILV6    | YBR249C   | ARO4      | 0.7552 | 0.1831  |
| YPR022C | SDD4    | YML016C   | PPZ1      | 0.7550 | 0.1266  |
| YOR088W | YOR088W | YJR040W   | GEF1      | 0.7546 | 0.2400  |
| YJL058C | BIT61   | YER185W   | PUG1      | 0.7545 | 0.2383  |
| YKL019W | RAM2    | YNL329C   | PEX6      | 0.7541 | 0.1488  |
| YHL007C | STE20   | YPL147W   | PXA1      | 0.7539 | -0.2115 |
| YJL058C | BIT61   | YOL089C   | HAL9      | 0.7537 | 0.2410  |
| YEL058W | PCM1    | YOL130W   | ALR1      | 0.7535 | 0.2396  |
| YMR046C | YMR046C | YIL015C-A | YIL015C-A | 0.7530 | 0.3248  |
| YHL048W | COS8    | YHR209W   | CRG1      | 0.7525 | 0.2305  |
| YBL079W | NUP170  | YBL014C   | RRN6      | 0.7498 | 0.3320  |
| YHR209W | CRG1    | YHL048W   | COS8      | 0.7487 | 0.2137  |
| YML016C | PPZ1    | YML007W   | YAP1      | 0.7483 | 0.2180  |
| YHR029C | YHI9    | YBR249C   | ARO4      | 0.7482 | 0.2605  |
| YPL009C | RQC2    | YOL062C   | APM4      | 0.7475 | -0.1600 |
| YDR441C | APT2    | YNL138W   | SRV2      | 0.7471 | -0.1776 |
| YNR034W | SOL1    | YML098W   | TAF13     | 0.7471 | 0.2825  |
| YJL118W | YJL118W | YGR023W   | MTL1      | 0.7465 | -0.2540 |
| YNL034W | YNL034W | YDL047W   | SIT4      | 0.7463 | 0.1471  |
| YJR040W | GEF1    | YHR050W   | SMF2      | 0.7450 | 0.2361  |
| YMR158W | MRPS8   | YCR071C   | IMG2      | 0.7450 | 0.2646  |
| YDR144C | MKC7    | YIL119C   | RPI1      | 0.7448 | -0.3355 |
| YDR515W | SLF1    | YER037W   | PHM8      | 0.7446 | -0.1344 |
| YJR068W | RFC2    | YJL030W   | MAD2      | 0.7443 | 0.2803  |
| YLR237W | THI7    | YLR180W   | SAM1      | 0.7443 | 0.2122  |
| YBR239C | ERT1    | YBL030C   | PET9      | 0.7417 | 0.2852  |
| YMR152W | YIM1    | YKL067W   | YNK1      | 0.7410 | 0.2244  |
| YER019W | ISC1    | YNL322C   | KRE1      | 0.7386 | 0.0619  |
| YGR208W | SER2    | YKR080W   | MTD1      | 0.7385 | 0.1927  |
| YDR180W | SCC2    | YGR184C   | UBR1      | 0.7382 | 0.2783  |
| YLR452C | SST2    | YIL158W   | AIM20     | 0.7377 | -0.2455 |

|           |         |         |         |        |         |
|-----------|---------|---------|---------|--------|---------|
| YIL165C   | YIL165C | YDL180W | YDL180W | 0.7375 | 0.2433  |
| YHR027C   | RPN1    | YPL234C | VMA11   | 0.7373 | 0.2895  |
| YLR342W   | FKS1    | YJL158C | CIS3    | 0.7371 | 0.1931  |
| YKR085C   | MRPL20  | YNR036C | MRPS12  | 0.7369 | 0.1767  |
| YEL020W-A | TIM9    | YER186C | YER186C | 0.7368 | 0.3740  |
| YER023W   | PRO3    | YEL058W | PCM1    | 0.7368 | 0.3413  |
| YIL046W   | MET30   | YGR168C | YGR168C | 0.7366 | -0.1882 |
| YAL009W   | SPO7    | YKL160W | ELF1    | 0.7362 | 0.2039  |
| YBR137W   | YBR137W | YNL022C | RCM1    | 0.7361 | -0.2962 |
| YNL242W   | ATG2    | YAL056W | GPB2    | 0.7358 | 0.2246  |
| YLL061W   | MMP1    | YJL212C | OPT1    | 0.7357 | 0.3066  |
| YHR104W   | GRE3    | YGR194C | XKS1    | 0.7354 | 0.3871  |
| YKL073W   | LHS1    | YML079W | YML079W | 0.7345 | 0.2287  |
| YOR196C   | LIP5    | YGR012W | MCY1    | 0.7343 | 0.2608  |
| YNR036C   | MRPS12  | YBR037C | SCO1    | 0.7339 | 0.2608  |
| YBR147W   | RTC2    | YMR062C | ARG7    | 0.7332 | 0.3128  |
| YML079W   | YML079W | YPL058C | PDR12   | 0.7329 | -0.2427 |
| YJR073C   | OPI3    | YLR172C | DPH5    | 0.7324 | 0.2061  |
| YFL016C   | MDJ1    | YHL007C | STE20   | 0.7318 | 0.2042  |
| YOL130W   | ALR1    | YDR441C | APT2    | 0.7318 | 0.2883  |
| YJL171C   | TOH1    | YER037W | PHM8    | 0.7314 | 0.2357  |
| YHR209W   | CRG1    | YPL147W | PXA1    | 0.7313 | 0.2489  |
| YPL144W   | POC4    | YPL031C | PHO85   | 0.7313 | 0.1757  |
| YHR016C   | YSC84   | YML110C | COQ5    | 0.7295 | 0.2138  |
| YNL138W   | SRV2    | YLR176C | RFX1    | 0.7284 | 0.2045  |
| YGR194C   | XKS1    | YHR016C | YSC84   | 0.7278 | 0.2222  |
| YOR264W   | DSE3    | YNL326C | PFA3    | 0.7278 | 0.3181  |
| YKL110C   | KTI12   | YLR047C | FRE8    | 0.7265 | -0.3308 |
| YOR131C   | YOR131C | YML013W | UBX2    | 0.7262 | -0.2232 |
| YKL073W   | LHS1    | YMR112C | MED11   | 0.7258 | 0.3299  |
| YER046W   | SPO73   | YBR008C | FLR1    | 0.7255 | -0.2047 |
| YMR158W   | MRPS8   | YGR028W | MSP1    | 0.7253 | 0.3467  |
| YMR209C   | YMR209C | YDL150W | RPC53   | 0.7249 | 0.1485  |
| YDL147W   | RPN5    | YFR004W | RPN11   | 0.7245 | 0.3425  |
| YPL071C   | YPL071C | YMR123W | PKR1    | 0.7244 | -0.1852 |
| YIL171W   | YIL171W | YGR289C | MAL11   | 0.7242 | 0.2241  |
| YFL047W   | RGD2    | YIL119C | RPI1    | 0.7239 | 0.0867  |
| YBL030C   | PET9    | YGL017W | ATE1    | 0.7228 | -0.1335 |
| YPL226W   | NEW1    | YMR215W | GAS3    | 0.7226 | 0.2751  |
| YER088C   | DOT6    | YGR158C | MTR3    | 0.7224 | -0.2586 |
| YBR071W   | YBR071W | YIL171W | YIL171W | 0.7212 | -0.3180 |
| YBR157C   | ICS2    | YLR248W | RCK2    | 0.7210 | 0.1884  |
| YPL064C   | CWC27   | YPL234C | VMA11   | 0.7208 | 0.1966  |
| YKL092C   | BUD2    | YER022W | SRB4    | 0.7206 | 0.2621  |
| YNL322C   | KRE1    | YCL009C | ILV6    | 0.7195 | 0.2331  |
| YOL062C   | APM4    | YOL092W | YPQ1    | 0.7194 | -0.1913 |
| YLR248W   | RCK2    | YLR443W | ECM7    | 0.7192 | 0.2899  |

|         |         |         |         |        |         |
|---------|---------|---------|---------|--------|---------|
| YBL007C | SLA1    | YBR225W | YBR225W | 0.7189 | 0.2894  |
| YDR064W | RPS13   | YCR031C | RPS14a  | 0.7185 | 0.2025  |
| YPL071C | YPL071C | YDL047W | SIT4    | 0.7185 | -0.1441 |
| YPL064C | CWC27   | YOR092W | ECM3    | 0.7180 | -0.1857 |
| YLR056W | ERG3    | YNL124W | NAF1    | 0.7175 | 0.2866  |
| YLR059C | REX2    | YHR023W | MYO1    | 0.7174 | -0.2092 |
| YDL155W | CLB3    | YGR222W | PET54   | 0.7172 | 0.2034  |
| YOR117W | RPT5    | YGR209C | TRX2    | 0.7169 | 0.2616  |
| YOR033C | EXO1    | YLR368W | MDM30   | 0.7167 | 0.3625  |
| YML016C | PPZ1    | YGL257C | MNT2    | 0.7164 | 0.1445  |
| YGL242C | YGL242C | YJR088C | EMC2    | 0.7161 | 0.1741  |
| YBR249C | ARO4    | YBR239C | ERT1    | 0.7150 | 0.3769  |
| YMR010W | ANY1    | YML038C | YMD8    | 0.7150 | 0.4639  |
| YBR196C | PGI1    | YER035W | EDC2    | 0.7149 | -0.2122 |
| YLR430W | SEN1    | YDL164C | CDC9    | 0.7147 | 0.1233  |
| YGR150C | CCM1    | YOL092W | YPQ1    | 0.7133 | -0.1964 |
| YBR193C | MED8    | YBL105C | PKC1    | 0.7132 | 0.1416  |
| YJL126W | NIT2    | YHR209W | CRG1    | 0.7131 | 0.1453  |
| YJL158C | CIS3    | YLR342W | FKS1    | 0.7125 | 0.2883  |
| YDR441C | APT2    | YHR115C | DMA1    | 0.7118 | 0.2099  |
| YKL096W | CWP1    | YNR036C | MRPS12  | 0.7113 | 0.1703  |
| YBR229C | ROT2    | YBL089W | AVT5    | 0.7112 | 0.4006  |
| YFL018C | LPD1    | YMR046C | YMR046C | 0.7110 | -0.1897 |
| YLR442C | SIR3    | YJL204C | RCY1    | 0.7105 | 0.2977  |
| YMR158W | MRPS8   | YKR085C | MRPL20  | 0.7104 | 0.1319  |
| YGL051W | MST27   | YCR041W | YCR041W | 0.7103 | 0.1411  |
| YJR088C | EMC2    | YGL017W | ATE1    | 0.7101 | -0.2910 |
| YML007W | YAP1    | YMR005W | TAF4    | 0.7101 | 0.2337  |
| YDL047W | SIT4    | YNL034W | YNL034W | 0.7093 | 0.1919  |
| YGL178W | MPT5    | YGL051W | MST27   | 0.7092 | -0.2408 |
| YKL092C | BUD2    | YOL018C | TLG2    | 0.7090 | 0.1276  |
| YBL030C | PET9    | YGL192W | IME4    | 0.7088 | 0.2430  |
| YER150W | SPI1    | YDR321W | ASP1    | 0.7087 | -0.3207 |
| YDL133W | SRF1    | YGL176C | YGL176C | 0.7082 | 0.1336  |
| YHR034C | PIH1    | YDR319C | YFT2    | 0.7080 | 0.2341  |
| YEL058W | PCM1    | YOL062C | APM4    | 0.7079 | 0.1997  |
| YJR032W | CPR7    | YML110C | COQ5    | 0.7075 | 0.2721  |
| YIL066C | RNR3    | YOR033C | EXO1    | 0.7070 | 0.2086  |
| YEL056W | HAT2    | YCR071C | IMG2    | 0.7065 | -0.1954 |
| YLR342W | FKS1    | YIL061C | SNP1    | 0.7059 | -0.3171 |
| YJR088C | EMC2    | YBR196C | PGI1    | 0.7055 | 0.2698  |
| YKL184W | SPE1    | YDR497C | ITR1    | 0.7055 | -0.1843 |
| YMR067C | UBX4    | YHR027C | RPN1    | 0.7038 | 0.2533  |
| YBL089W | AVT5    | YBL105C | PKC1    | 0.7036 | 0.1885  |
| YFL018C | LPD1    | YDR178W | SDH4    | 0.7036 | 0.0364  |
| YGL193C | YGL193C | YMR067C | UBX4    | 0.7033 | -0.1302 |
| YDL150W | RPC53   | YGR289C | MAL11   | 0.7025 | -0.4580 |

|           |         |           |         |        |         |
|-----------|---------|-----------|---------|--------|---------|
| YIL066C   | RNR3    | YEL064C   | AVT2    | 0.7023 | 0.1759  |
| YKL096W   | CWP1    | YGR222W   | PET54   | 0.7020 | 0.1464  |
| YOL043C   | NTG2    | YOL018C   | TLG2    | 0.7019 | 0.2352  |
| YNL280C   | ERG24   | YPL183C   | RTT10   | 0.7014 | 0.2640  |
| YIL061C   | SNP1    | YDL171C   | GLT1    | 0.7010 | 0.1968  |
| YCR031C   | RPS14a  | YLR389C   | STE23   | 0.7009 | 0.1974  |
| YEL020W-A | TIM9    | YMR158W   | MRPS8   | 0.7008 | 0.2369  |
| YDL111C   | RRP42   | YKL096W   | CWP1    | 0.7005 | 0.2245  |
| YKL160W   | ELF1    | YGR207C   | CIR1    | 0.7003 | 0.0574  |
| YLR443W   | ECM7    | YLR248W   | RCK2    | 0.7001 | 0.1928  |
| YML079W   | YML079W | YEL020W-A | TIM9    | 0.6996 | 0.1706  |
| YDR339C   | FCF1    | YDL002C   | NHP10   | 0.6991 | 0.2711  |
| YMR112C   | MED11   | YDR383C   | NKP1    | 0.6986 | 0.1755  |
| YDL135C   | RDI1    | YDL147W   | RPN5    | 0.6983 | 0.1462  |
| YOL094C   | RFC4    | YGR023W   | MTL1    | 0.6981 | -0.3513 |
| YOR092W   | ECM3    | YPL064C   | CWC27   | 0.6981 | -0.1556 |
| YBR161W   | CSH1    | YBR163W   | EXO5    | 0.6973 | 0.2327  |
| YGR289C   | MAL11   | YIL171W   | YIL171W | 0.6970 | 0.3557  |
| YHR209W   | CRG1    | YEL058W   | PCM1    | 0.6968 | 0.1311  |
| YIL046W   | MET30   | YPL071C   | YPL071C | 0.6966 | -0.0375 |
| YOL043C   | NTG2    | YMR123W   | PKR1    | 0.6963 | -0.1930 |
| YBR121C   | GRS1    | YOR117W   | RPT5    | 0.6958 | 0.3100  |
| YNL024C   | EFM6    | YLL035W   | GRC3    | 0.6954 | 0.1724  |
| YLR375W   | STP3    | YER035W   | EDC2    | 0.6952 | 0.2722  |
| YBL014C   | RRN6    | YBR163W   | EXO5    | 0.6949 | 0.1824  |
| YLR455W   | PDP3    | YFR037C   | RSC8    | 0.6942 | 0.1053  |
| YIR026C   | YVH1    | YER049W   | TPA1    | 0.6931 | 0.2639  |
| YMR215W   | GAS3    | YML072C   | TCB3    | 0.6930 | 0.2828  |
| YDL047W   | SIT4    | YKL116C   | PRR1    | 0.6911 | 0.2875  |
| YOL092W   | YPQ1    | YIL040W   | APQ12   | 0.6911 | 0.2517  |
| YJR088C   | EMC2    | YER144C   | UBP5    | 0.6907 | -0.3289 |
| YGR207C   | CIR1    | YOR196C   | LIP5    | 0.6903 | 0.2659  |
| YGR207C   | CIR1    | YDR058C   | TGL2    | 0.6898 | 0.2438  |
| YNL242W   | ATG2    | YNL124W   | NAF1    | 0.6892 | 0.1430  |
| YBR157C   | ICS2    | YER046W   | SPO73   | 0.6890 | -0.1050 |
| YHR023W   | MYO1    | YDL111C   | RRP42   | 0.6890 | -0.2005 |
| YJL171C   | TOH1    | YGL178W   | MPT5    | 0.6884 | 0.2106  |
| YEL064C   | AVT2    | YDL211C   | YDL211C | 0.6879 | 0.1065  |
| YBR168W   | PEX32   | YBR137W   | YBR137W | 0.6878 | 0.1551  |
| YLR248W   | RCK2    | YGL169W   | SUA5    | 0.6874 | -0.3496 |
| YML036W   | CGI121  | YML013W   | UBX2    | 0.6874 | 0.2111  |
| YGR028W   | MSP1    | YMR158W   | MRPS8   | 0.6868 | 0.2241  |
| YIL066C   | RNR3    | YGR209C   | TRX2    | 0.6868 | 0.1875  |
| YAL009W   | SPO7    | YIL171W   | YIL171W | 0.6865 | -0.1515 |
| YBR126C   | TPS1    | YBR137W   | YBR137W | 0.6860 | 0.3115  |
| YEL068C   | YEL068C | YBR067C   | TIP1    | 0.6857 | 0.1372  |
| YHR039C   | MSC7    | YLR056W   | ERG3    | 0.6856 | 0.2388  |

|         |         |           |         |        |         |
|---------|---------|-----------|---------|--------|---------|
| YOL147C | PEX11   | YEL058W   | PCM1    | 0.6854 | 0.1947  |
| YJR108W | ABM1    | YOR088W   | YOR088W | 0.6852 | 0.2481  |
| YGL178W | MPT5    | YJL171C   | TOH1    | 0.6850 | 0.1668  |
| YJR086W | STE18   | YJR025C   | BNA1    | 0.6849 | 0.1558  |
| YMR115W | MGR3    | YJL204C   | RCY1    | 0.6848 | 0.1290  |
| YEL064C | AVT2    | YPL071C   | YPL071C | 0.6842 | 0.2244  |
| YDR367W | KEI1    | YER144C   | UBP5    | 0.6837 | -0.1088 |
| YNL135C | FPR1    | YOR117W   | RPT5    | 0.6834 | 0.0990  |
| YMR158W | MRPS8   | YGR150C   | CCM1    | 0.6829 | 0.0520  |
| YJR040W | GEF1    | YOR088W   | YOR088W | 0.6824 | 0.1949  |
| YDL180W | YDL180W | YGL193C   | YGL193C | 0.6808 | 0.2250  |
| YDR513W | GRX2    | YKL067W   | YNK1    | 0.6808 | 0.2166  |
| YJR097W | JJJ3    | YDR530C   | APA2    | 0.6805 | -0.1697 |
| YLR206W | ENT2    | YOL018C   | TLG2    | 0.6803 | 0.2390  |
| YER182W | FMP10   | YNR036C   | MRPS12  | 0.6800 | 0.1834  |
| YNL074C | MLF3    | YOR101W   | RAS1    | 0.6799 | -0.2373 |
| YKL116C | PRR1    | YOL062C   | APM4    | 0.6793 | 0.2321  |
| YNL138W | SRV2    | YDL132W   | CDC53   | 0.6792 | 0.2053  |
| YBL105C | PKC1    | YBL020W   | RFT1    | 0.6791 | 0.2372  |
| YNL041C | COG6    | YOL026C   | MIM1    | 0.6791 | 0.2584  |
| YCR071C | IMG2    | YJL158C   | CIS3    | 0.6790 | 0.2061  |
| YFL056C | AAD6    | YML091C   | RPM2    | 0.6789 | -0.0973 |
| YNR012W | URK1    | YNL022C   | RCM1    | 0.6787 | 0.3274  |
| YHR023W | MYO1    | YLR059C   | REX2    | 0.6784 | -0.3874 |
| YMR152W | YIM1    | YML110C   | COQ5    | 0.6778 | 0.3937  |
| YER144C | UBP5    | YGR149W   | GPC1    | 0.6777 | 0.0770  |
| YBR239C | ERT1    | YBR154C   | RPB5    | 0.6765 | 0.1892  |
| YAL009W | SPO7    | YER182W   | FMP10   | 0.6763 | 0.0967  |
| YGR222W | PET54   | YNL024C   | EFM6    | 0.6762 | 0.1377  |
| YNL322C | KRE1    | YOR264W   | DSE3    | 0.6754 | -0.0701 |
| YAL009W | SPO7    | YOR389W   | YOR389W | 0.6749 | -0.0994 |
| YHR023W | MYO1    | YPL009C   | RQC2    | 0.6740 | 0.1841  |
| YER186C | YER186C | YEL020W-A | TIM9    | 0.6739 | 0.1954  |
| YGR211W | ZPR1    | YOR033C   | EXO1    | 0.6739 | 0.3958  |
| YGR184C | UBR1    | YJR103W   | URA8    | 0.6738 | 0.2814  |
| YOR264W | DSE3    | YJR073C   | OPI3    | 0.6737 | -0.2216 |
| YDL002C | NHP10   | YDR515W   | SLF1    | 0.6734 | 0.2731  |
| YJL204C | RCY1    | YMR067C   | UBX4    | 0.6730 | 0.2363  |
| YBR239C | ERT1    | YOR264W   | DSE3    | 0.6729 | -0.2136 |
| YIL066C | RNR3    | YCR083W   | TRX3    | 0.6726 | 0.0927  |
| YLR059C | REX2    | YER116C   | SLX8    | 0.6723 | 0.2553  |
| YIR028W | DAL4    | YNL278W   | CAF120  | 0.6719 | 0.2230  |
| YNL024C | EFM6    | YNL046W   | YNL046W | 0.6717 | 0.1927  |
| YGL195W | GCN1    | YBL007C   | SLA1    | 0.6710 | 0.2563  |
| YDR383C | NKP1    | YOR131C   | YOR131C | 0.6707 | 0.1939  |
| YEL021W | URA3    | YOR092W   | ECM3    | 0.6707 | -0.0307 |
| YJL149W | DAS1    | YHR209W   | CRG1    | 0.6706 | 0.1788  |

|           |         |         |         |        |         |
|-----------|---------|---------|---------|--------|---------|
| YNL124W   | NAF1    | YFR042W | KEG1    | 0.6706 | -0.3412 |
| YEL076W-C | Unknown | YDL171C | GLT1    | 0.6703 | 0.1237  |
| YNL322C   | KRE1    | YNL074C | MLF3    | 0.6696 | 0.2734  |
| YLR231C   | BNA5    | YIL119C | RPI1    | 0.6691 | 0.1248  |
| YDL097C   | RPN6    | YIL040W | APQ12   | 0.6690 | 0.3131  |
| YMR152W   | YIM1    | YKL110C | KTI12   | 0.6682 | -0.1727 |
| YPL237W   | SUI3    | YOL097C | WRS1    | 0.6679 | 0.3638  |
| YDR178W   | SDH4    | YOR142W | LSC1    | 0.6677 | 0.4261  |
| YPL147W   | PXA1    | YGR006W | PRP18   | 0.6677 | 0.2064  |
| YHR050W   | SMF2    | YHR027C | RPN1    | 0.6675 | 0.0781  |
| YDL103C   | QRI1    | YBL089W | AVT5    | 0.6669 | -0.2625 |
| YBR154C   | RPB5    | YOL093W | TRM10   | 0.6662 | 0.3150  |
| YIL046W   | MET30   | YGL176C | YGL176C | 0.6660 | -0.2128 |
| YCL024W   | KCC4    | YOR144C | ELG1    | 0.6651 | 0.2400  |
| YBR126C   | TPS1    | YHR104W | GRE3    | 0.6650 | 0.2037  |
| YBR067C   | TIP1    | YOL026C | MIM1    | 0.6643 | 0.1716  |
| YDR528W   | HLR1    | YPL071C | YPL071C | 0.6643 | 0.1452  |
| YGL195W   | GCN1    | YHR027C | RPN1    | 0.6642 | 0.2738  |
| YGL192W   | IME4    | YLL038C | ENT4    | 0.6640 | 0.3058  |
| YPL058C   | PDR12   | YKR075C | YKR075C | 0.6633 | 0.0222  |
| YMR010W   | ANY1    | YML048W | GSF2    | 0.6630 | 0.2460  |
| YGL053W   | PRM8    | YIL082W | Unknown | 0.6627 | 0.1322  |
| YKL092C   | BUD2    | YML091C | RPM2    | 0.6627 | -0.1689 |
| YNR034W   | SOL1    | YAR028W | YAR028W | 0.6627 | -0.1398 |
| YOL018C   | TLG2    | YGR152C | RSR1    | 0.6622 | 0.2105  |
| YBR061C   | TRM7    | YBL014C | RRN6    | 0.6619 | 0.3110  |
| YFR004W   | RPN11   | YDR528W | HLR1    | 0.6618 | 0.2017  |
| YKL160W   | ELF1    | YJL140W | RPB4    | 0.6617 | 0.2797  |
| YER150W   | SPI1    | YOL153C | YOL153C | 0.6613 | 0.1838  |
| YDL047W   | SIT4    | YJL183W | MNN11   | 0.6610 | 0.1544  |
| YER037W   | PHM8    | YJR074W | MOG1    | 0.6610 | 0.2008  |
| YML091C   | RPM2    | YFL018C | LPD1    | 0.6609 | 0.1738  |
| YOR127W   | RGA1    | YGL257C | MNT2    | 0.6597 | 0.1126  |
| YKR080W   | MTD1    | YML098W | TAF13   | 0.6596 | 0.1230  |
| YNL024C   | EFM6    | YOR251C | TUM1    | 0.6590 | 0.0356  |
| YOR264W   | DSE3    | YGL035C | MIG1    | 0.6586 | 0.2421  |
| YHR016C   | YSC84   | YOL153C | YOL153C | 0.6583 | 0.2584  |
| YGR288W   | MAL13   | YDR034C | LYS14   | 0.6582 | 0.2823  |
| YCL018W   | LEU2    | YHR209W | CRG1    | 0.6580 | 0.1587  |
| YAR028W   | YAR028W | YGL051W | MST27   | 0.6579 | 0.1500  |
| YER088C   | DOT6    | YLR172C | DPH5    | 0.6579 | -0.0445 |
| YDL147W   | RPN5    | YDL133W | SRF1    | 0.6578 | 0.3890  |
| YBR196C   | PGI1    | YJL171C | TOH1    | 0.6576 | 0.1459  |
| YDR058C   | TGL2    | YOR080W | DIA2    | 0.6575 | 0.1445  |
| YDR524C   | AGE1    | YDL047W | SIT4    | 0.6574 | 0.1290  |
| YDL135C   | RDI1    | YOR051C | ETT1    | 0.6572 | 0.1883  |
| YPL147W   | PXA1    | YIL165C | YIL165C | 0.6571 | -0.0200 |

|           |         |         |         |        |         |
|-----------|---------|---------|---------|--------|---------|
| YGR207C   | CIR1    | YKL160W | ELF1    | 0.6568 | 0.1877  |
| YDR319C   | YFT2    | YGL025C | PGD1    | 0.6567 | 0.1729  |
| YML013W   | UBX2    | YML036W | CGI121  | 0.6564 | 0.3624  |
| YGR168C   | YGR168C | YIL046W | MET30   | 0.6563 | -0.0767 |
| YOR371C   | GPB1    | YGR012W | MCY1    | 0.6563 | 0.3522  |
| YER037W   | PHM8    | YML121W | GTR1    | 0.6558 | 0.2528  |
| YFL047W   | RGD2    | YJR086W | STE18   | 0.6557 | 0.0894  |
| YGL226C-A | OST5    | YIL040W | APQ12   | 0.6557 | 0.0792  |
| YJL036W   | SNX4    | YKL073W | LHS1    | 0.6554 | 0.1713  |
| YKL073W   | LHS1    | YDL132W | CDC53   | 0.6550 | 0.2263  |
| YJR103W   | URA8    | YPL147W | PXA1    | 0.6548 | 0.2444  |
| YLR443W   | ECM7    | YOR054C | VHS3    | 0.6548 | 0.1629  |
| YDR351W   | SBE2    | YFL056C | AAD6    | 0.6546 | 0.1910  |
| YDL002C   | NHP10   | YER022W | SRB4    | 0.6545 | 0.1534  |
| YKR075C   | YKR075C | YPL058C | PDR12   | 0.6543 | 0.1511  |
| YBR037C   | SCO1    | YGR150C | CCM1    | 0.6540 | 0.3712  |
| YGR023W   | MTL1    | YBR229C | ROT2    | 0.6538 | 0.1480  |
| YGL226C-A | OST5    | YOL026C | MIM1    | 0.6535 | 0.2936  |
| YIL040W   | APQ12   | YDL180W | YDL180W | 0.6534 | 0.1467  |
| YLR047C   | FRE8    | YGR258C | RAD2    | 0.6533 | 0.1949  |
| YBR196C   | PGI1    | YBL040C | ERD2    | 0.6532 | 0.2473  |
| YIL112W   | HOS4    | YIL046W | MET30   | 0.6532 | 0.0377  |
| YER144C   | UBP5    | YOR080W | DIA2    | 0.6530 | 0.1921  |
| YBL017C   | PEP1    | YBR161W | CSH1    | 0.6529 | 0.3228  |
| YGL053W   | PRM8    | YGR258C | RAD2    | 0.6522 | 0.1322  |
| YER088C   | DOT6    | YNL321W | VNX1    | 0.6518 | 0.2752  |
| YNL074C   | MLF3    | YDL133W | SRF1    | 0.6517 | -0.2923 |
| YPL237W   | SUI3    | YLR435W | TSR2    | 0.6515 | 0.5150  |
| YPR080W   | TEF1    | YGL025C | PGD1    | 0.6512 | 0.0172  |
| YFR042W   | KEG1    | YKL110C | KTI12   | 0.6505 | 0.2995  |
| YJR108W   | ABM1    | YHR054C | YHR054C | 0.6500 | -0.1201 |
| YJR074W   | MOG1    | YKR051W | YKR051W | 0.6498 | 0.1862  |
| YMR005W   | TAF4    | YMR067C | UBX4    | 0.6492 | 0.1782  |
| YFL018C   | LPD1    | YML091C | RPM2    | 0.6491 | 0.2822  |
| YLL035W   | GRC3    | YNL024C | EFM6    | 0.6487 | 0.0987  |
| YKR075C   | YKR075C | YGL035C | MIG1    | 0.6486 | 0.0892  |
| YPL234C   | VMA11   | YOL092W | YPQ1    | 0.6484 | 0.1763  |
| YGL025C   | PGD1    | YER020W | GPA2    | 0.6483 | 0.1809  |
| YPL234C   | VMA11   | YJR032W | CPR7    | 0.6482 | 0.1850  |
| YFR004W   | RPN11   | YDL147W | RPN5    | 0.6480 | 0.0675  |
| YGR001C   | EFM5    | YMR209C | YMR209C | 0.6478 | 0.2048  |
| YML036W   | CGI121  | YDL211C | YDL211C | 0.6476 | 0.1905  |
| YIL171W   | YIL171W | YBR071W | YBR071W | 0.6473 | -0.1699 |
| YDL147W   | RPN5    | YOL088C | MPD2    | 0.6471 | 0.2248  |
| YFR042W   | KEG1    | YAL051W | OAF1    | 0.6465 | 0.1216  |
| YHR039C   | MSC7    | YMR209C | YMR209C | 0.6463 | 0.1496  |
| YER144C   | UBP5    | YHR115C | DMA1    | 0.6462 | 0.1309  |



|           |         |         |         |        |         |
|-----------|---------|---------|---------|--------|---------|
| YAL051W   | OAF1    | YOL147C | PEX11   | 0.6459 | 0.1448  |
| YFR042W   | KEG1    | YNL124W | NAF1    | 0.6458 | -0.3216 |
| YIL112W   | HOS4    | YDR351W | SBE2    | 0.6457 | 0.1991  |
| YMR209C   | YMR209C | YOL088C | MPD2    | 0.6457 | 0.1948  |
| YJL171C   | TOH1    | YBR196C | PGI1    | 0.6456 | 0.1149  |
| YBL079W   | NUP170  | YBL017C | PEP1    | 0.6453 | 0.2385  |
| YJL154C   | VPS35   | YBL014C | RRN6    | 0.6451 | 0.1371  |
| YAL056W   | GPB2    | YHR039C | MSC7    | 0.6449 | -0.0920 |
| YLR155C   | ASP3-1  | YHR054C | YHR054C | 0.6448 | 0.0640  |
| YNL124W   | NAF1    | YGR168C | YGR168C | 0.6447 | -0.2193 |
| YPL234C   | VMA11   | YJL178C | ATG27   | 0.6443 | 0.2281  |
| YFL016C   | MDJ1    | YFR013W | IOC3    | 0.6440 | 0.3159  |
| YDR383C   | NKP1    | YGR157W | CHO2    | 0.6439 | -0.1555 |
| YLR342W   | FKS1    | YJL187C | SWE1    | 0.6432 | 0.2234  |
| YLR375W   | STP3    | YDR515W | SLF1    | 0.6432 | -0.1985 |
| YBR229C   | ROT2    | YBR225W | YBR225W | 0.6431 | 0.1472  |
| YJR097W   | JJ3     | YDL180W | YDL180W | 0.6429 | -0.2307 |
| YKL067W   | YNK1    | YMR152W | YIM1    | 0.6428 | 0.0614  |
| YBR193C   | MED8    | YBR168W | PEX32   | 0.6425 | 0.1364  |
| YFR042W   | KEG1    | YKL092C | BUD2    | 0.6425 | -0.1936 |
| YFR042W   | KEG1    | YLL038C | ENT4    | 0.6423 | -0.2740 |
| YIR022W   | SEC11   | YIL043C | CBR1    | 0.6423 | 0.2883  |
| YLR059C   | REX2    | YOL130W | ALR1    | 0.6420 | 0.1579  |
| YIL133C   | RPL16a  | YDR367W | KEI1    | 0.6417 | 0.3441  |
| YDR383C   | NKP1    | YDL147W | RPN5    | 0.6416 | 0.1194  |
| YLR206W   | ENT2    | YDL217C | TIM22   | 0.6413 | -0.2319 |
| YGL226C-A | OST5    | YGR209C | TRX2    | 0.6412 | 0.1927  |
| YOR092W   | ECM3    | YMR192W | GYL1    | 0.6411 | -0.1621 |
| YBR126C   | TPS1    | YER150W | SPI1    | 0.6405 | 0.1972  |
| YGL242C   | YGL242C | YDL171C | GLT1    | 0.6402 | -0.1150 |
| YOR080W   | DIA2    | YOL081W | IRA2    | 0.6400 | 0.0059  |
| YPL183C   | RTT10   | YLR287C | YLR287C | 0.6400 | 0.3935  |
| YML121W   | GTR1    | YML016C | PPZ1    | 0.6398 | 0.2980  |
| YPL071C   | YPL071C | YGL178W | MPT5    | 0.6390 | -0.2048 |
| YBL079W   | NUP170  | YBR163W | EXO5    | 0.6387 | 0.3056  |
| YBR222C   | PCS60   | YOR101W | RAS1    | 0.6382 | -0.1074 |
| YJR073C   | OPI3    | YGR149W | GPC1    | 0.6382 | 0.1884  |
| YNL035C   | YNL035C | YNL041C | COG6    | 0.6382 | 0.1902  |
| YCL018W   | LEU2    | YBR069C | TAT1    | 0.6379 | -0.1957 |
| YBR071W   | YBR071W | YOR051C | ETT1    | 0.6376 | -0.2687 |
| YPL058C   | PDR12   | YOL104C | NDJ1    | 0.6376 | 0.1952  |
| YIL165C   | YIL165C | YDL171C | GLT1    | 0.6372 | 0.1828  |
| YJR036C   | HUL4    | YGL004C | RPN14   | 0.6372 | 0.2389  |
| YBR077C   | SLM4    | YBR163W | EXO5    | 0.6360 | 0.1545  |
| YEL056W   | HAT2    | YOR196C | LIP5    | 0.6353 | 0.1762  |
| YNL046W   | YNL046W | YCR041W | YCR041W | 0.6352 | 0.1254  |
| YGL053W   | PRM8    | YLL024C | SSA2    | 0.6351 | 0.1764  |

|         |         |           |         |        |         |
|---------|---------|-----------|---------|--------|---------|
| YOL094C | RFC4    | YIL142W   | CCT2    | 0.6351 | 0.1836  |
| YIL066C | RNR3    | YMR209C   | YMR209C | 0.6345 | -0.2056 |
| YML072C | TCB3    | YML004C   | GLO1    | 0.6343 | 0.1101  |
| YER088C | DOT6    | YHR050W   | SMF2    | 0.6337 | 0.0780  |
| YLR257W | YLR257W | YGR028W   | MSP1    | 0.6336 | 0.2665  |
| YDL089W | NUR1    | YDR528W   | HLR1    | 0.6334 | 0.2462  |
| YML048W | GSF2    | YMR010W   | ANY1    | 0.6333 | 0.3524  |
| YOR142W | LSC1    | YFR011C   | MIC19   | 0.6332 | 0.2136  |
| YGL035C | MIG1    | YBR196C   | PGI1    | 0.6331 | -0.1491 |
| YIL119C | RPI1    | YER046W   | SPO73   | 0.6329 | -0.1306 |
| YMR158W | MRPS8   | YFR011C   | MIC19   | 0.6324 | 0.0318  |
| YBR193C | MED8    | YGR001C   | EFM5    | 0.6323 | 0.4244  |
| YOL043C | NTG2    | YBL020W   | RFT1    | 0.6319 | -0.1897 |
| YLR046C | YLR046C | YJL051W   | IRC8    | 0.6317 | 0.1562  |
| YDR441C | APT2    | YKL096W   | CWP1    | 0.6313 | -0.1455 |
| YER186C | YER186C | YFL047W   | RGD2    | 0.6313 | 0.1854  |
| YBR077C | SLM4    | YBR166C   | TYR1    | 0.6312 | 0.2107  |
| YLL038C | ENT4    | YGL226W   | MTC3    | 0.6305 | 0.0925  |
| YBL105C | PKC1    | YBR274W   | CHK1    | 0.6303 | 0.1463  |
| YBR077C | SLM4    | YGR258C   | RAD2    | 0.6303 | -0.1951 |
| YDR180W | SCC2    | YDL164C   | CDC9    | 0.6301 | 0.3062  |
| YKL067W | YNK1    | YHR104W   | GRE3    | 0.6301 | 0.0685  |
| YGR184C | UBR1    | YOR088W   | YOR088W | 0.6299 | 0.0061  |
| YIL040W | APQ12   | YOR127W   | RGA1    | 0.6295 | -0.0147 |
| YDL171C | GLT1    | YIL061C   | SNP1    | 0.6291 | 0.2151  |
| YDL047W | SIT4    | YLR176C   | RFX1    | 0.6286 | 0.2533  |
| YBL079W | NUP170  | YBR222C   | PCS60   | 0.6283 | 0.3103  |
| YGR028W | MSP1    | YCR071C   | IMG2    | 0.6280 | 0.1828  |
| YKR052C | MRS4    | YLR426W   | TDA5    | 0.6278 | -0.2470 |
| YDL167C | NRP1    | YDR351W   | SBE2    | 0.6277 | 0.3443  |
| YNL041C | COG6    | YKL092C   | BUD2    | 0.6273 | 0.2210  |
| YDL147W | RPN5    | YDL135C   | RDI1    | 0.6271 | 0.3597  |
| YGL004C | RPN14   | YJR036C   | HUL4    | 0.6270 | 0.3686  |
| YBR193C | MED8    | YAR027W   | UIP3    | 0.6268 | 0.2241  |
| YOR043W | WHI2    | YKR051W   | YKR051W | 0.6267 | 0.1075  |
| YML036W | CGI121  | YGL226W   | MTC3    | 0.6261 | 0.2862  |
| YLR231C | BNA5    | YER020W   | GPA2    | 0.6256 | 0.1733  |
| YNL326C | PFA3    | YNR034W   | SOL1    | 0.6255 | -0.1659 |
| YDL135C | RDI1    | YEL076W-C | Unknown | 0.6252 | 0.2080  |
| YDR515W | SLF1    | YMR158W   | MRPS8   | 0.6252 | 0.2149  |
| YPR196W | YPR196W | YCL039W   | GID7    | 0.6245 | 0.2113  |
| YNL124W | NAF1    | YOL092W   | YPQ1    | 0.6239 | 0.0196  |
| YDL150W | RPC53   | YMR192W   | GYL1    | 0.6237 | 0.2056  |
| YEL058W | PCM1    | YJR073C   | OPI3    | 0.6237 | 0.1255  |
| YER182W | FMP10   | YKR085C   | MRPL20  | 0.6237 | 0.1581  |
| YDR524C | AGE1    | YOL073C   | DSC2    | 0.6236 | -0.1458 |
| YNL329C | PEX6    | YBL040C   | ERD2    | 0.6236 | -0.0404 |

|           |         |         |         |        |         |
|-----------|---------|---------|---------|--------|---------|
| YPL071C   | YPL071C | YPL009C | RQC2    | 0.6234 | -0.1321 |
| YBR193C   | MED8    | YDR383C | NKP1    | 0.6227 | -0.1765 |
| YDL164C   | CDC9    | YLR430W | SEN1    | 0.6223 | 0.3482  |
| YBR067C   | TIP1    | YNL329C | PEX6    | 0.6222 | 0.2237  |
| YNL074C   | MLF3    | YNL138W | SRV2    | 0.6219 | 0.1862  |
| YJR103W   | URA8    | YBR222C | PCS60   | 0.6218 | 0.1541  |
| YMR062C   | ARG7    | YIL166C | YIL166C | 0.6215 | 0.2963  |
| YOR043W   | WHI2    | YLR426W | TDA5    | 0.6214 | 0.1528  |
| YPR022C   | SDD4    | YLR046C | YLR046C | 0.6212 | 0.1133  |
| YML096W   | YML096W | YNL215W | IES2    | 0.6207 | -0.1697 |
| YOR117W   | RPT5    | YPL064C | CWC27   | 0.6205 | -0.2772 |
| YKR051W   | YKR051W | YMR152W | YIM1    | 0.6204 | 0.1802  |
| YDR319C   | YFT2    | YLR059C | REX2    | 0.6201 | 0.0327  |
| YER037W   | PHM8    | YOR080W | DIA2    | 0.6191 | 0.1603  |
| YJL212C   | OPT1    | YBR069C | TAT1    | 0.6191 | 0.1801  |
| YBR126C   | TPS1    | YGR194C | XKS1    | 0.6178 | 0.3367  |
| YER088C   | DOT6    | YJL158C | CIS3    | 0.6175 | 0.1357  |
| YBR154C   | RPB5    | YDR339C | FCF1    | 0.6174 | 0.2911  |
| YKL183W   | LOT5    | YOR088W | YOR088W | 0.6170 | 0.2581  |
| YBR225W   | YBR225W | YBL007C | SLA1    | 0.6168 | 0.1433  |
| YDR367W   | KEI1    | YGR289C | MAL11   | 0.6168 | -0.0186 |
| YLR389C   | STE23   | YMR005W | TAF4    | 0.6166 | -0.1916 |
| YDL135C   | RDI1    | YFR004W | RPN11   | 0.6165 | 0.1630  |
| YMR154C   | RIM13   | YJR032W | CPR7    | 0.6159 | -0.1693 |
| YLR455W   | PDP3    | YJL149W | DAS1    | 0.6157 | -0.1748 |
| YOL094C   | RFC4    | YFR013W | IOC3    | 0.6152 | 0.3311  |
| YLR180W   | SAM1    | YLR237W | THI7    | 0.6149 | 0.2497  |
| YMR192W   | GYL1    | YDL150W | RPC53   | 0.6148 | 0.2184  |
| YJR056C   | YJR056C | YOR043W | WHI2    | 0.6147 | 0.0570  |
| YLL061W   | MMP1    | YIL066C | RNR3    | 0.6140 | -0.2677 |
| YGL226C-A | OST5    | YKL160W | ELF1    | 0.6137 | 0.0288  |
| YPL234C   | VMA11   | YIL061C | SNP1    | 0.6137 | -0.2239 |
| YNL326C   | PFA3    | YOR264W | DSE3    | 0.6135 | 0.1607  |
| YJR008W   | MHO1    | YKL073W | LHS1    | 0.6133 | 0.1966  |
| YDL217C   | TIM22   | YNL329C | PEX6    | 0.6132 | 0.2626  |
| YER022W   | SRB4    | YOR131C | YOR131C | 0.6129 | 0.1049  |
| YCR071C   | IMG2    | YGR028W | MSP1    | 0.6127 | 0.0720  |
| YGR289C   | MAL11   | YNL034W | YNL034W | 0.6124 | -0.2196 |
| YCR071C   | IMG2    | YJL178C | ATG27   | 0.6123 | -0.2262 |
| YMR123W   | PKR1    | YDR339C | FCF1    | 0.6119 | 0.1923  |
| YNL041C   | COG6    | YJR086W | STE18   | 0.6119 | 0.2350  |
| YEL056W   | HAT2    | YNL035C | YNL035C | 0.6118 | 0.2105  |
| YBR137W   | YBR137W | YBR168W | PEX32   | 0.6117 | 0.1133  |
| YGR209C   | TRX2    | YCL024W | KCC4    | 0.6117 | -0.2417 |
| YJR086W   | STE18   | YJL212C | OPT1    | 0.6114 | -0.1968 |
| YFR004W   | RPN11   | YPL009C | RQC2    | 0.6113 | 0.1108  |
| YER023W   | PRO3    | YJR073C | OPI3    | 0.6112 | 0.1037  |

|         |         |         |         |        |         |
|---------|---------|---------|---------|--------|---------|
| YOR127W | RGA1    | YCR071C | IMG2    | 0.6110 | 0.1146  |
| YML038C | YMD8    | YBR061C | TRM7    | 0.6108 | -0.1823 |
| YFR047C | BNA6    | YHR016C | YSC84   | 0.6106 | 0.1580  |
| YOL147C | PEX11   | YEL068C | YEL068C | 0.6104 | -0.0785 |
| YPR080W | TEF1    | YJL140W | RPB4    | 0.6104 | -0.1446 |
| YMR154C | RIM13   | YLR426W | TDA5    | 0.6101 | 0.1428  |
| YBR229C | ROT2    | YBR274W | CHK1    | 0.6074 | 0.3573  |
| YNL329C | PEX6    | YKL019W | RAM2    | 0.6072 | 0.0931  |
| YML036W | CGI121  | YDL171C | GLT1    | 0.6071 | -0.1517 |
| YHR039C | MSC7    | YBR087W | RFC5    | 0.6068 | 0.1304  |
| YBR193C | MED8    | YGR208W | SER2    | 0.6067 | 0.1741  |
| YNL138W | SRV2    | YGL207W | SPT16   | 0.6067 | 0.1827  |
| YDL155W | CLB3    | YML091C | RPM2    | 0.6065 | 0.0591  |
| YNL215W | IES2    | YLR180W | SAM1    | 0.6065 | -0.0741 |
| YER020W | GPA2    | YGL208W | SIP2    | 0.6064 | 0.0745  |
| YIL111W | COX5b   | YBR157C | ICS2    | 0.6056 | 0.0584  |
| YFR011C | MIC19   | YDL002C | NHP10   | 0.6054 | 0.1984  |
| YOL094C | RFC4    | YOL097C | WRS1    | 0.6051 | 0.0480  |
| YPL144W | POC4    | YBR225W | YBR225W | 0.6048 | -0.1709 |
| YDL097C | RPN6    | YDR515W | SLF1    | 0.6047 | 0.0673  |
| YOR054C | VHS3    | YJL183W | MNN11   | 0.6046 | -0.1166 |
| YLL035W | GRC3    | YGR211W | ZPR1    | 0.6042 | 0.2607  |
| YJL212C | OPT1    | YER088C | DOT6    | 0.6036 | 0.1789  |
| YGL257C | MNT2    | YML016C | PPZ1    | 0.6035 | 0.1119  |
| YKL125W | RRN3    | YOR144C | ELG1    | 0.6033 | 0.1655  |
| YLR056W | ERG3    | YKL125W | RRN3    | 0.6028 | 0.2210  |
| YOR117W | RPT5    | YML048W | GSF2    | 0.6028 | 0.0921  |
| YDL171C | GLT1    | YCL009C | ILV6    | 0.6025 | 0.0929  |
| YPL233W | NSL1    | YIL165C | YIL165C | 0.6023 | 0.2501  |
| YPL071C | YPL071C | YDR528W | HLR1    | 0.6023 | 0.0257  |
| YDR515W | SLF1    | YDL097C | RPN6    | 0.6017 | 0.1053  |
| YOL089C | HAL9    | YOL026C | MIM1    | 0.6017 | -0.2540 |
| YKL019W | RAM2    | YML072C | TCB3    | 0.6011 | 0.0124  |
| YEL064C | AVT2    | YLR096W | KIN2    | 0.6010 | -0.0967 |
| YGR149W | GPC1    | YOL094C | RFC4    | 0.6005 | -0.2766 |
| YJL171C | TOH1    | YEL058W | PCM1    | 0.5997 | 0.1292  |
| YAL056W | GPB2    | YLR180W | SAM1    | 0.5996 | -0.1810 |
| YNR036C | MRPS12  | YGL226W | MTC3    | 0.5996 | 0.3081  |
| YLR452C | SST2    | YIL082W | Unknown | 0.5994 | 0.2119  |
| YKL019W | RAM2    | YLR426W | TDA5    | 0.5992 | 0.1614  |
| YBR168W | PEX32   | YBR163W | EXO5    | 0.5991 | 0.1247  |
| YDR513W | GRX2    | YLR258W | GSY2    | 0.5990 | 0.1894  |
| YNL322C | KRE1    | YGR150C | CCM1    | 0.5989 | -0.1284 |
| YHR050W | SMF2    | YER088C | DOT6    | 0.5988 | 0.0984  |
| YNL322C | KRE1    | YML013W | UBX2    | 0.5988 | 0.1623  |
| YDL103C | QRI1    | YIL142W | CCT2    | 0.5987 | 0.2472  |
| YJR088C | EMC2    | YJR086W | STE18   | 0.5985 | 0.1231  |

|         |         |           |         |        |         |
|---------|---------|-----------|---------|--------|---------|
| YLR426W | TDA5    | YKL019W   | RAM2    | 0.5983 | 0.0315  |
| YLR443W | ECM7    | YHL048W   | COS8    | 0.5976 | -0.0320 |
| YGL208W | SIP2    | YBR037C   | SCO1    | 0.5974 | 0.1685  |
| YGR207C | CIR1    | YGR208W   | SER2    | 0.5973 | 0.1055  |
| YML098W | TAF13   | YNR034W   | SOL1    | 0.5972 | 0.1756  |
| YNL041C | COG6    | YDL047W   | SIT4    | 0.5970 | -0.2084 |
| YKL160W | ELF1    | YAL009W   | SPO7    | 0.5967 | 0.2224  |
| YGR157W | CHO2    | YDR383C   | NKP1    | 0.5956 | -0.2730 |
| YKR080W | MTD1    | YOL073C   | DSC2    | 0.5954 | -0.1493 |
| YGR208W | SER2    | YOR144C   | ELG1    | 0.5953 | 0.0367  |
| YMR152W | YIM1    | YLR057W   | MNL2    | 0.5951 | -0.2303 |
| YPL058C | PDR12   | YLR176C   | RFX1    | 0.5946 | -0.1852 |
| YFR004W | RPN11   | YJL030W   | MAD2    | 0.5945 | 0.1561  |
| YNL322C | KRE1    | YKL184W   | SPE1    | 0.5944 | 0.1424  |
| YDR420W | HKR1    | YDL167C   | NRP1    | 0.5940 | 0.2089  |
| YIL089W | YIL089W | YGL193C   | YGL193C | 0.5931 | -0.1873 |
| YDL147W | RPN5    | YPL234C   | VMA11   | 0.5930 | -0.1507 |
| YIL171W | YIL171W | YAL009W   | SPO7    | 0.5928 | -0.2024 |
| YDR515W | SLF1    | YDR524C   | AGE1    | 0.5925 | 0.3616  |
| YBL040C | ERD2    | YNL329C   | PEX6    | 0.5923 | -0.1930 |
| YER150W | SPI1    | YOL081W   | IRA2    | 0.5923 | 0.3199  |
| YML071C | COG8    | YMR005W   | TAF4    | 0.5915 | 0.1514  |
| YEL064C | AVT2    | YJR036C   | HUL4    | 0.5913 | 0.1984  |
| YFL018C | LPD1    | YNR034W   | SOL1    | 0.5913 | -0.2009 |
| YJR108W | ABM1    | YEL076W-C | Unknown | 0.5913 | 0.1351  |
| YPL001W | HAT1    | YDL135C   | RDI1    | 0.5912 | -0.0841 |
| YHR016C | YSC84   | YLR258W   | GSY2    | 0.5911 | 0.3547  |
| YNL215W | IES2    | YGR207C   | CIR1    | 0.5910 | 0.1710  |
| YOR103C | OST2    | YCL024W   | KCC4    | 0.5909 | -0.1170 |
| YBR137W | YBR137W | YPL183C   | RTT10   | 0.5906 | -0.1684 |
| YBR196C | PGI1    | YEL071W   | DLD3    | 0.5906 | 0.1251  |
| YGR222W | PET54   | YDL155W   | CLB3    | 0.5905 | 0.1153  |
| YMR192W | GYL1    | YPL016W   | SWI1    | 0.5902 | 0.2077  |
| YOR117W | RPT5    | YNL135C   | FPR1    | 0.5902 | 0.1555  |
| YBL089W | AVT5    | YBL029W   | YBL029W | 0.5897 | 0.2045  |
| YOL113W | SKM1    | YLR047C   | FRE8    | 0.5896 | 0.1803  |
| YLR176C | RFX1    | YKR080W   | MTD1    | 0.5893 | -0.1716 |
| YML098W | TAF13   | YKL116C   | PRR1    | 0.5887 | -0.0573 |
| YGL053W | PRM8    | YIL165C   | YIL165C | 0.5883 | 0.1473  |
| YKL160W | ELF1    | YDL164C   | CDC9    | 0.5883 | -0.1550 |
| YML036W | CGI121  | YER019W   | ISC1    | 0.5883 | 0.1950  |
| YGL195W | GCN1    | YNL035C   | YNL035C | 0.5882 | 0.1885  |
| YGR258C | RAD2    | YAL051W   | OAF1    | 0.5876 | 0.0404  |
| YKL183W | LOT5    | YLR330W   | CHS5    | 0.5871 | 0.0286  |
| YHL048W | COS8    | YLR443W   | ECM7    | 0.5862 | -0.1705 |
| YDL135C | RDI1    | YHR054C   | YHR054C | 0.5856 | -0.1759 |
| YKL096W | CWP1    | YJR074W   | MOG1    | 0.5853 | 0.1497  |

|         |         |           |         |        |         |
|---------|---------|-----------|---------|--------|---------|
| YOR142W | LSC1    | YOL073C   | DSC2    | 0.5851 | 0.2264  |
| YJR040W | GEF1    | YNL138W   | SRV2    | 0.5850 | 0.1045  |
| YDR528W | HLR1    | YDR530C   | APA2    | 0.5849 | 0.2549  |
| YER037W | PHM8    | YLL061W   | MMP1    | 0.5839 | -0.1776 |
| YLR430W | SEN1    | YDR319C   | YFT2    | 0.5839 | -0.1793 |
| YBR154C | RPB5    | YBR249C   | ARO4    | 0.5838 | 0.2219  |
| YML038C | YMD8    | YPL009C   | RQC2    | 0.5837 | 0.1448  |
| YOL147C | PEX11   | YGL208W   | SIP2    | 0.5837 | 0.1565  |
| YJR108W | ABM1    | YPL016W   | SWI1    | 0.5835 | -0.1822 |
| YNR034W | SOL1    | YFR011C   | MIC19   | 0.5832 | -0.1169 |
| YLR442C | SIR3    | YNL022C   | RCM1    | 0.5829 | 0.1540  |
| YBR163W | EXO5    | YBR161W   | CSH1    | 0.5824 | 0.2151  |
| YOR080W | DIA2    | YCL024W   | KCC4    | 0.5816 | -0.0897 |
| YBL030C | PET9    | YLL024C   | SSA2    | 0.5814 | -0.0616 |
| YDL171C | GLT1    | YKL110C   | KTI12   | 0.5813 | 0.1635  |
| YDR441C | APT2    | YGR006W   | PRP18   | 0.5813 | -0.1812 |
| YER023W | PRO3    | YLR206W   | ENT2    | 0.5813 | -0.2002 |
| YJR025C | BNA1    | YJR086W   | STE18   | 0.5810 | 0.1785  |
| YMR209C | YMR209C | YIL066C   | RNR3    | 0.5808 | -0.1584 |
| YOL062C | APM4    | YJL036W   | SNX4    | 0.5798 | 0.0376  |
| YFR013W | IOC3    | YNL041C   | COG6    | 0.5796 | 0.2247  |
| YDL132W | CDC53   | YFL018C   | LPD1    | 0.5795 | 0.1721  |
| YBR071W | YBR071W | YER144C   | UBP5    | 0.5794 | 0.2942  |
| YBR229C | ROT2    | YBR161W   | CSH1    | 0.5790 | 0.1524  |
| YKR075C | YKR075C | YER186C   | YER186C | 0.5790 | -0.2055 |
| YLR375W | STP3    | YOL073C   | DSC2    | 0.5790 | 0.3643  |
| YDL211C | YDL211C | YEL064C   | AVT2    | 0.5788 | 0.0703  |
| YJR036C | HUL4    | YOR048C   | RAT1    | 0.5779 | -0.0779 |
| YBR067C | TIP1    | YEL064C   | AVT2    | 0.5778 | 0.0869  |
| YGL176C | YGL176C | YNL124W   | NAF1    | 0.5777 | 0.2004  |
| YBR239C | ERT1    | YER116C   | SLX8    | 0.5776 | -0.2397 |
| YOL113W | SKM1    | YER150W   | SPI1    | 0.5776 | -0.0911 |
| YOR264W | DSE3    | YHR115C   | DMA1    | 0.5776 | -0.2492 |
| YNL322C | KRE1    | YER116C   | SLX8    | 0.5775 | -0.1570 |
| YHR027C | RPN1    | YMR067C   | UBX4    | 0.5772 | 0.2237  |
| YJR073C | OPI3    | YJR103W   | URA8    | 0.5772 | 0.2145  |
| YNL074C | MLF3    | YLR426W   | TDA5    | 0.5771 | 0.1760  |
| YOR103C | OST2    | YGL226C-A | OST5    | 0.5771 | 0.1450  |
| YML072C | TCB3    | YLR342W   | FKS1    | 0.5768 | 0.0752  |
| YER116C | SLX8    | YPL058C   | PDR12   | 0.5766 | -0.0993 |
| YGL226W | MTC3    | YMR154C   | RIM13   | 0.5765 | 0.1539  |
| YAL009W | SPO7    | YJR074W   | MOG1    | 0.5758 | 0.0878  |
| YGL053W | PRM8    | YAR027W   | UIP3    | 0.5756 | 0.1092  |
| YOL062C | APM4    | YMR010W   | ANY1    | 0.5756 | 0.1829  |
| YEL071W | DLD3    | YHR050W   | SMF2    | 0.5754 | -0.2858 |
| YGL193C | YGL193C | YOL113W   | SKM1    | 0.5742 | 0.1033  |
| YGR168C | YGR168C | YAL056W   | GPB2    | 0.5741 | -0.1508 |

|         |         |         |         |        |         |
|---------|---------|---------|---------|--------|---------|
| YER046W | SPO73   | YEL021W | URA3    | 0.5740 | -0.2254 |
| YPL071C | YPL071C | YEL064C | AVT2    | 0.5740 | 0.1774  |
| YKR080W | MTD1    | YGL193C | YGL193C | 0.5739 | -0.1701 |
| YFR047C | BNA6    | YML096W | YML096W | 0.5737 | -0.2609 |
| YIR028W | DAL4    | YLR368W | MDM30   | 0.5729 | -0.2019 |
| YCL024W | KCC4    | YOR103C | OST2    | 0.5728 | -0.1710 |
| YIL082W | Unknown | YGL178W | MPT5    | 0.5724 | 0.2040  |
| YBR069C | TAT1    | YPL058C | PDR12   | 0.5723 | -0.1473 |
| YER019W | ISC1    | YJL030W | MAD2    | 0.5715 | 0.2135  |
| YGL017W | ATE1    | YIL158W | AIM20   | 0.5715 | -0.1138 |
| YAL009W | SPO7    | YBL020W | RFT1    | 0.5712 | -0.1085 |
| YPL001W | HAT1    | YDL211C | YDL211C | 0.5712 | 0.1429  |
| YJL217W | REE1    | YGL169W | SUA5    | 0.5711 | -0.1749 |
| YHR115C | DMA1    | YOL062C | APM4    | 0.5710 | 0.1118  |
| YFR013W | IOC3    | YOL094C | RFC4    | 0.5709 | 0.0797  |
| YOR117W | RPT5    | YGR184C | UBR1    | 0.5709 | 0.0712  |
| YOL026C | MIM1    | YOL089C | HAL9    | 0.5708 | -0.1025 |
| YOR117W | RPT5    | YHR027C | RPN1    | 0.5708 | 0.2055  |
| YDL047W | SIT4    | YNL041C | COG6    | 0.5707 | -0.1769 |
| YLR056W | ERG3    | YHR039C | MSC7    | 0.5707 | 0.1011  |
| YDL217C | TIM22   | YKL096W | CWP1    | 0.5706 | -0.1620 |
| YBR249C | ARO4    | YGR150C | CCM1    | 0.5703 | -0.2929 |
| YER116C | SLX8    | YNL322C | KRE1    | 0.5703 | -0.0521 |
| YHR029C | YHI9    | YGR207C | CIR1    | 0.5703 | 0.2164  |
| YCR083W | TRX3    | YIL066C | RNR3    | 0.5702 | 0.1501  |
| YDL103C | QRI1    | YLR375W | STP3    | 0.5702 | -0.2021 |
| YML016C | PPZ1    | YGL178W | MPT5    | 0.5702 | 0.1354  |
| YMR123W | PKR1    | YPL071C | YPL071C | 0.5702 | -0.0960 |
| YDR441C | APT2    | YLL035W | GRC3    | 0.5697 | 0.2438  |
| YKR080W | MTD1    | YNL074C | MLF3    | 0.5697 | 0.1885  |
| YOR131C | YOR131C | YJL030W | MAD2    | 0.5694 | 0.1350  |
| YCL009C | ILV6    | YLR426W | TDA5    | 0.5690 | 0.0965  |
| YLR452C | SST2    | YBR157C | ICS2    | 0.5687 | -0.0734 |
| YOR196C | LIP5    | YHR063C | PAN5    | 0.5687 | 0.2375  |
| YBL007C | SLA1    | YBL017C | PEP1    | 0.5682 | 0.1778  |
| YOL026C | MIM1    | YLR455W | PDP3    | 0.5682 | 0.2264  |
| YBR225W | YBR225W | YBR229C | ROT2    | 0.5681 | 0.1055  |
| YLL035W | GRC3    | YGR207C | CIR1    | 0.5674 | -0.2209 |
| YLR330W | CHS5    | YOL018C | TLG2    | 0.5673 | 0.0630  |
| YHR050W | SMF2    | YOL147C | PEX11   | 0.5672 | 0.2769  |
| YFL049W | SWP82   | YPL064C | CWC27   | 0.5670 | 0.1924  |
| YNL278W | CAF120  | YML079W | YML079W | 0.5669 | -0.0196 |
| YIL061C | SNP1    | YDL097C | RPN6    | 0.5668 | 0.0854  |
| YCR031C | RPS14a  | YDR064W | RPS13   | 0.5666 | 0.2234  |
| YAL009W | SPO7    | YJL208C | NUC1    | 0.5662 | -0.0388 |
| YDR524C | AGE1    | YDL217C | TIM22   | 0.5662 | 0.2062  |
| YJR088C | EMC2    | YER023W | PRO3    | 0.5659 | 0.0960  |

|           |         |         |         |        |         |
|-----------|---------|---------|---------|--------|---------|
| YLR176C   | RFX1    | YLR057W | MNL2    | 0.5653 | -0.0923 |
| YNL322C   | KRE1    | YOL073C | DSC2    | 0.5651 | 0.0655  |
| YJR088C   | EMC2    | YGL242C | YGL242C | 0.5649 | 0.3433  |
| YAL009W   | SPO7    | YDL133W | SRF1    | 0.5646 | 0.1377  |
| YFR037C   | RSC8    | YGL025C | PGD1    | 0.5645 | 0.1082  |
| YLR248W   | RCK2    | YDL133W | SRF1    | 0.5643 | 0.1611  |
| YDL171C   | GLT1    | YMR005W | TAF4    | 0.5641 | -0.1863 |
| YML096W   | YML096W | YMR123W | PKR1    | 0.5639 | 0.1691  |
| YDL133W   | SRF1    | YNL074C | MLF3    | 0.5637 | -0.2261 |
| YPL016W   | SWI1    | YAR028W | YAR028W | 0.5636 | -0.1726 |
| YHL007C   | STE20   | YER049W | TPA1    | 0.5635 | 0.1073  |
| YHR104W   | GRE3    | YOL153C | YOL153C | 0.5633 | 0.1879  |
| YNL035C   | YNL035C | YAL051W | OAF1    | 0.5633 | 0.0642  |
| YOL088C   | MPD2    | YJL030W | MAD2    | 0.5633 | 0.1445  |
| YLL035W   | GRC3    | YLR443W | ECM7    | 0.5631 | 0.1925  |
| YML004C   | GLO1    | YIL066C | RNR3    | 0.5630 | 0.0473  |
| YML096W   | YML096W | YOL130W | ALR1    | 0.5625 | 0.1565  |
| YNL326C   | PFA3    | YML038C | YMD8    | 0.5624 | 0.0838  |
| YCL026C-A | FRM2    | YLR330W | CHS5    | 0.5623 | -0.2236 |
| YPL237W   | SUI3    | YKL160W | ELF1    | 0.5622 | 0.3659  |
| YMR158W   | MRPS8   | YER182W | FMP10   | 0.5621 | 0.1136  |
| YDL047W   | SIT4    | YPL071C | YPL071C | 0.5619 | -0.1820 |
| YPL147W   | PXA1    | YJR103W | URA8    | 0.5607 | 0.0785  |
| YGL178W   | MPT5    | YLL040C | VPS13   | 0.5606 | 0.1372  |
| YKL021C   | MAK11   | YEL055C | POL5    | 0.5606 | 0.4058  |
| YBL007C   | SLA1    | YBR087W | RFC5    | 0.5605 | 0.2358  |
| YER046W   | SPO73   | YKL183W | LOT5    | 0.5604 | -0.1483 |
| YEL055C   | POL5    | YBR121C | GRS1    | 0.5603 | 0.2107  |
| YOL081W   | IRA2    | YBL017C | PEP1    | 0.5600 | 0.2186  |
| YGR012W   | MCY1    | YIL171W | YIL171W | 0.5598 | -0.0911 |
| YHR043C   | DOG2    | YBR168W | PEX32   | 0.5597 | 0.0937  |
| YLR342W   | FKS1    | YDL217C | TIM22   | 0.5596 | -0.0615 |
| YOR101W   | RAS1    | YPL183C | RTT10   | 0.5592 | 0.0507  |
| YKL160W   | ELF1    | YIL166C | YIL166C | 0.5590 | -0.2240 |
| YBR274W   | CHK1    | YBL029W | YBL029W | 0.5588 | 0.1900  |
| YGL004C   | RPN14   | YOL094C | RFC4    | 0.5588 | 0.1034  |
| YGL207W   | SPT16   | YAL009W | SPO7    | 0.5586 | -0.2555 |
| YBR239C   | ERT1    | YOR142W | LSC1    | 0.5581 | -0.1650 |
| YBR239C   | ERT1    | YLR237W | THI7    | 0.5580 | 0.2883  |
| YBR132C   | AGP2    | YGR149W | GPC1    | 0.5575 | 0.1756  |
| YFL016C   | MDJ1    | YOR054C | VHS3    | 0.5574 | 0.1400  |
| YMR062C   | ARG7    | YBR147W | RTC2    | 0.5573 | 0.2658  |
| YNL046W   | YNL046W | YER019W | ISC1    | 0.5573 | 0.0572  |
| YBR193C   | MED8    | YGR158C | MTR3    | 0.5566 | 0.2032  |
| YOL164W   | BDS1    | YAL009W | SPO7    | 0.5566 | -0.1186 |
| YCL039W   | GID7    | YDL089W | NUR1    | 0.5563 | 0.0245  |
| YKL116C   | PRR1    | YGL169W | SUA5    | 0.5563 | 0.1550  |



|         |         |           |         |        |         |
|---------|---------|-----------|---------|--------|---------|
| YIR022W | SEC11   | YOR103C   | OST2    | 0.5560 | 0.1351  |
| YOL062C | APM4    | YAL056W   | GPB2    | 0.5555 | 0.2557  |
| YLR368W | MDM30   | YNL138W   | SRV2    | 0.5552 | -0.0946 |
| YNL024C | EFM6    | YML072C   | TCB3    | 0.5548 | -0.0870 |
| YOL113W | SKM1    | YOL104C   | NDJ1    | 0.5547 | 0.2217  |
| YJL140W | RPB4    | YGR150C   | CCM1    | 0.5545 | -0.1603 |
| YPL234C | VMA11   | YJL183W   | MNN11   | 0.5542 | 0.1008  |
| YAL051W | OAF1    | YDL103C   | QRI1    | 0.5538 | 0.1765  |
| YPR196W | YPR196W | YNL034W   | YNL034W | 0.5536 | 0.2090  |
| YNL135C | FPR1    | YNR036C   | MRPS12  | 0.5534 | 0.1095  |
| YDL133W | SRF1    | YIL111W   | COX5b   | 0.5531 | 0.0809  |
| YBR163W | EXO5    | YBR077C   | SLM4    | 0.5530 | 0.1962  |
| YDR515W | SLF1    | YDL002C   | NHP10   | 0.5529 | 0.1269  |
| YER144C | UBP5    | YBR071W   | YBR071W | 0.5529 | 0.2042  |
| YOR092W | ECM3    | YGL017W   | ATE1    | 0.5529 | 0.1514  |
| YDR319C | YFT2    | YOL089C   | HAL9    | 0.5528 | -0.2313 |
| YHR115C | DMA1    | YBR137W   | YBR137W | 0.5528 | -0.0821 |
| YJL212C | OPT1    | YGL195W   | GCN1    | 0.5528 | -0.1526 |
| YOL104C | NDJ1    | YOL113W   | SKM1    | 0.5526 | 0.1963  |
| YML072C | TCB3    | YJL051W   | IRC8    | 0.5523 | 0.0930  |
| YNR012W | URK1    | YDL167C   | NRP1    | 0.5522 | 0.2790  |
| YMR010W | ANY1    | YIL119C   | RPI1    | 0.5517 | 0.1559  |
| YGL201C | MCM6    | YGR023W   | MTL1    | 0.5516 | 0.1224  |
| YLR330W | CHS5    | YOR054C   | VHS3    | 0.5516 | 0.0135  |
| YDR513W | GRX2    | YGR209C   | TRX2    | 0.5515 | 0.1591  |
| YGL025C | PGD1    | YDR319C   | YFT2    | 0.5515 | 0.1903  |
| YDR058C | TGL2    | YDR530C   | APA2    | 0.5510 | 0.1946  |
| YBR157C | ICS2    | YGL226C-A | OST5    | 0.5507 | 0.1585  |
| YJR074W | MOG1    | YKL096W   | CWP1    | 0.5505 | 0.1462  |
| YBL017C | PEP1    | YLR389C   | STE23   | 0.5502 | 0.4165  |
| YDR180W | SCC2    | YLR181C   | VTA1    | 0.5499 | 0.1193  |
| YOL094C | RFC4    | YLR172C   | DPH5    | 0.5495 | 0.1012  |
| YDR319C | YFT2    | YGR012W   | MCY1    | 0.5493 | -0.1134 |
| YNL135C | FPR1    | YGR149W   | GPC1    | 0.5493 | -0.1249 |
| YER020W | GPA2    | YBR121C   | GRS1    | 0.5490 | -0.0942 |
| YMR005W | TAF4    | YLR046C   | YLR046C | 0.5490 | -0.1446 |
| YGL226W | MTC3    | YML079W   | YML079W | 0.5489 | 0.2444  |
| YMR154C | RIM13   | YJL047C   | RTT101  | 0.5484 | 0.1228  |
| YOL018C | TLG2    | YJL036W   | SNX4    | 0.5477 | 0.0641  |
| YIL166C | YIL166C | YNL034W   | YNL034W | 0.5476 | 0.1592  |
| YOR054C | VHS3    | YER020W   | GPA2    | 0.5476 | 0.1382  |
| YJR068W | RFC2    | YNL035C   | YNL035C | 0.5474 | 0.1808  |
| YHR063C | PAN5    | YGR012W   | MCY1    | 0.5473 | 0.1336  |
| YKL092C | BUD2    | YJL187C   | SWE1    | 0.5469 | 0.1246  |
| YDL133W | SRF1    | YHR039C   | MSC7    | 0.5466 | -0.0922 |
| YPL183C | RTT10   | YOR101W   | RAS1    | 0.5466 | 0.3543  |
| YNL034W | YNL034W | YIL111W   | COX5b   | 0.5465 | -0.1222 |

|         |         |         |         |        |         |
|---------|---------|---------|---------|--------|---------|
| YOR054C | VHS3    | YIL009W | FAA3    | 0.5465 | -0.2251 |
| YER037W | PHM8    | YAL056W | GPB2    | 0.5464 | 0.1844  |
| YFL049W | SWP82   | YKL116C | PRR1    | 0.5464 | 0.0671  |
| YKL073W | LHS1    | YJR008W | MHO1    | 0.5459 | 0.0070  |
| YML071C | COG8    | YOL018C | TLG2    | 0.5459 | 0.2014  |
| YBL007C | SLA1    | YBR008C | FLR1    | 0.5456 | 0.3189  |
| YBR166C | TYR1    | YNL041C | COG6    | 0.5456 | 0.2361  |
| YMR046C | YMR046C | YDR178W | SDH4    | 0.5452 | -0.1416 |
| YOL147C | PEX11   | YHR050W | SMF2    | 0.5449 | 0.1131  |
| YKR080W | MTD1    | YGR207C | CIR1    | 0.5446 | 0.0692  |
| YNL326C | PFA3    | YLR057W | MNL2    | 0.5446 | 0.1920  |
| YDR178W | SDH4    | YMR046C | YMR046C | 0.5445 | -0.2114 |
| YLR368W | MDM30   | YJL118W | YJL118W | 0.5444 | -0.0793 |
| YJL154C | VPS35   | YKL160W | ELF1    | 0.5443 | -0.0973 |
| YPL144W | POC4    | YOL092W | YPQ1    | 0.5437 | 0.0688  |
| YGR184C | UBR1    | YEL056W | HAT2    | 0.5435 | 0.2162  |
| YJL118W | YJL118W | YIR022W | SEC11   | 0.5433 | 0.0707  |
| YGR152C | RSR1    | YML071C | COG8    | 0.5432 | 0.3669  |
| YDR441C | APT2    | YDR319C | YFT2    | 0.5431 | 0.1372  |
| YLR172C | DPH5    | YDR420W | HKR1    | 0.5420 | -0.3064 |
| YKL184W | SPE1    | YCL009C | ILV6    | 0.5419 | 0.0905  |
| YJL187C | SWE1    | YGR288W | MAL13   | 0.5418 | -0.2085 |
| YCR083W | TRX3    | YNR036C | MRPS12  | 0.5413 | 0.0992  |
| YGL176C | YGL176C | YBR166C | TYR1    | 0.5411 | -0.2225 |
| YJL158C | CIS3    | YER088C | DOT6    | 0.5407 | 0.2728  |
| YAL056W | GPB2    | YGR149W | GPC1    | 0.5402 | 0.1885  |
| YBR147W | RTC2    | YJR008W | MHO1    | 0.5401 | 0.3489  |
| YIL061C | SNP1    | YPL064C | CWC27   | 0.5400 | -0.1703 |
| YJL187C | SWE1    | YJR008W | MHO1    | 0.5400 | -0.1421 |
| YGR157W | CHO2    | YDR058C | TGL2    | 0.5393 | -0.0219 |
| YGR209C | TRX2    | YDR513W | GRX2    | 0.5393 | 0.1467  |
| YPL012W | RRP12   | YPL226W | NEW1    | 0.5393 | 0.4334  |
| YHR023W | MYO1    | YKL092C | BUD2    | 0.5392 | 0.0051  |
| YJL217W | REE1    | YFR013W | IOC3    | 0.5390 | -0.1791 |
| YGL176C | YGL176C | YDL133W | SRF1    | 0.5389 | 0.0930  |
| YJL204C | RCY1    | YDR420W | HKR1    | 0.5386 | 0.0439  |
| YMR192W | GYL1    | YOR092W | ECM3    | 0.5385 | -0.0877 |
| YBL089W | AVT5    | YOL092W | YPQ1    | 0.5384 | 0.0770  |
| YBR193C | MED8    | YOR033C | EXO1    | 0.5382 | 0.1467  |
| YHR033W | YHR033W | YOR144C | ELG1    | 0.5382 | -0.1784 |
| YLR052W | IES3    | YJR073C | OPI3    | 0.5374 | -0.0928 |
| YOL093W | TRM10   | YNL242W | ATG2    | 0.5371 | -0.3496 |
| YDL133W | SRF1    | YLR248W | RCK2    | 0.5368 | 0.0298  |
| YKL116C | PRR1    | YGL193C | YGL193C | 0.5368 | -0.2062 |
| YJR097W | JJJ3    | YML091C | RPM2    | 0.5367 | -0.0093 |
| YOR048C | RAT1    | YDR178W | SDH4    | 0.5367 | -0.3231 |
| YHR034C | PIH1    | YGR149W | GPC1    | 0.5364 | 0.1331  |

|           |         |         |         |        |         |
|-----------|---------|---------|---------|--------|---------|
| YDR515W   | SLF1    | YLR375W | STP3    | 0.5361 | -0.1724 |
| YIR022W   | SEC11   | YJL118W | YJL118W | 0.5360 | 0.2846  |
| YDL103C   | QRI1    | YDL116W | NUP84   | 0.5358 | 0.4378  |
| YPL233W   | NSL1    | YML048W | GSF2    | 0.5357 | -0.1218 |
| YOR117W   | RPT5    | YNL138W | SRV2    | 0.5356 | 0.0445  |
| YKL092C   | BUD2    | YML036W | CGI121  | 0.5354 | 0.1314  |
| YBR193C   | MED8    | YGL176C | YGL176C | 0.5350 | 0.1755  |
| YMR005W   | TAF4    | YJL212C | OPT1    | 0.5348 | 0.1737  |
| YMR067C   | UBX4    | YNL046W | YNL046W | 0.5347 | -0.1677 |
| YIL133C   | RPL16a  | YCR031C | RPS14a  | 0.5344 | 0.5321  |
| YMR010W   | ANY1    | YNR034W | SOL1    | 0.5344 | -0.1879 |
| YMR010W   | ANY1    | YKR051W | YKR051W | 0.5343 | 0.0927  |
| YAL056W   | GPB2    | YPL058C | PDR12   | 0.5341 | 0.1915  |
| YEL076W-C | Unknown | YBR071W | YBR071W | 0.5341 | -0.0843 |
| YER020W   | GPA2    | YFL016C | MDJ1    | 0.5340 | 0.1713  |
| YNL124W   | NAF1    | YER046W | SPO73   | 0.5324 | -0.2594 |
| YKL110C   | KTI12   | YJL208C | NUC1    | 0.5317 | 0.0898  |
| YNL321W   | VNX1    | YJL212C | OPT1    | 0.5315 | 0.2902  |
| YKL019W   | RAM2    | YEL056W | HAT2    | 0.5312 | 0.1384  |
| YNL280C   | ERG24   | YDR321W | ASP1    | 0.5311 | 0.1278  |
| YDR524C   | AGE1    | YLL040C | VPS13   | 0.5310 | -0.1912 |
| YLR287C   | YLR287C | YLR435W | TSR2    | 0.5305 | 0.1775  |
| YFR042W   | KEG1    | YDR528W | HLR1    | 0.5304 | 0.0646  |
| YOR033C   | EXO1    | YGR211W | ZPR1    | 0.5303 | 0.1046  |
| YBR239C   | ERT1    | YMR215W | GAS3    | 0.5296 | -0.1763 |
| YEL056W   | HAT2    | YHL007C | STE20   | 0.5293 | 0.1075  |
| YNL322C   | KRE1    | YNL138W | SRV2    | 0.5286 | 0.1343  |
| YPL031C   | PHO85   | YER020W | GPA2    | 0.5280 | 0.1379  |
| YDR319C   | YFT2    | YIL040W | APQ12   | 0.5278 | 0.1475  |
| YGL017W   | ATE1    | YOR117W | RPT5    | 0.5278 | 0.1634  |
| YGR208W   | SER2    | YGL257C | MNT2    | 0.5276 | 0.2272  |
| YIL165C   | YIL165C | YPL147W | PXA1    | 0.5274 | -0.0558 |
| YJR086W   | STE18   | YDR524C | AGE1    | 0.5271 | -0.2107 |
| YBL105C   | PKC1    | YLL040C | VPS13   | 0.5270 | 0.1351  |
| YKL067W   | YNK1    | YJR103W | URA8    | 0.5265 | 0.0445  |
| YLL035W   | GRC3    | YLR452C | SST2    | 0.5265 | 0.1943  |
| YDR515W   | SLF1    | YPL234C | VMA11   | 0.5264 | -0.2420 |
| YDR058C   | TGL2    | YDR383C | NKP1    | 0.5259 | 0.0388  |
| YDL147W   | RPN5    | YGL242C | YGL242C | 0.5256 | 0.0187  |
| YGL004C   | RPN14   | YLR442C | SIR3    | 0.5256 | 0.2743  |
| YGR023W   | MTL1    | YJL126W | NIT2    | 0.5256 | -0.1959 |
| YJL158C   | CIS3    | YBR166C | TYR1    | 0.5255 | -0.0478 |
| YDR420W   | HKR1    | YDL171C | GLT1    | 0.5252 | 0.1157  |
| YCR041W   | YCR041W | YGL035C | MIG1    | 0.5248 | -0.1185 |
| YMR067C   | UBX4    | YML048W | GSF2    | 0.5246 | 0.0449  |
| YBR161W   | CSH1    | YGR207C | CIR1    | 0.5242 | -0.1707 |
| YGR157W   | CHO2    | YLR206W | ENT2    | 0.5240 | 0.3428  |

|         |         |           |         |        |         |
|---------|---------|-----------|---------|--------|---------|
| YOL026C | MIM1    | YGL226C-A | OST5    | 0.5238 | 0.1884  |
| YLR056W | ERG3    | YBR061C   | TRM7    | 0.5237 | 0.1188  |
| YMR005W | TAF4    | YOR103C   | OST2    | 0.5234 | -0.1475 |
| YJR036C | HUL4    | YGL178W   | MPT5    | 0.5233 | -0.2105 |
| YDL164C | CDC9    | YDL047W   | SIT4    | 0.5230 | 0.1935  |
| YMR154C | RIM13   | YML121W   | GTR1    | 0.5229 | 0.1857  |
| YNL326C | PFA3    | YGR258C   | RAD2    | 0.5226 | 0.2047  |
| YAL056W | GPB2    | YIL040W   | APQ12   | 0.5225 | 0.1749  |
| YJR097W | JJJ3    | YMR115W   | MGR3    | 0.5224 | 0.2137  |
| YBR222C | PCS60   | YFR011C   | MIC19   | 0.5222 | -0.2519 |
| YNR034W | SOL1    | YKL096W   | CWP1    | 0.5222 | 0.1866  |
| YNL322C | KRE1    | YLR375W   | STP3    | 0.5220 | 0.2049  |
| YPL233W | NSL1    | YGL051W   | MST27   | 0.5219 | 0.1436  |
| YDL097C | RPN6    | YDL103C   | QRI1    | 0.5211 | 0.4151  |
| YLL024C | SSA2    | YGL226C-A | OST5    | 0.5211 | 0.0606  |
| YML004C | GLO1    | YML072C   | TCB3    | 0.5211 | 0.0000  |
| YOL153C | YOL153C | YLR449W   | FPR4    | 0.5210 | -0.3070 |
| YPR080W | TEF1    | YOL073C   | DSC2    | 0.5208 | -0.0773 |
| YPR196W | YPR196W | YCL009C   | ILV6    | 0.5208 | -0.0354 |
| YGL242C | YGL242C | YJL051W   | IRC8    | 0.5204 | -0.1121 |
| YBL029W | YBL029W | YBR137W   | YBR137W | 0.5203 | 0.0694  |
| YFR047C | BNA6    | YLR442C   | SIR3    | 0.5203 | -0.2762 |
| YGR258C | RAD2    | YBR077C   | SLM4    | 0.5202 | -0.1614 |
| YDR351W | SBE2    | YLR389C   | STE23   | 0.5201 | 0.0409  |
| YJR084W | YJR084W | YJL218W   | YJL218W | 0.5200 | -0.0201 |
| YLR248W | RCK2    | YML096W   | YML096W | 0.5199 | -0.2554 |
| YER186C | YER186C | YHR063C   | PAN5    | 0.5194 | -0.1607 |
| YOR054C | VHS3    | YFL016C   | MDJ1    | 0.5194 | 0.2036  |
| YFR013W | IOC3    | YOL104C   | NDJ1    | 0.5193 | -0.0110 |
| YIL119C | RPI1    | YLR452C   | SST2    | 0.5193 | -0.1173 |
| YOL097C | WRS1    | YPL237W   | SUI3    | 0.5192 | 0.3817  |
| YGR149W | GPC1    | YER144C   | UBP5    | 0.5191 | 0.1243  |
| YGR209C | TRX2    | YOL073C   | DSC2    | 0.5190 | 0.1939  |
| YBR037C | SCO1    | YOL062C   | APM4    | 0.5188 | 0.1942  |
| YOR251C | TUM1    | YIR022W   | SEC11   | 0.5184 | 0.3682  |
| YLR287C | YLR287C | YER186C   | YER186C | 0.5183 | 0.1716  |
| YOL018C | TLG2    | YML004C   | GLO1    | 0.5179 | 0.0607  |
| YBL040C | ERD2    | YCL024W   | KCC4    | 0.5177 | -0.1025 |
| YGR207C | CIR1    | YHL007C   | STE20   | 0.5176 | -0.2630 |
| YBR274W | CHK1    | YBR077C   | SLM4    | 0.5173 | 0.1185  |
| YNR012W | URK1    | YNL280C   | ERG24   | 0.5172 | 0.2477  |
| YOL026C | MIM1    | YML098W   | TAF13   | 0.5170 | 0.2215  |
| YOR117W | RPT5    | YGL051W   | MST27   | 0.5169 | 0.1865  |
| YNL135C | FPR1    | YLR330W   | CHS5    | 0.5165 | -0.1378 |
| YEL064C | AVT2    | YHR023W   | MYO1    | 0.5162 | 0.0305  |
| YEL021W | URA3    | YFR004W   | RPN11   | 0.5161 | 0.2854  |
| YOL092W | YPQ1    | YNL046W   | YNL046W | 0.5157 | 0.1156  |

|         |         |           |         |        |         |
|---------|---------|-----------|---------|--------|---------|
| YIL040W | APQ12   | YBR121C   | GRS1    | 0.5156 | -0.0370 |
| YHR027C | RPN1    | YER020W   | GPA2    | 0.5155 | -0.1777 |
| YLR059C | REX2    | YDR319C   | YFT2    | 0.5155 | 0.1741  |
| YLR442C | SIR3    | YLR057W   | MNL2    | 0.5154 | 0.2358  |
| YBR168W | PEX32   | YOR127W   | RGA1    | 0.5153 | -0.2187 |
| YDL002C | NHP10   | YLL035W   | GRC3    | 0.5150 | -0.3234 |
| YGR209C | TRX2    | YGL226C-A | OST5    | 0.5150 | 0.0175  |
| YGR184C | UBR1    | YIL040W   | APQ12   | 0.5144 | -0.2220 |
| YIL165C | YIL165C | YOR371C   | GPB1    | 0.5144 | 0.1409  |
| YDL180W | YDL180W | YOR043W   | WHI2    | 0.5143 | 0.0065  |
| YNL041C | COG6    | YJL051W   | IRC8    | 0.5140 | -0.2957 |
| YER150W | SPI1    | YLR258W   | GSY2    | 0.5138 | 0.1118  |
| YDR515W | SLF1    | YDR383C   | NKP1    | 0.5132 | 0.2225  |
| YOL062C | APM4    | YDR134C   | YDR134C | 0.5132 | -0.1515 |
| YDR515W | SLF1    | YOL092W   | YPQ1    | 0.5130 | -0.1888 |
| YGR023W | MTL1    | YLR342W   | FKS1    | 0.5128 | 0.2744  |
| YER019W | ISC1    | YLR443W   | ECM7    | 0.5127 | 0.1891  |
| YML079W | YML079W | YMR152W   | YIM1    | 0.5127 | 0.1028  |
| YLL040C | VPS13   | YHR016C   | YSC84   | 0.5125 | 0.2988  |
| YGL192W | IME4    | YGL193C   | YGL193C | 0.5124 | 0.2363  |
| YJL212C | OPT1    | YMR005W   | TAF4    | 0.5117 | 0.0856  |
| YBR132C | AGP2    | YNL321W   | VNX1    | 0.5115 | -0.0620 |
| YDR319C | YFT2    | YCL009C   | ILV6    | 0.5114 | 0.0283  |
| YBR161W | CSH1    | YBL040C   | ERD2    | 0.5113 | 0.2576  |
| YNR034W | SOL1    | YOR131C   | YOR131C | 0.5112 | 0.0926  |
| YFL047W | RGD2    | YER186C   | YER186C | 0.5110 | 0.1940  |
| YKL184W | SPE1    | YOL062C   | APM4    | 0.5105 | 0.1315  |
| YBR196C | PGI1    | YOR101W   | RAS1    | 0.5102 | -0.1745 |
| YBR071W | YBR071W | YNL024C   | EFM6    | 0.5101 | -0.1477 |
| YJR040W | GEF1    | YNL329C   | PEX6    | 0.5101 | 0.1131  |
| YLR059C | REX2    | YER185W   | PUG1    | 0.5101 | -0.1536 |
| YOL062C | APM4    | YBR166C   | TYR1    | 0.5101 | 0.1337  |
| YDR178W | SDH4    | YHR033W   | YHR033W | 0.5100 | 0.3133  |
| YML071C | COG8    | YNL215W   | IES2    | 0.5100 | 0.1649  |
| YGL053W | PRM8    | YER185W   | PUG1    | 0.5097 | 0.1767  |
| YIL061C | SNP1    | YBR229C   | ROT2    | 0.5095 | -0.0774 |
| YJL154C | VPS35   | YML036W   | CGI121  | 0.5092 | -0.1861 |
| YDL089W | NUR1    | YGL178W   | MPT5    | 0.5091 | 0.2069  |
| YLR206W | ENT2    | YOR054C   | VHS3    | 0.5086 | 0.0270  |
| YOL081W | IRA2    | YPL071C   | YPL071C | 0.5086 | -0.2865 |
| YER144C | UBP5    | YDL133W   | SRF1    | 0.5084 | 0.2158  |
| YGL025C | PGD1    | YPL031C   | PHO85   | 0.5084 | 0.1761  |
| YOR264W | DSE3    | YGR149W   | GPC1    | 0.5084 | 0.0180  |
| YLR231C | BNA5    | YHL048W   | COS8    | 0.5083 | 0.2391  |
| YDL164C | CDC9    | YDL211C   | YDL211C | 0.5082 | 0.0889  |
| YKL116C | PRR1    | YGR157W   | CHO2    | 0.5078 | 0.1062  |
| YBR249C | ARO4    | YOL097C   | WRS1    | 0.5076 | 0.1167  |

|         |         |         |         |        |         |
|---------|---------|---------|---------|--------|---------|
| YJL047C | RTT101  | YER023W | PRO3    | 0.5076 | -0.1320 |
| YEL055C | POL5    | YLR172C | DPH5    | 0.5075 | 0.3240  |
| YDL135C | RDI1    | YDL132W | CDC53   | 0.5074 | 0.0954  |
| YIR022W | SEC11   | YJL149W | DAS1    | 0.5070 | -0.2825 |
| YLR064W | PER33   | YOR092W | ECM3    | 0.5070 | 0.2097  |
| YKR051W | YKR051W | YEL064C | AVT2    | 0.5069 | 0.1930  |
| YCL009C | ILV6    | YLR052W | IES3    | 0.5068 | -0.2125 |
| YBL020W | RFT1    | YBL105C | PKC1    | 0.5066 | 0.1220  |
| YEL021W | URA3    | YGL176C | YGL176C | 0.5066 | 0.0794  |
| YLR096W | KIN2    | YEL064C | AVT2    | 0.5059 | -0.0929 |
| YNR034W | SOL1    | YDR530C | APA2    | 0.5059 | 0.1551  |
| YOR051C | ETT1    | YBR071W | YBR071W | 0.5056 | -0.1127 |
| YHR054C | YHR054C | YPL058C | PDR12   | 0.5055 | 0.1182  |
| YDL132W | CDC53   | YER116C | SLX8    | 0.5054 | 0.0165  |
| YBR222C | PCS60   | YOL093W | TRM10   | 0.5053 | -0.2805 |
| YOL062C | APM4    | YOR196C | LIP5    | 0.5053 | 0.0842  |
| YDL047W | SIT4    | YDR524C | AGE1    | 0.5052 | 0.0888  |
| YGL207W | SPT16   | YGL208W | SIP2    | 0.5052 | -0.1631 |
| YGR150C | CCM1    | YDL111C | RRP42   | 0.5050 | -0.1069 |
| YDL116W | NUP84   | YGL176C | YGL176C | 0.5049 | 0.3060  |
| YOR144C | ELG1    | YGR208W | SER2    | 0.5048 | 0.1779  |
| YLR257W | YLR257W | YLR248W | RCK2    | 0.5043 | 0.2104  |
| YGR289C | MAL11   | YDL150W | RPC53   | 0.5038 | -0.0975 |
| YHR027C | RPN1    | YLR430W | SEN1    | 0.5038 | 0.0189  |
| YIL142W | CCT2    | YLR172C | DPH5    | 0.5038 | 0.0017  |
| YDR441C | APT2    | YBR157C | ICS2    | 0.5036 | -0.0121 |
| YBR087W | RFC5    | YBR274W | CHK1    | 0.5033 | 0.3093  |
| YGL192W | IME4    | YOL164W | BDS1    | 0.5033 | 0.2246  |
| YPL147W | PXA1    | YBL089W | AVT5    | 0.5030 | 0.0544  |
| YJL149W | DAS1    | YKL116C | PRR1    | 0.5027 | 0.0707  |
| YMR115W | MGR3    | YIL112W | HOS4    | 0.5027 | -0.2042 |
| YFR011C | MIC19   | YLR046C | YLR046C | 0.5024 | -0.2087 |
| YMR005W | TAF4    | YNL138W | SRV2    | 0.5024 | -0.1051 |
| YPL233W | NSL1    | YMR112C | MED11   | 0.5018 | -0.3436 |
| YBR163W | EXO5    | YLR180W | SAM1    | 0.5016 | 0.2455  |
| YCL018W | LEU2    | YJR040W | GEF1    | 0.5016 | 0.0230  |
| YBR163W | EXO5    | YOR264W | DSE3    | 0.5013 | 0.2320  |
| YLR176C | RFX1    | YPL058C | PDR12   | 0.5013 | -0.0861 |
| YLR064W | PER33   | YKL096W | CWP1    | 0.5012 | 0.0749  |
| YJL217W | REE1    | YOL089C | HAL9    | 0.5010 | 0.0416  |
| YGL051W | MST27   | YDL116W | NUP84   | 0.5008 | 0.2002  |
| YDL155W | CLB3    | YJL187C | SWE1    | 0.5004 | 0.0930  |
| YBL014C | RRN6    | YBL079W | NUP170  | 0.5002 | 0.1368  |
| YGL257C | MNT2    | YGL035C | MIG1    | 0.4997 | -0.1049 |
| YLR449W | FPR4    | YJR068W | RFC2    | 0.4997 | 0.2779  |
| YOR080W | DIA2    | YER037W | PHM8    | 0.4997 | 0.1083  |
| YOL062C | APM4    | YLL035W | GRC3    | 0.4996 | 0.1431  |

|         |         |         |         |        |         |
|---------|---------|---------|---------|--------|---------|
| YGR006W | PRP18   | YIL061C | SNP1    | 0.4995 | 0.0828  |
| YFL049W | SWP82   | YLR258W | GSY2    | 0.4991 | 0.1552  |
| YLL024C | SSA2    | YKL116C | PRR1    | 0.4990 | 0.1278  |
| YNL124W | NAF1    | YJL208C | NUC1    | 0.4990 | 0.1163  |
| YML038C | YMD8    | YML036W | CGI121  | 0.4987 | 0.1982  |
| YJL149W | DAS1    | YML016C | PPZ1    | 0.4983 | 0.1593  |
| YJR084W | YJR084W | YGR012W | MCY1    | 0.4982 | 0.1221  |
| YBR225W | YBR225W | YIL158W | AIM20   | 0.4981 | -0.1399 |
| YER035W | EDC2    | YJR032W | CPR7    | 0.4977 | -0.1694 |
| YGL051W | MST27   | YBR157C | ICS2    | 0.4977 | -0.1058 |
| YJL178C | ATG27   | YNL215W | IES2    | 0.4977 | 0.0219  |
| YJR084W | YJR084W | YLR057W | MNL2    | 0.4976 | -0.0949 |
| YBR071W | YBR071W | YIL066C | RNR3    | 0.4975 | -0.1884 |
| YOL164W | BDS1    | YDL111C | RRP42   | 0.4975 | 0.0967  |
| YJL047C | RTT101  | YLR430W | SEN1    | 0.4972 | 0.1148  |
| YJL208C | NUC1    | YNL124W | NAF1    | 0.4971 | 0.2499  |
| YFL016C | MDJ1    | YER020W | GPA2    | 0.4966 | 0.0954  |
| YBR121C | GRS1    | YIL046W | MET30   | 0.4963 | -0.1224 |
| YDR513W | GRX2    | YML079W | YML079W | 0.4963 | 0.2278  |
| YJL051W | IRC8    | YGL242C | YGL242C | 0.4962 | -0.1474 |
| YDR321W | ASP1    | YIL089W | YIL089W | 0.4957 | -0.0363 |
| YEL058W | PCM1    | YFL047W | RGD2    | 0.4957 | 0.1452  |
| YIL089W | YIL089W | YER185W | PUG1    | 0.4954 | -0.0091 |
| YLR057W | MNL2    | YNL074C | MLF3    | 0.4949 | 0.0221  |
| YDL147W | RPN5    | YBL030C | PET9    | 0.4948 | -0.1737 |
| YDL116W | NUP84   | YNR034W | SOL1    | 0.4946 | -0.1230 |
| YHR115C | DMA1    | YML013W | UBX2    | 0.4943 | 0.0576  |
| YNL322C | KRE1    | YMR115W | MGR3    | 0.4941 | -0.0718 |
| YDR420W | HKR1    | YPL058C | PDR12   | 0.4935 | 0.0567  |
| YLR059C | REX2    | YNL321W | VNX1    | 0.4935 | 0.1328  |
| YNL138W | SRV2    | YNL074C | MLF3    | 0.4934 | 0.0815  |
| YOR092W | ECM3    | YLR342W | FKS1    | 0.4934 | 0.1481  |
| YAL051W | OAF1    | YJL149W | DAS1    | 0.4933 | 0.1126  |
| YPL064C | CWC27   | YJR032W | CPR7    | 0.4933 | 0.0204  |
| YBL014C | RRN6    | YLR452C | SST2    | 0.4930 | -0.1680 |
| YDR351W | SBE2    | YNL041C | COG6    | 0.4930 | 0.0515  |
| YDR497C | ITR1    | YLR368W | MDM30   | 0.4930 | -0.2964 |
| YER186C | YER186C | YGR023W | MTL1    | 0.4930 | -0.0881 |
| YNL280C | ERG24   | YER186C | YER186C | 0.4924 | -0.2413 |
| YGL004C | RPN14   | YGL169W | SUA5    | 0.4922 | -0.1182 |
| YDR058C | TGL2    | YNL135C | FPR1    | 0.4920 | -0.1448 |
| YLR237W | THI7    | YML016C | PPZ1    | 0.4916 | -0.1012 |
| YLR442C | SIR3    | YJL030W | MAD2    | 0.4913 | 0.1199  |
| YMR192W | GYL1    | YPL147W | PXA1    | 0.4911 | 0.0004  |
| YPL147W | PXA1    | YGL176C | YGL176C | 0.4911 | 0.1262  |
| YBR229C | ROT2    | YIL061C | SNP1    | 0.4910 | -0.2013 |
| YHR033W | YHR033W | YDR134C | YDR134C | 0.4907 | 0.1371  |

|         |         |         |         |        |         |
|---------|---------|---------|---------|--------|---------|
| YKL067W | YNK1    | YML007W | YAP1    | 0.4907 | -0.2082 |
| YLR231C | BNA5    | YBR239C | ERT1    | 0.4906 | 0.2178  |
| YML048W | GSF2    | YGL051W | MST27   | 0.4905 | 0.1952  |
| YML072C | TCB3    | YMR215W | GAS3    | 0.4903 | 0.1033  |
| YJL204C | RCY1    | YER088C | DOT6    | 0.4901 | 0.0823  |
| YEL056W | HAT2    | YOR088W | YOR088W | 0.4900 | 0.2195  |
| YBR147W | RTC2    | YLL024C | SSA2    | 0.4899 | -0.1580 |
| YGR012W | MCY1    | YOR048C | RAT1    | 0.4899 | 0.0255  |
| YGR222W | PET54   | YGR194C | XKS1    | 0.4899 | 0.0675  |
| YOL130W | ALR1    | YBR137W | YBR137W | 0.4899 | -0.0507 |
| YLR368W | MDM30   | YOL088C | MPD2    | 0.4898 | 0.0940  |
| YFL018C | LPD1    | YLL035W | GRC3    | 0.4896 | -0.1763 |
| YJL140W | RPB4    | YDR351W | SBE2    | 0.4896 | -0.0743 |
| YDL002C | NHP10   | YDL147W | RPN5    | 0.4894 | 0.1362  |
| YGR194C | XKS1    | YHR104W | GRE3    | 0.4888 | 0.2549  |
| YHR039C | MSC7    | YML007W | YAP1    | 0.4888 | -0.1063 |
| YEL058W | PCM1    | YHR039C | MSC7    | 0.4887 | 0.0786  |
| YMR154C | RIM13   | YDR321W | ASP1    | 0.4886 | -0.0024 |
| YHR115C | DMA1    | YBR008C | FLR1    | 0.4882 | 0.1426  |
| YIL061C | SNP1    | YOR371C | GPB1    | 0.4880 | 0.1487  |
| YGR209C | TRX2    | YOR103C | OST2    | 0.4879 | 0.1340  |
| YKL110C | KTI12   | YGR158C | MTR3    | 0.4878 | 0.1239  |
| YLR231C | BNA5    | YFL047W | RGD2    | 0.4874 | 0.0724  |
| YGL176C | YGL176C | YDL116W | NUP84   | 0.4873 | 0.2244  |
| YGR208W | SER2    | YGR207C | CIR1    | 0.4872 | 0.1261  |
| YMR112C | MED11   | YPL031C | PHO85   | 0.4871 | 0.1533  |
| YBR067C | TIP1    | YLL028W | TPO1    | 0.4870 | 0.0032  |
| YEL021W | URA3    | YPL016W | SWI1    | 0.4868 | 0.0114  |
| YCR041W | YCR041W | YGL051W | MST27   | 0.4866 | 0.1621  |
| YLR368W | MDM30   | YOL094C | RFC4    | 0.4866 | -0.0906 |
| YNL326C | PFA3    | YOR371C | GPB1    | 0.4864 | -0.1734 |
| YGR023W | MTL1    | YGL035C | MIG1    | 0.4862 | 0.1289  |
| YHR054C | YHR054C | YMR115W | MGR3    | 0.4861 | -0.0916 |
| YBL017C | PEP1    | YBL089W | AVT5    | 0.4860 | 0.0119  |
| YJL154C | VPS35   | YGR184C | UBR1    | 0.4859 | 0.0945  |
| YJL154C | VPS35   | YNL135C | FPR1    | 0.4858 | -0.0096 |
| YJL140W | RPB4    | YLR057W | MNL2    | 0.4858 | -0.1256 |
| YKL125W | RRN3    | YPL237W | SUI3    | 0.4856 | 0.0935  |
| YGL051W | MST27   | YPL226W | NEW1    | 0.4853 | 0.0560  |
| YER150W | SPI1    | YLR172C | DPH5    | 0.4852 | -0.3567 |
| YDL002C | NHP10   | YGR168C | YGR168C | 0.4849 | 0.1799  |
| YBR008C | FLR1    | YBR077C | SLM4    | 0.4848 | 0.1064  |
| YOL088C | MPD2    | YBR161W | CSH1    | 0.4846 | 0.1744  |
| YKL019W | RAM2    | YJL140W | RPB4    | 0.4844 | 0.0640  |
| YGR001C | EFM5    | YJL036W | SNX4    | 0.4840 | -0.1273 |
| YJL163C | YJL163C | YIL089W | YIL089W | 0.4838 | 0.2997  |
| YLR435W | TSR2    | YKL125W | RRN3    | 0.4838 | 0.2965  |



|         |         |           |         |        |         |
|---------|---------|-----------|---------|--------|---------|
| YPL064C | CWC27   | YPL071C   | YPL071C | 0.4838 | 0.1675  |
| YGL025C | PGD1    | YLR206W   | ENT2    | 0.4837 | 0.0592  |
| YHR034C | PIH1    | YAR028W   | YAR028W | 0.4836 | -0.1124 |
| YMR215W | GAS3    | YOR103C   | OST2    | 0.4833 | 0.2453  |
| YKL021C | MAK11   | YOL093W   | TRM10   | 0.4830 | 0.4156  |
| YER046W | SPO73   | YDL103C   | QRI1    | 0.4828 | -0.1193 |
| YBR229C | ROT2    | YBR157C   | ICS2    | 0.4827 | 0.3228  |
| YDR178W | SDH4    | YFL018C   | LPD1    | 0.4827 | 0.1754  |
| YJL204C | RCY1    | YML048W   | GSF2    | 0.4826 | 0.1676  |
| YDL171C | GLT1    | YEL071W   | DLD3    | 0.4825 | 0.0414  |
| YEL064C | AVT2    | YDR134C   | YDR134C | 0.4824 | 0.1046  |
| YOR088W | YOR088W | YBL007C   | SLA1    | 0.4822 | 0.0455  |
| YML038C | YMD8    | YML071C   | COG8    | 0.4820 | 0.2255  |
| YML036W | CGI121  | YML038C   | YMD8    | 0.4817 | 0.0928  |
| YLR342W | FKS1    | YJL204C   | RCY1    | 0.4816 | 0.2848  |
| YCR071C | IMG2    | YBR037C   | SCO1    | 0.4815 | 0.1316  |
| YDL147W | RPN5    | YDR383C   | NKP1    | 0.4813 | 0.1547  |
| YPL009C | RQC2    | YPL071C   | YPL071C | 0.4813 | -0.0882 |
| YFL049W | SWP82   | YER022W   | SRB4    | 0.4809 | 0.1827  |
| YJL208C | NUC1    | YPL012W   | RRP12   | 0.4808 | 0.2509  |
| YOR043W | WHI2    | YHR050W   | SMF2    | 0.4808 | 0.1882  |
| YML048W | GSF2    | YLR180W   | SAM1    | 0.4806 | 0.0665  |
| YOL018C | TLG2    | YER022W   | SRB4    | 0.4803 | 0.1102  |
| YLL028W | TPO1    | YNL321W   | VNX1    | 0.4800 | 0.0592  |
| YDL135C | RDI1    | YKR085C   | MRPL20  | 0.4798 | 0.0851  |
| YDR319C | YFT2    | YPL144W   | POC4    | 0.4796 | 0.1326  |
| YLR206W | ENT2    | YEL076W-C | Unknown | 0.4795 | -0.0869 |
| YOL164W | BDS1    | YNL329C   | PEX6    | 0.4795 | 0.1241  |
| YDL002C | NHP10   | YDR383C   | NKP1    | 0.4793 | 0.2022  |
| YLR176C | RFX1    | YOR103C   | OST2    | 0.4791 | 0.1407  |
| YBR037C | SCO1    | YKR085C   | MRPL20  | 0.4790 | 0.0805  |
| YEL064C | AVT2    | YIL061C   | SNP1    | 0.4789 | 0.0571  |
| YGR023W | MTL1    | YLR206W   | ENT2    | 0.4787 | 0.0959  |
| YBR121C | GRS1    | YGL195W   | GCN1    | 0.4786 | 0.0334  |
| YDR178W | SDH4    | YLR248W   | RCK2    | 0.4785 | 0.2907  |
| YPL031C | PHO85   | YKL019W   | RAM2    | 0.4785 | 0.1007  |
| YLR287C | YLR287C | YPL237W   | SUI3    | 0.4780 | 0.3347  |
| YBL029W | YBL029W | YOL147C   | PEX11   | 0.4779 | 0.1234  |
| YGL242C | YGL242C | YLR330W   | CHS5    | 0.4779 | 0.1082  |
| YJR025C | BNA1    | YLR064W   | PER33   | 0.4777 | -0.1847 |
| YPL234C | VMA11   | YPL064C   | CWC27   | 0.4777 | 0.1312  |
| YOR054C | VHS3    | YLR443W   | ECM7    | 0.4776 | 0.1355  |
| YML121W | GTR1    | YBR121C   | GRS1    | 0.4775 | -0.1621 |
| YPL234C | VMA11   | YHR027C   | RPN1    | 0.4773 | 0.1586  |
| YER019W | ISC1    | YKL019W   | RAM2    | 0.4772 | 0.0903  |
| YKL019W | RAM2    | YML091C   | RPM2    | 0.4772 | -0.1036 |
| YHR039C | MSC7    | YLR375W   | STP3    | 0.4770 | -0.2313 |

|         |         |         |         |        |         |
|---------|---------|---------|---------|--------|---------|
| YJR086W | STE18   | YFL047W | RGD2    | 0.4770 | 0.1156  |
| YBR071W | YBR071W | YDR178W | SDH4    | 0.4769 | 0.0435  |
| YML038C | YMD8    | YML098W | TAF13   | 0.4766 | 0.1096  |
| YMR154C | RIM13   | YLR449W | FPR4    | 0.4765 | -0.1295 |
| YGR152C | RSR1    | YJR056C | YJR056C | 0.4763 | 0.2036  |
| YHR016C | YSC84   | YOR088W | YOR088W | 0.4763 | 0.3981  |
| YDR180W | SCC2    | YDL211C | YDL211C | 0.4761 | 0.2529  |
| YIL009W | FAA3    | YDR420W | HKR1    | 0.4758 | 0.0000  |
| YCL009C | ILV6    | YDL171C | GLT1    | 0.4757 | 0.1444  |
| YML048W | GSF2    | YPL064C | CWC27   | 0.4754 | -0.0839 |
| YBL030C | PET9    | YBL020W | RFT1    | 0.4749 | 0.0502  |
| YLR155C | ASP3-1  | YBR077C | SLM4    | 0.4749 | 0.0603  |
| YJL149W | DAS1    | YLL040C | VPS13   | 0.4747 | 0.1094  |
| YFL056C | AAD6    | YOR196C | LIP5    | 0.4746 | 0.1097  |
| YLL024C | SSA2    | YBR147W | RTC2    | 0.4744 | -0.0254 |
| YOR043W | WHI2    | YLR052W | IES3    | 0.4744 | 0.1012  |
| YGR150C | CCM1    | YNL135C | FPR1    | 0.4738 | -0.1302 |
| YLR426W | TDA5    | YER186C | YER186C | 0.4738 | 0.0636  |
| YDL211C | YDL211C | YDL164C | CDC9    | 0.4734 | 0.1313  |
| YLR248W | RCK2    | YKR051W | YKR051W | 0.4734 | 0.0927  |
| YHL007C | STE20   | YDL171C | GLT1    | 0.4732 | 0.2057  |
| YER046W | SPO73   | YBR077C | SLM4    | 0.4729 | 0.1313  |
| YEL064C | AVT2    | YIL119C | RPI1    | 0.4728 | -0.1463 |
| YNL326C | PFA3    | YCL024W | KCC4    | 0.4726 | 0.0136  |
| YNL074C | MLF3    | YNL329C | PEX6    | 0.4725 | 0.2361  |
| YBR163W | EXO5    | YBR249C | ARO4    | 0.4724 | 0.0522  |
| YHR016C | YSC84   | YGL208W | SIP2    | 0.4722 | 0.2489  |
| YDR531W | CAB1    | YBR249C | ARO4    | 0.4720 | 0.0021  |
| YMR010W | ANY1    | YER023W | PRO3    | 0.4720 | 0.1110  |
| YDL135C | RDI1    | YOR048C | RAT1    | 0.4718 | 0.0611  |
| YBR069C | TAT1    | YNR034W | SOL1    | 0.4717 | -0.2066 |
| YIL066C | RNR3    | YHR054C | YHR054C | 0.4717 | -0.1467 |
| YMR046C | YMR046C | YFL018C | LPD1    | 0.4717 | -0.1513 |
| YBR154C | RPB5    | YBR239C | ERT1    | 0.4716 | 0.3342  |
| YBR196C | PGI1    | YGL035C | MIG1    | 0.4715 | -0.0744 |
| YOR117W | RPT5    | YBR121C | GRS1    | 0.4715 | 0.0338  |
| YGR222W | PET54   | YGR150C | CCM1    | 0.4712 | 0.0796  |
| YOL026C | MIM1    | YGR209C | TRX2    | 0.4712 | 0.0075  |
| YCR031C | RPS14a  | YLR455W | PDP3    | 0.4711 | 0.1978  |
| YCR071C | IMG2    | YLL061W | MMP1    | 0.4711 | -0.1210 |
| YLR057W | MNL2    | YGR023W | MTL1    | 0.4711 | 0.1931  |
| YDR339C | FCF1    | YIL133C | RPL16a  | 0.4710 | 0.2521  |
| YLR389C | STE23   | YJL140W | RPB4    | 0.4710 | -0.0430 |
| YML072C | TCB3    | YBR126C | TPS1    | 0.4708 | 0.1111  |
| YPL001W | HAT1    | YBR067C | TIP1    | 0.4706 | -0.2137 |
| YEL055C | POL5    | YOL097C | WRS1    | 0.4703 | 0.1613  |
| YDR441C | APT2    | YMR046C | YMR046C | 0.4695 | -0.1297 |

|         |         |         |         |        |         |
|---------|---------|---------|---------|--------|---------|
| YER026C | CHO1    | YKR075C | YKR075C | 0.4693 | -0.2264 |
| YJR068W | RFC2    | YJL126W | NIT2    | 0.4692 | 0.1310  |
| YIL119C | RPI1    | YDR441C | APT2    | 0.4690 | -0.2220 |
| YER020W | GPA2    | YGL025C | PGD1    | 0.4689 | 0.2540  |
| YHR033W | YHR033W | YKL183W | LOT5    | 0.4689 | -0.1449 |
| YML072C | TCB3    | YOR117W | RPT5    | 0.4688 | 0.1328  |
| YBR121C | GRS1    | YML121W | GTR1    | 0.4686 | -0.3563 |
| YOL097C | WRS1    | YER049W | TPA1    | 0.4685 | 0.2245  |
| YOR196C | LIP5    | YEL056W | HAT2    | 0.4685 | 0.1516  |
| YJL171C | TOH1    | YMR067C | UBX4    | 0.4683 | -0.0671 |
| YFR004W | RPN11   | YOR048C | RAT1    | 0.4682 | 0.1552  |
| YDR134C | YDR134C | YJL208C | NUC1    | 0.4681 | -0.1379 |
| YMR067C | UBX4    | YGL193C | YGL193C | 0.4677 | -0.1432 |
| YDL227C | Ho      | YIL082W | Unknown | 0.4673 | 0.0382  |
| YFL016C | MDJ1    | YGL176C | YGL176C | 0.4673 | -0.2047 |
| YOR144C | ELG1    | YJR056C | YJR056C | 0.4673 | 0.2749  |
| YER023W | PRO3    | YMR010W | ANY1    | 0.4672 | 0.1904  |
| YIR028W | DAL4    | YBR166C | TYR1    | 0.4672 | 0.1460  |
| YJR103W | URA8    | YKL067W | YNK1    | 0.4672 | 0.1173  |
| YNL322C | KRE1    | YPL031C | PHO85   | 0.4672 | 0.0525  |
| YNL321W | VNX1    | YML072C | TCB3    | 0.4672 | 0.2035  |
| YDL111C | RRP42   | YMR209C | YMR209C | 0.4670 | 0.1929  |
| YDR528W | HLR1    | YOR264W | DSE3    | 0.4667 | -0.0999 |
| YOL164W | BDS1    | YGL192W | IME4    | 0.4667 | 0.0219  |
| YCL024W | KCC4    | YFL016C | MDJ1    | 0.4666 | 0.2349  |
| YKR075C | YKR075C | YER026C | CHO1    | 0.4665 | -0.0851 |
| YGR006W | PRP18   | YOR371C | GPB1    | 0.4662 | 0.1142  |
| YNL215W | IES2    | YOL093W | TRM10   | 0.4662 | 0.0070  |
| YNL138W | SRV2    | YNL322C | KRE1    | 0.4661 | 0.1060  |
| YOL147C | PEX11   | YBR069C | TAT1    | 0.4661 | 0.0350  |
| YPL058C | PDR12   | YER116C | SLX8    | 0.4661 | -0.1236 |
| YOL062C | APM4    | YKL184W | SPE1    | 0.4660 | 0.0524  |
| YJR086W | STE18   | YNL041C | COG6    | 0.4656 | 0.1902  |
| YDL180W | YDL180W | YOL113W | SKM1    | 0.4654 | 0.0024  |
| YLR330W | CHS5    | YNL280C | ERG24   | 0.4654 | -0.1114 |
| YMR209C | YMR209C | YGR001C | EFM5    | 0.4649 | 0.1154  |
| YLR287C | YLR287C | YIR026C | YVH1    | 0.4645 | 0.3219  |
| YPR015C | YPR015C | YBR087W | RFC5    | 0.4645 | -0.0845 |
| YGR222W | PET54   | YGL051W | MST27   | 0.4644 | 0.3078  |
| YKL183W | LOT5    | YPL234C | VMA11   | 0.4644 | 0.0761  |
| YNL124W | NAF1    | YAR027W | UIP3    | 0.4644 | -0.1708 |
| YOL088C | MPD2    | YER116C | SLX8    | 0.4642 | 0.2254  |
| YOR196C | LIP5    | YOL062C | APM4    | 0.4641 | 0.1886  |
| YPL233W | NSL1    | YJL149W | DAS1    | 0.4641 | 0.1241  |
| YPL016W | SWI1    | YNL135C | FPR1    | 0.4640 | -0.1587 |
| YDL132W | CDC53   | YBR077C | SLM4    | 0.4638 | 0.0666  |
| YOL062C | APM4    | YKR051W | YKR051W | 0.4638 | 0.1604  |

|           |         |         |         |        |         |
|-----------|---------|---------|---------|--------|---------|
| YAR028W   | YAR028W | YBR196C | PGI1    | 0.4637 | 0.1514  |
| YOR033C   | EXO1    | YER022W | SRB4    | 0.4634 | 0.1223  |
| YJR088C   | EMC2    | YNL138W | SRV2    | 0.4633 | 0.1807  |
| YLR057W   | MNL2    | YBR069C | TAT1    | 0.4633 | 0.1395  |
| YPL071C   | YPL071C | YJL171C | TOH1    | 0.4632 | -0.1567 |
| YJL140W   | RPB4    | YKL160W | ELF1    | 0.4631 | 0.0142  |
| YNL215W   | IES2    | YML007W | YAP1    | 0.4630 | 0.1293  |
| YKL092C   | BUD2    | YOL089C | HAL9    | 0.4628 | 0.1251  |
| YOL147C   | PEX11   | YGL025C | PGD1    | 0.4628 | -0.0008 |
| YBR249C   | ARO4    | YBR166C | TYR1    | 0.4627 | 0.2528  |
| YFR047C   | BNA6    | YER150W | SPI1    | 0.4627 | 0.0548  |
| YGL257C   | MNT2    | YOR127W | RGA1    | 0.4627 | 0.0341  |
| YNL329C   | PEX6    | YDL217C | TIM22   | 0.4627 | 0.1006  |
| YJR056C   | YJR056C | YPL183C | RTT10   | 0.4626 | 0.0052  |
| YML079W   | YML079W | YLR047C | FRE8    | 0.4624 | -0.1392 |
| YMR152W   | YIM1    | YML079W | YML079W | 0.4624 | 0.0412  |
| YLL035W   | GRC3    | YOL062C | APM4    | 0.4621 | 0.1075  |
| YDR528W   | HLR1    | YLR237W | THI7    | 0.4620 | 0.2066  |
| YHR104W   | GRE3    | YPL031C | PHO85   | 0.4620 | 0.2040  |
| YBR121C   | GRS1    | YBL079W | NUP170  | 0.4617 | 0.3119  |
| YGL025C   | PGD1    | YAR028W | YAR028W | 0.4615 | -0.0950 |
| YJL030W   | MAD2    | YMR112C | MED11   | 0.4614 | 0.2930  |
| YLR389C   | STE23   | YLR342W | FKS1    | 0.4614 | 0.0852  |
| YKL116C   | PRR1    | YJL149W | DAS1    | 0.4613 | 0.1128  |
| YBR137W   | YBR137W | YBR077C | SLM4    | 0.4612 | 0.1987  |
| YLR330W   | CHS5    | YPL071C | YPL071C | 0.4612 | -0.0778 |
| YDL133W   | SRF1    | YAL009W | SPO7    | 0.4610 | 0.0750  |
| YOL164W   | BDS1    | YLR389C | STE23   | 0.4610 | 0.0297  |
| YMR005W   | TAF4    | YDL171C | GLT1    | 0.4609 | -0.0477 |
| YER182W   | FMP10   | YGL195W | GCN1    | 0.4606 | -0.1792 |
| YOL088C   | MPD2    | YER022W | SRB4    | 0.4605 | 0.1470  |
| YGL051W   | MST27   | YOR251C | TUM1    | 0.4604 | -0.0714 |
| YBL020W   | RFT1    | YBL030C | PET9    | 0.4603 | 0.0736  |
| YBR008C   | FLR1    | YBR222C | PCS60   | 0.4603 | 0.1606  |
| YCL026C-A | FRM2    | YDL002C | NHP10   | 0.4603 | 0.2834  |
| YDL217C   | TIM22   | YKL183W | LOT5    | 0.4602 | 0.1131  |
| YCR041W   | YCR041W | YJR103W | URA8    | 0.4601 | 0.0418  |
| YKL096W   | CWP1    | YDL116W | NUP84   | 0.4601 | -0.1566 |
| YNL024C   | EFM6    | YDR497C | ITR1    | 0.4601 | 0.1218  |
| YKL116C   | PRR1    | YML038C | YMD8    | 0.4600 | -0.2373 |
| YOR080W   | DIA2    | YDR058C | TGL2    | 0.4599 | 0.0474  |
| YMR115W   | MGR3    | YOR127W | RGA1    | 0.4596 | 0.1647  |
| YOR033C   | EXO1    | YPL226W | NEW1    | 0.4595 | 0.1107  |
| YOL089C   | HAL9    | YJL047C | RTT101  | 0.4594 | 0.1656  |
| YOL088C   | MPD2    | YOL094C | RFC4    | 0.4590 | 0.0445  |
| YJL126W   | NIT2    | YLR368W | MDM30   | 0.4589 | -0.2336 |
| YFL016C   | MDJ1    | YGL169W | SUA5    | 0.4588 | 0.1487  |

|         |         |           |         |        |         |
|---------|---------|-----------|---------|--------|---------|
| YOR092W | ECM3    | YGR207C   | CIR1    | 0.4586 | -0.1243 |
| YBL014C | RRN6    | YBR061C   | TRM7    | 0.4584 | 0.1011  |
| YGL025C | PGD1    | YNL321W   | VNX1    | 0.4580 | 0.0346  |
| YML036W | CGI121  | YMR123W   | PKR1    | 0.4580 | 0.1593  |
| YDL135C | RDI1    | YPL001W   | HAT1    | 0.4579 | -0.1951 |
| YHR063C | PAN5    | YHR023W   | MYO1    | 0.4579 | 0.0855  |
| YDR530C | APA2    | YDR528W   | HLR1    | 0.4576 | 0.0738  |
| YDR058C | TGL2    | YGR207C   | CIR1    | 0.4575 | 0.1047  |
| YLR342W | FKS1    | YOL081W   | IRA2    | 0.4575 | 0.0487  |
| YER019W | ISC1    | YDL167C   | NRP1    | 0.4574 | -0.0674 |
| YER049W | TPA1    | YKL021C   | MAK11   | 0.4573 | 0.2983  |
| YFL018C | LPD1    | YNL138W   | SRV2    | 0.4573 | 0.1625  |
| YJR084W | YJR084W | YGR001C   | EFM5    | 0.4573 | -0.1221 |
| YIL112W | HOS4    | YIL111W   | COX5b   | 0.4572 | 0.1883  |
| YGL051W | MST27   | YHR054C   | YHR054C | 0.4571 | -0.0103 |
| YMR158W | MRPS8   | YEL020W-A | TIM9    | 0.4570 | 0.0951  |
| YAL056W | GPB2    | YGR168C   | YGR168C | 0.4569 | -0.1681 |
| YJR068W | RFC2    | YLR449W   | FPR4    | 0.4568 | 0.0725  |
| YLL028W | TPO1    | YER088C   | DOT6    | 0.4568 | 0.0735  |
| YDL164C | CDC9    | YFL016C   | MDJ1    | 0.4567 | 0.0629  |
| YMR067C | UBX4    | YBR077C   | SLM4    | 0.4566 | -0.2164 |
| YGR150C | CCM1    | YGR012W   | MCY1    | 0.4560 | 0.1033  |
| YDL167C | NRP1    | YPL012W   | RRP12   | 0.4559 | 0.1193  |
| YDR513W | GRX2    | YOR048C   | RAT1    | 0.4555 | -0.2508 |
| YLR287C | YLR287C | YKL125W   | RRN3    | 0.4554 | 0.2646  |
| YFR047C | BNA6    | YLR096W   | KIN2    | 0.4553 | -0.2893 |
| YMR154C | RIM13   | YGL226W   | MTC3    | 0.4553 | 0.0001  |
| YGR149W | GPC1    | YLR258W   | GSY2    | 0.4552 | 0.0146  |
| YIL112W | HOS4    | YGL017W   | ATE1    | 0.4552 | 0.1384  |
| YLL061W | MMP1    | YOL093W   | TRM10   | 0.4550 | 0.0496  |
| YBR137W | YBR137W | YPL012W   | RRP12   | 0.4546 | -0.0867 |
| YJL187C | SWE1    | YHR050W   | SMF2    | 0.4543 | 0.0811  |
| YJR097W | JJJ3    | YLR047C   | FRE8    | 0.4541 | -0.1314 |
| YLL040C | VPS13   | YDR524C   | AGE1    | 0.4541 | -0.1832 |
| YML038C | YMD8    | YEL064C   | AVT2    | 0.4541 | 0.1379  |
| YDR038C | ENA5    | YIL009W   | FAA3    | 0.4540 | 0.0209  |
| YHR023W | MYO1    | YOR264W   | DSE3    | 0.4540 | 0.0010  |
| YCL024W | KCC4    | YOR131C   | YOR131C | 0.4539 | 0.2369  |
| YGL051W | MST27   | YMR112C   | MED11   | 0.4539 | -0.1861 |
| YBR132C | AGP2    | YIL009W   | FAA3    | 0.4537 | 0.1667  |
| YDR144C | MKC7    | YDR367W   | KEI1    | 0.4537 | 0.1795  |
| YFL049W | SWP82   | YER088C   | DOT6    | 0.4537 | -0.0375 |
| YBR222C | PCS60   | YNL138W   | SRV2    | 0.4536 | 0.1556  |
| YML013W | UBX2    | YHR115C   | DMA1    | 0.4536 | 0.1641  |
| YMR062C | ARG7    | YOR196C   | LIP5    | 0.4536 | 0.2447  |
| YNL326C | PFA3    | YJL126W   | NIT2    | 0.4536 | -0.1030 |
| YNL022C | RCM1    | YNR012W   | URK1    | 0.4535 | 0.3673  |

|           |         |         |         |        |         |
|-----------|---------|---------|---------|--------|---------|
| YGL242C   | YGL242C | YJL030W | MAD2    | 0.4532 | 0.1122  |
| YDR497C   | ITR1    | YLR181C | VTA1    | 0.4531 | -0.0013 |
| YGL193C   | YGL193C | YGL192W | IME4    | 0.4527 | 0.1086  |
| YIL066C   | RNR3    | YLL061W | MMP1    | 0.4526 | -0.1305 |
| YOL092W   | YPQ1    | YBL089W | AVT5    | 0.4526 | 0.1871  |
| YOL094C   | RFC4    | YMR005W | TAF4    | 0.4524 | 0.0625  |
| YGL226W   | MTC3    | YNR036C | MRPS12  | 0.4523 | 0.0921  |
| YLR052W   | IES3    | YLR046C | YLR046C | 0.4522 | -0.1409 |
| YNL135C   | FPR1    | YGR150C | CCM1    | 0.4522 | -0.1812 |
| YFR013W   | IOC3    | YER026C | CHO1    | 0.4520 | 0.1328  |
| YGR207C   | CIR1    | YJR068W | RFC2    | 0.4516 | 0.0032  |
| YLR231C   | BNA5    | YGL226W | MTC3    | 0.4516 | 0.0880  |
| YEL056W   | HAT2    | YOL147C | PEX11   | 0.4511 | -0.0685 |
| YEL068C   | YEL068C | YPL001W | HAT1    | 0.4510 | -0.0667 |
| YFL016C   | MDJ1    | YAL009W | SPO7    | 0.4510 | -0.1638 |
| YFR011C   | MIC19   | YJR086W | STE18   | 0.4509 | 0.0586  |
| YGR184C   | UBR1    | YEL068C | YEL068C | 0.4506 | -0.1133 |
| YNL329C   | PEX6    | YOR264W | DSE3    | 0.4505 | 0.0962  |
| YEL068C   | YEL068C | YJL149W | DAS1    | 0.4503 | -0.0782 |
| YLR452C   | SST2    | YHR050W | SMF2    | 0.4503 | -0.1975 |
| YLR056W   | ERG3    | YGR289C | MAL11   | 0.4501 | -0.0435 |
| YGL226C-A | OST5    | YDR420W | HKR1    | 0.4499 | -0.0052 |
| YNL326C   | PFA3    | YDR420W | HKR1    | 0.4498 | 0.0313  |
| YJR040W   | GEF1    | YOL073C | DSC2    | 0.4497 | 0.1498  |
| YLR257W   | YLR257W | YGR149W | GPC1    | 0.4497 | 0.2746  |
| YGR158C   | MTR3    | YJL126W | NIT2    | 0.4496 | 0.1986  |
| YPL009C   | RQC2    | YFR004W | RPN11   | 0.4495 | 0.1543  |
| YDR513W   | GRX2    | YMR152W | YIM1    | 0.4493 | 0.2068  |
| YER049W   | TPA1    | YOL097C | WRS1    | 0.4493 | 0.0442  |
| YMR005W   | TAF4    | YER150W | SPI1    | 0.4493 | 0.0382  |
| YNL321W   | VNX1    | YLL024C | SSA2    | 0.4492 | -0.1644 |
| YGR028W   | MSP1    | YIR026C | YVH1    | 0.4491 | -0.1020 |
| YBR193C   | MED8    | YOR371C | GPB1    | 0.4490 | 0.1376  |
| YMR158W   | MRPS8   | YBR037C | SCO1    | 0.4489 | 0.0483  |
| YER046W   | SPO73   | YJL140W | RPB4    | 0.4488 | 0.0365  |
| YJL058C   | BIT61   | YOL113W | SKM1    | 0.4488 | 0.0311  |
| YLR237W   | THI7    | YHR043C | DOG2    | 0.4486 | -0.1340 |
| YGR001C   | EFM5    | YDL167C | NRP1    | 0.4484 | 0.0673  |
| YBR008C   | FLR1    | YBR225W | YBR225W | 0.4482 | 0.0789  |
| YHR043C   | DOG2    | YLR248W | RCK2    | 0.4482 | 0.0442  |
| YPL147W   | PXA1    | YKL073W | LHS1    | 0.4481 | -0.0788 |
| YJR068W   | RFC2    | YLR287C | YLR287C | 0.4477 | 0.1673  |
| YER023W   | PRO3    | YLR452C | SST2    | 0.4475 | 0.1623  |
| YPR015C   | YPR015C | YHR054C | YHR054C | 0.4470 | 0.0246  |
| YPL183C   | RTT10   | YER049W | TPA1    | 0.4465 | 0.2982  |
| YDL089W   | NUR1    | YDL047W | SIT4    | 0.4462 | 0.0921  |
| YMR209C   | YMR209C | YLR237W | THI7    | 0.4462 | -0.0323 |

|         |         |           |           |        |         |
|---------|---------|-----------|-----------|--------|---------|
| YOR144C | ELG1    | YHR033W   | YHR033W   | 0.4462 | -0.0344 |
| YDL089W | NUR1    | YIL015C-A | YIL015C-A | 0.4461 | 0.0172  |
| YMR067C | UBX4    | YMR005W   | TAF4      | 0.4459 | 0.2027  |
| YLR064W | PER33   | YJL178C   | ATG27     | 0.4458 | 0.0260  |
| YDL132W | CDC53   | YDL097C   | RPN6      | 0.4457 | 0.1267  |
| YLR368W | MDM30   | YBL017C   | PEP1      | 0.4454 | 0.1091  |
| YOR088W | YOR088W | YGL193C   | YGL193C   | 0.4451 | 0.0864  |
| YFL056C | AAD6    | YLR452C   | SST2      | 0.4450 | -0.0926 |
| YAR028W | YAR028W | YJL036W   | SNX4      | 0.4447 | 0.0948  |
| YIL119C | RPI1    | YOR101W   | RAS1      | 0.4446 | -0.0265 |
| YOR080W | DIA2    | YHR016C   | YSC84     | 0.4446 | 0.0347  |
| YGL004C | RPN14   | YBR137W   | YBR137W   | 0.4444 | 0.0911  |
| YGR157W | CHO2    | YEL058W   | PCM1      | 0.4444 | 0.0721  |
| YGR207C | CIR1    | YDL111C   | RRP42     | 0.4443 | -0.1792 |
| YJR097W | JJJ3    | YNR012W   | URK1      | 0.4443 | 0.0220  |
| YDL116W | NUP84   | YBR222C   | PCS60     | 0.4442 | -0.1487 |
| YBR067C | TIP1    | YER020W   | GPA2      | 0.4441 | -0.0414 |
| YBL030C | PET9    | YJL140W   | RPB4      | 0.4440 | -0.0613 |
| YBR077C | SLM4    | YBL007C   | SLA1      | 0.4440 | 0.1248  |
| YGL176C | YGL176C | YNL322C   | KRE1      | 0.4440 | -0.1493 |
| YLR426W | TDA5    | YNL074C   | MLF3      | 0.4439 | 0.0495  |
| YML091C | RPM2    | YAL009W   | SPO7      | 0.4439 | -0.1350 |
| YGL193C | YGL193C | YLR455W   | PDP3      | 0.4433 | 0.1589  |
| YJR056C | YJR056C | YLR176C   | RFX1      | 0.4431 | 0.0601  |
| YNR036C | MRPS12  | YGR157W   | CHO2      | 0.4431 | -0.2271 |
| YER020W | GPA2    | YNR034W   | SOL1      | 0.4430 | 0.2378  |
| YML096W | YML096W | YPL183C   | RTT10     | 0.4428 | 0.0092  |
| YEL068C | YEL068C | YML079W   | YML079W   | 0.4426 | 0.0981  |
| YKL183W | LOT5    | YOR051C   | ETT1      | 0.4426 | 0.2256  |
| YDR383C | NKP1    | YFR037C   | RSC8      | 0.4425 | 0.0949  |
| YFL016C | MDJ1    | YDR441C   | APT2      | 0.4425 | 0.1915  |
| YBR008C | FLR1    | YER046W   | SPO73     | 0.4424 | -0.1586 |
| YML110C | COQ5    | YDR531W   | CAB1      | 0.4422 | -0.0777 |
| YDL111C | RRP42   | YHR023W   | MYO1      | 0.4418 | -0.0652 |
| YNL035C | YNL035C | YHR027C   | RPN1      | 0.4417 | 0.0286  |
| YML016C | PPZ1    | YNL074C   | MLF3      | 0.4416 | 0.1092  |
| YGR258C | RAD2    | YBR061C   | TRM7      | 0.4415 | -0.0806 |
| YIL089W | YIL089W | YGR023W   | MTL1      | 0.4415 | 0.0759  |
| YLR443W | ECM7    | YOL026C   | MIM1      | 0.4415 | 0.2167  |
| YNL135C | FPR1    | YLR059C   | REX2      | 0.4414 | 0.1069  |
| YJR097W | JJJ3    | YGR288W   | MAL13     | 0.4413 | -0.1285 |
| YNR034W | SOL1    | YDL116W   | NUP84     | 0.4413 | -0.0062 |
| YEL068C | YEL068C | YJL030W   | MAD2      | 0.4412 | 0.1110  |
| YFL047W | RGD2    | YGL017W   | ATE1      | 0.4412 | 0.0888  |
| YEL056W | HAT2    | YOL097C   | WRS1      | 0.4410 | 0.1214  |
| YLR287C | YLR287C | YPL183C   | RTT10     | 0.4407 | 0.2435  |
| YGL178W | MPT5    | YPL071C   | YPL071C   | 0.4406 | -0.0043 |

|           |         |         |         |        |         |
|-----------|---------|---------|---------|--------|---------|
| YHR209W   | CRG1    | YGL017W | ATE1    | 0.4406 | -0.1517 |
| YCL039W   | GID7    | YLR442C | SIR3    | 0.4401 | -0.0625 |
| YJL140W   | RPB4    | YPL144W | POC4    | 0.4399 | 0.0853  |
| YGR012W   | MCY1    | YOR196C | LIP5    | 0.4398 | 0.0527  |
| YKL110C   | KTI12   | YDL111C | RRP42   | 0.4398 | 0.2721  |
| YOR043W   | WHI2    | YGL176C | YGL176C | 0.4398 | 0.1182  |
| YGL242C   | YGL242C | YKL092C | BUD2    | 0.4396 | 0.2074  |
| YDR383C   | NKP1    | YMR112C | MED11   | 0.4394 | 0.0625  |
| YEL020W-A | TIM9    | YOR371C | GPB1    | 0.4394 | -0.1339 |
| YGL051W   | MST27   | YFR013W | IOC3    | 0.4393 | -0.1925 |
| YOR043W   | WHI2    | YBR229C | ROT2    | 0.4392 | -0.0766 |
| YPL009C   | RQC2    | YHR023W | MYO1    | 0.4391 | 0.0179  |
| YNL074C   | MLF3    | YJL149W | DAS1    | 0.4387 | 0.1747  |
| YLR096W   | KIN2    | YKR052C | MRS4    | 0.4384 | -0.1088 |
| YMR062C   | ARG7    | YHR029C | YHI9    | 0.4382 | 0.3046  |
| YLR452C   | SST2    | YJL187C | SWE1    | 0.4381 | -0.1351 |
| YBR157C   | ICS2    | YDL155W | CLB3    | 0.4379 | -0.0851 |
| YHL048W   | COS8    | YER046W | SPO73   | 0.4379 | 0.1447  |
| YMR046C   | YMR046C | YIL082W | Unknown | 0.4379 | 0.2705  |
| YEL068C   | YEL068C | YLR452C | SST2    | 0.4376 | 0.0406  |
| YOL088C   | MPD2    | YIR022W | SEC11   | 0.4375 | 0.1677  |
| YBL007C   | SLA1    | YBL079W | NUP170  | 0.4374 | 0.0921  |
| YBR008C   | FLR1    | YBR071W | YBR071W | 0.4374 | 0.0599  |
| YCL024W   | KCC4    | YIL166C | YIL166C | 0.4372 | -0.0649 |
| YJL036W   | SNX4    | YMR215W | GAS3    | 0.4371 | -0.1416 |
| YML110C   | COQ5    | YHR016C | YSC84   | 0.4371 | 0.1234  |
| YEL056W   | HAT2    | YJL187C | SWE1    | 0.4370 | 0.1691  |
| YGR157W   | CHO2    | YER020W | GPA2    | 0.4369 | -0.0066 |
| YJL178C   | ATG27   | YJL126W | NIT2    | 0.4369 | 0.2154  |
| YHR016C   | YSC84   | YLR176C | RFX1    | 0.4368 | 0.4242  |
| YDL150W   | RPC53   | YMR209C | YMR209C | 0.4367 | 0.2399  |
| YJR056C   | YJR056C | YFR013W | IOC3    | 0.4367 | 0.1577  |
| YBR249C   | ARO4    | YJR025C | BNA1    | 0.4366 | 0.1131  |
| YDL132W   | CDC53   | YGL035C | MIG1    | 0.4366 | -0.1265 |
| YER046W   | SPO73   | YBR137W | YBR137W | 0.4366 | 0.0658  |
| YBL017C   | PEP1    | YBL105C | PKC1    | 0.4365 | 0.3278  |
| YGR168C   | YGR168C | YMR005W | TAF4    | 0.4365 | -0.1329 |
| YDL155W   | CLB3    | YDL167C | NRP1    | 0.4364 | 0.0564  |
| YIL133C   | RPL16a  | YBR087W | RFC5    | 0.4363 | 0.2149  |
| YKR085C   | MRPL20  | YLR455W | PDP3    | 0.4363 | 0.1984  |
| YDL133W   | SRF1    | YMR158W | MRPS8   | 0.4362 | -0.0630 |
| YBR193C   | MED8    | YJL051W | IRC8    | 0.4360 | -0.0792 |
| YHR039C   | MSC7    | YGL257C | MNT2    | 0.4359 | 0.0347  |
| YLR375W   | STP3    | YPL031C | PHO85   | 0.4359 | 0.2638  |
| YGR006W   | PRP18   | YJL051W | IRC8    | 0.4358 | -0.0830 |
| YJL187C   | SWE1    | YBR137W | YBR137W | 0.4356 | -0.1583 |
| YGR258C   | RAD2    | YLL040C | VPS13   | 0.4355 | 0.0409  |



|         |         |         |         |        |         |
|---------|---------|---------|---------|--------|---------|
| YBL040C | ERD2    | YFL018C | LPD1    | 0.4354 | -0.1229 |
| YLR452C | SST2    | YEL068C | YEL068C | 0.4353 | 0.2356  |
| YPL058C | PDR12   | YDR420W | HKR1    | 0.4352 | 0.1750  |
| YMR046C | YMR046C | YKL160W | ELF1    | 0.4348 | -0.1533 |
| YJR074W | MOG1    | YIL061C | SNP1    | 0.4346 | -0.0426 |
| YER088C | DOT6    | YGR001C | EFM5    | 0.4345 | -0.1440 |
| YJL126W | NIT2    | YOL081W | IRA2    | 0.4345 | -0.1418 |
| YKL116C | PRR1    | YDR144C | MKC7    | 0.4343 | 0.0651  |
| YNL035C | YNL035C | YJR103W | URA8    | 0.4341 | 0.1627  |
| YPL233W | NSL1    | YGR222W | PET54   | 0.4341 | 0.0364  |
| YPL226W | NEW1    | YDR034C | LYS14   | 0.4340 | -0.2765 |
| YDR530C | APA2    | YGL192W | IME4    | 0.4338 | 0.1388  |
| YNL322C | KRE1    | YPL147W | PXA1    | 0.4337 | -0.1723 |
| YML121W | GTR1    | YOL073C | DSC2    | 0.4334 | 0.0696  |
| YJL036W | SNX4    | YHR027C | RPN1    | 0.4333 | 0.1320  |
| YML098W | TAF13   | YJL149W | DAS1    | 0.4332 | -0.1415 |
| YOR264W | DSE3    | YFL016C | MDJ1    | 0.4332 | -0.1933 |
| YKR080W | MTD1    | YKL096W | CWP1    | 0.4331 | -0.1554 |
| YJL126W | NIT2    | YGR012W | MCY1    | 0.4329 | 0.1244  |
| YOL147C | PEX11   | YER186C | YER186C | 0.4327 | -0.0498 |
| YGR023W | MTL1    | YLR057W | MNL2    | 0.4325 | 0.2028  |
| YBR071W | YBR071W | YDR367W | KEI1    | 0.4321 | -0.1428 |
| YJR103W | URA8    | YOL026C | MIM1    | 0.4320 | 0.2677  |
| YGR028W | MSP1    | YMR112C | MED11   | 0.4318 | 0.1026  |
| YJL204C | RCY1    | YKL116C | PRR1    | 0.4316 | 0.1909  |
| YDL150W | RPC53   | YKR085C | MRPL20  | 0.4315 | 0.0602  |
| YML071C | COG8    | YKL092C | BUD2    | 0.4313 | 0.1599  |
| YDL147W | RPN5    | YDL116W | NUP84   | 0.4311 | 0.0550  |
| YGR208W | SER2    | YNL321W | VNX1    | 0.4310 | -0.2231 |
| YFR042W | KEG1    | YGR023W | MTL1    | 0.4307 | -0.0321 |
| YMR154C | RIM13   | YAL056W | GPB2    | 0.4307 | 0.0849  |
| YLL038C | ENT4    | YNL135C | FPR1    | 0.4305 | -0.0617 |
| YOL130W | ALR1    | YNR034W | SOL1    | 0.4302 | -0.1420 |
| YJL218W | YJL218W | YIL066C | RNR3    | 0.4300 | -0.0360 |
| YBL017C | PEP1    | YBR222C | PCS60   | 0.4299 | 0.0315  |
| YGL025C | PGD1    | YIL112W | HOS4    | 0.4299 | 0.0003  |
| YDR339C | FCF1    | YIL043C | CBR1    | 0.4295 | 0.2615  |
| YKR080W | MTD1    | YDR134C | YDR134C | 0.4294 | -0.0818 |
| YJL208C | NUC1    | YGR150C | CCM1    | 0.4293 | 0.2918  |
| YJL047C | RTT101  | YOL089C | HAL9    | 0.4293 | 0.0119  |
| YBL007C | SLA1    | YBR071W | YBR071W | 0.4289 | 0.1889  |
| YGL178W | MPT5    | YKL067W | YNK1    | 0.4289 | -0.0650 |
| YJL163C | YJL163C | YBR147W | RTC2    | 0.4282 | 0.1821  |
| YIL171W | YIL171W | YHL048W | COS8    | 0.4281 | 0.1547  |
| YMR046C | YMR046C | YIL040W | APQ12   | 0.4280 | -0.2086 |
| YMR152W | YIM1    | YML004C | GLO1    | 0.4278 | 0.2184  |
| YPL233W | NSL1    | YLR057W | MNL2    | 0.4278 | 0.0187  |

|         |         |         |         |        |         |
|---------|---------|---------|---------|--------|---------|
| YLR064W | PER33   | YOR103C | OST2    | 0.4276 | 0.0108  |
| YLR096W | KIN2    | YHR039C | MSC7    | 0.4276 | 0.1349  |
| YCL009C | ILV6    | YNL074C | MLF3    | 0.4275 | 0.0836  |
| YOR196C | LIP5    | YLR443W | ECM7    | 0.4272 | 0.1772  |
| YMR215W | GAS3    | YDR134C | YDR134C | 0.4271 | 0.1927  |
| YNL046W | YNL046W | YOL092W | YPQ1    | 0.4268 | 0.0686  |
| YDR513W | GRX2    | YLL040C | VPS13   | 0.4267 | 0.2413  |
| YMR215W | GAS3    | YBL029W | YBL029W | 0.4267 | -0.2731 |
| YNL034W | YNL034W | YOL104C | NDJ1    | 0.4265 | 0.0021  |
| YNL278W | CAF120  | YOL104C | NDJ1    | 0.4263 | -0.0121 |
| YOR196C | LIP5    | YKL110C | KTI12   | 0.4263 | 0.1247  |
| YPL016W | SWI1    | YGL035C | MIG1    | 0.4263 | 0.0816  |
| YJR088C | EMC2    | YPL237W | SUI3    | 0.4261 | 0.1449  |
| YML036W | CGI121  | YLR452C | SST2    | 0.4261 | -0.1402 |
| YOR043W | WHI2    | YDR383C | NKP1    | 0.4260 | 0.1418  |
| YIR022W | SEC11   | YDL132W | CDC53   | 0.4258 | 0.0336  |
| YOR131C | YOR131C | YIL040W | APQ12   | 0.4256 | 0.0020  |
| YHR027C | RPN1    | YNL322C | KRE1    | 0.4255 | 0.1604  |
| YAL009W | SPO7    | YCR083W | TRX3    | 0.4254 | 0.1241  |
| YBR067C | TIP1    | YEL056W | HAT2    | 0.4253 | -0.1036 |
| YHR115C | DMA1    | YGR258C | RAD2    | 0.4253 | -0.1713 |
| YGR157W | CHO2    | YIL171W | YIL171W | 0.4252 | 0.0169  |
| YBR157C | ICS2    | YER116C | SLX8    | 0.4251 | 0.0583  |
| YLR368W | MDM30   | YJL036W | SNX4    | 0.4250 | -0.1114 |
| YBR071W | YBR071W | YBL007C | SLA1    | 0.4249 | 0.0946  |
| YDL180W | YDL180W | YGL176C | YGL176C | 0.4249 | 0.0915  |
| YJL047C | RTT101  | YOR127W | RGA1    | 0.4248 | 0.1520  |
| YLR057W | MNL2    | YLR176C | RFX1    | 0.4248 | -0.1867 |
| YML098W | TAF13   | YML038C | YMD8    | 0.4248 | 0.0934  |
| YOL147C | PEX11   | YNL329C | PEX6    | 0.4246 | 0.1623  |
| YOR117W | RPT5    | YDR351W | SBE2    | 0.4246 | 0.1308  |
| YGL169W | SUA5    | YGL192W | IME4    | 0.4243 | 0.0002  |
| YLR180W | SAM1    | YJR036C | HUL4    | 0.4240 | -0.1985 |
| YMR062C | ARG7    | YJR073C | OPI3    | 0.4240 | -0.2233 |
| YLR375W | STP3    | YOL097C | WRS1    | 0.4237 | -0.1479 |
| YOR117W | RPT5    | YFL018C | LPD1    | 0.4237 | 0.1554  |
| YDR319C | YFT2    | YHR034C | PIH1    | 0.4235 | 0.0125  |
| YOR088W | YOR088W | YKL116C | PRR1    | 0.4234 | -0.0662 |
| YNL034W | YNL034W | YBL020W | RFT1    | 0.4233 | 0.0801  |
| YBR008C | FLR1    | YDR481C | PHO8    | 0.4232 | 0.2132  |
| YDR481C | PHO8    | YDR441C | APT2    | 0.4231 | 0.1664  |
| YJR036C | HUL4    | YER116C | SLX8    | 0.4231 | 0.0974  |
| YLR375W | STP3    | YGR150C | CCM1    | 0.4230 | -0.2548 |
| YNL074C | MLF3    | YMR046C | YMR046C | 0.4230 | 0.1661  |
| YOL018C | TLG2    | YLR206W | ENT2    | 0.4229 | 0.0773  |
| YNL041C | COG6    | YFR013W | IOC3    | 0.4228 | 0.2912  |
| YDR178W | SDH4    | YGR208W | SER2    | 0.4227 | -0.1842 |

|           |           |         |         |        |         |
|-----------|-----------|---------|---------|--------|---------|
| YOR092W   | ECM3      | YIL066C | RNR3    | 0.4225 | 0.0966  |
| YER116C   | SLX8      | YHR050W | SMF2    | 0.4224 | -0.0386 |
| YBL020W   | RFT1      | YBR037C | SCO1    | 0.4223 | 0.1185  |
| YKL184W   | SPE1      | YGL051W | MST27   | 0.4222 | 0.2986  |
| YER182W   | FMP10     | YOR048C | RAT1    | 0.4220 | -0.0896 |
| YHR027C   | RPN1      | YMR062C | ARG7    | 0.4220 | -0.0331 |
| YER023W   | PRO3      | YKL073W | LHS1    | 0.4219 | 0.0738  |
| YKL116C   | PRR1      | YDL047W | SIT4    | 0.4219 | 0.0706  |
| YHR115C   | DMA1      | YDR420W | HKR1    | 0.4218 | 0.1710  |
| YKL184W   | SPE1      | YNL322C | KRE1    | 0.4218 | 0.1317  |
| YHR029C   | YHI9      | YDR481C | PHO8    | 0.4217 | 0.3588  |
| YLR435W   | TSR2      | YLR287C | YLR287C | 0.4216 | 0.0507  |
| YBR121C   | GRS1      | YIL040W | APQ12   | 0.4215 | -0.1683 |
| YGR207C   | CIR1      | YOR103C | OST2    | 0.4215 | -0.1185 |
| YIL089W   | YIL089W   | YGL207W | SPT16   | 0.4215 | -0.0317 |
| YKL116C   | PRR1      | YJL204C | RCY1    | 0.4215 | 0.0265  |
| YGL004C   | RPN14     | YHR209W | CRG1    | 0.4214 | 0.0223  |
| YMR062C   | ARG7      | YDR531W | CAB1    | 0.4213 | 0.0506  |
| YML048W   | GSF2      | YMR123W | PKR1    | 0.4212 | 0.0973  |
| YMR154C   | RIM13     | YPL071C | YPL071C | 0.4212 | 0.0564  |
| YER186C   | YER186C   | YKL073W | LHS1    | 0.4211 | -0.1520 |
| YDL116W   | NUP84     | YDL103C | QRI1    | 0.4206 | 0.0843  |
| YPL031C   | PHO85     | YGL025C | PGD1    | 0.4206 | 0.0223  |
| YOL018C   | TLG2      | YBL020W | RFT1    | 0.4202 | -0.0998 |
| YBR147W   | RTC2      | YGL169W | SUA5    | 0.4199 | -0.2015 |
| YHR050W   | SMF2      | YMR215W | GAS3    | 0.4198 | 0.1657  |
| YFL047W   | RGD2      | YNR034W | SOL1    | 0.4196 | -0.0628 |
| YBL089W   | AVT5      | YJL118W | YJL118W | 0.4195 | -0.0810 |
| YLR096W   | KIN2      | YPL012W | RRP12   | 0.4194 | 0.0766  |
| YHR027C   | RPN1      | YIL142W | CCT2    | 0.4192 | 0.1441  |
| YDL164C   | CDC9      | YML013W | UBX2    | 0.4191 | 0.1334  |
| YMR115W   | MGR3      | YML036W | CGI121  | 0.4191 | 0.0778  |
| YGL242C   | YGL242C   | YNL138W | SRV2    | 0.4189 | 0.0641  |
| YJR074W   | MOG1      | YAL009W | SPO7    | 0.4189 | 0.0407  |
| YHR023W   | MYO1      | YDR441C | APT2    | 0.4188 | -0.1609 |
| YIL015C-A | YIL015C-A | YOL104C | NDJ1    | 0.4184 | 0.0381  |
| YLR047C   | FRE8      | YOL113W | SKM1    | 0.4184 | 0.1311  |
| YPL234C   | VMA11     | YPL016W | SWI1    | 0.4184 | -0.0889 |
| YJL047C   | RTT101    | YOR101W | RAS1    | 0.4182 | -0.1959 |
| YER020W   | GPA2      | YOR054C | VHS3    | 0.4181 | 0.0559  |
| YNL326C   | PFA3      | YML013W | UBX2    | 0.4180 | -0.0939 |
| YLR046C   | YLR046C   | YLR052W | IES3    | 0.4177 | -0.1318 |
| YGR157W   | CHO2      | YKL073W | LHS1    | 0.4173 | 0.0566  |
| YMR046C   | YMR046C   | YJL051W | IRC8    | 0.4173 | -0.0467 |
| YJL171C   | TOH1      | YEL068C | YEL068C | 0.4170 | -0.1166 |
| YDL133W   | SRF1      | YER186C | YER186C | 0.4168 | 0.1415  |
| YPR022C   | SDD4      | YBR067C | TIP1    | 0.4168 | -0.0691 |

|           |           |         |         |        |         |
|-----------|-----------|---------|---------|--------|---------|
| YNL135C   | FPR1      | YOL043C | NTG2    | 0.4165 | -0.0027 |
| YML013W   | UBX2      | YGR012W | MCY1    | 0.4164 | 0.1957  |
| YGR258C   | RAD2      | YIL043C | CBR1    | 0.4160 | -0.0275 |
| YJL036W   | SNX4      | YKR051W | YKR051W | 0.4158 | 0.0050  |
| YNL326C   | PFA3      | YOR051C | ETT1    | 0.4158 | 0.1334  |
| YCL018W   | LEU2      | YJL212C | OPT1    | 0.4157 | -0.0281 |
| YPR196W   | YPR196W   | YLR047C | FRE8    | 0.4157 | 0.0954  |
| YBL089W   | AVT5      | YDL103C | QRI1    | 0.4155 | -0.0591 |
| YML038C   | YMD8      | YKL116C | PRR1    | 0.4154 | -0.1437 |
| YIL066C   | RNR3      | YDR420W | HKR1    | 0.4150 | 0.2467  |
| YKL116C   | PRR1      | YER144C | UBP5    | 0.4150 | 0.1257  |
| YAL009W   | SPO7      | YOL147C | PEX11   | 0.4149 | 0.0571  |
| YCR031C   | RPS14a    | YLR342W | FKS1    | 0.4148 | 0.1995  |
| YNL322C   | KRE1      | YGL176C | YGL176C | 0.4148 | -0.0114 |
| YNL321W   | VNX1      | YBR229C | ROT2    | 0.4148 | 0.0354  |
| YOL026C   | MIM1      | YOR043W | WHI2    | 0.4144 | -0.0329 |
| YCL024W   | KCC4      | YNL041C | COG6    | 0.4143 | -0.1630 |
| YGR207C   | CIR1      | YOR092W | ECM3    | 0.4143 | -0.1030 |
| YIL015C-A | YIL015C-A | YGL193C | YGL193C | 0.4142 | -0.0568 |
| YDL164C   | CDC9      | YLR258W | GSY2    | 0.4141 | -0.1796 |
| YPR196W   | YPR196W   | YFL047W | RGD2    | 0.4141 | 0.0787  |
| YML079W   | YML079W   | YML036W | CGI121  | 0.4140 | 0.2794  |
| YBR168W   | PEX32     | YOR088W | YOR088W | 0.4139 | 0.1119  |
| YJR074W   | MOG1      | YML098W | TAF13   | 0.4139 | 0.0326  |
| YLR047C   | FRE8      | YNL329C | PEX6    | 0.4139 | -0.0707 |
| YGL195W   | GCN1      | YOR080W | DIA2    | 0.4137 | 0.1915  |
| YGL176C   | YGL176C   | YOR144C | ELG1    | 0.4137 | 0.1432  |
| YML038C   | YMD8      | YDL002C | NHP10   | 0.4137 | -0.1294 |
| YOL164W   | BDS1      | YJL171C | TOH1    | 0.4133 | 0.0927  |
| YLL061W   | MMP1      | YHR050W | SMF2    | 0.4130 | 0.1732  |
| YGR006W   | PRP18     | YDR420W | HKR1    | 0.4128 | -0.0757 |
| YPR015C   | YPR015C   | YJR088C | EMC2    | 0.4128 | 0.0215  |
| YBR193C   | MED8      | YLR426W | TDA5    | 0.4127 | 0.0887  |
| YOR196C   | LIP5      | YIL089W | YIL089W | 0.4125 | -0.1922 |
| YAL056W   | GPB2      | YJL163C | YJL163C | 0.4124 | 0.1816  |
| YER020W   | GPA2      | YFR037C | RSC8    | 0.4124 | 0.2073  |
| YMR152W   | YIM1      | YOR048C | RAT1    | 0.4123 | -0.1348 |
| YBR222C   | PCS60     | YER186C | YER186C | 0.4120 | -0.0305 |
| YJL030W   | MAD2      | YBL040C | ERD2    | 0.4120 | 0.1030  |
| YJR084W   | YJR084W   | YMR062C | ARG7    | 0.4119 | -0.0771 |
| YBR161W   | CSH1      | YBR229C | ROT2    | 0.4118 | 0.0293  |
| YKL184W   | SPE1      | YGR222W | PET54   | 0.4117 | -0.2445 |
| YOR048C   | RAT1      | YML079W | YML079W | 0.4116 | -0.1686 |
| YIR022W   | SEC11     | YOL088C | MPD2    | 0.4115 | 0.1548  |
| YNL200C   | NNR1      | YLR248W | RCK2    | 0.4115 | 0.2585  |
| YLR206W   | ENT2      | YIL119C | RPI1    | 0.4113 | 0.0556  |
| YOR088W   | YOR088W   | YJR036C | HUL4    | 0.4112 | 0.0498  |

|           |         |           |         |        |         |
|-----------|---------|-----------|---------|--------|---------|
| YEL021W   | URA3    | YBR069C   | TAT1    | 0.4111 | 0.1476  |
| YJL154C   | VPS35   | YJR086W   | STE18   | 0.4110 | -0.0073 |
| YGL025C   | PGD1    | YHR115C   | DMA1    | 0.4109 | 0.0002  |
| YBR087W   | RFC5    | YDR339C   | FCF1    | 0.4108 | 0.1135  |
| YLL024C   | SSA2    | YPL226W   | NEW1    | 0.4108 | 0.0884  |
| YLR455W   | PDP3    | YCR031C   | RPS14a  | 0.4105 | 0.0181  |
| YJL208C   | NUC1    | YKL110C   | KTI12   | 0.4104 | 0.0666  |
| YGL226C-A | OST5    | YNR034W   | SOL1    | 0.4103 | -0.2410 |
| YHR063C   | PAN5    | YOR196C   | LIP5    | 0.4102 | 0.0354  |
| YKL021C   | MAK11   | YHL007C   | STE20   | 0.4102 | 0.4280  |
| YLR096W   | KIN2    | YLR430W   | SEN1    | 0.4102 | 0.1920  |
| YDL217C   | TIM22   | YFR004W   | RPN11   | 0.4101 | -0.1116 |
| YDR497C   | ITR1    | YKR080W   | MTD1    | 0.4100 | -0.0435 |
| YLR452C   | SST2    | YOL113W   | SKM1    | 0.4100 | -0.0630 |
| YNL322C   | KRE1    | YDR383C   | NKP1    | 0.4098 | 0.0879  |
| YNL242W   | ATG2    | YBR161W   | CSH1    | 0.4096 | -0.0407 |
| YOR144C   | ELG1    | YCL024W   | KCC4    | 0.4091 | 0.2751  |
| YIL112W   | HOS4    | YDR034C   | LYS14   | 0.4089 | 0.0001  |
| YJR025C   | BNA1    | YJR032W   | CPR7    | 0.4087 | -0.1471 |
| YBR077C   | SLM4    | YBR154C   | RPB5    | 0.4086 | 0.1508  |
| YOR196C   | LIP5    | YJR074W   | MOG1    | 0.4084 | 0.1781  |
| YFR047C   | BNA6    | YGR211W   | ZPR1    | 0.4083 | -0.0435 |
| YGR184C   | UBR1    | YNL074C   | MLF3    | 0.4083 | -0.0785 |
| YHR209W   | CRG1    | YDR134C   | YDR134C | 0.4081 | -0.0871 |
| YNL242W   | ATG2    | YNL329C   | PEX6    | 0.4081 | 0.1261  |
| YOR131C   | YOR131C | YEL076W-C | Unknown | 0.4081 | -0.1559 |
| YDL132W   | CDC53   | YPL064C   | CWC27   | 0.4079 | -0.1027 |
| YIL009W   | FAA3    | YDL211C   | YDL211C | 0.4079 | 0.1286  |
| YHR063C   | PAN5    | YLR443W   | ECM7    | 0.4078 | 0.2086  |
| YPL233W   | NSL1    | YLR237W   | THI7    | 0.4077 | -0.1132 |
| YLR248W   | RCK2    | YMR112C   | MED11   | 0.4075 | -0.2308 |
| YBR163W   | EXO5    | YPL058C   | PDR12   | 0.4072 | -0.1454 |
| YNL215W   | IES2    | YLR442C   | SIR3    | 0.4072 | 0.0602  |
| YOR144C   | ELG1    | YLR257W   | YLR257W | 0.4071 | -0.1492 |
| YOR043W   | WHI2    | YLR375W   | STP3    | 0.4069 | 0.0243  |
| YLR442C   | SIR3    | YOL130W   | ALR1    | 0.4068 | 0.0456  |
| YJL126W   | NIT2    | YJR032W   | CPR7    | 0.4067 | 0.2729  |
| YBR067C   | TIP1    | YBR071W   | YBR071W | 0.4065 | -0.1127 |
| YLR248W   | RCK2    | YNL200C   | NNR1    | 0.4065 | 0.1189  |
| YGR208W   | SER2    | YPL237W   | SUI3    | 0.4064 | 0.0498  |
| YJL187C   | SWE1    | YJL051W   | IRC8    | 0.4064 | 0.0608  |
| YBR249C   | ARO4    | YGR288W   | MAL13   | 0.4062 | 0.0906  |
| YGL004C   | RPN14   | YIL089W   | YIL089W | 0.4062 | 0.1186  |
| YER116C   | SLX8    | YOR051C   | ETT1    | 0.4061 | 0.1379  |
| YHR034C   | PIH1    | YLR057W   | MNL2    | 0.4061 | -0.1497 |
| YHR023W   | MYO1    | YMR123W   | PKR1    | 0.4059 | -0.1293 |
| YIL166C   | YIL166C | YPL144W   | POC4    | 0.4058 | -0.1183 |

|         |         |           |         |        |         |
|---------|---------|-----------|---------|--------|---------|
| YJL030W | MAD2    | YPL016W   | SWI1    | 0.4058 | -0.0552 |
| YBR168W | PEX32   | YLL024C   | SSA2    | 0.4057 | 0.1662  |
| YLR452C | SST2    | YLR435W   | TSR2    | 0.4055 | 0.1250  |
| YMR046C | YMR046C | YAR028W   | YAR028W | 0.4050 | 0.1301  |
| YBR166C | TYR1    | YER144C   | UBP5    | 0.4049 | 0.2481  |
| YDR420W | HKR1    | YLR172C   | DPH5    | 0.4047 | -0.0427 |
| YHR034C | PIH1    | YNL280C   | ERG24   | 0.4047 | 0.0032  |
| YJL030W | MAD2    | YLR052W   | IES3    | 0.4047 | 0.1961  |
| YOR043W | WHI2    | YNL124W   | NAF1    | 0.4047 | 0.0683  |
| YCL018W | LEU2    | YNL074C   | MLF3    | 0.4046 | 0.1936  |
| YGR211W | ZPR1    | YBR132C   | AGP2    | 0.4046 | -0.0521 |
| YLR059C | REX2    | YGR207C   | CIR1    | 0.4044 | -0.1174 |
| YAL056W | GPB2    | YOR033C   | EXO1    | 0.4041 | -0.0717 |
| YHL048W | COS8    | YEL076W-C | Unknown | 0.4041 | 0.0645  |
| YMR005W | TAF4    | YLR389C   | STE23   | 0.4041 | -0.0151 |
| YDR351W | SBE2    | YIL112W   | HOS4    | 0.4039 | 0.1711  |
| YLR435W | TSR2    | YGR158C   | MTR3    | 0.4037 | 0.2195  |
| YJR032W | CPR7    | YHL007C   | STE20   | 0.4036 | 0.0260  |
| YOL104C | NDJ1    | YLR237W   | THI7    | 0.4034 | -0.1187 |
| YOR371C | GPB1    | YDR134C   | YDR134C | 0.4034 | -0.1504 |
| YIL043C | CBR1    | YLR206W   | ENT2    | 0.4033 | -0.1530 |
| YJL187C | SWE1    | YDL155W   | CLB3    | 0.4032 | 0.1068  |
| YJL178C | ATG27   | YPL234C   | VMA11   | 0.4032 | 0.0810  |
| YLR368W | MDM30   | YOL130W   | ALR1    | 0.4030 | 0.0019  |
| YER023W | PRO3    | YLR442C   | SIR3    | 0.4029 | -0.2117 |
| YLR172C | DPH5    | YGR208W   | SER2    | 0.4029 | 0.0900  |
| YDR134C | YDR134C | YBL079W   | NUP170  | 0.4027 | -0.0622 |
| YGL242C | YGL242C | YDL147W   | RPN5    | 0.4024 | 0.0642  |
| YOR101W | RAS1    | YNL074C   | MLF3    | 0.4023 | -0.2061 |
| YKL073W | LHS1    | YLR257W   | YLR257W | 0.4021 | 0.0768  |
| YPL064C | CWC27   | YIL061C   | SNP1    | 0.4021 | -0.0653 |
| YHR054C | YHR054C | YGR222W   | PET54   | 0.4020 | -0.0987 |
| YIL046W | MET30   | YOR196C   | LIP5    | 0.4020 | 0.0985  |
| YCL024W | KCC4    | YOL104C   | NDJ1    | 0.4019 | -0.1277 |
| YMR112C | MED11   | YGR168C   | YGR168C | 0.4019 | 0.0778  |
| YHR023W | MYO1    | YOR054C   | VHS3    | 0.4017 | 0.0748  |
| YJR036C | HUL4    | YLR368W   | MDM30   | 0.4017 | 0.0834  |
| YEL064C | AVT2    | YOL147C   | PEX11   | 0.4016 | 0.1768  |
| YNL242W | ATG2    | YLR330W   | CHS5    | 0.4015 | -0.0023 |
| YPL237W | SUI3    | YGR208W   | SER2    | 0.4013 | 0.3697  |
| YCL024W | KCC4    | YBL040C   | ERD2    | 0.4012 | -0.0946 |
| YDR481C | PHO8    | YBR008C   | FLR1    | 0.4012 | 0.2890  |
| YGR157W | CHO2    | YHR029C   | YHI9    | 0.4012 | -0.1239 |
| YOR088W | YOR088W | YJL047C   | RTT101  | 0.4012 | -0.0346 |
| YKL184W | SPE1    | YER023W   | PRO3    | 0.4011 | 0.0356  |
| YDL132W | CDC53   | YDL164C   | CDC9    | 0.4010 | 0.0987  |
| YBR163W | EXO5    | YFL016C   | MDJ1    | 0.4009 | -0.0193 |

|         |         |           |         |        |         |
|---------|---------|-----------|---------|--------|---------|
| YLR287C | YLR287C | YHR115C   | DMA1    | 0.4008 | -0.0055 |
| YOL062C | APM4    | YGR157W   | CHO2    | 0.4006 | 0.0899  |
| YGL257C | MNT2    | YGR157W   | CHO2    | 0.4005 | 0.0671  |
| YGL035C | MIG1    | YLR047C   | FRE8    | 0.4005 | -0.0517 |
| YCR041W | YCR041W | YOL026C   | MIM1    | 0.4004 | -0.0952 |
| YDL180W | YDL180W | YIL040W   | APQ12   | 0.4004 | 0.0466  |
| YDL133W | SRF1    | YDR531W   | CAB1    | 0.4003 | 0.1044  |
| YGR152C | RSR1    | YCL024W   | KCC4    | 0.4003 | 0.0190  |
| YDL089W | NUR1    | YBR274W   | CHK1    | 0.4002 | 0.0352  |
| YLR180W | SAM1    | YFR037C   | RSC8    | 0.4002 | 0.0949  |
| YIL171W | YIL171W | YLR096W   | KIN2    | 0.4001 | -0.0766 |
| YOL094C | RFC4    | YJR068W   | RFC2    | 0.4001 | 0.0212  |
| YGL017W | ATE1    | YOR131C   | YOR131C | 0.4000 | 0.1668  |
| YOL094C | RFC4    | YGR149W   | GPC1    | 0.4000 | -0.2534 |
| YGL169W | SUA5    | YHL048W   | COS8    | 0.3999 | -0.0672 |
| YGL176C | YGL176C | YGR006W   | PRP18   | 0.3998 | 0.0293  |
| YBL040C | ERD2    | YDL150W   | RPC53   | 0.3996 | -0.1393 |
| YGR012W | MCY1    | YFR004W   | RPN11   | 0.3995 | 0.2194  |
| YKR051W | YKR051W | YOR048C   | RAT1    | 0.3994 | -0.0587 |
| YDR383C | NKP1    | YDR058C   | TGL2    | 0.3993 | 0.0607  |
| YFL018C | LPD1    | YDL116W   | NUP84   | 0.3993 | 0.0428  |
| YIL061C | SNP1    | YEL064C   | AVT2    | 0.3993 | 0.1318  |
| YJL149W | DAS1    | YEL020W-A | TIM9    | 0.3991 | -0.0550 |
| YOR080W | DIA2    | YPL031C   | PHO85   | 0.3991 | -0.0405 |
| YJL158C | CIS3    | YDR319C   | YFT2    | 0.3989 | 0.0524  |
| YMR215W | GAS3    | YPL009C   | RQC2    | 0.3988 | 0.2858  |
| YER037W | PHM8    | YER035W   | EDC2    | 0.3986 | 0.1130  |
| YLR052W | IES3    | YJL036W   | SNX4    | 0.3986 | -0.0407 |
| YOR131C | YOR131C | YGR184C   | UBR1    | 0.3986 | -0.0888 |
| YLR452C | SST2    | YER020W   | GPA2    | 0.3984 | -0.1311 |
| YNL326C | PFA3    | YOL093W   | TRM10   | 0.3983 | 0.0634  |
| YKL092C | BUD2    | YPL009C   | RQC2    | 0.3982 | 0.0335  |
| YGL035C | MIG1    | YML013W   | UBX2    | 0.3980 | -0.0921 |
| YBR168W | PEX32   | YLR248W   | RCK2    | 0.3979 | 0.0957  |
| YDR420W | HKR1    | YIL066C   | RNR3    | 0.3979 | 0.0442  |
| YLR449W | FPR4    | YEL055C   | POL5    | 0.3978 | 0.1166  |
| YLR455W | PDP3    | YLR206W   | ENT2    | 0.3978 | 0.1324  |
| YBR061C | TRM7    | YGL257C   | MNT2    | 0.3976 | -0.1136 |
| YHR023W | MYO1    | YOR142W   | LSC1    | 0.3975 | 0.2339  |
| YJL154C | VPS35   | YGR150C   | CCM1    | 0.3975 | 0.0882  |
| YGR168C | YGR168C | YHR115C   | DMA1    | 0.3974 | -0.1460 |
| YER049W | TPA1    | YIR026C   | YVH1    | 0.3973 | 0.0841  |
| YJL171C | TOH1    | YDR481C   | PHO8    | 0.3973 | 0.0645  |
| YEL064C | AVT2    | YNL135C   | FPR1    | 0.3971 | -0.0668 |
| YBR071W | YBR071W | YKL096W   | CWP1    | 0.3970 | -0.1129 |
| YFR047C | BNA6    | YML007W   | YAP1    | 0.3970 | -0.1515 |
| YKR075C | YKR075C | YHR043C   | DOG2    | 0.3969 | -0.1460 |

|         |         |         |         |        |         |
|---------|---------|---------|---------|--------|---------|
| YLR176C | RFX1    | YBR087W | RFC5    | 0.3969 | -0.1070 |
| YOL093W | TRM10   | YJR008W | MHO1    | 0.3969 | -0.1496 |
| YPR080W | TEF1    | YOR131C | YOR131C | 0.3969 | -0.0683 |
| YOL113W | SKM1    | YDL147W | RPN5    | 0.3968 | 0.0062  |
| YGL226W | MTC3    | YMR158W | MRPS8   | 0.3967 | 0.1465  |
| YLR096W | KIN2    | YLR442C | SIR3    | 0.3967 | 0.1829  |
| YGL195W | GCN1    | YPL009C | RQC2    | 0.3965 | 0.0904  |
| YGL169W | SUA5    | YDR528W | HLR1    | 0.3965 | 0.1390  |
| YDR034C | LYS14   | YDR531W | CAB1    | 0.3963 | 0.1579  |
| YPL001W | HAT1    | YCR083W | TRX3    | 0.3963 | -0.0790 |
| YGL051W | MST27   | YJL030W | MAD2    | 0.3959 | 0.0009  |
| YLR443W | ECM7    | YLL024C | SSA2    | 0.3958 | 0.0233  |
| YDR319C | YFT2    | YDL103C | QRI1    | 0.3956 | 0.0849  |
| YKL116C | PRR1    | YBR147W | RTC2    | 0.3956 | -0.1004 |
| YLR430W | SEN1    | YOR371C | GPB1    | 0.3956 | 0.0228  |
| YML016C | PPZ1    | YLL024C | SSA2    | 0.3956 | -0.1455 |
| YNL321W | VNX1    | YJL163C | YJL163C | 0.3956 | 0.0679  |
| YJR097W | JJJ3    | YPL012W | RRP12   | 0.3952 | 0.1030  |
| YOR054C | VHS3    | YNL322C | KRE1    | 0.3952 | -0.1189 |
| YDL150W | RPC53   | YLR248W | RCK2    | 0.3951 | 0.0602  |
| YFL016C | MDJ1    | YCL024W | KCC4    | 0.3950 | 0.1614  |
| YJL036W | SNX4    | YJL158C | CIS3    | 0.3950 | -0.1097 |
| YNL135C | FPR1    | YNR034W | SOL1    | 0.3949 | 0.1561  |
| YIL066C | RNR3    | YAR028W | YAR028W | 0.3946 | 0.1045  |
| YOR251C | TUM1    | YMR158W | MRPS8   | 0.3946 | -0.0294 |
| YBR163W | EXO5    | YBR154C | RPB5    | 0.3945 | 0.0444  |
| YEL064C | AVT2    | YOR092W | ECM3    | 0.3944 | 0.0555  |
| YGL201C | MCM6    | YJL118W | YJL118W | 0.3944 | 0.0946  |
| YGL178W | MPT5    | YIL082W | Unknown | 0.3943 | 0.0901  |
| YKL184W | SPE1    | YBR067C | TIP1    | 0.3941 | 0.0978  |
| YBR274W | CHK1    | YBL030C | PET9    | 0.3938 | 0.0460  |
| YOR101W | RAS1    | YOR371C | GPB1    | 0.3938 | -0.1846 |
| YDR420W | HKR1    | YGR023W | MTL1    | 0.3937 | 0.0864  |
| YBL105C | PKC1    | YNL280C | ERG24   | 0.3935 | -0.0518 |
| YJL118W | YJL118W | YBL089W | AVT5    | 0.3935 | -0.0383 |
| YJL058C | BIT61   | YOL147C | PEX11   | 0.3932 | 0.0428  |
| YOL164W | BDS1    | YGR258C | RAD2    | 0.3932 | 0.0014  |
| YDR515W | SLF1    | YOR371C | GPB1    | 0.3931 | -0.0961 |
| YBR239C | ERT1    | YBR147W | RTC2    | 0.3930 | 0.0771  |
| YJL047C | RTT101  | YOR051C | ETT1    | 0.3930 | 0.0206  |
| YKR085C | MRPL20  | YGR028W | MSP1    | 0.3930 | 0.0206  |
| YNL024C | EFM6    | YBR157C | ICS2    | 0.3930 | 0.0884  |
| YBR229C | ROT2    | YIL089W | YIL089W | 0.3929 | 0.1134  |
| YDL147W | RPN5    | YGR157W | CHO2    | 0.3929 | 0.1528  |
| YLR452C | SST2    | YPL058C | PDR12   | 0.3929 | 0.0584  |
| YJL030W | MAD2    | YJR068W | RFC2    | 0.3927 | 0.0704  |
| YBR161W | CSH1    | YBL017C | PEP1    | 0.3926 | 0.0537  |



|           |         |         |         |        |         |
|-----------|---------|---------|---------|--------|---------|
| YMR067C   | UBX4    | YDL150W | RPC53   | 0.3925 | 0.2431  |
| YGR258C   | RAD2    | YHL048W | COS8    | 0.3922 | 0.0643  |
| YDL111C   | RRP42   | YGR207C | CIR1    | 0.3921 | -0.0985 |
| YMR112C   | MED11   | YLR248W | RCK2    | 0.3920 | -0.0283 |
| YNL215W   | IES2    | YDR515W | SLF1    | 0.3920 | 0.0260  |
| YDL133W   | SRF1    | YML038C | YMD8    | 0.3919 | 0.0299  |
| YJL051W   | IRC8    | YDL103C | QRI1    | 0.3919 | -0.0312 |
| YLR237W   | THI7    | YOR131C | YOR131C | 0.3918 | -0.0741 |
| YML072C   | TCB3    | YBR069C | TAT1    | 0.3917 | 0.1442  |
| YJR088C   | EMC2    | YJL140W | RPB4    | 0.3916 | 0.0925  |
| YCL026C-A | FRM2    | YIL112W | HOS4    | 0.3915 | 0.1309  |
| YJR088C   | EMC2    | YGL025C | PGD1    | 0.3915 | -0.2303 |
| YLR064W   | PER33   | YBL079W | NUP170  | 0.3913 | -0.0315 |
| YHR115C   | DMA1    | YML038C | YMD8    | 0.3911 | 0.1185  |
| YJL154C   | VPS35   | YOL092W | YPQ1    | 0.3911 | -0.0924 |
| YBR166C   | TYR1    | YLR052W | IES3    | 0.3910 | -0.0716 |
| YML110C   | COQ5    | YML079W | YML079W | 0.3910 | 0.0590  |
| YOR389W   | YOR389W | YNR034W | SOL1    | 0.3909 | -0.0351 |
| YLR096W   | KIN2    | YLR057W | MNL2    | 0.3908 | 0.0420  |
| YLL024C   | SSA2    | YHR054C | YHR054C | 0.3906 | 0.1193  |
| YJL208C   | NUC1    | YPL183C | RTT10   | 0.3905 | 0.2686  |
| YJL163C   | YJL163C | YJR008W | MHO1    | 0.3905 | 0.0036  |
| YNL041C   | COG6    | YLR389C | STE23   | 0.3905 | 0.1084  |
| YEL071W   | DLD3    | YOR101W | RAS1    | 0.3902 | -0.1074 |
| YDL132W   | CDC53   | YDL147W | RPN5    | 0.3901 | 0.0552  |
| YHR027C   | RPN1    | YDR034C | LYS14   | 0.3901 | -0.0683 |
| YCR041W   | YCR041W | YHR043C | DOG2    | 0.3900 | 0.0285  |
| YBR071W   | YBR071W | YBR067C | TIP1    | 0.3899 | -0.0977 |
| YKR085C   | MRPL20  | YEL068C | YEL068C | 0.3899 | 0.2646  |
| YJL204C   | RCY1    | YJL030W | MAD2    | 0.3897 | 0.0305  |
| YKL160W   | ELF1    | YDR351W | SBE2    | 0.3897 | -0.0582 |
| YLR206W   | ENT2    | YHR115C | DMA1    | 0.3896 | 0.0009  |
| YLR056W   | ERG3    | YML091C | RPM2    | 0.3895 | -0.1313 |
| YMR215W   | GAS3    | YJL036W | SNX4    | 0.3894 | -0.3734 |
| YER022W   | SRB4    | YBR239C | ERT1    | 0.3893 | -0.1309 |
| YLR330W   | CHS5    | YFR004W | RPN11   | 0.3893 | 0.1557  |
| YIR022W   | SEC11   | YKR075C | YKR075C | 0.3892 | -0.0749 |
| YOR048C   | RAT1    | YIR026C | YVH1    | 0.3892 | 0.0228  |
| YMR010W   | ANY1    | YML013W | UBX2    | 0.3891 | 0.0638  |
| YKL183W   | LOT5    | YKR051W | YKR051W | 0.3890 | -0.0835 |
| YEL068C   | YEL068C | YOL147C | PEX11   | 0.3887 | -0.1315 |
| YER088C   | DOT6    | YNL124W | NAF1    | 0.3886 | 0.0940  |
| YBL029W   | YBL029W | YER185W | PUG1    | 0.3885 | 0.0389  |
| YNR036C   | MRPS12  | YKL184W | SPE1    | 0.3885 | -0.1800 |
| YIL142W   | CCT2    | YIR026C | YVH1    | 0.3883 | 0.1319  |
| YOL147C   | PEX11   | YEL056W | HAT2    | 0.3882 | -0.0125 |
| YER026C   | CHO1    | YNL124W | NAF1    | 0.3879 | -0.1339 |

|           |         |           |         |        |         |
|-----------|---------|-----------|---------|--------|---------|
| YDL002C   | NHP10   | YIL158W   | AIM20   | 0.3878 | 0.0518  |
| YML096W   | YML096W | YOR054C   | VHS3    | 0.3877 | -0.0899 |
| YOR088W   | YOR088W | YFR047C   | BNA6    | 0.3875 | 0.1406  |
| YJL140W   | RPB4    | YOR127W   | RGA1    | 0.3874 | -0.0048 |
| YHR016C   | YSC84   | YLL040C   | VPS13   | 0.3870 | 0.4130  |
| YIL089W   | YIL089W | YEL076W-C | Unknown | 0.3868 | 0.1001  |
| YPL233W   | NSL1    | YOL081W   | IRA2    | 0.3867 | -0.0266 |
| YOL062C   | APM4    | YPL234C   | VMA11   | 0.3866 | -0.0682 |
| YER116C   | SLX8    | YLR059C   | REX2    | 0.3864 | 0.1209  |
| YNL041C   | COG6    | YJL118W   | YJL118W | 0.3863 | -0.0282 |
| YGL004C   | RPN14   | YHR043C   | DOG2    | 0.3861 | 0.1025  |
| YBR037C   | SCO1    | YLR449W   | FPR4    | 0.3860 | -0.0962 |
| YCR071C   | IMG2    | YFR011C   | MIC19   | 0.3858 | 0.1356  |
| YGR168C   | YGR168C | YMR112C   | MED11   | 0.3854 | 0.0354  |
| YKL116C   | PRR1    | YMR010W   | ANY1    | 0.3854 | 0.0469  |
| YER019W   | ISC1    | YLR426W   | TDA5    | 0.3852 | 0.1576  |
| YER037W   | PHM8    | YHR209W   | CRG1    | 0.3851 | 0.0696  |
| YEL020W-A | TIM9    | YKL067W   | YNK1    | 0.3850 | 0.1754  |
| YLR231C   | BNA5    | YOL113W   | SKM1    | 0.3848 | -0.0332 |
| YMR005W   | TAF4    | YGL193C   | YGL193C | 0.3847 | -0.1104 |
| YER022W   | SRB4    | YCR083W   | TRX3    | 0.3846 | -0.0610 |
| YML004C   | GLO1    | YPL147W   | PXA1    | 0.3846 | -0.0607 |
| YAR028W   | YAR028W | YJL047C   | RTT101  | 0.3845 | -0.0171 |
| YFL018C   | LPD1    | YDL103C   | QRI1    | 0.3841 | 0.0329  |
| YER019W   | ISC1    | YML036W   | CGI121  | 0.3839 | 0.0285  |
| YJR088C   | EMC2    | YBR137W   | YBR137W | 0.3839 | 0.2279  |
| YMR115W   | MGR3    | YNL322C   | KRE1    | 0.3836 | -0.0637 |
| YDR383C   | NKP1    | YNL329C   | PEX6    | 0.3834 | -0.1390 |
| YLL040C   | VPS13   | YGR023W   | MTL1    | 0.3832 | 0.1165  |
| YOL026C   | MIM1    | YBR067C   | TIP1    | 0.3832 | 0.0104  |
| YPL234C   | VMA11   | YOR127W   | RGA1    | 0.3831 | -0.2021 |
| YML048W   | GSF2    | YML004C   | GLO1    | 0.3830 | 0.0225  |
| YBR166C   | TYR1    | YEL058W   | PCM1    | 0.3828 | 0.1487  |
| YFR004W   | RPN11   | YOL130W   | ALR1    | 0.3828 | -0.1101 |
| YOL073C   | DSC2    | YNL322C   | KRE1    | 0.3828 | 0.0983  |
| YDL132W   | CDC53   | YML013W   | UBX2    | 0.3827 | 0.0029  |
| YKL096W   | CWP1    | YGL176C   | YGL176C | 0.3826 | 0.1847  |
| YBR132C   | AGP2    | YCR031C   | RPS14a  | 0.3823 | -0.0788 |
| YBR163W   | EXO5    | YLR237W   | THI7    | 0.3823 | -0.3576 |
| YGL193C   | YGL193C | YGL017W   | ATE1    | 0.3822 | -0.0866 |
| YGR012W   | MCY1    | YMR115W   | MGR3    | 0.3822 | 0.1925  |
| YJL036W   | SNX4    | YNL035C   | YNL035C | 0.3822 | 0.0199  |
| YPL144W   | POC4    | YDR420W   | HKR1    | 0.3820 | -0.0355 |
| YDR497C   | ITR1    | YNL024C   | EFM6    | 0.3819 | 0.1775  |
| YIL089W   | YIL089W | YOR196C   | LIP5    | 0.3819 | -0.1672 |
| YPL012W   | RRP12   | YJL208C   | NUC1    | 0.3817 | 0.3334  |
| YBR071W   | YBR071W | YOL062C   | APM4    | 0.3816 | 0.0325  |

|         |         |         |         |        |         |
|---------|---------|---------|---------|--------|---------|
| YDR513W | GRX2    | YOL153C | YOL153C | 0.3815 | 0.1816  |
| YPL183C | RTT10   | YPL226W | NEW1    | 0.3813 | 0.1689  |
| YDL133W | SRF1    | YDL147W | RPN5    | 0.3811 | 0.0428  |
| YKL073W | LHS1    | YGR157W | CHO2    | 0.3811 | 0.1343  |
| YFR042W | KEG1    | YLL024C | SSA2    | 0.3810 | 0.1439  |
| YLR052W | IES3    | YKL092C | BUD2    | 0.3808 | 0.0361  |
| YLR237W | THI7    | YDL111C | RRP42   | 0.3808 | -0.1060 |
| YMR112C | MED11   | YLR426W | TDA5    | 0.3806 | 0.0299  |
| YGR150C | CCM1    | YBL017C | PEP1    | 0.3805 | 0.0768  |
| YHR039C | MSC7    | YBR163W | EXO5    | 0.3804 | -0.0920 |
| YDL171C | GLT1    | YML036W | CGI121  | 0.3803 | -0.1932 |
| YLR443W | ECM7    | YLR206W | ENT2    | 0.3803 | 0.1067  |
| YFL056C | AAD6    | YOL062C | APM4    | 0.3802 | 0.0599  |
| YJR068W | RFC2    | YGL178W | MPT5    | 0.3799 | -0.1337 |
| YLR181C | VTA1    | YJL030W | MAD2    | 0.3799 | 0.0828  |
| YGL178W | MPT5    | YDL150W | RPC53   | 0.3798 | 0.0340  |
| YPL226W | NEW1    | YPL183C | RTT10   | 0.3798 | 0.0643  |
| YIL040W | APQ12   | YDL097C | RPN6    | 0.3793 | 0.0708  |
| YKL073W | LHS1    | YBR154C | RPB5    | 0.3791 | -0.1371 |
| YOL018C | TLG2    | YOL113W | SKM1    | 0.3790 | 0.2030  |
| YML004C | GLO1    | YML048W | GSF2    | 0.3787 | 0.1559  |
| YMR154C | RIM13   | YOL097C | WRS1    | 0.3787 | -0.0792 |
| YML079W | YML079W | YER035W | EDC2    | 0.3786 | 0.0682  |
| YDL135C | RDI1    | YOL147C | PEX11   | 0.3785 | 0.1341  |
| YOL026C | MIM1    | YNL135C | FPR1    | 0.3785 | 0.1444  |
| YDL227C | Ho      | YMR046C | YMR046C | 0.3784 | -0.0013 |
| YPL016W | SWI1    | YKL067W | YNK1    | 0.3784 | -0.1189 |
| YPR080W | TEF1    | YDL217C | TIM22   | 0.3782 | 0.1005  |
| YBL029W | YBL029W | YBL089W | AVT5    | 0.3781 | 0.1223  |
| YKL019W | RAM2    | YPL071C | YPL071C | 0.3780 | -0.0395 |
| YNL326C | PFA3    | YNL022C | RCM1    | 0.3778 | 0.0905  |
| YJL126W | NIT2    | YJL047C | RTT101  | 0.3776 | 0.1705  |
| YJL051W | IRC8    | YGR006W | PRP18   | 0.3776 | -0.0110 |
| YER026C | CHO1    | YBR166C | TYR1    | 0.3775 | -0.1908 |
| YJL047C | RTT101  | YJL183W | MNN11   | 0.3774 | -0.0449 |
| YPL031C | PHO85   | YLR375W | STP3    | 0.3774 | 0.1908  |
| YDR383C | NKP1    | YDL047W | SIT4    | 0.3773 | 0.1049  |
| YLR430W | SEN1    | YDR524C | AGE1    | 0.3773 | -0.0064 |
| YNL034W | YNL034W | YPL031C | PHO85   | 0.3773 | -0.0184 |
| YCL009C | ILV6    | YOL081W | IRA2    | 0.3771 | 0.1444  |
| YOR127W | RGA1    | YFL047W | RGD2    | 0.3771 | 0.0854  |
| YGR289C | MAL11   | YML098W | TAF13   | 0.3770 | -0.0608 |
| YIL165C | YIL165C | YGR001C | EFM5    | 0.3770 | 0.1909  |
| YJL217W | REE1    | YML007W | YAP1    | 0.3770 | 0.0582  |
| YNL022C | RCM1    | YPL012W | RRP12   | 0.3770 | 0.0414  |
| YBL014C | RRN6    | YBR229C | ROT2    | 0.3767 | 0.0894  |
| YFR011C | MIC19   | YFL018C | LPD1    | 0.3767 | 0.0582  |

|           |         |           |         |        |         |
|-----------|---------|-----------|---------|--------|---------|
| YHR104W   | GRE3    | YDR513W   | GRX2    | 0.3765 | 0.2003  |
| YLR449W   | FPR4    | YGR158C   | MTR3    | 0.3765 | 0.1958  |
| YML004C   | GLO1    | YMR152W   | YIM1    | 0.3765 | 0.0484  |
| YBR239C   | ERT1    | YBL007C   | SLA1    | 0.3764 | 0.0971  |
| YER022W   | SRB4    | YBR274W   | CHK1    | 0.3764 | -0.0143 |
| YLR435W   | TSR2    | YKL110C   | KTI12   | 0.3764 | 0.1477  |
| YPL237W   | SUI3    | YEL055C   | POL5    | 0.3764 | 0.1662  |
| YBR071W   | YBR071W | YDR319C   | YFT2    | 0.3762 | 0.1915  |
| YGR149W   | GPC1    | YJR073C   | OPI3    | 0.3759 | 0.1485  |
| YJL140W   | RPB4    | YOR088W   | YOR088W | 0.3757 | 0.0912  |
| YLR206W   | ENT2    | YOL062C   | APM4    | 0.3757 | 0.1123  |
| YBR222C   | PCS60   | YBL079W   | NUP170  | 0.3756 | 0.0547  |
| YKL073W   | LHS1    | YJR032W   | CPR7    | 0.3752 | 0.1220  |
| YJR025C   | BNA1    | YMR062C   | ARG7    | 0.3751 | 0.0467  |
| YFL049W   | SWP82   | YIL112W   | HOS4    | 0.3750 | -0.0329 |
| YDL111C   | RRP42   | YKL110C   | KTI12   | 0.3749 | 0.0994  |
| YGL192W   | IME4    | YFL016C   | MDJ1    | 0.3749 | 0.1090  |
| YOL094C   | RFC4    | YMR123W   | PKR1    | 0.3749 | 0.1590  |
| YBR137W   | YBR137W | YJL187C   | SWE1    | 0.3747 | -0.1492 |
| YDR144C   | MKC7    | YLR375W   | STP3    | 0.3744 | -0.0935 |
| YHR034C   | PIH1    | YER046W   | SPO73   | 0.3744 | 0.0337  |
| YJR073C   | OPI3    | YPL234C   | VMA11   | 0.3744 | 0.0010  |
| YKL160W   | ELF1    | YDR420W   | HKR1    | 0.3744 | -0.1207 |
| YBR193C   | MED8    | YPL058C   | PDR12   | 0.3743 | -0.0648 |
| YIL040W   | APQ12   | YER116C   | SLX8    | 0.3742 | -0.1122 |
| YJL212C   | OPT1    | YLL061W   | MMP1    | 0.3741 | 0.0648  |
| YJL154C   | VPS35   | YER037W   | PHM8    | 0.3739 | 0.1063  |
| YMR112C   | MED11   | YPL144W   | POC4    | 0.3739 | 0.1701  |
| YOL018C   | TLG2    | YNL041C   | COG6    | 0.3739 | 0.0157  |
| YER046W   | SPO73   | YIL119C   | RPI1    | 0.3738 | -0.0248 |
| YMR154C   | RIM13   | YML013W   | UBX2    | 0.3738 | 0.1164  |
| YLR047C   | FRE8    | YML079W   | YML079W | 0.3736 | -0.0709 |
| YJR040W   | GEF1    | YDR420W   | HKR1    | 0.3735 | 0.0729  |
| YFL016C   | MDJ1    | YLR330W   | CHS5    | 0.3734 | 0.1452  |
| YNR012W   | URK1    | YJR097W   | JJJ3    | 0.3734 | 0.2188  |
| YOL147C   | PEX11   | YEL076W-C | Unknown | 0.3734 | 0.0858  |
| YPL016W   | SWI1    | YIL043C   | CBR1    | 0.3733 | -0.0787 |
| YER144C   | UBP5    | YMR209C   | YMR209C | 0.3731 | -0.1215 |
| YBR154C   | RPB5    | YBL020W   | RFT1    | 0.3730 | 0.2170  |
| YLR231C   | BNA5    | YLR443W   | ECM7    | 0.3730 | -0.1153 |
| YFL056C   | AAD6    | YKL184W   | SPE1    | 0.3729 | 0.0864  |
| YGL053W   | PRM8    | YJL047C   | RTT101  | 0.3729 | 0.0684  |
| YKL019W   | RAM2    | YLR046C   | YLR046C | 0.3729 | 0.0722  |
| YOR054C   | VHS3    | YDR351W   | SBE2    | 0.3728 | 0.1104  |
| YER185W   | PUG1    | YLR368W   | MDM30   | 0.3727 | 0.0679  |
| YCL026C-A | FRM2    | YFL018C   | LPD1    | 0.3726 | -0.1989 |
| YER019W   | ISC1    | YOR051C   | ETT1    | 0.3726 | -0.0439 |

|           |         |           |         |        |         |
|-----------|---------|-----------|---------|--------|---------|
| YLR047C   | FRE8    | YER020W   | GPA2    | 0.3726 | 0.0741  |
| YBR193C   | MED8    | YDR530C   | APA2    | 0.3725 | 0.0701  |
| YER022W   | SRB4    | YOL018C   | TLG2    | 0.3725 | 0.1568  |
| YDL047W   | SIT4    | YBR161W   | CSH1    | 0.3724 | 0.1676  |
| YHL007C   | STE20   | YEL076W-C | Unknown | 0.3724 | 0.3705  |
| YOR196C   | LIP5    | YOR101W   | RAS1    | 0.3724 | -0.1573 |
| YER022W   | SRB4    | YJL140W   | RPB4    | 0.3721 | 0.0122  |
| YBR163W   | EXO5    | YBR061C   | TRM7    | 0.3718 | 0.0736  |
| YFR013W   | IOC3    | YGR006W   | PRP18   | 0.3718 | 0.0940  |
| YBR222C   | PCS60   | YBR196C   | PGI1    | 0.3717 | 0.2413  |
| YJR068W   | RFC2    | YML007W   | YAP1    | 0.3717 | -0.2048 |
| YML110C   | COQ5    | YER144C   | UBP5    | 0.3717 | -0.1895 |
| YLR287C   | YLR287C | YLL035W   | GRC3    | 0.3715 | 0.3155  |
| YBR168W   | PEX32   | YEL064C   | AVT2    | 0.3714 | 0.0900  |
| YMR158W   | MRPS8   | YDL133W   | SRF1    | 0.3714 | -0.2231 |
| YDL147W   | RPN5    | YNR036C   | MRPS12  | 0.3713 | -0.0876 |
| YDL135C   | RDI1    | YJR040W   | GEF1    | 0.3711 | -0.0131 |
| YLR096W   | KIN2    | YIL171W   | YIL171W | 0.3711 | -0.0003 |
| YJL187C   | SWE1    | YLR342W   | FKS1    | 0.3710 | 0.1286  |
| YLR231C   | BNA5    | YLR442C   | SIR3    | 0.3710 | -0.0862 |
| YML004C   | GLO1    | YIL119C   | RPI1    | 0.3710 | -0.1333 |
| YPL234C   | VMA11   | YKL183W   | LOT5    | 0.3710 | 0.1257  |
| YLR180W   | SAM1    | YDR144C   | MKC7    | 0.3709 | 0.0577  |
| YML096W   | YML096W | YKL125W   | RRN3    | 0.3709 | 0.1334  |
| YEL020W-A | TIM9    | YGR222W   | PET54   | 0.3708 | 0.1653  |
| YFL016C   | MDJ1    | YLR452C   | SST2    | 0.3707 | -0.1404 |
| YFR047C   | BNA6    | YBR168W   | PEX32   | 0.3707 | 0.2120  |
| YIL112W   | HOS4    | YIL165C   | YIL165C | 0.3707 | 0.0064  |
| YJL058C   | BIT61   | YOR051C   | ETT1    | 0.3706 | 0.0605  |
| YDL147W   | RPN5    | YPL009C   | RQC2    | 0.3705 | 0.1489  |
| YIL112W   | HOS4    | YNL200C   | NNR1    | 0.3705 | 0.0746  |
| YLR464W   | YLR464W | YBR168W   | PEX32   | 0.3705 | -0.0582 |
| YGL051W   | MST27   | YML007W   | YAP1    | 0.3703 | 0.0789  |
| YDR441C   | APT2    | YML036W   | CGI121  | 0.3700 | 0.0758  |
| YML079W   | YML079W | YOR033C   | EXO1    | 0.3700 | -0.1623 |
| YJR008W   | MHO1    | YPL012W   | RRP12   | 0.3699 | -0.2376 |
| YIL043C   | CBR1    | YGR258C   | RAD2    | 0.3697 | -0.2023 |
| YCR071C   | IMG2    | YIL112W   | HOS4    | 0.3695 | -0.1332 |
| YGR289C   | MAL11   | YLR258W   | GSY2    | 0.3692 | 0.0073  |
| YDL002C   | NHP10   | YDR531W   | CAB1    | 0.3691 | 0.0908  |
| YFL047W   | RGD2    | YBL040C   | ERD2    | 0.3691 | -0.0966 |
| YGL035C   | MIG1    | YJL149W   | DAS1    | 0.3690 | 0.0481  |
| YJL154C   | VPS35   | YPL001W   | HAT1    | 0.3690 | -0.0701 |
| YOR092W   | ECM3    | YEL058W   | PCM1    | 0.3690 | -0.0776 |
| YOR101W   | RAS1    | YNL280C   | ERG24   | 0.3689 | 0.1170  |
| YIL166C   | YIL166C | YLL061W   | MMP1    | 0.3687 | -0.0013 |
| YGL004C   | RPN14   | YDL155W   | CLB3    | 0.3686 | 0.0259  |

|         |         |           |           |        |         |
|---------|---------|-----------|-----------|--------|---------|
| YGR152C | RSR1    | YBR071W   | YBR071W   | 0.3686 | 0.0276  |
| YJL178C | ATG27   | YFL047W   | RGD2      | 0.3686 | -0.2243 |
| YLR057W | MNL2    | YOL088C   | MPD2      | 0.3685 | 0.1002  |
| YMR112C | MED11   | YAR027W   | UIP3      | 0.3684 | -0.0673 |
| YAL056W | GPB2    | YGL207W   | SPT16     | 0.3682 | -0.0976 |
| YML048W | GSF2    | YMR067C   | UBX4      | 0.3682 | 0.0016  |
| YOL097C | WRS1    | YOL094C   | RFC4      | 0.3679 | 0.2807  |
| YOR043W | WHI2    | YIL015C-A | YIL015C-A | 0.3679 | -0.1626 |
| YGL257C | MNT2    | YBR061C   | TRM7      | 0.3678 | -0.0026 |
| YJL178C | ATG27   | YDR319C   | YFT2      | 0.3675 | -0.2044 |
| YJL047C | RTT101  | YNL041C   | COG6      | 0.3675 | 0.0553  |
| YJL118W | YJL118W | YBL014C   | RRN6      | 0.3674 | 0.0364  |
| YNR034W | SOL1    | YBR249C   | ARO4      | 0.3673 | 0.0422  |
| YOL104C | NDJ1    | YPL058C   | PDR12     | 0.3671 | 0.0708  |
| YCL024W | KCC4    | YJL187C   | SWE1      | 0.3670 | 0.1789  |
| YPR022C | SDD4    | YJL149W   | DAS1      | 0.3670 | 0.0711  |
| YFR013W | IOC3    | YJR103W   | URA8      | 0.3669 | -0.1064 |
| YJL118W | YJL118W | YGR288W   | MAL13     | 0.3669 | -0.0389 |
| YML007W | YAP1    | YDR515W   | SLF1      | 0.3669 | 0.0689  |
| YOR127W | RGA1    | YPL234C   | VMA11     | 0.3669 | -0.0207 |
| YOR051C | ETT1    | YBL079W   | NUP170    | 0.3668 | -0.1310 |
| YJL178C | ATG27   | YPL016W   | SWI1      | 0.3667 | -0.1755 |
| YKL073W | LHS1    | YOL088C   | MPD2      | 0.3667 | 0.1132  |
| YML007W | YAP1    | YJR073C   | OPI3      | 0.3667 | -0.0324 |
| YDR319C | YFT2    | YDL217C   | TIM22     | 0.3666 | 0.1197  |
| YJL154C | VPS35   | YOR371C   | GPB1      | 0.3664 | 0.1254  |
| YAR027W | UIP3    | YGR006W   | PRP18     | 0.3663 | -0.0055 |
| YGL208W | SIP2    | YGL207W   | SPT16     | 0.3658 | -0.1717 |
| YMR112C | MED11   | YGL208W   | SIP2      | 0.3658 | -0.0870 |
| YBL020W | RFT1    | YBR154C   | RPB5      | 0.3657 | 0.1279  |
| YJL178C | ATG27   | YPL237W   | SUI3      | 0.3655 | 0.0433  |
| YJR056C | YJR056C | YEL076W-C | Unknown   | 0.3655 | -0.1577 |
| YML110C | COQ5    | YJR008W   | MHO1      | 0.3654 | 0.1303  |
| YFL049W | SWP82   | YOR101W   | RAS1      | 0.3653 | -0.0748 |
| YGL257C | MNT2    | YOL081W   | IRA2      | 0.3652 | -0.0042 |
| YNL326C | PFA3    | YDR134C   | YDR134C   | 0.3652 | 0.0609  |
| YML091C | RPM2    | YLR237W   | THI7      | 0.3650 | -0.1951 |
| YJL204C | RCY1    | YLR368W   | MDM30     | 0.3649 | -0.2339 |
| YKL019W | RAM2    | YJL204C   | RCY1      | 0.3644 | 0.0947  |
| YGL242C | YGL242C | YGL207W   | SPT16     | 0.3643 | 0.0476  |
| YLL028W | TPO1    | YJL183W   | MNN11     | 0.3643 | 0.0745  |
| YOR251C | TUM1    | YNL024C   | EFM6      | 0.3643 | 0.1073  |
| YBL105C | PKC1    | YJR097W   | JJJ3      | 0.3642 | -0.0029 |
| YIL046W | MET30   | YOL113W   | SKM1      | 0.3642 | 0.1179  |
| YOR054C | VHS3    | YJL047C   | RTT101    | 0.3642 | 0.1258  |
| YBR157C | ICS2    | YLL061W   | MMP1      | 0.3641 | -0.0680 |
| YLR426W | TDA5    | YHR023W   | MYO1      | 0.3639 | -0.0650 |

|           |           |         |         |        |         |
|-----------|-----------|---------|---------|--------|---------|
| YER037W   | PHM8      | YJL171C | TOH1    | 0.3638 | 0.1256  |
| YBR137W   | YBR137W   | YLR046C | YLR046C | 0.3636 | -0.2237 |
| YCR041W   | YCR041W   | YLR057W | MNL2    | 0.3635 | 0.0334  |
| YDR134C   | YDR134C   | YOR196C | LIP5    | 0.3635 | -0.0697 |
| YEL056W   | HAT2      | YJL051W | IRC8    | 0.3634 | 0.1960  |
| YBR166C   | TYR1      | YGL226W | MTC3    | 0.3630 | -0.0078 |
| YGR288W   | MAL13     | YDL164C | CDC9    | 0.3630 | -0.1381 |
| YPL016W   | SWI1      | YJR086W | STE18   | 0.3630 | -0.1385 |
| YFL018C   | LPD1      | YOR196C | LIP5    | 0.3629 | 0.0130  |
| YOL089C   | HAL9      | YKL096W | CWP1    | 0.3629 | -0.0750 |
| YIR022W   | SEC11     | YBR249C | ARO4    | 0.3628 | -0.0735 |
| YGR157W   | CHO2      | YML098W | TAF13   | 0.3626 | -0.0864 |
| YJL118W   | YJL118W   | YLR389C | STE23   | 0.3626 | -0.0658 |
| YCL039W   | GID7      | YJR086W | STE18   | 0.3625 | 0.0348  |
| YDR144C   | MKC7      | YKL116C | PRR1    | 0.3625 | 0.0186  |
| YMR215W   | GAS3      | YJL183W | MNN11   | 0.3620 | 0.1378  |
| YGR006W   | PRP18     | YJR103W | URA8    | 0.3619 | 0.0039  |
| YBR037C   | SCO1      | YEL058W | PCM1    | 0.3617 | -0.2293 |
| YIL089W   | YIL089W   | YBR274W | CHK1    | 0.3617 | 0.0219  |
| YER144C   | UBP5      | YBR229C | ROT2    | 0.3616 | -0.0556 |
| YER150W   | SPI1      | YFR047C | BNA6    | 0.3616 | 0.1764  |
| YNR012W   | URK1      | YPL012W | RRP12   | 0.3616 | 0.0618  |
| YMR005W   | TAF4      | YJR074W | MOG1    | 0.3611 | 0.0647  |
| YOL092W   | YPQ1      | YML098W | TAF13   | 0.3610 | 0.1329  |
| YCR083W   | TRX3      | YOL147C | PEX11   | 0.3609 | 0.0915  |
| YIR028W   | DAL4      | YGR288W | MAL13   | 0.3609 | -0.0645 |
| YBL014C   | RRN6      | YBL007C | SLA1    | 0.3607 | 0.1233  |
| YJL178C   | ATG27     | YML098W | TAF13   | 0.3605 | 0.0672  |
| YPL147W   | PXA1      | YPL001W | HAT1    | 0.3604 | -0.1508 |
| YIL043C   | CBR1      | YHL048W | COS8    | 0.3603 | -0.1611 |
| YOL088C   | MPD2      | YJL118W | YJL118W | 0.3603 | -0.1476 |
| YMR215W   | GAS3      | YML110C | COQ5    | 0.3601 | 0.2512  |
| YER037W   | PHM8      | YEL071W | DLD3    | 0.3597 | -0.1658 |
| YBR274W   | CHK1      | YMR152W | YIM1    | 0.3596 | -0.0933 |
| YFL047W   | RGD2      | YDR180W | SCC2    | 0.3594 | -0.1536 |
| YPL016W   | SWI1      | YBL040C | ERD2    | 0.3594 | -0.1129 |
| YOR144C   | ELG1      | YOL088C | MPD2    | 0.3593 | -0.2444 |
| YGR288W   | MAL13     | YML036W | CGI121  | 0.3592 | -0.1521 |
| YFR004W   | RPN11     | YOL018C | TLG2    | 0.3591 | 0.0109  |
| YGR150C   | CCM1      | YPL147W | PXA1    | 0.3591 | 0.0470  |
| YHR115C   | DMA1      | YGR222W | PET54   | 0.3591 | -0.0171 |
| YGR012W   | MCY1      | YDR058C | TGL2    | 0.3590 | 0.0002  |
| YBL030C   | PET9      | YLR442C | SIR3    | 0.3589 | -0.0446 |
| YKL096W   | CWP1      | YBL105C | PKC1    | 0.3588 | -0.0394 |
| YBL014C   | RRN6      | YJL118W | YJL118W | 0.3584 | 0.1039  |
| YIL015C-A | YIL015C-A | YKL092C | BUD2    | 0.3584 | -0.0860 |
| YOL093W   | TRM10     | YKL021C | MAK11   | 0.3584 | 0.1427  |

|         |         |         |         |        |         |
|---------|---------|---------|---------|--------|---------|
| YHR027C | RPN1    | YGR288W | MAL13   | 0.3583 | -0.1002 |
| YBL020W | RFT1    | YLR176C | RFX1    | 0.3581 | -0.0639 |
| YMR046C | YMR046C | YLR442C | SIR3    | 0.3581 | -0.0282 |
| YGL201C | MCM6    | YKL110C | KTI12   | 0.3580 | 0.0284  |
| YGR012W | MCY1    | YOL113W | SKM1    | 0.3579 | 0.1438  |
| YKL092C | BUD2    | YHR023W | MYO1    | 0.3578 | 0.0799  |
| YDL132W | CDC53   | YJL212C | OPT1    | 0.3577 | -0.0835 |
| YNL215W | IES2    | YJL178C | ATG27   | 0.3577 | 0.0755  |
| YDR064W | RPS13   | YNL135C | FPR1    | 0.3574 | 0.0909  |
| YGR157W | CHO2    | YGL257C | MNT2    | 0.3574 | 0.1112  |
| YGL004C | RPN14   | YMR115W | MGR3    | 0.3572 | -0.1538 |
| YJL187C | SWE1    | YGR152C | RSR1    | 0.3572 | 0.1865  |
| YKL067W | YNK1    | YCR083W | TRX3    | 0.3569 | 0.0069  |
| YBR168W | PEX32   | YKL092C | BUD2    | 0.3567 | 0.0780  |
| YDR528W | HLR1    | YNL321W | VNX1    | 0.3563 | -0.1675 |
| YHR023W | MYO1    | YLL040C | VPS13   | 0.3563 | 0.0087  |
| YMR209C | YMR209C | YJL171C | TOH1    | 0.3562 | -0.0923 |
| YAL056W | GPB2    | YBL040C | ERD2    | 0.3561 | -0.0970 |
| YGR184C | UBR1    | YLL040C | VPS13   | 0.3561 | 0.0263  |
| YKL092C | BUD2    | YER046W | SPO73   | 0.3561 | 0.0317  |
| YNL074C | MLF3    | YBR168W | PEX32   | 0.3561 | -0.0776 |
| YDR420W | HKR1    | YOL026C | MIM1    | 0.3560 | -0.0253 |
| YGR194C | XKS1    | YGR222W | PET54   | 0.3558 | 0.3154  |
| YOL147C | PEX11   | YLR046C | YLR046C | 0.3558 | 0.2366  |
| YNL215W | IES2    | YPL064C | CWC27   | 0.3554 | 0.0308  |
| YOR389W | YOR389W | YFR037C | RSC8    | 0.3552 | -0.0249 |
| YML038C | YMD8    | YOL092W | YPQ1    | 0.3551 | 0.0598  |
| YGR289C | MAL11   | YGL051W | MST27   | 0.3549 | 0.0813  |
| YBL030C | PET9    | YNL321W | VNX1    | 0.3548 | 0.0000  |
| YMR123W | PKR1    | YGR001C | EFM5    | 0.3548 | 0.0013  |
| YGR288W | MAL13   | YBR087W | RFC5    | 0.3547 | -0.0779 |
| YIL165C | YIL165C | YJR025C | BNA1    | 0.3546 | 0.0740  |
| YDL047W | SIT4    | YOR142W | LSC1    | 0.3545 | -0.0547 |
| YGL193C | YGL193C | YCL024W | KCC4    | 0.3544 | 0.0429  |
| YLR064W | PER33   | YML079W | YML079W | 0.3542 | 0.0340  |
| YGR184C | UBR1    | YLR052W | IES3    | 0.3541 | -0.0887 |
| YCL009C | ILV6    | YBR222C | PCS60   | 0.3540 | 0.0930  |
| YHR039C | MSC7    | YLR096W | KIN2    | 0.3540 | 0.1348  |
| YML036W | CGI121  | YMR209C | YMR209C | 0.3540 | 0.2056  |
| YOL113W | SKM1    | YLR426W | TDA5    | 0.3539 | 0.1590  |
| YBR067C | TIP1    | YEL068C | YEL068C | 0.3536 | 0.0772  |
| YGR150C | CCM1    | YOL018C | TLG2    | 0.3535 | 0.0294  |
| YDR497C | ITR1    | YLR057W | MNL2    | 0.3534 | -0.0396 |
| YER144C | UBP5    | YML110C | COQ5    | 0.3534 | -0.0734 |
| YDL103C | QRI1    | YGR288W | MAL13   | 0.3531 | -0.0593 |
| YJR086W | STE18   | YLL024C | SSA2    | 0.3531 | 0.1308  |
| YHR054C | YHR054C | YEL064C | AVT2    | 0.3530 | 0.0714  |



|           |           |         |         |        |         |
|-----------|-----------|---------|---------|--------|---------|
| YAL051W   | OAF1      | YOL092W | YPQ1    | 0.3526 | -0.0390 |
| YFR013W   | IOC3      | YCL009C | ILV6    | 0.3526 | -0.0218 |
| YDL089W   | NUR1      | YEL068C | YEL068C | 0.3525 | 0.0633  |
| YKL096W   | CWP1      | YHR063C | PAN5    | 0.3524 | -0.1304 |
| YER019W   | ISC1      | YLR248W | RCK2    | 0.3523 | -0.0870 |
| YCR031C   | RPS14a    | YJL183W | MNN11   | 0.3522 | 0.1427  |
| YEL058W   | PCM1      | YPL058C | PDR12   | 0.3522 | 0.0699  |
| YGR194C   | XKS1      | YNL035C | YNL035C | 0.3522 | -0.2750 |
| YBR274W   | CHK1      | YMR005W | TAF4    | 0.3521 | 0.0545  |
| YFR042W   | KEG1      | YOR103C | OST2    | 0.3520 | 0.0041  |
| YGR207C   | CIR1      | YKL092C | BUD2    | 0.3520 | 0.2168  |
| YNL138W   | SRV2      | YGL242C | YGL242C | 0.3520 | 0.1425  |
| YIL165C   | YIL165C   | YIL112W | HOS4    | 0.3516 | 0.1058  |
| YJL047C   | RTT101    | YLR237W | THI7    | 0.3516 | -0.1885 |
| YIL015C-A | YIL015C-A | YIL061C | SNP1    | 0.3515 | -0.0275 |
| YPL009C   | RQC2      | YBR225W | YBR225W | 0.3515 | -0.1192 |
| YJL158C   | CIS3      | YPL226W | NEW1    | 0.3514 | 0.0617  |
| YIL066C   | RNR3      | YML004C | GLO1    | 0.3512 | 0.0624  |
| YLR452C   | SST2      | YFL016C | MDJ1    | 0.3512 | -0.1163 |
| YPL016W   | SWI1      | YML036W | CGI121  | 0.3512 | -0.0088 |
| YFR042W   | KEG1      | YMR115W | MGR3    | 0.3511 | -0.1292 |
| YPL071C   | YPL071C   | YGR006W | PRP18   | 0.3511 | 0.0424  |
| YJL058C   | BIT61     | YLL035W | GRC3    | 0.3510 | 0.0171  |
| YML007W   | YAP1      | YKL067W | YNK1    | 0.3510 | -0.1224 |
| YMR005W   | TAF4      | YHR063C | PAN5    | 0.3510 | -0.1498 |
| YDR420W   | HKR1      | YBL030C | PET9    | 0.3508 | 0.1547  |
| YIL009W   | FAA3      | YNL034W | YNL034W | 0.3507 | -0.0611 |
| YJL051W   | IRC8      | YJL187C | SWE1    | 0.3506 | 0.0322  |
| YML038C   | YMD8      | YDR497C | ITR1    | 0.3502 | 0.0587  |
| YDR178W   | SDH4      | YHR050W | SMF2    | 0.3501 | 0.2689  |
| YDR383C   | NKP1      | YNL322C | KRE1    | 0.3501 | 0.0358  |
| YNL074C   | MLF3      | YGR208W | SER2    | 0.3500 | 0.1615  |
| YJR040W   | GEF1      | YLR206W | ENT2    | 0.3498 | 0.0048  |
| YGR208W   | SER2      | YGR209C | TRX2    | 0.3493 | 0.1047  |
| YPR015C   | YPR015C   | YOL018C | TLG2    | 0.3493 | -0.0636 |
| YJR084W   | YJR084W   | YBR274W | CHK1    | 0.3492 | 0.0549  |
| YMR209C   | YMR209C   | YHR023W | MYO1    | 0.3492 | -0.0789 |
| YDL171C   | GLT1      | YIL009W | FAA3    | 0.3490 | 0.0727  |
| YBR137W   | YBR137W   | YER046W | SPO73   | 0.3487 | 0.0539  |
| YIL166C   | YIL166C   | YNL041C | COG6    | 0.3486 | 0.0033  |
| YJL208C   | NUC1      | YML004C | GLO1    | 0.3486 | -0.1667 |
| YER186C   | YER186C   | YGR001C | EFM5    | 0.3483 | 0.0359  |
| YDR180W   | SCC2      | YKL021C | MAK11   | 0.3482 | 0.2316  |
| YHL048W   | COS8      | YFR013W | IOC3    | 0.3482 | 0.1618  |
| YEL071W   | DLD3      | YNL280C | ERG24   | 0.3481 | -0.1821 |
| YER037W   | PHM8      | YBR147W | RTC2    | 0.3481 | 0.0845  |
| YLR172C   | DPH5      | YMR123W | PKR1    | 0.3481 | 0.1443  |

|           |         |         |         |        |         |
|-----------|---------|---------|---------|--------|---------|
| YBR126C   | TPS1    | YML072C | TCB3    | 0.3480 | 0.2783  |
| YCR031C   | RPS14a  | YNL135C | FPR1    | 0.3479 | 0.1769  |
| YDR134C   | YDR134C | YKL110C | KTI12   | 0.3479 | -0.0493 |
| YGL207W   | SPT16   | YDR420W | HKR1    | 0.3479 | 0.3112  |
| YJR074W   | MOG1    | YML091C | RPM2    | 0.3479 | -0.0778 |
| YDL133W   | SRF1    | YER046W | SPO73   | 0.3478 | 0.1772  |
| YGR157W   | CHO2    | YNL215W | IES2    | 0.3478 | -0.2843 |
| YOR131C   | YOR131C | YPL064C | CWC27   | 0.3477 | 0.1276  |
| YBL029W   | YBL029W | YGR258C | RAD2    | 0.3475 | 0.1024  |
| YCL018W   | LEU2    | YGL257C | MNT2    | 0.3475 | 0.1335  |
| YMR209C   | YMR209C | YFR013W | IOC3    | 0.3473 | -0.1177 |
| YOR101W   | RAS1    | YML013W | UBX2    | 0.3473 | -0.2264 |
| YOR131C   | YOR131C | YGR258C | RAD2    | 0.3473 | -0.0542 |
| YML038C   | YMD8    | YOR196C | LIP5    | 0.3472 | 0.0972  |
| YNL322C   | KRE1    | YFR004W | RPN11   | 0.3472 | 0.1934  |
| YOL164W   | BDS1    | YJL149W | DAS1    | 0.3469 | 0.0712  |
| YJR040W   | GEF1    | YLR443W | ECM7    | 0.3466 | 0.0813  |
| YBR008C   | FLR1    | YER022W | SRB4    | 0.3465 | -0.1418 |
| YGL178W   | MPT5    | YBR196C | PGI1    | 0.3465 | 0.0281  |
| YGR222W   | PET54   | YGR001C | EFM5    | 0.3465 | 0.0965  |
| YML098W   | TAF13   | YJR074W | MOG1    | 0.3465 | 0.0694  |
| YOR251C   | TUM1    | YDR180W | SCC2    | 0.3463 | 0.0975  |
| YBL020W   | RFT1    | YJR032W | CPR7    | 0.3462 | -0.2169 |
| YOL092W   | YPQ1    | YDL111C | RRP42   | 0.3462 | 0.0003  |
| YJR036C   | HUL4    | YGL035C | MIG1    | 0.3461 | -0.0093 |
| YGL226C-A | OST5    | YDR481C | PHO8    | 0.3460 | -0.0907 |
| YGL178W   | MPT5    | YNR034W | SOL1    | 0.3460 | -0.0669 |
| YFL049W   | SWP82   | YML098W | TAF13   | 0.3459 | 0.1938  |
| YDR321W   | ASP1    | YLL024C | SSA2    | 0.3458 | 0.2065  |
| YFR011C   | MIC19   | YNL321W | VNX1    | 0.3456 | 0.1926  |
| YBR274W   | CHK1    | YER035W | EDC2    | 0.3455 | -0.0365 |
| YGR012W   | MCY1    | YBR161W | CSH1    | 0.3455 | -0.1510 |
| YHR050W   | SMF2    | YJL187C | SWE1    | 0.3453 | 0.0248  |
| YLR155C   | ASP3-1  | YIL158W | AIM20   | 0.3452 | -0.0066 |
| YIL165C   | YIL165C | YKL116C | PRR1    | 0.3449 | -0.2459 |
| YJL036W   | SNX4    | YJR008W | MHO1    | 0.3446 | 0.1074  |
| YBR196C   | PGI1    | YML071C | COG8    | 0.3444 | -0.0313 |
| YGL193C   | YGL193C | YKL116C | PRR1    | 0.3444 | -0.0325 |
| YIL133C   | RPL16a  | YDR144C | MKC7    | 0.3443 | 0.2724  |
| YKR085C   | MRPL20  | YNL046W | YNL046W | 0.3443 | -0.1945 |
| YOR251C   | TUM1    | YNL046W | YNL046W | 0.3443 | 0.1038  |
| YER019W   | ISC1    | YLR176C | RFX1    | 0.3442 | 0.1063  |
| YEL076W-C | Unknown | YHR063C | PAN5    | 0.3441 | -0.0185 |
| YJR084W   | YJR084W | YDR383C | NKP1    | 0.3441 | 0.0323  |
| YBR163W   | EXO5    | YBR121C | GRS1    | 0.3440 | 0.0576  |
| YJL204C   | RCY1    | YLR206W | ENT2    | 0.3439 | -0.0530 |
| YCL026C-A | FRM2    | YLR455W | PDP3    | 0.3438 | -0.1218 |

|         |         |           |         |        |         |
|---------|---------|-----------|---------|--------|---------|
| YJL187C | SWE1    | YOR144C   | ELG1    | 0.3437 | 0.0716  |
| YDR351W | SBE2    | YML038C   | YMD8    | 0.3436 | 0.1006  |
| YMR154C | RIM13   | YDR383C   | NKP1    | 0.3435 | 0.1047  |
| YDL116W | NUP84   | YML098W   | TAF13   | 0.3434 | -0.0362 |
| YGR168C | YGR168C | YBR161W   | CSH1    | 0.3434 | 0.0416  |
| YIL040W | APQ12   | YGL226C-A | OST5    | 0.3434 | 0.1208  |
| YJL217W | REE1    | YIL061C   | SNP1    | 0.3434 | -0.0097 |
| YPL001W | HAT1    | YDR178W   | SDH4    | 0.3434 | -0.0525 |
| YJL154C | VPS35   | YGR258C   | RAD2    | 0.3432 | -0.0003 |
| YDR524C | AGE1    | YLR257W   | YLR257W | 0.3431 | 0.0186  |
| YMR067C | UBX4    | YGL169W   | SUA5    | 0.3429 | 0.2048  |
| YGR211W | ZPR1    | YNL200C   | NNR1    | 0.3428 | -0.0277 |
| YER046W | SPO73   | YHR034C   | PIH1    | 0.3427 | 0.0054  |
| YGL169W | SUA5    | YOR088W   | YOR088W | 0.3427 | 0.1261  |
| YIL111W | COX5b   | YPL009C   | RQC2    | 0.3427 | -0.1568 |
| YBR154C | RPB5    | YBR087W   | RFC5    | 0.3426 | 0.0342  |
| YCR083W | TRX3    | YAL009W   | SPO7    | 0.3425 | 0.1332  |
| YJR032W | CPR7    | YKL184W   | SPE1    | 0.3425 | 0.1545  |
| YKR085C | MRPL20  | YNL074C   | MLF3    | 0.3424 | -0.2494 |
| YLR096W | KIN2    | YJL047C   | RTT101  | 0.3423 | 0.0958  |
| YOR371C | GPB1    | YKL183W   | LOT5    | 0.3421 | 0.1616  |
| YJR040W | GEF1    | YMR115W   | MGR3    | 0.3420 | -0.0575 |
| YPL031C | PHO85   | YDR513W   | GRX2    | 0.3420 | 0.0288  |
| YEL058W | PCM1    | YHR043C   | DOG2    | 0.3416 | 0.0524  |
| YBR196C | PGI1    | YGL226W   | MTC3    | 0.3415 | -0.0581 |
| YIR022W | SEC11   | YGL195W   | GCN1    | 0.3414 | 0.0868  |
| YBL029W | YBL029W | YML071C   | COG8    | 0.3413 | -0.0052 |
| YCR083W | TRX3    | YML091C   | RPM2    | 0.3412 | -0.0959 |
| YKL160W | ELF1    | YGL192W   | IME4    | 0.3411 | -0.1119 |
| YBR147W | RTC2    | YAL056W   | GPB2    | 0.3410 | 0.1927  |
| YBR239C | ERT1    | YBR166C   | TYR1    | 0.3410 | 0.0838  |
| YML098W | TAF13   | YDL116W   | NUP84   | 0.3410 | -0.0975 |
| YKL019W | RAM2    | YNL041C   | COG6    | 0.3407 | -0.1071 |
| YGL208W | SIP2    | YOL147C   | PEX11   | 0.3406 | 0.1046  |
| YPL233W | NSL1    | YFL018C   | LPD1    | 0.3406 | -0.0054 |
| YOL088C | MPD2    | YOR092W   | ECM3    | 0.3405 | 0.0001  |
| YOL081W | IRA2    | YJL126W   | NIT2    | 0.3405 | -0.0653 |
| YJR008W | MHO1    | YOL130W   | ALR1    | 0.3403 | -0.1635 |
| YOL113W | SKM1    | YOL018C   | TLG2    | 0.3402 | 0.0893  |
| YFR004W | RPN11   | YLR330W   | CHS5    | 0.3401 | 0.1337  |
| YGL004C | RPN14   | YPL064C   | CWC27   | 0.3401 | -0.0258 |
| YGR288W | MAL13   | YJL187C   | SWE1    | 0.3401 | -0.1892 |
| YHR027C | RPN1    | YLR426W   | TDA5    | 0.3401 | -0.2109 |
| YGR001C | EFM5    | YER186C   | YER186C | 0.3400 | 0.0406  |
| YJR036C | HUL4    | YJL036W   | SNX4    | 0.3400 | 0.1765  |
| YLR096W | KIN2    | YOL088C   | MPD2    | 0.3400 | -0.1680 |
| YGL193C | YGL193C | YHL007C   | STE20   | 0.3399 | -0.0503 |

|         |         |         |         |        |         |
|---------|---------|---------|---------|--------|---------|
| YIL066C | RNR3    | YLR426W | TDA5    | 0.3399 | -0.0953 |
| YER049W | TPA1    | YIL142W | CCT2    | 0.3396 | 0.2509  |
| YKL019W | RAM2    | YOR051C | ETT1    | 0.3396 | -0.1049 |
| YGL192W | IME4    | YKL110C | KTI12   | 0.3395 | -0.0666 |
| YOL062C | APM4    | YIR026C | YVH1    | 0.3394 | -0.1087 |
| YOR144C | ELG1    | YLR435W | TSR2    | 0.3394 | 0.2177  |
| YOR092W | ECM3    | YHR023W | MYO1    | 0.3393 | -0.1156 |
| YAL009W | SPO7    | YBR077C | SLM4    | 0.3390 | 0.0007  |
| YJL126W | NIT2    | YDL103C | QRI1    | 0.3390 | 0.0680  |
| YJL118W | YJL118W | YGL017W | ATE1    | 0.3390 | -0.0365 |
| YOR054C | VHS3    | YDR144C | MKC7    | 0.3390 | -0.1053 |
| YBR229C | ROT2    | YGR152C | RSR1    | 0.3389 | -0.1004 |
| YKL116C | PRR1    | YGR168C | YGR168C | 0.3388 | 0.1345  |
| YOR131C | YOR131C | YGL169W | SUA5    | 0.3387 | -0.1160 |
| YGR157W | CHO2    | YKL116C | PRR1    | 0.3385 | 0.1473  |
| YHL048W | COS8    | YHR054C | YHR054C | 0.3385 | 0.0868  |
| YLR375W | STP3    | YDL103C | QRI1    | 0.3384 | -0.1096 |
| YDR531W | CAB1    | YMR067C | UBX4    | 0.3383 | -0.1145 |
| YNR034W | SOL1    | YLR248W | RCK2    | 0.3383 | -0.0897 |
| YBR161W | CSH1    | YGR012W | MCY1    | 0.3382 | -0.0497 |
| YEL056W | HAT2    | YIL061C | SNP1    | 0.3382 | -0.2116 |
| YLR452C | SST2    | YDR058C | TGL2    | 0.3382 | -0.0683 |
| YKL021C | MAK11   | YPL183C | RTT10   | 0.3379 | 0.0960  |
| YLR443W | ECM7    | YDR441C | APT2    | 0.3377 | -0.0349 |
| YDR441C | APT2    | YMR152W | YIM1    | 0.3376 | -0.0128 |
| YKR075C | YKR075C | YOL026C | MIM1    | 0.3376 | -0.0831 |
| YML110C | COQ5    | YJR032W | CPR7    | 0.3373 | 0.0843  |
| YBR087W | RFC5    | YLR176C | RFX1    | 0.3371 | -0.1386 |
| YER116C | SLX8    | YGL178W | MPT5    | 0.3371 | 0.1745  |
| YFL016C | MDJ1    | YOL088C | MPD2    | 0.3369 | -0.1227 |
| YIL040W | APQ12   | YMR046C | YMR046C | 0.3369 | -0.0495 |
| YOL093W | TRM10   | YDL002C | NHP10   | 0.3369 | 0.2100  |
| YOL088C | MPD2    | YGR168C | YGR168C | 0.3369 | 0.1172  |
| YLR052W | IES3    | YLR455W | PDP3    | 0.3368 | 0.0484  |
| YDR058C | TGL2    | YGR157W | CHO2    | 0.3367 | -0.1224 |
| YKL019W | RAM2    | YOR117W | RPT5    | 0.3367 | 0.0770  |
| YPL144W | POC4    | YOR142W | LSC1    | 0.3367 | 0.0957  |
| YGR149W | GPC1    | YJR008W | MHO1    | 0.3366 | 0.1130  |
| YDL155W | CLB3    | YLL024C | SSA2    | 0.3364 | 0.0471  |
| YDL133W | SRF1    | YLR046C | YLR046C | 0.3364 | 0.1310  |
| YER023W | PRO3    | YJL158C | CIS3    | 0.3364 | 0.2692  |
| YIL061C | SNP1    | YDR515W | SLF1    | 0.3364 | 0.0686  |
| YCL018W | LEU2    | YLL024C | SSA2    | 0.3363 | 0.1204  |
| YDR134C | YDR134C | YGR023W | MTL1    | 0.3361 | 0.0562  |
| YKL096W | CWP1    | YDL217C | TIM22   | 0.3360 | -0.1458 |
| YDR367W | KEI1    | YBR071W | YBR071W | 0.3356 | -0.0325 |
| YPL058C | PDR12   | YLR455W | PDP3    | 0.3356 | -0.1542 |

|         |         |         |         |        |         |
|---------|---------|---------|---------|--------|---------|
| YBR061C | TRM7    | YBR166C | TYR1    | 0.3355 | 0.1761  |
| YIL111W | COX5b   | YNL034W | YNL034W | 0.3354 | -0.0620 |
| YKL021C | MAK11   | YGR028W | MSP1    | 0.3354 | -0.3002 |
| YGL053W | PRM8    | YER035W | EDC2    | 0.3353 | 0.0444  |
| YBR071W | YBR071W | YBL040C | ERD2    | 0.3352 | 0.0062  |
| YDR058C | TGL2    | YLL024C | SSA2    | 0.3352 | -0.1481 |
| YFR013W | IOC3    | YOR131C | YOR131C | 0.3352 | 0.0456  |
| YLR452C | SST2    | YKL116C | PRR1    | 0.3352 | 0.1071  |
| YMR005W | TAF4    | YER046W | SPO73   | 0.3352 | -0.0122 |
| YDL211C | YDL211C | YMR005W | TAF4    | 0.3351 | -0.0163 |
| YDL103C | QRI1    | YGR006W | PRP18   | 0.3351 | 0.1708  |
| YER022W | SRB4    | YKL021C | MAK11   | 0.3351 | 0.0553  |
| YLL061W | MMP1    | YER035W | EDC2    | 0.3351 | -0.0640 |
| YLL024C | SSA2    | YJR086W | STE18   | 0.3351 | 0.1445  |
| YOL089C | HAL9    | YGL226W | MTC3    | 0.3351 | -0.0896 |
| YBR071W | YBR071W | YBR161W | CSH1    | 0.3350 | 0.0038  |
| YGR149W | GPC1    | YGR194C | XKS1    | 0.3350 | 0.0424  |
| YNL329C | PEX6    | YDL150W | RPC53   | 0.3350 | -0.0752 |
| YIL046W | MET30   | YHR043C | DOG2    | 0.3349 | -0.1135 |
| YAR028W | YAR028W | YBR239C | ERT1    | 0.3348 | -0.0177 |
| YLR389C | STE23   | YAL009W | SPO7    | 0.3348 | -0.0231 |
| YGR288W | MAL13   | YNL041C | COG6    | 0.3346 | 0.2265  |
| YKR052C | MRS4    | YLR096W | KIN2    | 0.3346 | -0.0001 |
| YJL058C | BIT61   | YLR206W | ENT2    | 0.3342 | -0.0245 |
| YCL024W | KCC4    | YOR264W | DSE3    | 0.3341 | 0.1961  |
| YDR513W | GRX2    | YNL329C | PEX6    | 0.3341 | -0.1329 |
| YFR037C | RSC8    | YGL035C | MIG1    | 0.3338 | 0.1486  |
| YHR016C | YSC84   | YDR339C | FCF1    | 0.3337 | -0.0757 |
| YML110C | COQ5    | YPL234C | VMA11   | 0.3337 | 0.1023  |
| YER023W | PRO3    | YML013W | UBX2    | 0.3336 | 0.1554  |
| YHL048W | COS8    | YFR047C | BNA6    | 0.3335 | 0.0922  |
| YLR181C | VTA1    | YIL166C | YIL166C | 0.3335 | 0.2330  |
| YPL031C | PHO85   | YJL030W | MAD2    | 0.3335 | 0.0039  |
| YIL061C | SNP1    | YDR497C | ITR1    | 0.3334 | 0.0651  |
| YLR248W | RCK2    | YBR168W | PEX32   | 0.3334 | 0.1098  |
| YHL048W | COS8    | YGR001C | EFM5    | 0.3333 | 0.1298  |
| YML038C | YMD8    | YHR043C | DOG2    | 0.3333 | -0.1734 |
| YEL068C | YEL068C | YBR274W | CHK1    | 0.3330 | 0.1069  |
| YOL018C | TLG2    | YNL035C | YNL035C | 0.3329 | 0.1608  |
| YDR531W | CAB1    | YFL056C | AAD6    | 0.3328 | 0.2299  |
| YJL218W | YJL218W | YKL125W | RRN3    | 0.3326 | 0.0010  |
| YOR051C | ETT1    | YDL002C | NHP10   | 0.3322 | 0.1276  |
| YGL004C | RPN14   | YPL001W | HAT1    | 0.3319 | 0.0529  |
| YFR013W | IOC3    | YFL016C | MDJ1    | 0.3316 | 0.0044  |
| YJR036C | HUL4    | YGR258C | RAD2    | 0.3315 | 0.0961  |
| YJL058C | BIT61   | YKL073W | LHS1    | 0.3313 | 0.0488  |
| YHR115C | DMA1    | YJR068W | RFC2    | 0.3311 | -0.0155 |

|         |         |         |         |        |         |
|---------|---------|---------|---------|--------|---------|
| YJL212C | OPT1    | YJL051W | IRC8    | 0.3311 | 0.1309  |
| YJR025C | BNA1    | YER144C | UBP5    | 0.3311 | -0.1011 |
| YJL149W | DAS1    | YAL009W | SPO7    | 0.3310 | -0.0396 |
| YJR097W | JJJ3    | YBL105C | PKC1    | 0.3309 | -0.1134 |
| YIL166C | YIL166C | YDL164C | CDC9    | 0.3308 | -0.0044 |
| YOR054C | VHS3    | YGR150C | CCM1    | 0.3307 | 0.0334  |
| YHR039C | MSC7    | YGR149W | GPC1    | 0.3306 | 0.1716  |
| YBR087W | RFC5    | YBR161W | CSH1    | 0.3303 | 0.1143  |
| YER019W | ISC1    | YJR040W | GEF1    | 0.3303 | 0.0144  |
| YJR036C | HUL4    | YIL040W | APQ12   | 0.3302 | -0.0332 |
| YML091C | RPM2    | YJR086W | STE18   | 0.3301 | 0.1022  |
| YIL165C | YIL165C | YJL158C | CIS3    | 0.3300 | -0.0545 |
| YOL130W | ALR1    | YDR524C | AGE1    | 0.3300 | 0.1539  |
| YEL021W | URA3    | YOL088C | MPD2    | 0.3299 | -0.0668 |
| YML007W | YAP1    | YFR013W | IOC3    | 0.3299 | -0.0026 |
| YJL208C | NUC1    | YIR022W | SEC11   | 0.3298 | -0.0157 |
| YJL212C | OPT1    | YOR101W | RAS1    | 0.3296 | 0.0711  |
| YOL147C | PEX11   | YOR043W | WHI2    | 0.3296 | -0.0294 |
| YBR077C | SLM4    | YOL062C | APM4    | 0.3295 | 0.0964  |
| YGL025C | PGD1    | YGR168C | YGR168C | 0.3295 | 0.0842  |
| YDL164C | CDC9    | YGL207W | SPT16   | 0.3294 | 0.1128  |
| YPL234C | VMA11   | YDL147W | RPN5    | 0.3294 | -0.0563 |
| YHR023W | MYO1    | YLR375W | STP3    | 0.3291 | -0.1466 |
| YOR043W | WHI2    | YGR006W | PRP18   | 0.3291 | 0.0600  |
| YDL103C | QRI1    | YJL126W | NIT2    | 0.3289 | 0.1476  |
| YGR157W | CHO2    | YOR051C | ETT1    | 0.3289 | 0.1360  |
| YKR080W | MTD1    | YHR034C | PIH1    | 0.3289 | -0.0931 |
| YGL053W | PRM8    | YML048W | GSF2    | 0.3288 | -0.0127 |
| YDR528W | HLR1    | YBR137W | YBR137W | 0.3287 | 0.0411  |
| YIL046W | MET30   | YBR121C | GRS1    | 0.3287 | -0.0645 |
| YJL030W | MAD2    | YFR004W | RPN11   | 0.3287 | 0.1281  |
| YLR176C | RFX1    | YBL020W | RFT1    | 0.3287 | -0.0015 |
| YJL149W | DAS1    | YER144C | UBP5    | 0.3286 | 0.0342  |
| YJR032W | CPR7    | YIL158W | AIM20   | 0.3286 | 0.1070  |
| YDL171C | GLT1    | YBL040C | ERD2    | 0.3285 | -0.1073 |
| YOR251C | TUM1    | YPL144W | POC4    | 0.3284 | 0.2893  |
| YDL180W | YDL180W | YLR057W | MNL2    | 0.3283 | 0.0302  |
| YFR047C | BNA6    | YHR054C | YHR054C | 0.3283 | 0.0516  |
| YLR047C | FRE8    | YJL163C | YJL163C | 0.3283 | 0.0864  |
| YLR181C | VTA1    | YLR455W | PDP3    | 0.3282 | 0.1193  |
| YLR056W | ERG3    | YJR074W | MOG1    | 0.3274 | 0.0844  |
| YNL242W | ATG2    | YOL147C | PEX11   | 0.3274 | 0.0488  |
| YDR524C | AGE1    | YIL009W | FAA3    | 0.3272 | 0.1538  |
| YNL124W | NAF1    | YMR005W | TAF4    | 0.3272 | 0.0582  |
| YIL111W | COX5b   | YBL020W | RFT1    | 0.3271 | -0.0581 |
| YLL040C | VPS13   | YOL062C | APM4    | 0.3271 | -0.0669 |
| YDL155W | CLB3    | YBR157C | ICS2    | 0.3270 | -0.0027 |

|           |         |           |         |        |         |
|-----------|---------|-----------|---------|--------|---------|
| YDR367W   | KEI1    | YKR051W   | YKR051W | 0.3270 | 0.0684  |
| YOL089C   | HAL9    | YNL135C   | FPR1    | 0.3270 | -0.0897 |
| YOL026C   | MIM1    | YEL055C   | POL5    | 0.3270 | 0.0012  |
| YEL020W-A | TIM9    | YHR023W   | MYO1    | 0.3269 | -0.2196 |
| YIL061C   | SNP1    | YER022W   | SRB4    | 0.3268 | -0.1457 |
| YLL028W   | TPO1    | YGL208W   | SIP2    | 0.3268 | 0.1086  |
| YFL047W   | RGD2    | YEL058W   | PCM1    | 0.3266 | 0.0837  |
| YLR426W   | TDA5    | YCL009C   | ILV6    | 0.3266 | 0.0335  |
| YGR168C   | YGR168C | YDL116W   | NUP84   | 0.3265 | 0.0050  |
| YOL026C   | MIM1    | YCR031C   | RPS14a  | 0.3265 | 0.0432  |
| YGL207W   | SPT16   | YHR023W   | MYO1    | 0.3264 | 0.0776  |
| YBR077C   | SLM4    | YEL056W   | HAT2    | 0.3262 | 0.0087  |
| YLR375W   | STP3    | YJR074W   | MOG1    | 0.3262 | 0.1587  |
| YOL073C   | DSC2    | YOR142W   | LSC1    | 0.3261 | 0.1967  |
| YHR016C   | YSC84   | YOR144C   | ELG1    | 0.3259 | -0.2002 |
| YDL133W   | SRF1    | YDR058C   | TGL2    | 0.3258 | 0.0237  |
| YER116C   | SLX8    | YDL132W   | CDC53   | 0.3258 | 0.0504  |
| YLR176C   | RFX1    | YIL009W   | FAA3    | 0.3258 | 0.0219  |
| YLR231C   | BNA5    | YNL322C   | KRE1    | 0.3256 | 0.0037  |
| YJR056C   | YJR056C | YLR455W   | PDP3    | 0.3255 | 0.0004  |
| YNL321W   | VNX1    | YKL067W   | YNK1    | 0.3254 | -0.0390 |
| YER185W   | PUG1    | YNL135C   | FPR1    | 0.3252 | -0.0267 |
| YML038C   | YMD8    | YDL133W   | SRF1    | 0.3249 | 0.0363  |
| YJL183W   | MNN11   | YJL030W   | MAD2    | 0.3248 | 0.0554  |
| YBR071W   | YBR071W | YEL076W-C | Unknown | 0.3243 | -0.1383 |
| YJL058C   | BIT61   | YOR033C   | EXO1    | 0.3242 | -0.0424 |
| YKL183W   | LOT5    | YML091C   | RPM2    | 0.3242 | -0.1428 |
| YLL040C   | VPS13   | YBL014C   | RRN6    | 0.3242 | -0.0005 |
| YGL207W   | SPT16   | YGR152C   | RSR1    | 0.3241 | 0.0844  |
| YOR080W   | DIA2    | YOR251C   | TUM1    | 0.3241 | 0.1769  |
| YER088C   | DOT6    | YLR368W   | MDM30   | 0.3240 | -0.1378 |
| YJL204C   | RCY1    | YBR163W   | EXO5    | 0.3240 | 0.0125  |
| YML007W   | YAP1    | YHR043C   | DOG2    | 0.3238 | -0.1278 |
| YDR497C   | ITR1    | YDR513W   | GRX2    | 0.3237 | 0.0638  |
| YIR022W   | SEC11   | YLL024C   | SSA2    | 0.3235 | 0.0583  |
| YGR152C   | RSR1    | YBR229C   | ROT2    | 0.3233 | -0.0010 |
| YLR059C   | REX2    | YBL030C   | PET9    | 0.3232 | 0.1346  |
| YLR452C   | SST2    | YBL014C   | RRN6    | 0.3229 | -0.0489 |
| YOR251C   | TUM1    | YGL035C   | MIG1    | 0.3229 | -0.1350 |
| YIL061C   | SNP1    | YDR528W   | HLR1    | 0.3228 | 0.0077  |
| YJR008W   | MHO1    | YER046W   | SPO73   | 0.3227 | 0.0878  |
| YLR181C   | VTA1    | YOL062C   | APM4    | 0.3227 | 0.1427  |
| YMR215W   | GAS3    | YMR209C   | YMR209C | 0.3226 | 0.2233  |
| YBL079W   | NUP170  | YKL096W   | CWP1    | 0.3225 | -0.1894 |
| YER037W   | PHM8    | YDR144C   | MKC7    | 0.3225 | -0.0899 |
| YGR012W   | MCY1    | YDR319C   | YFT2    | 0.3225 | -0.2171 |
| YLR330W   | CHS5    | YMR046C   | YMR046C | 0.3225 | 0.0038  |

|         |         |         |         |        |         |
|---------|---------|---------|---------|--------|---------|
| YNR012W | URK1    | YBL014C | RRN6    | 0.3224 | 0.1029  |
| YGR006W | PRP18   | YGL208W | SIP2    | 0.3223 | 0.0522  |
| YHR033W | YHR033W | YIL040W | APQ12   | 0.3223 | 0.0505  |
| YHR115C | DMA1    | YFL016C | MDJ1    | 0.3222 | 0.0428  |
| YOL088C | MPD2    | YDR339C | FCF1    | 0.3222 | 0.0002  |
| YDR319C | YFT2    | YLR176C | RFX1    | 0.3220 | -0.0789 |
| YER182W | FMP10   | YIL158W | AIM20   | 0.3220 | 0.0405  |
| YBR067C | TIP1    | YKL092C | BUD2    | 0.3218 | -0.0928 |
| YDL171C | GLT1    | YDL116W | NUP84   | 0.3217 | 0.1286  |
| YGL035C | MIG1    | YOL113W | SKM1    | 0.3217 | -0.0338 |
| YDL132W | CDC53   | YIR022W | SEC11   | 0.3214 | 0.0036  |
| YNL074C | MLF3    | YDR367W | KEI1    | 0.3214 | -0.0018 |
| YPR022C | SDD4    | YDR134C | YDR134C | 0.3214 | -0.0765 |
| YDL167C | NRP1    | YDR420W | HKR1    | 0.3213 | 0.2568  |
| YOR371C | GPB1    | YML013W | UBX2    | 0.3213 | 0.0186  |
| YMR005W | TAF4    | YGR168C | YGR168C | 0.3209 | -0.0625 |
| YBL029W | YBL029W | YJL126W | NIT2    | 0.3208 | 0.1058  |
| YER185W | PUG1    | YLR059C | REX2    | 0.3208 | -0.1091 |
| YDL171C | GLT1    | YJL187C | SWE1    | 0.3207 | -0.1539 |
| YGR194C | XKS1    | YML004C | GLO1    | 0.3207 | 0.0712  |
| YJR103W | URA8    | YFR013W | IOC3    | 0.3206 | -0.1966 |
| YAL009W | SPO7    | YGL192W | IME4    | 0.3203 | -0.0630 |
| YMR192W | GYL1    | YKL096W | CWP1    | 0.3202 | -0.0262 |
| YHR023W | MYO1    | YDR178W | SDH4    | 0.3201 | -0.2056 |
| YOL081W | IRA2    | YGR012W | MCY1    | 0.3201 | -0.1768 |
| YBR126C | TPS1    | YML004C | GLO1    | 0.3199 | 0.1734  |
| YLR231C | BNA5    | YJR040W | GEF1    | 0.3199 | 0.0101  |
| YOR117W | RPT5    | YKL116C | PRR1    | 0.3199 | -0.0534 |
| YOL043C | NTG2    | YNL041C | COG6    | 0.3198 | 0.0418  |
| YPL009C | RQC2    | YER182W | FMP10   | 0.3198 | -0.0782 |
| YFR047C | BNA6    | YGR168C | YGR168C | 0.3193 | -0.1306 |
| YOL164W | BDS1    | YPL237W | SUI3    | 0.3192 | -0.0442 |
| YOR054C | VHS3    | YJL204C | RCY1    | 0.3191 | -0.2462 |
| YJR086W | STE18   | YNL322C | KRE1    | 0.3189 | 0.0664  |
| YER037W | PHM8    | YDR515W | SLF1    | 0.3187 | -0.0887 |
| YER185W | PUG1    | YOR371C | GPB1    | 0.3186 | 0.0026  |
| YHR029C | YHI9    | YDR530C | APA2    | 0.3186 | 0.2060  |
| YMR067C | UBX4    | YGL017W | ATE1    | 0.3185 | 0.0590  |
| YPL144W | POC4    | YDR481C | PHO8    | 0.3185 | -0.0436 |
| YJR040W | GEF1    | YOR196C | LIP5    | 0.3184 | -0.0768 |
| YOL062C | APM4    | YFL047W | RGD2    | 0.3184 | 0.0357  |
| YGL226W | MTC3    | YMR067C | UBX4    | 0.3183 | 0.0400  |
| YML098W | TAF13   | YGL226W | MTC3    | 0.3183 | 0.0625  |
| YPL147W | PXA1    | YOR142W | LSC1    | 0.3183 | 0.0039  |
| YDL133W | SRF1    | YGR157W | CHO2    | 0.3182 | 0.0362  |
| YPL234C | VMA11   | YER023W | PRO3    | 0.3180 | 0.0429  |
| YBL020W | RFT1    | YGL051W | MST27   | 0.3179 | 0.0938  |



|           |         |         |         |        |         |
|-----------|---------|---------|---------|--------|---------|
| YER019W   | ISC1    | YER088C | DOT6    | 0.3177 | 0.0297  |
| YJL051W   | IRC8    | YLR046C | YLR046C | 0.3175 | 0.0104  |
| YJL171C   | TOH1    | YOR088W | YOR088W | 0.3173 | -0.1109 |
| YER186C   | YER186C | YMR046C | YMR046C | 0.3172 | -0.0164 |
| YIR022W   | SEC11   | YKL160W | ELF1    | 0.3171 | 0.0087  |
| YJL171C   | TOH1    | YJL126W | NIT2    | 0.3171 | -0.1273 |
| YLL024C   | SSA2    | YLR443W | ECM7    | 0.3171 | 0.0486  |
| YMR062C   | ARG7    | YJL171C | TOH1    | 0.3171 | 0.1695  |
| YOR389W   | YOR389W | YAL009W | SPO7    | 0.3171 | -0.0468 |
| YNR034W   | SOL1    | YBR069C | TAT1    | 0.3170 | -0.0419 |
| YGL017W   | ATE1    | YGR207C | CIR1    | 0.3168 | -0.0730 |
| YOL062C   | APM4    | YOR088W | YOR088W | 0.3166 | -0.0966 |
| YOR033C   | EXO1    | YDL002C | NHP10   | 0.3165 | 0.1422  |
| YCR071C   | IMG2    | YML098W | TAF13   | 0.3163 | -0.1288 |
| YJL158C   | CIS3    | YKR080W | MTD1    | 0.3163 | -0.1831 |
| YJL030W   | MAD2    | YOL088C | MPD2    | 0.3160 | 0.0904  |
| YJL154C   | VPS35   | YER144C | UBP5    | 0.3159 | 0.0710  |
| YGR150C   | CCM1    | YOR103C | OST2    | 0.3157 | -0.0471 |
| YIL111W   | COX5b   | YJL047C | RTT101  | 0.3155 | 0.0913  |
| YJL149W   | DAS1    | YMR152W | YIM1    | 0.3153 | 0.0323  |
| YBR067C   | TIP1    | YJL163C | YJL163C | 0.3151 | 0.1073  |
| YFR013W   | IOC3    | YLR206W | ENT2    | 0.3151 | 0.0211  |
| YMR067C   | UBX4    | YDR144C | MKC7    | 0.3150 | 0.0424  |
| YFR013W   | IOC3    | YGL192W | IME4    | 0.3149 | 0.0750  |
| YBL040C   | ERD2    | YOR051C | ETT1    | 0.3147 | -0.0441 |
| YDR178W   | SDH4    | YGR168C | YGR168C | 0.3146 | -0.1976 |
| YMR112C   | MED11   | YMR123W | PKR1    | 0.3146 | 0.0460  |
| YDL097C   | RPN6    | YML098W | TAF13   | 0.3145 | -0.0582 |
| YIL043C   | CBR1    | YDL111C | RRP42   | 0.3144 | 0.2140  |
| YKL110C   | KTI12   | YGR258C | RAD2    | 0.3144 | -0.0527 |
| YOL113W   | SKM1    | YKL096W | CWP1    | 0.3144 | -0.0544 |
| YPR015C   | YPR015C | YJL178C | ATG27   | 0.3144 | -0.0357 |
| YLL035W   | GRC3    | YFL018C | LPD1    | 0.3141 | -0.1035 |
| YNL326C   | PFA3    | YLR455W | PDP3    | 0.3141 | 0.0344  |
| YOL092W   | YPQ1    | YOL097C | WRS1    | 0.3139 | 0.1217  |
| YPR196W   | YPR196W | YLR057W | MNL2    | 0.3139 | -0.0145 |
| YJL047C   | RTT101  | YMR209C | YMR209C | 0.3138 | 0.2110  |
| YKL125W   | RRN3    | YDL167C | NRP1    | 0.3138 | 0.2016  |
| YER026C   | CHO1    | YNR036C | MRPS12  | 0.3136 | 0.0226  |
| YDR339C   | FCF1    | YER022W | SRB4    | 0.3135 | 0.1228  |
| YFL049W   | SWP82   | YLR172C | DPH5    | 0.3135 | -0.0570 |
| YGL226C-A | OST5    | YPL237W | SUI3    | 0.3135 | 0.0723  |
| YLR426W   | TDA5    | YLR237W | THI7    | 0.3135 | -0.0529 |
| YBL105C   | PKC1    | YML036W | CGI121  | 0.3134 | -0.0212 |
| YBL030C   | PET9    | YGR208W | SER2    | 0.3134 | -0.0748 |
| YFR047C   | BNA6    | YOL130W | ALR1    | 0.3134 | -0.1415 |
| YGL051W   | MST27   | YML036W | CGI121  | 0.3133 | -0.0149 |

|           |         |         |         |        |         |
|-----------|---------|---------|---------|--------|---------|
| YMR112C   | MED11   | YKL073W | LHS1    | 0.3131 | 0.0287  |
| YDL089W   | NUR1    | YDR441C | APT2    | 0.3129 | -0.0791 |
| YHR029C   | YHI9    | YMR010W | ANY1    | 0.3129 | -0.1692 |
| YMR123W   | PKR1    | YMR112C | MED11   | 0.3128 | 0.0233  |
| YPL144W   | POC4    | YGR258C | RAD2    | 0.3128 | -0.0288 |
| YBR222C   | PCS60   | YJR103W | URA8    | 0.3127 | 0.0202  |
| YDR351W   | SBE2    | YER182W | FMP10   | 0.3127 | -0.0270 |
| YDR383C   | NKP1    | YOL147C | PEX11   | 0.3127 | -0.0136 |
| YBL020W   | RFT1    | YJL171C | TOH1    | 0.3124 | 0.0001  |
| YJR103W   | URA8    | YJL149W | DAS1    | 0.3123 | 0.1734  |
| YNL326C   | PFA3    | YLR430W | SEN1    | 0.3123 | -0.0619 |
| YKL184W   | SPE1    | YLR046C | YLR046C | 0.3122 | -0.2135 |
| YDR321W   | ASP1    | YNL280C | ERG24   | 0.3121 | 0.1044  |
| YGR152C   | RSR1    | YDL047W | SIT4    | 0.3119 | 0.0903  |
| YMR067C   | UBX4    | YJL204C | RCY1    | 0.3119 | 0.1476  |
| YOR043W   | WHI2    | YBR196C | PGI1    | 0.3119 | -0.0434 |
| YHR050W   | SMF2    | YPL058C | PDR12   | 0.3117 | -0.1133 |
| YIL066C   | RNR3    | YOL081W | IRA2    | 0.3117 | 0.0603  |
| YLR455W   | PDP3    | YGR158C | MTR3    | 0.3117 | 0.0718  |
| YPL237W   | SUI3    | YJR068W | RFC2    | 0.3117 | 0.4250  |
| YCL009C   | ILV6    | YGL208W | SIP2    | 0.3116 | -0.0508 |
| YIL166C   | YIL166C | YHR029C | YHI9    | 0.3113 | 0.0328  |
| YER144C   | UBP5    | YIL082W | Unknown | 0.3112 | -0.0008 |
| YEL076W-C | Unknown | YLR443W | ECM7    | 0.3111 | -0.0367 |
| YCL018W   | LEU2    | YJR074W | MOG1    | 0.3109 | 0.0003  |
| YIL043C   | CBR1    | YDR144C | MKC7    | 0.3108 | 0.1003  |
| YOR127W   | RGA1    | YFR004W | RPN11   | 0.3106 | 0.1821  |
| YGR209C   | TRX2    | YEL068C | YEL068C | 0.3105 | 0.1189  |
| YER144C   | UBP5    | YJL149W | DAS1    | 0.3104 | 0.0085  |
| YPL226W   | NEW1    | YLR257W | YLR257W | 0.3104 | -0.1501 |
| YCL009C   | ILV6    | YGR288W | MAL13   | 0.3103 | 0.1312  |
| YGR150C   | CCM1    | YJL187C | SWE1    | 0.3102 | 0.0239  |
| YGR157W   | CHO2    | YOL062C | APM4    | 0.3102 | 0.0365  |
| YBL007C   | SLA1    | YBR239C | ERT1    | 0.3101 | 0.0003  |
| YJL212C   | OPT1    | YNL321W | VNX1    | 0.3100 | 0.0923  |
| YLR442C   | SIR3    | YOR033C | EXO1    | 0.3099 | 0.0976  |
| YJL118W   | YJL118W | YOL088C | MPD2    | 0.3098 | -0.1063 |
| YPR022C   | SDD4    | YNL329C | PEX6    | 0.3098 | 0.1060  |
| YFR037C   | RSC8    | YHL007C | STE20   | 0.3097 | 0.0341  |
| YDR383C   | NKP1    | YBL020W | RFT1    | 0.3096 | 0.0331  |
| YJL126W   | NIT2    | YBR061C | TRM7    | 0.3095 | 0.0371  |
| YOR371C   | GPB1    | YFR011C | MIC19   | 0.3095 | -0.0600 |
| YHR115C   | DMA1    | YDR441C | APT2    | 0.3092 | 0.0005  |
| YMR154C   | RIM13   | YBR168W | PEX32   | 0.3091 | 0.0519  |
| YDL227C   | Ho      | YLR443W | ECM7    | 0.3090 | -0.0766 |
| YJL047C   | RTT101  | YOR088W | YOR088W | 0.3090 | -0.1673 |
| YLR368W   | MDM30   | YBR166C | TYR1    | 0.3090 | 0.0140  |

|           |           |         |         |        |         |
|-----------|-----------|---------|---------|--------|---------|
| YDL002C   | NHP10     | YER116C | SLX8    | 0.3088 | 0.1401  |
| YJL149W   | DAS1      | YML013W | UBX2    | 0.3088 | 0.0195  |
| YOR054C   | VHS3      | YGR001C | EFM5    | 0.3087 | -0.0456 |
| YGL025C   | PGD1      | YBR069C | TAT1    | 0.3085 | -0.0850 |
| YDR420W   | HKR1      | YBR069C | TAT1    | 0.3084 | -0.1551 |
| YFL016C   | MDJ1      | YER182W | FMP10   | 0.3084 | 0.0273  |
| YNL041C   | COG6      | YCL024W | KCC4    | 0.3084 | -0.1188 |
| YER022W   | SRB4      | YBR087W | RFC5    | 0.3083 | 0.1008  |
| YBL020W   | RFT1      | YOL018C | TLG2    | 0.3082 | -0.0278 |
| YER049W   | TPA1      | YOL092W | YPQ1    | 0.3080 | 0.4118  |
| YOL088C   | MPD2      | YDR180W | SCC2    | 0.3080 | -0.0298 |
| YLL035W   | GRC3      | YLR287C | YLR287C | 0.3078 | 0.0182  |
| YKR080W   | MTD1      | YGR222W | PET54   | 0.3077 | -0.1102 |
| YLR368W   | MDM30     | YOL018C | TLG2    | 0.3077 | 0.0798  |
| YPL001W   | HAT1      | YML098W | TAF13   | 0.3077 | 0.0630  |
| YGL195W   | GCN1      | YGL207W | SPT16   | 0.3076 | 0.0598  |
| YGL004C   | RPN14     | YHR050W | SMF2    | 0.3074 | -0.0804 |
| YGR150C   | CCM1      | YBR249C | ARO4    | 0.3074 | -0.0107 |
| YNL329C   | PEX6      | YDR420W | HKR1    | 0.3074 | -0.0632 |
| YKR051W   | YKR051W   | YOR092W | ECM3    | 0.3073 | 0.0904  |
| YNL034W   | YNL034W   | YBL089W | AVT5    | 0.3070 | 0.0271  |
| YPL009C   | RQC2      | YKL067W | YNK1    | 0.3070 | -0.0157 |
| YDL150W   | RPC53     | YBL040C | ERD2    | 0.3069 | -0.0661 |
| YOR048C   | RAT1      | YGR012W | MCY1    | 0.3069 | 0.0515  |
| YJL208C   | NUC1      | YMR158W | MRPS8   | 0.3068 | 0.1434  |
| YOR142W   | LSC1      | YBR222C | PCS60   | 0.3068 | 0.0851  |
| YBL030C   | PET9      | YDR513W | GRX2    | 0.3067 | 0.0655  |
| YOR117W   | RPT5      | YOL093W | TRM10   | 0.3067 | -0.0465 |
| YPL183C   | RTT10     | YNR012W | URK1    | 0.3067 | 0.2666  |
| YNL124W   | NAF1      | YGR157W | CHO2    | 0.3066 | -0.1111 |
| YOR043W   | WHI2      | YOL147C | PEX11   | 0.3066 | -0.2263 |
| YML091C   | RPM2      | YFR013W | IOC3    | 0.3065 | 0.0743  |
| YOL092W   | YPQ1      | YLR430W | SEN1    | 0.3065 | 0.1350  |
| YCR083W   | TRX3      | YDR420W | HKR1    | 0.3062 | 0.0904  |
| YMR158W   | MRPS8     | YMR067C | UBX4    | 0.3061 | 0.2671  |
| YCL009C   | ILV6      | YER116C | SLX8    | 0.3060 | -0.1240 |
| YER019W   | ISC1      | YMR115W | MGR3    | 0.3060 | -0.0478 |
| YIL015C-A | YIL015C-A | YOR033C | EXO1    | 0.3059 | -0.0233 |
| YGL176C   | YGL176C   | YKL125W | RRN3    | 0.3055 | 0.0709  |
| YHR016C   | YSC84     | YJL208C | NUC1    | 0.3055 | -0.1941 |
| YDR134C   | YDR134C   | YEL071W | DLD3    | 0.3054 | -0.0987 |
| YML013W   | UBX2      | YLR287C | YLR287C | 0.3053 | -0.0500 |
| YGR209C   | TRX2      | YJR025C | BNA1    | 0.3052 | -0.1683 |
| YGR222W   | PET54     | YML098W | TAF13   | 0.3051 | -0.0418 |
| YNL138W   | SRV2      | YFL018C | LPD1    | 0.3050 | 0.0492  |
| YKR080W   | MTD1      | YDL047W | SIT4    | 0.3047 | -0.0155 |
| YHR023W   | MYO1      | YLR181C | VTA1    | 0.3041 | 0.0363  |

|         |         |           |         |        |         |
|---------|---------|-----------|---------|--------|---------|
| YNL024C | EFM6    | YFL047W   | RGD2    | 0.3041 | -0.0013 |
| YGL053W | PRM8    | YOR131C   | YOR131C | 0.3039 | -0.0164 |
| YIL171W | YIL171W | YPL144W   | POC4    | 0.3037 | -0.1399 |
| YNL326C | PFA3    | YLR046C   | YLR046C | 0.3035 | -0.0936 |
| YML004C | GLO1    | YJR032W   | CPR7    | 0.3033 | -0.2059 |
| YDR528W | HLR1    | YDL164C   | CDC9    | 0.3032 | 0.0831  |
| YPL237W | SUI3    | YBR154C   | RPB5    | 0.3032 | 0.2654  |
| YGL053W | PRM8    | YGL226C-A | OST5    | 0.3031 | 0.0552  |
| YHR104W | GRE3    | YKL067W   | YNK1    | 0.3031 | 0.1987  |
| YBR154C | RPB5    | YBR166C   | TYR1    | 0.3030 | 0.0616  |
| YHR039C | MSC7    | YBR067C   | TIP1    | 0.3030 | -0.0909 |
| YJL047C | RTT101  | YHR043C   | DOG2    | 0.3030 | 0.1806  |
| YDR180W | SCC2    | YIL142W   | CCT2    | 0.3029 | 0.0456  |
| YDR034C | LYS14   | YIL166C   | YIL166C | 0.3028 | 0.0236  |
| YLR046C | YLR046C | YBR137W   | YBR137W | 0.3024 | -0.0556 |
| YDL103C | QRI1    | YDL167C   | NRP1    | 0.3022 | 0.1351  |
| YML110C | COQ5    | YGR194C   | XKS1    | 0.3022 | 0.0762  |
| YGR208W | SER2    | YNL074C   | MLF3    | 0.3021 | 0.0931  |
| YKR051W | YKR051W | YDL217C   | TIM22   | 0.3021 | -0.1325 |
| YNR034W | SOL1    | YER035W   | EDC2    | 0.3021 | 0.0047  |
| YBL030C | PET9    | YML091C   | RPM2    | 0.3020 | 0.1391  |
| YGR012W | MCY1    | YEL056W   | HAT2    | 0.3018 | 0.0003  |
| YLR172C | DPH5    | YIR026C   | YVH1    | 0.3018 | 0.1282  |
| YGR158C | MTR3    | YGR157W   | CHO2    | 0.3017 | 0.1631  |
| YPL226W | NEW1    | YGL051W   | MST27   | 0.3015 | 0.2353  |
| YDR528W | HLR1    | YIL066C   | RNR3    | 0.3014 | 0.0278  |
| YGR288W | MAL13   | YER185W   | PUG1    | 0.3014 | 0.1029  |
| YJL051W | IRC8    | YLR180W   | SAM1    | 0.3014 | -0.0407 |
| YDL097C | RPN6    | YMR067C   | UBX4    | 0.3012 | 0.0838  |
| YDR064W | RPS13   | YOR103C   | OST2    | 0.3012 | 0.0618  |
| YGR149W | GPC1    | YDR178W   | SDH4    | 0.3012 | 0.1413  |
| YIL112W | HOS4    | YDR383C   | NKP1    | 0.3012 | 0.0367  |
| YOR142W | LSC1    | YDL155W   | CLB3    | 0.3010 | -0.0090 |
| YDL089W | NUR1    | YPL058C   | PDR12   | 0.3007 | 0.1274  |
| YER186C | YER186C | YNL280C   | ERG24   | 0.3007 | -0.0585 |
| YGR012W | MCY1    | YOR371C   | GPB1    | 0.3007 | 0.1039  |
| YER019W | ISC1    | YDL211C   | YDL211C | 0.3006 | 0.0806  |
| YCR031C | RPS14a  | YDL150W   | RPC53   | 0.3004 | 0.1109  |
| YJR086W | STE18   | YGR157W   | CHO2    | 0.3003 | 0.0825  |
| YOL130W | ALR1    | YLR059C   | REX2    | 0.3002 | 0.2514  |
| YDR144C | MKC7    | YOR101W   | RAS1    | 0.3001 | 0.1031  |
| YBR069C | TAT1    | YLR176C   | RFX1    | 0.3000 | -0.0851 |
| YMR005W | TAF4    | YAL051W   | OAF1    | 0.3000 | -0.0425 |
| YLR342W | FKS1    | YDL002C   | NHP10   | 0.2998 | -0.0482 |
| YDR383C | NKP1    | YIL112W   | HOS4    | 0.2997 | 0.0052  |
| YGL257C | MNT2    | YLR176C   | RFX1    | 0.2996 | -0.0384 |
| YNL041C | COG6    | YLR047C   | FRE8    | 0.2996 | -0.1714 |

|           |         |           |         |        |         |
|-----------|---------|-----------|---------|--------|---------|
| YPL064C   | CWC27   | YDR144C   | MKC7    | 0.2996 | -0.0790 |
| YDR319C   | YFT2    | YER186C   | YER186C | 0.2995 | 0.1203  |
| YLR426W   | TDA5    | YJL030W   | MAD2    | 0.2994 | 0.0919  |
| YML096W   | YML096W | YDR383C   | NKP1    | 0.2994 | -0.1222 |
| YOL088C   | MPD2    | YMR209C   | YMR209C | 0.2993 | 0.0068  |
| YNL215W   | IES2    | YHL007C   | STE20   | 0.2991 | 0.0006  |
| YER020W   | GPA2    | YGR194C   | XKS1    | 0.2989 | 0.0541  |
| YJL051W   | IRC8    | YGL193C   | YGL193C | 0.2989 | 0.0942  |
| YGL242C   | YGL242C | YOL081W   | IRA2    | 0.2988 | -0.0361 |
| YNL022C   | RCM1    | YJL163C   | YJL163C | 0.2987 | -0.4155 |
| YDL150W   | RPC53   | YJL171C   | TOH1    | 0.2986 | -0.1556 |
| YGR012W   | MCY1    | YLR257W   | YLR257W | 0.2986 | -0.0877 |
| YBR067C   | TIP1    | YNL124W   | NAF1    | 0.2985 | 0.1074  |
| YOL073C   | DSC2    | YJR040W   | GEF1    | 0.2985 | 0.0662  |
| YEL076W-C | Unknown | YJL140W   | RPB4    | 0.2979 | 0.0275  |
| YMR209C   | YMR209C | YNR034W   | SOL1    | 0.2979 | 0.0571  |
| YLR248W   | RCK2    | YKR075C   | YKR075C | 0.2978 | -0.1999 |
| YJL187C   | SWE1    | YJL158C   | CIS3    | 0.2977 | 0.1318  |
| YOR103C   | OST2    | YEL076W-C | Unknown | 0.2976 | 0.0719  |
| YMR215W   | GAS3    | YER026C   | CHO1    | 0.2975 | 0.0676  |
| YNL280C   | ERG24   | YMR123W   | PKR1    | 0.2975 | 0.1769  |
| YOL092W   | YPQ1    | YPL058C   | PDR12   | 0.2975 | 0.0042  |
| YDR038C   | ENA5    | YJL051W   | IRC8    | 0.2974 | -0.0552 |
| YOL130W   | ALR1    | YML004C   | GLO1    | 0.2974 | -0.2000 |
| YGR211W   | ZPR1    | YLL035W   | GRC3    | 0.2972 | 0.2082  |
| YIL171W   | YIL171W | YLR052W   | IES3    | 0.2971 | -0.1429 |
| YHR054C   | YHR054C | YLR176C   | RFX1    | 0.2970 | 0.0008  |
| YLR287C   | YLR287C | YLR052W   | IES3    | 0.2969 | 0.0856  |
| YMR115W   | MGR3    | YGL257C   | MNT2    | 0.2967 | 0.0972  |
| YKR080W   | MTD1    | YGR208W   | SER2    | 0.2966 | 0.0842  |
| YOL092W   | YPQ1    | YJR040W   | GEF1    | 0.2966 | 0.0462  |
| YJR086W   | STE18   | YKL073W   | LHS1    | 0.2964 | -0.0376 |
| YNR034W   | SOL1    | YER020W   | GPA2    | 0.2964 | 0.0212  |
| YGL201C   | MCM6    | YJR068W   | RFC2    | 0.2963 | -0.0638 |
| YBR067C   | TIP1    | YNL135C   | FPR1    | 0.2961 | 0.0121  |
| YML036W   | CGI121  | YLR172C   | DPH5    | 0.2960 | 0.0723  |
| YDL171C   | GLT1    | YOR092W   | ECM3    | 0.2959 | 0.0675  |
| YOL147C   | PEX11   | YDR383C   | NKP1    | 0.2959 | -0.0205 |
| YOR264W   | DSE3    | YCL024W   | KCC4    | 0.2959 | 0.2229  |
| YDL103C   | QRI1    | YDL155W   | CLB3    | 0.2958 | 0.0601  |
| YKL116C   | PRR1    | YML098W   | TAF13   | 0.2958 | -0.1891 |
| YDL171C   | GLT1    | YGL226C-A | OST5    | 0.2957 | -0.0502 |
| YGR209C   | TRX2    | YGR150C   | CCM1    | 0.2957 | -0.0627 |
| YDR367W   | KEI1    | YKL184W   | SPE1    | 0.2955 | -0.0009 |
| YOL130W   | ALR1    | YNL200C   | NNR1    | 0.2955 | -0.0451 |
| YFL056C   | AAD6    | YFR037C   | RSC8    | 0.2954 | -0.0632 |
| YGR168C   | YGR168C | YDR178W   | SDH4    | 0.2952 | -0.0921 |

|           |           |           |         |        |         |
|-----------|-----------|-----------|---------|--------|---------|
| YMR154C   | RIM13     | YDL150W   | RPC53   | 0.2952 | -0.1188 |
| YER186C   | YER186C   | YGR258C   | RAD2    | 0.2951 | -0.0863 |
| YBR071W   | YBR071W   | YKR051W   | YKR051W | 0.2950 | -0.0314 |
| YDR420W   | HKR1      | YGR006W   | PRP18   | 0.2949 | -0.0079 |
| YDR481C   | PHO8      | YGL226C-A | OST5    | 0.2949 | -0.0703 |
| YDR528W   | HLR1      | YOL081W   | IRA2    | 0.2949 | -0.1515 |
| YIL133C   | RPL16a    | YNL242W   | ATG2    | 0.2949 | -0.4022 |
| YFR013W   | IOC3      | YGL207W   | SPT16   | 0.2948 | 0.0132  |
| YMR010W   | ANY1      | YGR194C   | XKS1    | 0.2947 | -0.0401 |
| YPL009C   | RQC2      | YLR368W   | MDM30   | 0.2947 | -0.1267 |
| YBR239C   | ERT1      | YOR196C   | LIP5    | 0.2946 | 0.1240  |
| YCL039W   | GID7      | YML048W   | GSF2    | 0.2946 | -0.1001 |
| YML072C   | TCB3      | YMR209C   | YMR209C | 0.2945 | 0.0085  |
| YFL047W   | RGD2      | YJL163C   | YJL163C | 0.2944 | -0.0806 |
| YML016C   | PPZ1      | YDR441C   | APT2    | 0.2941 | -0.0385 |
| YNL278W   | CAF120    | YDR531W   | CAB1    | 0.2940 | -0.0861 |
| YHL007C   | STE20     | YFR037C   | RSC8    | 0.2939 | 0.1542  |
| YIL015C-A | YIL015C-A | YPL071C   | YPL071C | 0.2939 | 0.0390  |
| YPL016W   | SWI1      | YGL226C-A | OST5    | 0.2939 | -0.0813 |
| YJL212C   | OPT1      | YEL058W   | PCM1    | 0.2938 | -0.0787 |
| YNR036C   | MRPS12    | YFL016C   | MDJ1    | 0.2938 | 0.1069  |
| YLR330W   | CHS5      | YEL076W-C | Unknown | 0.2937 | 0.0638  |
| YPL234C   | VMA11     | YDR515W   | SLF1    | 0.2933 | -0.2146 |
| YML013W   | UBX2      | YLR047C   | FRE8    | 0.2931 | 0.1148  |
| YBL017C   | PEP1      | YDR420W   | HKR1    | 0.2930 | 0.1106  |
| YCR041W   | YCR041W   | YFR004W   | RPN11   | 0.2930 | 0.1873  |
| YGL025C   | PGD1      | YJL051W   | IRC8    | 0.2930 | 0.0503  |
| YHR029C   | YHI9      | YKL073W   | LHS1    | 0.2930 | -0.0773 |
| YGR001C   | EFM5      | YPL071C   | YPL071C | 0.2928 | -0.0300 |
| YLR430W   | SEN1      | YOR048C   | RAT1    | 0.2928 | 0.0597  |
| YHR209W   | CRG1      | YOL018C   | TLG2    | 0.2927 | 0.2049  |
| YER019W   | ISC1      | YBR069C   | TAT1    | 0.2925 | 0.1356  |
| YHR039C   | MSC7      | YDL133W   | SRF1    | 0.2925 | -0.0400 |
| YFL016C   | MDJ1      | YGL193C   | YGL193C | 0.2924 | 0.0094  |
| YIL133C   | RPL16a    | YIL158W   | AIM20   | 0.2923 | 0.4198  |
| YOR389W   | YOR389W   | YFR004W   | RPN11   | 0.2923 | -0.0601 |
| YGL242C   | YGL242C   | YGR207C   | CIR1    | 0.2922 | 0.1191  |
| YGL035C   | MIG1      | YOR264W   | DSE3    | 0.2921 | 0.0284  |
| YFL049W   | SWP82     | YDR441C   | APT2    | 0.2918 | -0.0251 |
| YBR061C   | TRM7      | YNL022C   | RCM1    | 0.2917 | 0.2370  |
| YCL026C-A | FRM2      | YPL183C   | RTT10   | 0.2917 | -0.0249 |
| YDR038C   | ENA5      | YLR176C   | RFX1    | 0.2916 | 0.0664  |
| YOR251C   | TUM1      | YLR052W   | IES3    | 0.2916 | -0.0676 |
| YEL064C   | AVT2      | YNL138W   | SRV2    | 0.2915 | -0.0074 |
| YPL058C   | PDR12     | YPL147W   | PXA1    | 0.2914 | -0.0323 |
| YDR339C   | FCF1      | YDL103C   | QRI1    | 0.2913 | 0.2330  |
| YPR015C   | YPR015C   | YOR251C   | TUM1    | 0.2913 | 0.0291  |

|           |         |         |         |        |         |
|-----------|---------|---------|---------|--------|---------|
| YDR531W   | CAB1    | YML110C | COQ5    | 0.2912 | -0.0855 |
| YEL021W   | URA3    | YNL135C | FPR1    | 0.2912 | -0.0404 |
| YNL322C   | KRE1    | YJL149W | DAS1    | 0.2912 | 0.0530  |
| YDR178W   | SDH4    | YDL155W | CLB3    | 0.2910 | -0.1840 |
| YJL204C   | RCY1    | YPL064C | CWC27   | 0.2910 | -0.0317 |
| YJL058C   | BIT61   | YGL169W | SUA5    | 0.2910 | 0.0356  |
| YML091C   | RPM2    | YLR452C | SST2    | 0.2907 | 0.0016  |
| YCL026C-A | FRM2    | YIL165C | YIL165C | 0.2906 | 0.1086  |
| YMR062C   | ARG7    | YLR059C | REX2    | 0.2903 | -0.1154 |
| YEL056W   | HAT2    | YNL329C | PEX6    | 0.2902 | 0.2078  |
| YDR383C   | NKP1    | YHL007C | STE20   | 0.2900 | -0.0717 |
| YHR063C   | PAN5    | YER049W | TPA1    | 0.2900 | 0.0099  |
| YGL226C-A | OST5    | YOR092W | ECM3    | 0.2898 | 0.0295  |
| YBR222C   | PCS60   | YLR052W | IES3    | 0.2897 | -0.1799 |
| YOL062C   | APM4    | YJR040W | GEF1    | 0.2895 | -0.0222 |
| YBL020W   | RFT1    | YNL329C | PEX6    | 0.2894 | -0.0232 |
| YJR108W   | ABM1    | YMR115W | MGR3    | 0.2893 | -0.0485 |
| YDL167C   | NRP1    | YDL111C | RRP42   | 0.2892 | 0.1142  |
| YML016C   | PPZ1    | YOR043W | WHI2    | 0.2892 | 0.0035  |
| YKL110C   | KTI12   | YLR052W | IES3    | 0.2891 | 0.0522  |
| YDL180W   | YDL180W | YML007W | YAP1    | 0.2889 | 0.0616  |
| YHR027C   | RPN1    | YPL226W | NEW1    | 0.2888 | 0.0097  |
| YBR147W   | RTC2    | YLR052W | IES3    | 0.2885 | -0.1936 |
| YDL155W   | CLB3    | YOL088C | MPD2    | 0.2884 | -0.1777 |
| YPL031C   | PHO85   | YGL192W | IME4    | 0.2884 | 0.1786  |
| YIL089W   | YIL089W | YPL001W | HAT1    | 0.2883 | -0.0006 |
| YFR004W   | RPN11   | YBL079W | NUP170  | 0.2881 | 0.0508  |
| YGL017W   | ATE1    | YDL217C | TIM22   | 0.2881 | -0.0504 |
| YDL002C   | NHP10   | YIL133C | RPL16a  | 0.2880 | 0.0474  |
| YKL019W   | RAM2    | YGR023W | MTL1    | 0.2878 | -0.0425 |
| YIL046W   | MET30   | YNL124W | NAF1    | 0.2877 | 0.1482  |
| YOR389W   | YOR389W | YOR264W | DSE3    | 0.2876 | -0.0317 |
| YIL166C   | YIL166C | YBR222C | PCS60   | 0.2875 | 0.0036  |
| YDR481C   | PHO8    | YPL058C | PDR12   | 0.2874 | 0.1293  |
| YOL018C   | TLG2    | YNL329C | PEX6    | 0.2874 | 0.1301  |
| YMR112C   | MED11   | YGL051W | MST27   | 0.2873 | -0.1198 |
| YBR037C   | SCO1    | YLL040C | VPS13   | 0.2871 | -0.2488 |
| YGL017W   | ATE1    | YML048W | GSF2    | 0.2868 | 0.0349  |
| YNL046W   | YNL046W | YIL040W | APQ12   | 0.2867 | 0.0144  |
| YDR339C   | FCF1    | YOL088C | MPD2    | 0.2866 | 0.1910  |
| YEL068C   | YEL068C | YMR005W | TAF4    | 0.2865 | 0.0655  |
| YGR207C   | CIR1    | YDL047W | SIT4    | 0.2864 | -0.1537 |
| YOL081W   | IRA2    | YGL017W | ATE1    | 0.2864 | 0.0612  |
| YGL051W   | MST27   | YIL009W | FAA3    | 0.2863 | -0.0952 |
| YOR051C   | ETT1    | YER022W | SRB4    | 0.2863 | 0.1675  |
| YML007W   | YAP1    | YBR069C | TAT1    | 0.2860 | 0.0556  |
| YBR157C   | ICS2    | YBR067C | TIP1    | 0.2859 | 0.0728  |

|         |         |           |         |        |         |
|---------|---------|-----------|---------|--------|---------|
| YGL051W | MST27   | YKL184W   | SPE1    | 0.2856 | 0.0155  |
| YBL079W | NUP170  | YOR131C   | YOR131C | 0.2855 | -0.1239 |
| YDL116W | NUP84   | YDR420W   | HKR1    | 0.2855 | 0.0375  |
| YJL030W | MAD2    | YOR131C   | YOR131C | 0.2855 | 0.0201  |
| YBR087W | RFC5    | YPL001W   | HAT1    | 0.2854 | 0.1842  |
| YBR163W | EXO5    | YHR115C   | DMA1    | 0.2854 | -0.0207 |
| YJR073C | OPI3    | YOR264W   | DSE3    | 0.2853 | -0.0290 |
| YGR288W | MAL13   | YJL118W   | YJL118W | 0.2852 | -0.2450 |
| YKR051W | YKR051W | YJR086W   | STE18   | 0.2852 | -0.0386 |
| YJL187C | SWE1    | YIL142W   | CCT2    | 0.2851 | 0.0632  |
| YOR054C | VHS3    | YGR258C   | RAD2    | 0.2851 | 0.0370  |
| YDL116W | NUP84   | YIL158W   | AIM20   | 0.2850 | 0.0488  |
| YDR530C | APA2    | YPL012W   | RRP12   | 0.2850 | -0.0079 |
| YBR132C | AGP2    | YEL064C   | AVT2    | 0.2848 | 0.0229  |
| YMR005W | TAF4    | YMR152W   | YIM1    | 0.2848 | 0.0891  |
| YKR085C | MRPL20  | YLR442C   | SIR3    | 0.2847 | 0.1693  |
| YLR258W | GSY2    | YKR051W   | YKR051W | 0.2847 | 0.2988  |
| YOL113W | SKM1    | YPR080W   | TEF1    | 0.2847 | 0.0242  |
| YJR008W | MHO1    | YGR149W   | GPC1    | 0.2846 | 0.0159  |
| YLR442C | SIR3    | YFR047C   | BNA6    | 0.2846 | -0.0234 |
| YJL154C | VPS35   | YEL056W   | HAT2    | 0.2844 | 0.0425  |
| YBR132C | AGP2    | YMR209C   | YMR209C | 0.2843 | 0.0717  |
| YCR031C | RPS14a  | YKR085C   | MRPL20  | 0.2843 | 0.1252  |
| YDR034C | LYS14   | YOL026C   | MIM1    | 0.2841 | -0.1567 |
| YML079W | YML079W | YOL026C   | MIM1    | 0.2841 | 0.0034  |
| YOR103C | OST2    | YIR022W   | SEC11   | 0.2840 | 0.0682  |
| YGL176C | YGL176C | YBL014C   | RRN6    | 0.2839 | 0.0842  |
| YLR056W | ERG3    | YJL204C   | RCY1    | 0.2839 | -0.1997 |
| YOL094C | RFC4    | YDL111C   | RRP42   | 0.2839 | 0.1490  |
| YHR115C | DMA1    | YER144C   | UBP5    | 0.2838 | 0.0596  |
| YKL160W | ELF1    | YJR074W   | MOG1    | 0.2838 | 0.0026  |
| YDR367W | KEI1    | YJL047C   | RTT101  | 0.2837 | -0.0564 |
| YLR064W | PER33   | YJR025C   | BNA1    | 0.2837 | -0.0015 |
| YFR013W | IOC3    | YER022W   | SRB4    | 0.2834 | 0.0117  |
| YJL118W | YJL118W | YFR013W   | IOC3    | 0.2834 | -0.1059 |
| YEL064C | AVT2    | YDL116W   | NUP84   | 0.2833 | -0.0385 |
| YNL321W | VNX1    | YMR158W   | MRPS8   | 0.2833 | 0.0336  |
| YER046W | SPO73   | YBR168W   | PEX32   | 0.2832 | 0.0598  |
| YER182W | FMP10   | YJL208C   | NUC1    | 0.2832 | 0.0324  |
| YGR289C | MAL11   | YBR239C   | ERT1    | 0.2832 | 0.2455  |
| YLR176C | RFX1    | YML013W   | UBX2    | 0.2830 | 0.0140  |
| YGL207W | SPT16   | YLR430W   | SEN1    | 0.2828 | 0.1004  |
| YPL009C | RQC2    | YLR430W   | SEN1    | 0.2828 | 0.0213  |
| YBR249C | ARO4    | YKL184W   | SPE1    | 0.2824 | 0.1685  |
| YHR027C | RPN1    | YGL226C-A | OST5    | 0.2822 | 0.0771  |
| YHR209W | CRG1    | YLL040C   | VPS13   | 0.2822 | 0.0113  |
| YOR080W | DIA2    | YDL133W   | SRF1    | 0.2817 | 0.0051  |



|         |         |         |         |        |         |
|---------|---------|---------|---------|--------|---------|
| YNL035C | YNL035C | YDR319C | YFT2    | 0.2816 | -0.0072 |
| YJL126W | NIT2    | YLR258W | GSY2    | 0.2813 | -0.0715 |
| YJL047C | RTT101  | YPL001W | HAT1    | 0.2813 | 0.2472  |
| YER046W | SPO73   | YDL171C | GLT1    | 0.2810 | 0.0613  |
| YDL002C | NHP10   | YKL073W | LHS1    | 0.2807 | -0.0152 |
| YER037W | PHM8    | YKL096W | CWP1    | 0.2806 | 0.0376  |
| YLR057W | MNL2    | YOR092W | ECM3    | 0.2804 | 0.2001  |
| YML098W | TAF13   | YOL026C | MIM1    | 0.2804 | 0.2091  |
| YJL187C | SWE1    | YNL329C | PEX6    | 0.2803 | 0.0610  |
| YMR123W | PKR1    | YLR180W | SAM1    | 0.2801 | 0.1447  |
| YGL176C | YGL176C | YFL016C | MDJ1    | 0.2800 | -0.0472 |
| YGR001C | EFM5    | YPL144W | POC4    | 0.2798 | 0.0786  |
| YJL178C | ATG27   | YOR251C | TUM1    | 0.2797 | 0.2753  |
| YOR127W | RGA1    | YDR134C | YDR134C | 0.2797 | -0.0127 |
| YLR426W | TDA5    | YHR115C | DMA1    | 0.2796 | 0.0007  |
| YNL034W | YNL034W | YJL149W | DAS1    | 0.2795 | 0.0710  |
| YNL135C | FPR1    | YMR209C | YMR209C | 0.2794 | -0.1608 |
| YJR025C | BNA1    | YHR054C | YHR054C | 0.2793 | 0.1940  |
| YFL018C | LPD1    | YLL040C | VPS13   | 0.2791 | 0.0219  |
| YMR192W | GYL1    | YBR161W | CSH1    | 0.2790 | -0.0130 |
| YIL111W | COX5b   | YJL212C | OPT1    | 0.2786 | 0.0735  |
| YBR166C | TYR1    | YPL001W | HAT1    | 0.2784 | 0.0639  |
| YER037W | PHM8    | YOR048C | RAT1    | 0.2783 | -0.0564 |
| YPR080W | TEF1    | YDL211C | YDL211C | 0.2783 | 0.0024  |
| YLR181C | VTA1    | YMR067C | UBX4    | 0.2782 | -0.0888 |
| YNR012W | URK1    | YBR077C | SLM4    | 0.2781 | -0.0874 |
| YDL047W | SIT4    | YGR152C | RSR1    | 0.2779 | 0.0629  |
| YDR351W | SBE2    | YBR008C | FLR1    | 0.2779 | 0.0389  |
| YLR155C | ASP3-1  | YJL047C | RTT101  | 0.2778 | 0.0756  |
| YDL002C | NHP10   | YIL043C | CBR1    | 0.2777 | 0.1277  |
| YLR248W | RCK2    | YJR097W | JJJ3    | 0.2777 | -0.1979 |
| YOR048C | RAT1    | YKL183W | LOT5    | 0.2776 | 0.2834  |
| YIL112W | HOS4    | YHR050W | SMF2    | 0.2775 | -0.0639 |
| YBR168W | PEX32   | YNL074C | MLF3    | 0.2774 | -0.0591 |
| YDL211C | YDL211C | YER186C | YER186C | 0.2772 | -0.1290 |
| YJR056C | YJR056C | YJL140W | RPB4    | 0.2771 | 0.0567  |
| YGL195W | GCN1    | YOL147C | PEX11   | 0.2769 | -0.3098 |
| YLR452C | SST2    | YDL171C | GLT1    | 0.2769 | 0.0704  |
| YDR524C | AGE1    | YDR441C | APT2    | 0.2768 | 0.0972  |
| YJR097W | JJJ3    | YML036W | CGI121  | 0.2767 | 0.2021  |
| YJL217W | REE1    | YPL001W | HAT1    | 0.2766 | -0.1163 |
| YLR057W | MNL2    | YGL035C | MIG1    | 0.2766 | 0.0287  |
| YBR193C | MED8    | YDL133W | SRF1    | 0.2765 | -0.0667 |
| YLR231C | BNA5    | YDR420W | HKR1    | 0.2764 | 0.0356  |
| YLR464W | YLR464W | YMR046C | YMR046C | 0.2763 | 0.0403  |
| YOR251C | TUM1    | YEL056W | HAT2    | 0.2763 | 0.0138  |
| YDR339C | FCF1    | YNL022C | RCM1    | 0.2761 | 0.0447  |

|           |         |         |         |        |         |
|-----------|---------|---------|---------|--------|---------|
| YLR435W   | TSR2    | YOR144C | ELG1    | 0.2761 | 0.1696  |
| YEL058W   | PCM1    | YDR383C | NKP1    | 0.2760 | -0.0520 |
| YHR115C   | DMA1    | YLR443W | ECM7    | 0.2759 | 0.0694  |
| YDL155W   | CLB3    | YEL058W | PCM1    | 0.2755 | -0.0191 |
| YEL056W   | HAT2    | YGR006W | PRP18   | 0.2752 | 0.0936  |
| YGR289C   | MAL11   | YDR515W | SLF1    | 0.2752 | 0.1030  |
| YHR023W   | MYO1    | YNR036C | MRPS12  | 0.2752 | -0.0524 |
| YLL028W   | TPO1    | YBR161W | CSH1    | 0.2751 | 0.0345  |
| YLR452C   | SST2    | YHR023W | MYO1    | 0.2750 | 0.0752  |
| YFR011C   | MIC19   | YDL171C | GLT1    | 0.2747 | -0.1563 |
| YGR258C   | RAD2    | YHR023W | MYO1    | 0.2747 | 0.0204  |
| YCR041W   | YCR041W | YBL017C | PEP1    | 0.2746 | -0.0139 |
| YOR131C   | YOR131C | YML110C | COQ5    | 0.2746 | -0.0280 |
| YDR134C   | YDR134C | YGR012W | MCY1    | 0.2745 | -0.0244 |
| YLR231C   | BNA5    | YBR274W | CHK1    | 0.2744 | -0.0490 |
| YCL009C   | ILV6    | YDR319C | YFT2    | 0.2743 | 0.1287  |
| YIL089W   | YIL089W | YOL026C | MIM1    | 0.2742 | -0.0665 |
| YLL028W   | TPO1    | YPL144W | POC4    | 0.2741 | 0.1499  |
| YGL017W   | ATE1    | YPL001W | HAT1    | 0.2739 | -0.0813 |
| YEL076W-C | Unknown | YOL147C | PEX11   | 0.2738 | 0.0196  |
| YGL025C   | PGD1    | YER035W | EDC2    | 0.2736 | 0.0132  |
| YKL184W   | SPE1    | YLR059C | REX2    | 0.2736 | -0.1901 |
| YNL034W   | YNL034W | YDL150W | RPC53   | 0.2736 | 0.0260  |
| YLR064W   | PER33   | YDR441C | APT2    | 0.2735 | 0.1580  |
| YGR211W   | ZPR1    | YBR147W | RTC2    | 0.2734 | -0.1753 |
| YJL218W   | YJL218W | YCL009C | ILV6    | 0.2733 | -0.0120 |
| YCR041W   | YCR041W | YLR368W | MDM30   | 0.2732 | -0.0201 |
| YJL030W   | MAD2    | YOR051C | ETT1    | 0.2732 | 0.0896  |
| YHR050W   | SMF2    | YGL017W | ATE1    | 0.2731 | -0.1784 |
| YBR161W   | CSH1    | YOR092W | ECM3    | 0.2730 | 0.0133  |
| YBR161W   | CSH1    | YDR367W | KEI1    | 0.2729 | 0.1690  |
| YDR058C   | TGL2    | YOL062C | APM4    | 0.2728 | -0.0739 |
| YER022W   | SRB4    | YPL001W | HAT1    | 0.2728 | 0.0571  |
| YHL007C   | STE20   | YNL215W | IES2    | 0.2726 | 0.2757  |
| YNR036C   | MRPS12  | YNL135C | FPR1    | 0.2726 | 0.1871  |
| YER186C   | YER186C | YGL051W | MST27   | 0.2725 | 0.0115  |
| YGL193C   | YGL193C | YJL047C | RTT101  | 0.2724 | -0.0422 |
| YBR249C   | ARO4    | YIL165C | YIL165C | 0.2723 | 0.0053  |
| YPL237W   | SUI3    | YJR074W | MOG1    | 0.2722 | 0.3362  |
| YCL024W   | KCC4    | YOR251C | TUM1    | 0.2720 | -0.0913 |
| YER144C   | UBP5    | YJL158C | CIS3    | 0.2720 | 0.1169  |
| YLR231C   | BNA5    | YER019W | ISC1    | 0.2720 | -0.0154 |
| YLR443W   | ECM7    | YJR036C | HUL4    | 0.2720 | 0.1420  |
| YIL040W   | APQ12   | YGR157W | CHO2    | 0.2718 | -0.0298 |
| YJL154C   | VPS35   | YHR016C | YSC84   | 0.2717 | 0.0002  |
| YJR008W   | MHO1    | YLL061W | MMP1    | 0.2714 | -0.1022 |
| YPR015C   | YPR015C | YOL062C | APM4    | 0.2714 | -0.0907 |

|           |         |         |         |        |         |
|-----------|---------|---------|---------|--------|---------|
| YFR011C   | MIC19   | YEL071W | DLD3    | 0.2712 | -0.0640 |
| YNL322C   | KRE1    | YJR074W | MOG1    | 0.2712 | -0.0821 |
| YIL040W   | APQ12   | YDL047W | SIT4    | 0.2709 | 0.1259  |
| YHL048W   | COS8    | YML048W | GSF2    | 0.2708 | -0.0968 |
| YBL040C   | ERD2    | YGR150C | CCM1    | 0.2707 | -0.0358 |
| YJL036W   | SNX4    | YML079W | YML079W | 0.2706 | 0.0206  |
| YCL018W   | LEU2    | YDL167C | NRP1    | 0.2701 | -0.0069 |
| YDR441C   | APT2    | YIL009W | FAA3    | 0.2701 | 0.0264  |
| YGR158C   | MTR3    | YER088C | DOT6    | 0.2701 | -0.0027 |
| YJL154C   | VPS35   | YBR274W | CHK1    | 0.2701 | -0.0376 |
| YNL041C   | COG6    | YBR196C | PGI1    | 0.2701 | 0.0335  |
| YGL051W   | MST27   | YHL007C | STE20   | 0.2700 | 0.0498  |
| YKL092C   | BUD2    | YJR032W | CPR7    | 0.2700 | 0.1348  |
| YBR229C   | ROT2    | YLR059C | REX2    | 0.2698 | 0.0067  |
| YIL171W   | YIL171W | YBR069C | TAT1    | 0.2696 | -0.0678 |
| YBL017C   | PEP1    | YER182W | FMP10   | 0.2695 | -0.1055 |
| YBR229C   | ROT2    | YNL321W | VNX1    | 0.2695 | 0.0596  |
| YBR196C   | PGI1    | YPL064C | CWC27   | 0.2694 | -0.0001 |
| YPL009C   | RQC2    | YLR442C | SIR3    | 0.2694 | -0.0114 |
| YJR025C   | BNA1    | YBR196C | PGI1    | 0.2692 | 0.1157  |
| YLL040C   | VPS13   | YBR037C | SCO1    | 0.2692 | -0.0413 |
| YOR251C   | TUM1    | YHR063C | PAN5    | 0.2692 | 0.0833  |
| YOL018C   | TLG2    | YGR150C | CCM1    | 0.2690 | 0.1214  |
| YJR103W   | URA8    | YDR367W | KEI1    | 0.2689 | 0.1236  |
| YML038C   | YMD8    | YFL018C | LPD1    | 0.2689 | -0.1068 |
| YML048W   | GSF2    | YMR115W | MGR3    | 0.2687 | 0.1038  |
| YML007W   | YAP1    | YJL036W | SNX4    | 0.2687 | 0.0974  |
| YJL187C   | SWE1    | YFR004W | RPN11   | 0.2686 | -0.2013 |
| YEL020W-A | TIM9    | YLL035W | GRC3    | 0.2685 | -0.1953 |
| YER144C   | UBP5    | YMR123W | PKR1    | 0.2684 | -0.1304 |
| YGL035C   | MIG1    | YGR023W | MTL1    | 0.2682 | 0.0162  |
| YML013W   | UBX2    | YML038C | YMD8    | 0.2681 | 0.0992  |
| YOR088W   | YOR088W | YNR034W | SOL1    | 0.2680 | 0.0478  |
| YFL018C   | LPD1    | YKL125W | RRN3    | 0.2679 | -0.0132 |
| YOL026C   | MIM1    | YDL211C | YDL211C | 0.2679 | -0.0949 |
| YBR168W   | PEX32   | YJL036W | SNX4    | 0.2678 | 0.1349  |
| YGL017W   | ATE1    | YPL031C | PHO85   | 0.2678 | -0.1021 |
| YKL125W   | RRN3    | YJL218W | YJL218W | 0.2678 | 0.0651  |
| YOR088W   | YOR088W | YBR168W | PEX32   | 0.2678 | 0.0581  |
| YGL017W   | ATE1    | YOR033C | EXO1    | 0.2677 | 0.0161  |
| YOL088C   | MPD2    | YKL073W | LHS1    | 0.2677 | 0.0148  |
| YDR034C   | LYS14   | YLR368W | MDM30   | 0.2676 | 0.2103  |
| YER116C   | SLX8    | YDL002C | NHP10   | 0.2674 | 0.0070  |
| YIL112W   | HOS4    | YNL041C | COG6    | 0.2671 | 0.1904  |
| YNL074C   | MLF3    | YBL020W | RFT1    | 0.2669 | -0.1261 |
| YJL030W   | MAD2    | YGR184C | UBR1    | 0.2668 | -0.0575 |
| YER144C   | UBP5    | YNL329C | PEX6    | 0.2666 | 0.1295  |

|           |         |         |         |        |         |
|-----------|---------|---------|---------|--------|---------|
| YOL026C   | MIM1    | YDR420W | HKR1    | 0.2666 | -0.2513 |
| YDL135C   | RDI1    | YLR057W | MNL2    | 0.2664 | -0.0832 |
| YGR023W   | MTL1    | YGL017W | ATE1    | 0.2664 | 0.0638  |
| YJL118W   | YJL118W | YER022W | SRB4    | 0.2664 | -0.0174 |
| YKL184W   | SPE1    | YLL061W | MMP1    | 0.2664 | 0.0254  |
| YDL155W   | CLB3    | YNR036C | MRPS12  | 0.2663 | -0.0234 |
| YPL144W   | POC4    | YIL066C | RNR3    | 0.2663 | -0.1265 |
| YLR059C   | REX2    | YDR530C | APA2    | 0.2662 | -0.0667 |
| YOR043W   | WHI2    | YJL212C | OPT1    | 0.2662 | 0.0330  |
| YNL046W   | YNL046W | YOL164W | BDS1    | 0.2661 | 0.1835  |
| YLR231C   | BNA5    | YPL058C | PDR12   | 0.2660 | 0.1390  |
| YJL204C   | RCY1    | YJL118W | YJL118W | 0.2659 | -0.0364 |
| YJL183W   | MNN11   | YMR123W | PKR1    | 0.2659 | 0.0493  |
| YGL226W   | MTC3    | YBR196C | PGI1    | 0.2658 | -0.0992 |
| YGR168C   | YGR168C | YER116C | SLX8    | 0.2656 | 0.0453  |
| YGR209C   | TRX2    | YOL026C | MIM1    | 0.2656 | 0.0643  |
| YOL062C   | APM4    | YGR001C | EFM5    | 0.2651 | -0.1828 |
| YJL178C   | ATG27   | YFR013W | IOC3    | 0.2650 | -0.0851 |
| YFR011C   | MIC19   | YER026C | CHO1    | 0.2649 | 0.1627  |
| YIL089W   | YIL089W | YGL169W | SUA5    | 0.2647 | -0.0368 |
| YDR441C   | APT2    | YDL002C | NHP10   | 0.2646 | 0.0499  |
| YER046W   | SPO73   | YEL068C | YEL068C | 0.2645 | 0.0620  |
| YLR180W   | SAM1    | YLL024C | SSA2    | 0.2645 | 0.0944  |
| YOL088C   | MPD2    | YJL208C | NUC1    | 0.2645 | -0.0137 |
| YFR047C   | BNA6    | YJL187C | SWE1    | 0.2644 | -0.0859 |
| YJL171C   | TOH1    | YJL149W | DAS1    | 0.2641 | 0.1363  |
| YFR047C   | BNA6    | YHL048W | COS8    | 0.2640 | 0.1801  |
| YJL140W   | RPB4    | YHR034C | PIH1    | 0.2640 | -0.0153 |
| YOR051C   | ETT1    | YJL051W | IRC8    | 0.2640 | -0.0373 |
| YER182W   | FMP10   | YBR222C | PCS60   | 0.2639 | -0.0667 |
| YJL187C   | SWE1    | YLR426W | TDA5    | 0.2639 | -0.1678 |
| YGL242C   | YGL242C | YJL036W | SNX4    | 0.2638 | 0.0751  |
| YDR531W   | CAB1    | YDR481C | PHO8    | 0.2636 | 0.1019  |
| YML016C   | PPZ1    | YJL140W | RPB4    | 0.2636 | -0.0791 |
| YGL226C-A | OST5    | YHR054C | YHR054C | 0.2635 | 0.0439  |
| YLR237W   | THI7    | YJL047C | RTT101  | 0.2634 | -0.0298 |
| YCL009C   | ILV6    | YBR161W | CSH1    | 0.2631 | -0.1080 |
| YGR194C   | XKS1    | YER020W | GPA2    | 0.2630 | 0.2898  |
| YFR011C   | MIC19   | YJL030W | MAD2    | 0.2629 | 0.1057  |
| YBR069C   | TAT1    | YJR008W | MHO1    | 0.2628 | -0.0310 |
| YDL171C   | GLT1    | YER046W | SPO73   | 0.2628 | 0.0102  |
| YML016C   | PPZ1    | YKL092C | BUD2    | 0.2628 | -0.0376 |
| YGR194C   | XKS1    | YLR258W | GSY2    | 0.2626 | 0.0997  |
| YNR034W   | SOL1    | YLR046C | YLR046C | 0.2626 | 0.0143  |
| YBR077C   | SLM4    | YAL009W | SPO7    | 0.2625 | 0.0773  |
| YDL103C   | QRI1    | YNL138W | SRV2    | 0.2625 | 0.1109  |
| YCR041W   | YCR041W | YIL119C | RPI1    | 0.2624 | -0.0470 |

|           |         |           |         |        |         |
|-----------|---------|-----------|---------|--------|---------|
| YMR005W   | TAF4    | YCR083W   | TRX3    | 0.2624 | 0.0201  |
| YLL038C   | ENT4    | YJL036W   | SNX4    | 0.2623 | -0.0209 |
| YLL061W   | MMP1    | YDL002C   | NHP10   | 0.2622 | -0.2410 |
| YPL234C   | VMA11   | YJL051W   | IRC8    | 0.2622 | 0.1351  |
| YBR222C   | PCS60   | YLR430W   | SEN1    | 0.2620 | 0.1323  |
| YLR430W   | SEN1    | YNL124W   | NAF1    | 0.2618 | 0.0448  |
| YER116C   | SLX8    | YOL088C   | MPD2    | 0.2617 | 0.0788  |
| YEL020W-A | TIM9    | YJL149W   | DAS1    | 0.2616 | -0.0667 |
| YMR154C   | RIM13   | YJL158C   | CIS3    | 0.2612 | 0.0321  |
| YHR209W   | CRG1    | YFL016C   | MDJ1    | 0.2611 | 0.1498  |
| YHR209W   | CRG1    | YLR059C   | REX2    | 0.2610 | -0.0013 |
| YNR034W   | SOL1    | YNL135C   | FPR1    | 0.2610 | 0.0229  |
| YAL056W   | GPB2    | YNL321W   | VNX1    | 0.2609 | 0.0148  |
| YEL020W-A | TIM9    | YOL089C   | HAL9    | 0.2609 | -0.0508 |
| YKL183W   | LOT5    | YPL058C   | PDR12   | 0.2609 | 0.1847  |
| YML048W   | GSF2    | YDR367W   | KEI1    | 0.2609 | 0.0005  |
| YDL047W   | SIT4    | YLR443W   | ECM7    | 0.2608 | -0.0473 |
| YPL064C   | CWC27   | YJL126W   | NIT2    | 0.2608 | 0.1519  |
| YPL058C   | PDR12   | YDR481C   | PHO8    | 0.2608 | 0.0001  |
| YJL171C   | TOH1    | YKL073W   | LHS1    | 0.2607 | 0.0048  |
| YLL038C   | ENT4    | YLR443W   | ECM7    | 0.2607 | 0.0899  |
| YEL076W-C | Unknown | YMR123W   | PKR1    | 0.2602 | -0.0564 |
| YFR013W   | IOC3    | YPL001W   | HAT1    | 0.2602 | 0.0064  |
| YJL204C   | RCY1    | YGR168C   | YGR168C | 0.2602 | 0.0005  |
| YIL166C   | YIL166C | YGL035C   | MIG1    | 0.2601 | -0.0038 |
| YOR142W   | LSC1    | YER026C   | CHO1    | 0.2601 | 0.0058  |
| YML121W   | GTR1    | YGL226C-A | OST5    | 0.2600 | -0.1353 |
| YBR196C   | PGI1    | YLR257W   | YLR257W | 0.2599 | -0.0649 |
| YGL176C   | YGL176C | YPL058C   | PDR12   | 0.2599 | -0.0930 |
| YBL014C   | RRN6    | YER026C   | CHO1    | 0.2598 | -0.0875 |
| YDL097C   | RPN6    | YDL164C   | CDC9    | 0.2598 | 0.0566  |
| YML098W   | TAF13   | YML079W   | YML079W | 0.2598 | 0.0184  |
| YBL014C   | RRN6    | YGR157W   | CHO2    | 0.2597 | -0.0601 |
| YIL171W   | YIL171W | YLL061W   | MMP1    | 0.2597 | 0.0052  |
| YGL201C   | MCM6    | YGR001C   | EFM5    | 0.2595 | 0.0785  |
| YML096W   | YML096W | YDL103C   | QRI1    | 0.2595 | -0.0983 |
| YNL124W   | NAF1    | YLR430W   | SEN1    | 0.2595 | 0.0215  |
| YNL215W   | IES2    | YBR071W   | YBR071W | 0.2594 | 0.0327  |
| YJL154C   | VPS35   | YNL329C   | PEX6    | 0.2593 | 0.0001  |
| YJR097W   | JJJ3    | YGR258C   | RAD2    | 0.2593 | 0.0568  |
| YJL030W   | MAD2    | YOR371C   | GPB1    | 0.2592 | -0.1060 |
| YML036W   | CGI121  | YML098W   | TAF13   | 0.2591 | 0.1334  |
| YIL111W   | COX5b   | YLR237W   | THI7    | 0.2588 | 0.1056  |
| YML036W   | CGI121  | YBL017C   | PEP1    | 0.2588 | -0.0010 |
| YOR142W   | LSC1    | YDR530C   | APA2    | 0.2588 | 0.1620  |
| YDL103C   | QRI1    | YOL092W   | YPQ1    | 0.2587 | -0.0759 |
| YER046W   | SPO73   | YGL051W   | MST27   | 0.2587 | 0.1516  |

|           |         |         |         |        |         |
|-----------|---------|---------|---------|--------|---------|
| YJL047C   | RTT101  | YDL164C | CDC9    | 0.2587 | -0.0023 |
| YLR342W   | FKS1    | YJR025C | BNA1    | 0.2587 | -0.0486 |
| YLR430W   | SEN1    | YLR096W | KIN2    | 0.2586 | 0.1147  |
| YPR015C   | YPR015C | YDR319C | YFT2    | 0.2586 | 0.0652  |
| YGR184C   | UBR1    | YLR430W | SEN1    | 0.2585 | 0.0353  |
| YBR071W   | YBR071W | YJL187C | SWE1    | 0.2583 | 0.0451  |
| YOL088C   | MPD2    | YKL096W | CWP1    | 0.2583 | 0.0078  |
| YOR051C   | ETT1    | YOR048C | RAT1    | 0.2583 | 0.0471  |
| YOR103C   | OST2    | YLR426W | TDA5    | 0.2582 | 0.1215  |
| YKL021C   | MAK11   | YDR180W | SCC2    | 0.2581 | 0.1474  |
| YHR039C   | MSC7    | YBR069C | TAT1    | 0.2580 | 0.1549  |
| YGL035C   | MIG1    | YDL133W | SRF1    | 0.2578 | -0.0159 |
| YJL218W   | YJL218W | YHR027C | RPN1    | 0.2576 | 0.0226  |
| YER088C   | DOT6    | YJL204C | RCY1    | 0.2575 | 0.0082  |
| YLR368W   | MDM30   | YER046W | SPO73   | 0.2574 | -0.0021 |
| YBL029W   | YBL029W | YBL017C | PEP1    | 0.2573 | 0.0012  |
| YOR196C   | LIP5    | YML098W | TAF13   | 0.2572 | 0.0226  |
| YPL071C   | YPL071C | YJL149W | DAS1    | 0.2572 | -0.0001 |
| YJR088C   | EMC2    | YBR161W | CSH1    | 0.2569 | -0.0303 |
| YLR096W   | KIN2    | YKR051W | YKR051W | 0.2568 | -0.0307 |
| YOR371C   | GPB1    | YBL017C | PEP1    | 0.2568 | 0.0398  |
| YDR383C   | NKP1    | YOL093W | TRM10   | 0.2566 | 0.0198  |
| YDR321W   | ASP1    | YML007W | YAP1    | 0.2564 | -0.0828 |
| YLR059C   | REX2    | YJL208C | NUC1    | 0.2563 | 0.0080  |
| YDR180W   | SCC2    | YDL217C | TIM22   | 0.2562 | 0.1331  |
| YKL116C   | PRR1    | YOR088W | YOR088W | 0.2562 | -0.2225 |
| YNL329C   | PEX6    | YOL092W | YPQ1    | 0.2562 | 0.0453  |
| YDR319C   | YFT2    | YHR023W | MYO1    | 0.2559 | -0.0802 |
| YDR524C   | AGE1    | YLR430W | SEN1    | 0.2559 | -0.1403 |
| YJL218W   | YJL218W | YOR196C | LIP5    | 0.2559 | 0.0111  |
| YDR321W   | ASP1    | YGR222W | PET54   | 0.2558 | -0.0353 |
| YOL153C   | YOL153C | YER150W | SPI1    | 0.2558 | 0.0000  |
| YBR239C   | ERT1    | YFR047C | BNA6    | 0.2557 | 0.0713  |
| YKR051W   | YKR051W | YDR319C | YFT2    | 0.2555 | -0.1164 |
| YJR074W   | MOG1    | YBR168W | PEX32   | 0.2552 | -0.0156 |
| YOR043W   | WHI2    | YOR196C | LIP5    | 0.2552 | 0.0273  |
| YCL026C-A | FRM2    | YDR481C | PHO8    | 0.2551 | 0.0967  |
| YDR367W   | KEI1    | YKL183W | LOT5    | 0.2551 | -0.0042 |
| YLR064W   | PER33   | YJL140W | RPB4    | 0.2549 | 0.0479  |
| YFR047C   | BNA6    | YGL195W | GCN1    | 0.2548 | 0.1090  |
| YDR351W   | SBE2    | YML110C | COQ5    | 0.2545 | -0.0599 |
| YGL226C-A | OST5    | YBR157C | ICS2    | 0.2543 | 0.0689  |
| YLR455W   | PDP3    | YER046W | SPO73   | 0.2543 | 0.0058  |
| YFL049W   | SWP82   | YFL047W | RGD2    | 0.2542 | 0.0230  |
| YHR209W   | CRG1    | YPL001W | HAT1    | 0.2541 | 0.1702  |
| YIL089W   | YIL089W | YBR168W | PEX32   | 0.2541 | 0.0606  |
| YOL094C   | RFC4    | YOL088C | MPD2    | 0.2541 | 0.1667  |

|         |         |         |         |        |         |
|---------|---------|---------|---------|--------|---------|
| YER088C | DOT6    | YLR455W | PDP3    | 0.2540 | 0.0964  |
| YBR087W | RFC5    | YLR237W | THI7    | 0.2537 | -0.1823 |
| YDL111C | RRP42   | YBR137W | YBR137W | 0.2537 | 0.0044  |
| YDL002C | NHP10   | YDL167C | NRP1    | 0.2537 | 0.0605  |
| YJR073C | OPI3    | YGR258C | RAD2    | 0.2537 | -0.1064 |
| YLR443W | ECM7    | YIL166C | YIL166C | 0.2537 | 0.1343  |
| YDL089W | NUR1    | YJL171C | TOH1    | 0.2535 | -0.0024 |
| YJL208C | NUC1    | YFR037C | RSC8    | 0.2535 | 0.1219  |
| YNL200C | NNR1    | YIL112W | HOS4    | 0.2535 | 0.1431  |
| YEL056W | HAT2    | YNL321W | VNX1    | 0.2533 | -0.0433 |
| YHR054C | YHR054C | YJL178C | ATG27   | 0.2533 | 0.0491  |
| YML091C | RPM2    | YCR031C | RPS14a  | 0.2533 | 0.0322  |
| YPL144W | POC4    | YFR004W | RPN11   | 0.2533 | 0.1130  |
| YBR067C | TIP1    | YLR430W | SEN1    | 0.2532 | 0.0106  |
| YEL056W | HAT2    | YER144C | UBP5    | 0.2532 | 0.0910  |
| YLR287C | YLR287C | YDR513W | GRX2    | 0.2532 | -0.0667 |
| YJL171C | TOH1    | YLR237W | THI7    | 0.2531 | -0.0407 |
| YLR452C | SST2    | YBR225W | YBR225W | 0.2530 | 0.0266  |
| YBL020W | RFT1    | YMR046C | YMR046C | 0.2529 | -0.0145 |
| YDL155W | CLB3    | YOL147C | PEX11   | 0.2529 | -0.1016 |
| YFL056C | AAD6    | YLR443W | ECM7    | 0.2529 | 0.0353  |
| YBR137W | YBR137W | YOL130W | ALR1    | 0.2528 | -0.0162 |
| YHR027C | RPN1    | YJL036W | SNX4    | 0.2527 | 0.0512  |
| YJL217W | REE1    | YJL204C | RCY1    | 0.2524 | 0.1074  |
| YJL118W | YJL118W | YOR142W | LSC1    | 0.2524 | -0.0419 |
| YOR080W | DIA2    | YJL163C | YJL163C | 0.2524 | 0.0912  |
| YNL321W | VNX1    | YKR051W | YKR051W | 0.2522 | 0.1287  |
| YOR264W | DSE3    | YDR528W | HLR1    | 0.2520 | -0.0231 |
| YBL029W | YBL029W | YBR239C | ERT1    | 0.2519 | 0.1473  |
| YGL226W | MTC3    | YML007W | YAP1    | 0.2518 | 0.0542  |
| YIL158W | AIM20   | YDL002C | NHP10   | 0.2518 | 0.0278  |
| YCL024W | KCC4    | YGR152C | RSR1    | 0.2516 | 0.0546  |
| YJL187C | SWE1    | YEL068C | YEL068C | 0.2515 | -0.0886 |
| YFL056C | AAD6    | YJL051W | IRC8    | 0.2513 | 0.1172  |
| YGR184C | UBR1    | YOR043W | WHI2    | 0.2513 | -0.0290 |
| YOR264W | DSE3    | YNL329C | PEX6    | 0.2512 | 0.0622  |
| YDR513W | GRX2    | YGR157W | CHO2    | 0.2511 | -0.1115 |
| YLR375W | STP3    | YNL035C | YNL035C | 0.2510 | -0.0420 |
| YDL167C | NRP1    | YER088C | DOT6    | 0.2507 | -0.1005 |
| YJR088C | EMC2    | YBL020W | RFT1    | 0.2507 | -0.0479 |
| YKL116C | PRR1    | YKR080W | MTD1    | 0.2506 | -0.0497 |
| YGR222W | PET54   | YKL067W | YNK1    | 0.2505 | 0.0322  |
| YJR074W | MOG1    | YGR288W | MAL13   | 0.2505 | -0.0517 |
| YDL227C | Ho      | YNR034W | SOL1    | 0.2502 | -0.0062 |
| YGR209C | TRX2    | YNL138W | SRV2    | 0.2502 | 0.0171  |
| YBL040C | ERD2    | YGR001C | EFM5    | 0.2501 | 0.0043  |
| YDL047W | SIT4    | YFR013W | IOC3    | 0.2500 | 0.1675  |

|           |         |         |         |        |         |
|-----------|---------|---------|---------|--------|---------|
| YDR524C   | AGE1    | YOL130W | ALR1    | 0.2499 | 0.0009  |
| YBL040C   | ERD2    | YIL009W | FAA3    | 0.2497 | -0.1203 |
| YBR225W   | YBR225W | YBR037C | SCO1    | 0.2497 | 0.0725  |
| YHR050W   | SMF2    | YIL112W | HOS4    | 0.2495 | -0.0794 |
| YBR077C   | SLM4    | YJL036W | SNX4    | 0.2494 | 0.0952  |
| YBR274W   | CHK1    | YGL208W | SIP2    | 0.2494 | -0.0285 |
| YDL002C   | NHP10   | YLR435W | TSR2    | 0.2493 | 0.0866  |
| YLR248W   | RCK2    | YLL061W | MMP1    | 0.2493 | -0.0454 |
| YKR085C   | MRPL20  | YAR028W | YAR028W | 0.2491 | -0.2246 |
| YNR034W   | SOL1    | YGR157W | CHO2    | 0.2491 | -0.0404 |
| YLR047C   | FRE8    | YGL192W | IME4    | 0.2489 | 0.0561  |
| YML038C   | YMD8    | YML013W | UBX2    | 0.2489 | 0.0384  |
| YDL089W   | NUR1    | YPL144W | POC4    | 0.2488 | -0.0494 |
| YJL217W   | REE1    | YOL026C | MIM1    | 0.2488 | -0.0001 |
| YKL096W   | CWP1    | YBR239C | ERT1    | 0.2484 | -0.1616 |
| YKL067W   | YNK1    | YLR057W | MNL2    | 0.2482 | -0.0898 |
| YPL144W   | POC4    | YLR046C | YLR046C | 0.2481 | 0.0413  |
| YLR257W   | YLR257W | YHR209W | CRG1    | 0.2480 | 0.1287  |
| YOL094C   | RFC4    | YHR054C | YHR054C | 0.2479 | 0.1676  |
| YPR022C   | SDD4    | YHR209W | CRG1    | 0.2478 | -0.0463 |
| YLL040C   | VPS13   | YFL018C | LPD1    | 0.2477 | 0.1246  |
| YPL183C   | RTT10   | YML096W | YML096W | 0.2475 | 0.1389  |
| YBL017C   | PEP1    | YDR351W | SBE2    | 0.2474 | 0.1116  |
| YEL076W-C | Unknown | YOR131C | YOR131C | 0.2474 | -0.0145 |
| YBL017C   | PEP1    | YOL081W | IRA2    | 0.2473 | 0.1297  |
| YLR449W   | FPR4    | YNR012W | URK1    | 0.2473 | 0.2410  |
| YDR497C   | ITR1    | YHR054C | YHR054C | 0.2472 | -0.1012 |
| YLR059C   | REX2    | YHR063C | PAN5    | 0.2472 | -0.0632 |
| YNL135C   | FPR1    | YML079W | YML079W | 0.2471 | 0.0155  |
| YBR037C   | SCO1    | YFL016C | MDJ1    | 0.2470 | 0.0128  |
| YKR052C   | MRS4    | YBR147W | RTC2    | 0.2466 | 0.0001  |
| YMR192W   | GYL1    | YCR083W | TRX3    | 0.2466 | -0.0398 |
| YHR115C   | DMA1    | YOR092W | ECM3    | 0.2465 | -0.1327 |
| YML004C   | GLO1    | YOL088C | MPD2    | 0.2464 | 0.0897  |
| YBR137W   | YBR137W | YOL092W | YPQ1    | 0.2463 | -0.0168 |
| YML048W   | GSF2    | YER026C | CHO1    | 0.2463 | 0.0923  |
| YML098W   | TAF13   | YNL322C | KRE1    | 0.2461 | -0.0019 |
| YDL135C   | RDI1    | YGL051W | MST27   | 0.2460 | 0.0242  |
| YLR206W   | ENT2    | YGR149W | GPC1    | 0.2458 | 0.0082  |
| YMR158W   | MRPS8   | YFR037C | RSC8    | 0.2457 | 0.0086  |
| YBR071W   | YBR071W | YJL204C | RCY1    | 0.2455 | -0.0377 |
| YGL035C   | MIG1    | YKR075C | YKR075C | 0.2451 | 0.0078  |
| YLR046C   | YLR046C | YPL144W | POC4    | 0.2451 | 0.0848  |
| YOR117W   | RPT5    | YER144C | UBP5    | 0.2450 | -0.0135 |
| YER046W   | SPO73   | YGR258C | RAD2    | 0.2449 | 0.1166  |
| YOR142W   | LSC1    | YDL047W | SIT4    | 0.2449 | -0.0521 |
| YPL001W   | HAT1    | YJR056C | YJR056C | 0.2449 | 0.0610  |



|           |         |           |           |        |         |
|-----------|---------|-----------|-----------|--------|---------|
| YDL164C   | CDC9    | YMR215W   | GAS3      | 0.2448 | 0.0874  |
| YGR258C   | RAD2    | YGL207W   | SPT16     | 0.2447 | 0.0423  |
| YER026C   | CHO1    | YPL234C   | VMA11     | 0.2446 | 0.1726  |
| YNL041C   | COG6    | YGL208W   | SIP2      | 0.2443 | -0.0335 |
| YBR161W   | CSH1    | YDR530C   | APA2      | 0.2442 | -0.0920 |
| YGL207W   | SPT16   | YLR248W   | RCK2      | 0.2442 | 0.0626  |
| YEL058W   | PCM1    | YGL035C   | MIG1      | 0.2436 | -0.0136 |
| YDL164C   | CDC9    | YFR037C   | RSC8      | 0.2435 | 0.0766  |
| YOR264W   | DSE3    | YDL047W   | SIT4      | 0.2435 | 0.1100  |
| YDR420W   | HKR1    | YJL204C   | RCY1      | 0.2433 | 0.0974  |
| YJL212C   | OPT1    | YJR086W   | STE18     | 0.2432 | -0.1494 |
| YJR008W   | MHO1    | YKL183W   | LOT5      | 0.2429 | -0.1219 |
| YML013W   | UBX2    | YER023W   | PRO3      | 0.2428 | 0.1087  |
| YLR231C   | BNA5    | YOL088C   | MPD2      | 0.2426 | 0.0001  |
| YDR531W   | CAB1    | YGL176C   | YGL176C   | 0.2425 | -0.1321 |
| YBR154C   | RPB5    | YLL040C   | VPS13     | 0.2424 | -0.0433 |
| YDR367W   | KEI1    | YLR047C   | FRE8      | 0.2423 | 0.0929  |
| YER144C   | UBP5    | YHL007C   | STE20     | 0.2423 | 0.1197  |
| YGL025C   | PGD1    | YKL096W   | CWP1      | 0.2421 | -0.0571 |
| YFR047C   | BNA6    | YLL035W   | GRC3      | 0.2420 | -0.1006 |
| YLR257W   | YLR257W | YOL113W   | SKM1      | 0.2420 | 0.0139  |
| YML016C   | PPZ1    | YDL111C   | RRP42     | 0.2419 | 0.0007  |
| YGL025C   | PGD1    | YOR131C   | YOR131C   | 0.2418 | 0.0554  |
| YIL166C   | YIL166C | YBL030C   | PET9      | 0.2416 | -0.0445 |
| YOL018C   | TLG2    | YFR004W   | RPN11     | 0.2416 | 0.0010  |
| YER182W   | FMP10   | YLR257W   | YLR257W   | 0.2413 | 0.0011  |
| YFR011C   | MIC19   | YGR222W   | PET54     | 0.2413 | 0.0146  |
| YER049W   | TPA1    | YJR056C   | YJR056C   | 0.2411 | 0.2417  |
| YGL017W   | ATE1    | YFL047W   | RGD2      | 0.2411 | 0.0040  |
| YHR023W   | MYO1    | YNL138W   | SRV2      | 0.2410 | 0.0733  |
| YFR037C   | RSC8    | YPL064C   | CWC27     | 0.2408 | 0.1409  |
| YER186C   | YER186C | YOR092W   | ECM3      | 0.2407 | 0.0999  |
| YIL089W   | YIL089W | YGR168C   | YGR168C   | 0.2407 | 0.0850  |
| YLR176C   | RFX1    | YMR123W   | PKR1      | 0.2406 | 0.1018  |
| YDL103C   | QRI1    | YDR339C   | FCF1      | 0.2405 | 0.0750  |
| YLR443W   | ECM7    | YOR131C   | YOR131C   | 0.2404 | -0.0056 |
| YDR058C   | TGL2    | YOR196C   | LIP5      | 0.2403 | 0.1329  |
| YHR027C   | RPN1    | YDR515W   | SLF1      | 0.2403 | 0.1549  |
| YHR043C   | DOG2    | YGR157W   | CHO2      | 0.2399 | 0.0482  |
| YIL171W   | YIL171W | YIL015C-A | YIL015C-A | 0.2399 | 0.1517  |
| YOR142W   | LSC1    | YMR152W   | YIM1      | 0.2399 | 0.0010  |
| YCL026C-A | FRM2    | YKL096W   | CWP1      | 0.2396 | -0.1345 |
| YPL237W   | SUI3    | YJL178C   | ATG27     | 0.2394 | 0.2544  |
| YDR441C   | APT2    | YNL280C   | ERG24     | 0.2392 | -0.1107 |
| YLR443W   | ECM7    | YNL135C   | FPR1      | 0.2392 | -0.0862 |
| YER049W   | TPA1    | YHL007C   | STE20     | 0.2391 | 0.1077  |
| YHL048W   | COS8    | YJR074W   | MOG1      | 0.2391 | -0.0161 |

|         |         |         |         |        |         |
|---------|---------|---------|---------|--------|---------|
| YML098W | TAF13   | YJL118W | YJL118W | 0.2391 | 0.0009  |
| YDR528W | HLR1    | YMR067C | UBX4    | 0.2390 | 0.0161  |
| YKL183W | LOT5    | YHR054C | YHR054C | 0.2390 | 0.0561  |
| YLR443W | ECM7    | YBR077C | SLM4    | 0.2389 | 0.0093  |
| YNL135C | FPR1    | YIL043C | CBR1    | 0.2389 | 0.0282  |
| YDR524C | AGE1    | YDR515W | SLF1    | 0.2384 | 0.0110  |
| YML096W | YML096W | YML048W | GSF2    | 0.2383 | 0.1683  |
| YNL034W | YNL034W | YDR383C | NKP1    | 0.2383 | 0.0073  |
| YER144C | UBP5    | YPL058C | PDR12   | 0.2381 | -0.0883 |
| YMR192W | GYL1    | YDR497C | ITR1    | 0.2379 | -0.0484 |
| YFR013W | IOC3    | YGR209C | TRX2    | 0.2378 | -0.0844 |
| YLR059C | REX2    | YNL329C | PEX6    | 0.2377 | 0.0923  |
| YGR152C | RSR1    | YLR368W | MDM30   | 0.2376 | -0.0828 |
| YML004C | GLO1    | YDL111C | RRP42   | 0.2376 | -0.0002 |
| YMR154C | RIM13   | YHR063C | PAN5    | 0.2376 | -0.0773 |
| YDL111C | RRP42   | YER186C | YER186C | 0.2375 | 0.0620  |
| YDL133W | SRF1    | YOR092W | ECM3    | 0.2372 | 0.0623  |
| YIL171W | YIL171W | YLR258W | GSY2    | 0.2372 | 0.0447  |
| YGL004C | RPN14   | YGR288W | MAL13   | 0.2371 | 0.0045  |
| YIL089W | YIL089W | YBR069C | TAT1    | 0.2371 | 0.0268  |
| YDR034C | LYS14   | YIL112W | HOS4    | 0.2369 | 0.0365  |
| YPL237W | SUI3    | YJR088C | EMC2    | 0.2369 | 0.2484  |
| YJL058C | BIT61   | YGR289C | MAL11   | 0.2367 | 0.0296  |
| YBL014C | RRN6    | YLR342W | FKS1    | 0.2366 | -0.0218 |
| YKL110C | KTI12   | YDR524C | AGE1    | 0.2365 | 0.0352  |
| YER026C | CHO1    | YFR011C | MIC19   | 0.2363 | 0.0666  |
| YJR032W | CPR7    | YMR152W | YIM1    | 0.2363 | -0.0660 |
| YKL021C | MAK11   | YDL089W | NUR1    | 0.2363 | -0.1216 |
| YKR052C | MRS4    | YMR067C | UBX4    | 0.2362 | -0.0206 |
| YBR229C | ROT2    | YOR088W | YOR088W | 0.2361 | 0.1519  |
| YIL133C | RPL16a  | YGR211W | ZPR1    | 0.2361 | 0.2123  |
| YDL089W | NUR1    | YBR239C | ERT1    | 0.2359 | 0.1838  |
| YBR008C | FLR1    | YJL204C | RCY1    | 0.2354 | -0.0772 |
| YKL019W | RAM2    | YDR319C | YFT2    | 0.2354 | 0.0472  |
| YOR043W | WHI2    | YMR046C | YMR046C | 0.2351 | -0.0045 |
| YER144C | UBP5    | YBL017C | PEP1    | 0.2350 | 0.0009  |
| YLR172C | DPH5    | YJR073C | OPI3    | 0.2349 | 0.0048  |
| YMR062C | ARG7    | YDR481C | PHO8    | 0.2349 | 0.0898  |
| YBL029W | YBL029W | YGR012W | MCY1    | 0.2348 | 0.0101  |
| YJR068W | RFC2    | YHR034C | PIH1    | 0.2348 | 0.1623  |
| YNL322C | KRE1    | YHR027C | RPN1    | 0.2348 | 0.0371  |
| YOR051C | ETT1    | YOL062C | APM4    | 0.2348 | -0.0437 |
| YBL017C | PEP1    | YGR150C | CCM1    | 0.2347 | 0.0434  |
| YDL171C | GLT1    | YOL088C | MPD2    | 0.2347 | -0.1023 |
| YDR497C | ITR1    | YGR184C | UBR1    | 0.2347 | 0.1065  |
| YBR067C | TIP1    | YJL051W | IRC8    | 0.2346 | -0.0259 |
| YBR161W | CSH1    | YMR046C | YMR046C | 0.2346 | -0.0530 |

|           |           |           |         |        |         |
|-----------|-----------|-----------|---------|--------|---------|
| YKR052C   | MRS4      | YPL001W   | HAT1    | 0.2346 | -0.0830 |
| YLL028W   | TPO1      | YER186C   | YER186C | 0.2345 | 0.1570  |
| YDR481C   | PHO8      | YPL144W   | POC4    | 0.2344 | -0.1330 |
| YDR528W   | HLR1      | YOL088C   | MPD2    | 0.2344 | 0.0424  |
| YGL178W   | MPT5      | YER116C   | SLX8    | 0.2343 | 0.0585  |
| YDR497C   | ITR1      | YLR047C   | FRE8    | 0.2341 | -0.0496 |
| YHR027C   | RPN1      | YMR158W   | MRPS8   | 0.2341 | -0.0255 |
| YLR464W   | YLR464W   | YJL158C   | CIS3    | 0.2340 | -0.0426 |
| YHR115C   | DMA1      | YHR063C   | PAN5    | 0.2338 | -0.0651 |
| YBR071W   | YBR071W   | YGL226C-A | OST5    | 0.2337 | 0.0149  |
| YJL118W   | YJL118W   | YBR157C   | ICS2    | 0.2334 | 0.0185  |
| YOR264W   | DSE3      | YLR258W   | GSY2    | 0.2331 | 0.0562  |
| YER022W   | SRB4      | YKL092C   | BUD2    | 0.2330 | 0.0514  |
| YER023W   | PRO3      | YKL184W   | SPE1    | 0.2328 | 0.0367  |
| YJL204C   | RCY1      | YKL125W   | RRN3    | 0.2327 | -0.0909 |
| YNL326C   | PFA3      | YNL280C   | ERG24   | 0.2325 | 0.0229  |
| YPL237W   | SUI3      | YGL226C-A | OST5    | 0.2325 | 0.1138  |
| YEL056W   | HAT2      | YPL071C   | YPL071C | 0.2324 | 0.0336  |
| YBR071W   | YBR071W   | YDR134C   | YDR134C | 0.2323 | -0.0180 |
| YGL192W   | IME4      | YDR530C   | APA2    | 0.2323 | 0.0432  |
| YHR023W   | MYO1      | YGL226C-A | OST5    | 0.2322 | -0.1238 |
| YIR022W   | SEC11     | YDR134C   | YDR134C | 0.2322 | 0.0191  |
| YGR152C   | RSR1      | YNL321W   | VNX1    | 0.2321 | -0.0289 |
| YNR012W   | URK1      | YAR027W   | UIP3    | 0.2321 | -0.2731 |
| YOR251C   | TUM1      | YBL079W   | NUP170  | 0.2320 | -0.1980 |
| YHL007C   | STE20     | YDR441C   | APT2    | 0.2319 | 0.0443  |
| YOR033C   | EXO1      | YDR351W   | SBE2    | 0.2317 | 0.0864  |
| YGL226C-A | OST5      | YJR036C   | HUL4    | 0.2316 | -0.1307 |
| YJL212C   | OPT1      | YBL017C   | PEP1    | 0.2316 | -0.0324 |
| YOL062C   | APM4      | YJR008W   | MHO1    | 0.2316 | 0.0095  |
| YOR196C   | LIP5      | YAL051W   | OAF1    | 0.2316 | -0.2418 |
| YIL040W   | APQ12     | YGR006W   | PRP18   | 0.2313 | 0.0466  |
| YKR085C   | MRPL20    | YIL066C   | RNR3    | 0.2313 | -0.0541 |
| YJR025C   | BNA1      | YHR029C   | YHI9    | 0.2312 | 0.0198  |
| YBL017C   | PEP1      | YLR368W   | MDM30   | 0.2311 | 0.0027  |
| YDR497C   | ITR1      | YBR168W   | PEX32   | 0.2311 | 0.0835  |
| YNL124W   | NAF1      | YDL150W   | RPC53   | 0.2311 | 0.0416  |
| YOR088W   | YOR088W   | YMR209C   | YMR209C | 0.2310 | 0.1026  |
| YMR010W   | ANY1      | YER186C   | YER186C | 0.2309 | 0.0305  |
| YAR028W   | YAR028W   | YAR027W   | UIP3    | 0.2308 | 0.0141  |
| YML071C   | COG8      | YLR426W   | TDA5    | 0.2308 | -0.1132 |
| YBR157C   | ICS2      | YNR034W   | SOL1    | 0.2307 | -0.0181 |
| YOR389W   | YOR389W   | YBR163W   | EXO5    | 0.2307 | -0.0461 |
| YIL015C-A | YIL015C-A | YMR112C   | MED11   | 0.2306 | 0.0207  |
| YKL184W   | SPE1      | YGL208W   | SIP2    | 0.2301 | -0.0934 |
| YKL067W   | YNK1      | YOR371C   | GPB1    | 0.2301 | -0.0985 |
| YJL208C   | NUC1      | YJR032W   | CPR7    | 0.2300 | 0.0970  |

|           |         |         |         |        |         |
|-----------|---------|---------|---------|--------|---------|
| YLL040C   | VPS13   | YGR184C | UBR1    | 0.2299 | 0.0293  |
| YOR264W   | DSE3    | YKL184W | SPE1    | 0.2297 | -0.1308 |
| YGL242C   | YGL242C | YMR067C | UBX4    | 0.2295 | -0.1599 |
| YDR064W   | RPS13   | YHR054C | YHR054C | 0.2293 | 0.0972  |
| YGR023W   | MTL1    | YJL118W | YJL118W | 0.2292 | -0.0180 |
| YLR452C   | SST2    | YPL226W | NEW1    | 0.2292 | 0.0021  |
| YCL009C   | ILV6    | YFR013W | IOC3    | 0.2290 | -0.0187 |
| YDR319C   | YFT2    | YNL329C | PEX6    | 0.2288 | 0.0152  |
| YOL018C   | TLG2    | YLR257W | YLR257W | 0.2288 | 0.0841  |
| YGL193C   | YGL193C | YNL124W | NAF1    | 0.2287 | -0.1023 |
| YJL140W   | RPB4    | YML038C | YMD8    | 0.2287 | -0.0008 |
| YOL113W   | SKM1    | YGR012W | MCY1    | 0.2286 | 0.0091  |
| YBR157C   | ICS2    | YML048W | GSF2    | 0.2285 | -0.0014 |
| YJL149W   | DAS1    | YAL051W | OAF1    | 0.2285 | 0.0198  |
| YDL150W   | RPC53   | YBR077C | SLM4    | 0.2283 | -0.0563 |
| YKL110C   | KTI12   | YHR050W | SMF2    | 0.2283 | -0.0964 |
| YOR043W   | WHI2    | YBR071W | YBR071W | 0.2283 | -0.1411 |
| YMR209C   | YMR209C | YKR051W | YKR051W | 0.2281 | -0.0846 |
| YBR132C   | AGP2    | YOL026C | MIM1    | 0.2279 | -0.0517 |
| YGL017W   | ATE1    | YER088C | DOT6    | 0.2279 | 0.0238  |
| YJL058C   | BIT61   | YLR046C | YLR046C | 0.2279 | -0.0860 |
| YML091C   | RPM2    | YGR207C | CIR1    | 0.2278 | -0.0472 |
| YGL201C   | MCM6    | YBR071W | YBR071W | 0.2277 | 0.0790  |
| YLL035W   | GRC3    | YGR006W | PRP18   | 0.2275 | 0.0000  |
| YPL001W   | HAT1    | YFR004W | RPN11   | 0.2275 | 0.1808  |
| YMR123W   | PKR1    | YBR168W | PEX32   | 0.2272 | -0.0216 |
| YNL322C   | KRE1    | YKR080W | MTD1    | 0.2272 | -0.0883 |
| YDR528W   | HLR1    | YNL138W | SRV2    | 0.2270 | 0.0889  |
| YIL043C   | CBR1    | YDR319C | YFT2    | 0.2269 | 0.0558  |
| YBR222C   | PCS60   | YDL116W | NUP84   | 0.2267 | -0.1770 |
| YJL217W   | REE1    | YKL067W | YNK1    | 0.2267 | 0.0460  |
| YJR084W   | YJR084W | YLR368W | MDM30   | 0.2267 | -0.0214 |
| YAL051W   | OAF1    | YJL212C | OPT1    | 0.2266 | -0.0331 |
| YNL074C   | MLF3    | YBR239C | ERT1    | 0.2266 | -0.2715 |
| YJR008W   | MHO1    | YOL093W | TRM10   | 0.2265 | -0.0143 |
| YML007W   | YAP1    | YOR092W | ECM3    | 0.2265 | -0.1521 |
| YER116C   | SLX8    | YFL016C | MDJ1    | 0.2263 | -0.1534 |
| YEL076W-C | Unknown | YKL116C | PRR1    | 0.2261 | -0.0270 |
| YKL160W   | ELF1    | YDR134C | YDR134C | 0.2261 | 0.0607  |
| YDR134C   | YDR134C | YHR027C | RPN1    | 0.2260 | 0.0462  |
| YHR054C   | YHR054C | YKL184W | SPE1    | 0.2259 | 0.0891  |
| YJR008W   | MHO1    | YJL187C | SWE1    | 0.2258 | -0.0514 |
| YGR288W   | MAL13   | YLR449W | FPR4    | 0.2257 | -0.1629 |
| YDL103C   | QRI1    | YLR046C | YLR046C | 0.2255 | -0.1130 |
| YDR367W   | KEI1    | YMR112C | MED11   | 0.2253 | 0.0259  |
| YNL329C   | PEX6    | YLR455W | PDP3    | 0.2253 | -0.0123 |
| YOL092W   | YPQ1    | YOR371C | GPB1    | 0.2253 | 0.1347  |

|           |         |           |         |        |         |
|-----------|---------|-----------|---------|--------|---------|
| YPL147W   | PXA1    | YOR092W   | ECM3    | 0.2252 | -0.0221 |
| YNL280C   | ERG24   | YNR034W   | SOL1    | 0.2251 | 0.1963  |
| YKL067W   | YNK1    | YLR258W   | GSY2    | 0.2250 | 0.0338  |
| YPR015C   | YPR015C | YBR239C   | ERT1    | 0.2249 | -0.0530 |
| YJL030W   | MAD2    | YJL158C   | CIS3    | 0.2247 | 0.0364  |
| YKR085C   | MRPL20  | YFL047W   | RGD2    | 0.2247 | 0.0212  |
| YML098W   | TAF13   | YNL321W   | VNX1    | 0.2246 | -0.1095 |
| YHR029C   | YHI9    | YER185W   | PUG1    | 0.2245 | 0.2902  |
| YIL009W   | FAA3    | YDR180W   | SCC2    | 0.2244 | 0.0640  |
| YHL048W   | COS8    | YGL176C   | YGL176C | 0.2243 | -0.0526 |
| YLL040C   | VPS13   | YLR237W   | THI7    | 0.2243 | 0.1025  |
| YML091C   | RPM2    | YPL016W   | SWI1    | 0.2239 | 0.1111  |
| YOR117W   | RPT5    | YBL105C   | PKC1    | 0.2239 | 0.1107  |
| YEL020W-A | TIM9    | YER116C   | SLX8    | 0.2238 | -0.2085 |
| YLR452C   | SST2    | YDR420W   | HKR1    | 0.2238 | -0.0049 |
| YDL116W   | NUP84   | YIL009W   | FAA3    | 0.2237 | 0.1708  |
| YNL041C   | COG6    | YJL047C   | RTT101  | 0.2237 | 0.0908  |
| YGL201C   | MCM6    | YIL112W   | HOS4    | 0.2236 | -0.0387 |
| YJL058C   | BIT61   | YGL226C-A | OST5    | 0.2235 | 0.0054  |
| YLR455W   | PDP3    | YBR225W   | YBR225W | 0.2234 | -0.0071 |
| YGL226W   | MTC3    | YML121W   | GTR1    | 0.2233 | 0.0186  |
| YOR033C   | EXO1    | YOR264W   | DSE3    | 0.2233 | 0.0377  |
| YCL024W   | KCC4    | YOL147C   | PEX11   | 0.2232 | -0.1446 |
| YIL142W   | CCT2    | YDR180W   | SCC2    | 0.2232 | 0.0094  |
| YOR142W   | LSC1    | YDR134C   | YDR134C | 0.2232 | 0.1087  |
| YGL208W   | SIP2    | YOR051C   | ETT1    | 0.2230 | -0.1601 |
| YML121W   | GTR1    | YIL119C   | RPI1    | 0.2228 | 0.1127  |
| YIL089W   | YIL089W | YJL051W   | IRC8    | 0.2227 | -0.0363 |
| YJL217W   | REE1    | YOR088W   | YOR088W | 0.2227 | -0.1220 |
| YMR123W   | PKR1    | YHR209W   | CRG1    | 0.2227 | -0.0885 |
| YPR015C   | YPR015C | YEL071W   | DLD3    | 0.2225 | 0.0386  |
| YIL061C   | SNP1    | YML048W   | GSF2    | 0.2224 | 0.0670  |
| YNL034W   | YNL034W | YIL009W   | FAA3    | 0.2222 | -0.0553 |
| YDR367W   | KEI1    | YLL035W   | GRC3    | 0.2221 | -0.0412 |
| YJR032W   | CPR7    | YKL073W   | LHS1    | 0.2221 | 0.0712  |
| YJR074W   | MOG1    | YNL280C   | ERG24   | 0.2221 | 0.0684  |
| YOL073C   | DSC2    | YCR083W   | TRX3    | 0.2220 | 0.2930  |
| YIL009W   | FAA3    | YDL171C   | GLT1    | 0.2218 | 0.0236  |
| YJR073C   | OPI3    | YML048W   | GSF2    | 0.2218 | 0.0522  |
| YMR067C   | UBX4    | YMR123W   | PKR1    | 0.2218 | 0.0318  |
| YBR157C   | ICS2    | YML091C   | RPM2    | 0.2217 | -0.0199 |
| YLR452C   | SST2    | YFR013W   | IOC3    | 0.2216 | 0.1058  |
| YBR239C   | ERT1    | YOR048C   | RAT1    | 0.2213 | -0.0022 |
| YFR013W   | IOC3    | YKL067W   | YNK1    | 0.2212 | -0.0398 |
| YDR367W   | KEI1    | YGR006W   | PRP18   | 0.2211 | 0.0445  |
| YGR157W   | CHO2    | YJL126W   | NIT2    | 0.2211 | -0.0941 |
| YNL329C   | PEX6    | YOL018C   | TLG2    | 0.2211 | 0.0353  |

|         |         |         |         |        |         |
|---------|---------|---------|---------|--------|---------|
| YBR239C | ERT1    | YJR073C | OPI3    | 0.2210 | 0.0266  |
| YFL047W | RGD2    | YPL064C | CWC27   | 0.2210 | -0.2173 |
| YBR061C | TRM7    | YER049W | TPA1    | 0.2209 | 0.0689  |
| YJR073C | OPI3    | YGR157W | CHO2    | 0.2209 | 0.0191  |
| YEL071W | DLD3    | YOR127W | RGA1    | 0.2207 | 0.2984  |
| YML071C | COG8    | YPL009C | RQC2    | 0.2207 | 0.1541  |
| YGL051W | MST27   | YJL126W | NIT2    | 0.2205 | -0.0994 |
| YOR264W | DSE3    | YBR239C | ERT1    | 0.2205 | -0.0375 |
| YML071C | COG8    | YJL047C | RTT101  | 0.2203 | 0.0095  |
| YNL022C | RCM1    | YML096W | YML096W | 0.2203 | 0.1346  |
| YMR067C | UBX4    | YML096W | YML096W | 0.2202 | 0.0206  |
| YIR022W | SEC11   | YFR047C | BNA6    | 0.2201 | 0.0182  |
| YER185W | PUG1    | YLR237W | THI7    | 0.2200 | 0.0433  |
| YBR126C | TPS1    | YDL171C | GLT1    | 0.2195 | -0.1435 |
| YDL133W | SRF1    | YJL187C | SWE1    | 0.2191 | 0.0394  |
| YLL035W | GRC3    | YJR032W | CPR7    | 0.2191 | 0.0151  |
| YPL234C | VMA11   | YBR121C | GRS1    | 0.2190 | 0.1190  |
| YGL017W | ATE1    | YMR123W | PKR1    | 0.2189 | 0.0406  |
| YDR319C | YFT2    | YDL002C | NHP10   | 0.2188 | 0.0627  |
| YPL144W | POC4    | YGR001C | EFM5    | 0.2188 | 0.0712  |
| YDR481C | PHO8    | YJL171C | TOH1    | 0.2185 | 0.0550  |
| YER186C | YER186C | YDR319C | YFT2    | 0.2184 | 0.0754  |
| YFR004W | RPN11   | YJR068W | RFC2    | 0.2183 | 0.1064  |
| YIL082W | Unknown | YLR047C | FRE8    | 0.2182 | -0.0214 |
| YLR206W | ENT2    | YNL135C | FPR1    | 0.2182 | -0.0332 |
| YFL018C | LPD1    | YMR067C | UBX4    | 0.2181 | -0.1112 |
| YIR028W | DAL4    | YOR101W | RAS1    | 0.2181 | 0.0159  |
| YLR375W | STP3    | YBR071W | YBR071W | 0.2180 | 0.1778  |
| YDL089W | NUR1    | YLR176C | RFX1    | 0.2178 | 0.0430  |
| YDR180W | SCC2    | YIL009W | FAA3    | 0.2176 | 0.1275  |
| YIL171W | YIL171W | YJL212C | OPT1    | 0.2176 | -0.0631 |
| YNR036C | MRPS12  | YFR011C | MIC19   | 0.2175 | 0.0536  |
| YOR371C | GPB1    | YOL093W | TRM10   | 0.2174 | -0.0087 |
| YJR036C | HUL4    | YPL012W | RRP12   | 0.2172 | -0.0182 |
| YMR209C | YMR209C | YML036W | CGI121  | 0.2172 | 0.0160  |
| YOR103C | OST2    | YMR112C | MED11   | 0.2172 | 0.0662  |
| YHR039C | MSC7    | YPL031C | PHO85   | 0.2169 | 0.0015  |
| YJR086W | STE18   | YMR112C | MED11   | 0.2169 | 0.0675  |
| YJR103W | URA8    | YDL167C | NRP1    | 0.2169 | -0.0635 |
| YNL215W | IES2    | YNL329C | PEX6    | 0.2166 | 0.0069  |
| YEL068C | YEL068C | YOL081W | IRA2    | 0.2165 | -0.0341 |
| YDL135C | RDI1    | YDL150W | RPC53   | 0.2164 | 0.0559  |
| YGR150C | CCM1    | YKR080W | MTD1    | 0.2164 | 0.0520  |
| YNL280C | ERG24   | YOL147C | PEX11   | 0.2162 | 0.1216  |
| YLR257W | YLR257W | YER037W | PHM8    | 0.2158 | 0.1193  |
| YFR004W | RPN11   | YOR103C | OST2    | 0.2157 | 0.0254  |
| YFL049W | SWP82   | YIL009W | FAA3    | 0.2156 | 0.1193  |

|         |         |           |         |        |         |
|---------|---------|-----------|---------|--------|---------|
| YOL081W | IRA2    | YDL211C   | YDL211C | 0.2156 | -0.0776 |
| YJR088C | EMC2    | YMR067C   | UBX4    | 0.2155 | -0.0042 |
| YLR096W | KIN2    | YFR047C   | BNA6    | 0.2155 | -0.0270 |
| YNL321W | VNX1    | YGR001C   | EFM5    | 0.2153 | -0.1198 |
| YHL048W | COS8    | YDL133W   | SRF1    | 0.2152 | -0.0888 |
| YKL160W | ELF1    | YOR131C   | YOR131C | 0.2151 | 0.0615  |
| YIL009W | FAA3    | YML036W   | CGI121  | 0.2148 | 0.0685  |
| YOR054C | VHS3    | YBR225W   | YBR225W | 0.2148 | 0.0641  |
| YLR064W | PER33   | YOL073C   | DSC2    | 0.2144 | 0.0124  |
| YNL215W | IES2    | YFR013W   | IOC3    | 0.2144 | -0.1570 |
| YBR067C | TIP1    | YBR087W   | RFC5    | 0.2141 | -0.0237 |
| YKR085C | MRPL20  | YLR443W   | ECM7    | 0.2141 | -0.2074 |
| YOR088W | YOR088W | YKL110C   | KTI12   | 0.2140 | -0.0306 |
| YOL089C | HAL9    | YAR027W   | UIP3    | 0.2138 | 0.0133  |
| YHR023W | MYO1    | YLR452C   | SST2    | 0.2135 | 0.0026  |
| YDL167C | NRP1    | YGR288W   | MAL13   | 0.2132 | -0.0373 |
| YGR149W | GPC1    | YOL097C   | WRS1    | 0.2130 | -0.0244 |
| YLR248W | RCK2    | YDL047W   | SIT4    | 0.2130 | -0.1749 |
| YER185W | PUG1    | YOL147C   | PEX11   | 0.2127 | 0.1074  |
| YLL035W | GRC3    | YDR441C   | APT2    | 0.2127 | 0.0172  |
| YKL183W | LOT5    | YMR209C   | YMR209C | 0.2125 | 0.0002  |
| YOL081W | IRA2    | YGR023W   | MTL1    | 0.2124 | 0.1609  |
| YGR012W | MCY1    | YOR131C   | YOR131C | 0.2123 | -0.1818 |
| YOL018C | TLG2    | YJL047C   | RTT101  | 0.2123 | 0.0033  |
| YER186C | YER186C | YNL041C   | COG6    | 0.2122 | 0.0423  |
| YLR172C | DPH5    | YHR054C   | YHR054C | 0.2122 | -0.0363 |
| YBR229C | ROT2    | YNR034W   | SOL1    | 0.2121 | -0.1118 |
| YDR144C | MKC7    | YDL116W   | NUP84   | 0.2121 | 0.0588  |
| YML013W | UBX2    | YGL226W   | MTC3    | 0.2121 | 0.1476  |
| YGR023W | MTL1    | YJL163C   | YJL163C | 0.2119 | 0.1304  |
| YNR034W | SOL1    | YNL280C   | ERG24   | 0.2119 | 0.0091  |
| YAR027W | UIP3    | YNL124W   | NAF1    | 0.2117 | -0.0507 |
| YGR150C | CCM1    | YER182W   | FMP10   | 0.2115 | 0.0516  |
| YML091C | RPM2    | YLR442C   | SIR3    | 0.2114 | -0.1341 |
| YNL215W | IES2    | YER035W   | EDC2    | 0.2114 | -0.0028 |
| YKR080W | MTD1    | YLR057W   | MNL2    | 0.2112 | 0.0462  |
| YPL009C | RQC2    | YFR037C   | RSC8    | 0.2111 | 0.0373  |
| YDL047W | SIT4    | YOR264W   | DSE3    | 0.2110 | 0.0272  |
| YDL227C | Ho      | YGR001C   | EFM5    | 0.2109 | 0.0827  |
| YDR531W | CAB1    | YER023W   | PRO3    | 0.2107 | -0.1243 |
| YER046W | SPO73   | YEL076W-C | Unknown | 0.2107 | 0.0143  |
| YJL047C | RTT101  | YGL051W   | MST27   | 0.2107 | -0.1062 |
| YBL017C | PEP1    | YBR239C   | ERT1    | 0.2106 | 0.0843  |
| YER026C | CHO1    | YML048W   | GSF2    | 0.2106 | 0.0881  |
| YKL067W | YNK1    | YNL321W   | VNX1    | 0.2105 | -0.0845 |
| YMR112C | MED11   | YOL164W   | BDS1    | 0.2105 | -0.1664 |
| YDR180W | SCC2    | YDR351W   | SBE2    | 0.2101 | 0.2074  |

|         |         |         |         |        |         |
|---------|---------|---------|---------|--------|---------|
| YLR046C | YLR046C | YJL149W | DAS1    | 0.2101 | 0.1076  |
| YIL009W | FAA3    | YER116C | SLX8    | 0.2100 | -0.0881 |
| YOL088C | MPD2    | YGR023W | MTL1    | 0.2100 | 0.1289  |
| YOL094C | RFC4    | YDL217C | TIM22   | 0.2099 | 0.0284  |
| YGR207C | CIR1    | YGL017W | ATE1    | 0.2098 | -0.0078 |
| YDR144C | MKC7    | YIL142W | CCT2    | 0.2095 | 0.1269  |
| YJL212C | OPT1    | YHR034C | PIH1    | 0.2093 | -0.0007 |
| YLR059C | REX2    | YER020W | GPA2    | 0.2093 | 0.0455  |
| YIL066C | RNR3    | YJL187C | SWE1    | 0.2091 | 0.0273  |
| YKL160W | ELF1    | YIL009W | FAA3    | 0.2091 | -0.0426 |
| YLR442C | SIR3    | YJL051W | IRC8    | 0.2089 | -0.1068 |
| YOL043C | NTG2    | YPL144W | POC4    | 0.2088 | -0.0301 |
| YPR022C | SDD4    | YGL208W | SIP2    | 0.2087 | 0.0000  |
| YNL322C | KRE1    | YIL009W | FAA3    | 0.2086 | -0.0231 |
| YDL089W | NUR1    | YDL133W | SRF1    | 0.2084 | 0.0825  |
| YGL192W | IME4    | YNL022C | RCM1    | 0.2084 | -0.0788 |
| YLL040C | VPS13   | YML036W | CGI121  | 0.2081 | -0.2198 |
| YJL171C | TOH1    | YKR080W | MTD1    | 0.2080 | -0.0065 |
| YKL183W | LOT5    | YML110C | COQ5    | 0.2080 | -0.0581 |
| YBR077C | SLM4    | YBR087W | RFC5    | 0.2079 | 0.0621  |
| YDL211C | YDL211C | YBR008C | FLR1    | 0.2079 | 0.0013  |
| YDR528W | HLR1    | YOR088W | YOR088W | 0.2078 | -0.0155 |
| YFL056C | AAD6    | YJL171C | TOH1    | 0.2077 | 0.0678  |
| YOR043W | WHI2    | YML036W | CGI121  | 0.2077 | -0.0936 |
| YOL153C | YOL153C | YDR513W | GRX2    | 0.2075 | 0.2804  |
| YBR274W | CHK1    | YLR047C | FRE8    | 0.2074 | 0.1012  |
| YDL132W | CDC53   | YNL322C | KRE1    | 0.2074 | -0.0673 |
| YDL111C | RRP42   | YBR225W | YBR225W | 0.2074 | -0.0308 |
| YJL183W | MNN11   | YOR144C | ELG1    | 0.2074 | 0.0013  |
| YLR287C | YLR287C | YJR068W | RFC2    | 0.2073 | 0.0148  |
| YGR152C | RSR1    | YJL187C | SWE1    | 0.2072 | 0.0164  |
| YDR420W | HKR1    | YPL016W | SWI1    | 0.2071 | 0.0131  |
| YGL035C | MIG1    | YIL061C | SNP1    | 0.2070 | -0.0081 |
| YNL278W | CAF120  | YOL164W | BDS1    | 0.2070 | -0.1421 |
| YFR004W | RPN11   | YGR012W | MCY1    | 0.2069 | 0.0114  |
| YGR023W | MTL1    | YOL088C | MPD2    | 0.2069 | 0.1422  |
| YLR176C | RFX1    | YLR172C | DPH5    | 0.2068 | -0.0264 |
| YLR248W | RCK2    | YGR149W | GPC1    | 0.2068 | 0.1118  |
| YBR229C | ROT2    | YBR154C | RPB5    | 0.2067 | 0.0588  |
| YDR481C | PHO8    | YFR037C | RSC8    | 0.2067 | -0.1576 |
| YJR074W | MOG1    | YJL158C | CIS3    | 0.2067 | 0.0801  |
| YLL061W | MMP1    | YIL009W | FAA3    | 0.2065 | 0.0001  |
| YJL212C | OPT1    | YLL035W | GRC3    | 0.2063 | 0.0365  |
| YIL066C | RNR3    | YER049W | TPA1    | 0.2060 | -0.0077 |
| YJL212C | OPT1    | YJL149W | DAS1    | 0.2060 | -0.0378 |
| YKL110C | KTI12   | YGL192W | IME4    | 0.2060 | -0.0568 |
| YAL051W | OAF1    | YJL047C | RTT101  | 0.2059 | 0.1032  |



|         |         |         |         |        |         |
|---------|---------|---------|---------|--------|---------|
| YBR126C | TPS1    | YKL110C | KTI12   | 0.2059 | -0.1266 |
| YGL257C | MNT2    | YJL212C | OPT1    | 0.2058 | -0.0257 |
| YMR067C | UBX4    | YHR023W | MYO1    | 0.2058 | -0.0075 |
| YMR010W | ANY1    | YBR069C | TAT1    | 0.2057 | 0.1689  |
| YNR012W | URK1    | YGR288W | MAL13   | 0.2057 | -0.0531 |
| YLR435W | TSR2    | YLR206W | ENT2    | 0.2056 | -0.1118 |
| YBL029W | YBL029W | YLR047C | FRE8    | 0.2055 | -0.0373 |
| YOR251C | TUM1    | YBR274W | CHK1    | 0.2055 | -0.0884 |
| YLR368W | MDM30   | YLR052W | IES3    | 0.2054 | -0.0259 |
| YOL113W | SKM1    | YDR134C | YDR134C | 0.2053 | -0.1433 |
| YEL056W | HAT2    | YJL212C | OPT1    | 0.2052 | -0.1455 |
| YBR193C | MED8    | YDR339C | FCF1    | 0.2051 | -0.0103 |
| YHR050W | SMF2    | YIL166C | YIL166C | 0.2050 | -0.1340 |
| YLR237W | THI7    | YDR441C | APT2    | 0.2050 | 0.0738  |
| YML004C | GLO1    | YDL164C | CDC9    | 0.2050 | -0.0265 |
| YOR131C | YOR131C | YER116C | SLX8    | 0.2050 | -0.1210 |
| YIL119C | RPI1    | YLR368W | MDM30   | 0.2048 | 0.0481  |
| YIL119C | RPI1    | YLL035W | GRC3    | 0.2046 | -0.0129 |
| YLR096W | KIN2    | YDR441C | APT2    | 0.2046 | -0.0956 |
| YOR371C | GPB1    | YER185W | PUG1    | 0.2045 | 0.0826  |
| YPL016W | SWI1    | YPL001W | HAT1    | 0.2045 | 0.0306  |
| YBR037C | SCO1    | YCR083W | TRX3    | 0.2043 | 0.1612  |
| YBR087W | RFC5    | YOL164W | BDS1    | 0.2043 | -0.1488 |
| YKL073W | LHS1    | YGR149W | GPC1    | 0.2043 | 0.0609  |
| YIL158W | AIM20   | YDL116W | NUP84   | 0.2041 | 0.0294  |
| YJL183W | MNN11   | YDR064W | RPS13   | 0.2041 | 0.0073  |
| YFL056C | AAD6    | YDL150W | RPC53   | 0.2039 | 0.0277  |
| YPL234C | VMA11   | YBR161W | CSH1    | 0.2039 | 0.1118  |
| YPL031C | PHO85   | YMR112C | MED11   | 0.2039 | 0.0819  |
| YNL138W | SRV2    | YOR371C | GPB1    | 0.2035 | 0.0444  |
| YOL093W | TRM10   | YNL215W | IES2    | 0.2035 | 0.0092  |
| YDR144C | MKC7    | YPL064C | CWC27   | 0.2034 | -0.1341 |
| YDR481C | PHO8    | YJL158C | CIS3    | 0.2034 | -0.0045 |
| YLR258W | GSY2    | YBR071W | YBR071W | 0.2033 | -0.2462 |
| YBR249C | ARO4    | YKL096W | CWP1    | 0.2032 | -0.1226 |
| YBL007C | SLA1    | YHR054C | YHR054C | 0.2030 | 0.0901  |
| YKL019W | RAM2    | YGR258C | RAD2    | 0.2030 | -0.0364 |
| YFR013W | IOC3    | YGL195W | GCN1    | 0.2029 | 0.0613  |
| YNR012W | URK1    | YHR063C | PAN5    | 0.2029 | 0.1214  |
| YIR022W | SEC11   | YDR367W | KEI1    | 0.2028 | 0.0487  |
| YAL051W | OAF1    | YFR037C | RSC8    | 0.2027 | 0.0662  |
| YEL058W | PCM1    | YLR287C | YLR287C | 0.2027 | -0.0002 |
| YER022W | SRB4    | YNL124W | NAF1    | 0.2026 | -0.0799 |
| YER026C | CHO1    | YDR513W | GRX2    | 0.2026 | 0.0812  |
| YDR180W | SCC2    | YAR027W | UIP3    | 0.2025 | -0.2373 |
| YJL218W | YJL218W | YLR176C | RFX1    | 0.2022 | -0.0441 |
| YGR012W | MCY1    | YOR088W | YOR088W | 0.2020 | 0.0221  |

|         |         |         |         |        |         |
|---------|---------|---------|---------|--------|---------|
| YDR530C | APA2    | YGL169W | SUA5    | 0.2019 | -0.0392 |
| YLR330W | CHS5    | YBR008C | FLR1    | 0.2019 | -0.0745 |
| YOL113W | SKM1    | YGL035C | MIG1    | 0.2019 | -0.0391 |
| YHL048W | COS8    | YLR342W | FKS1    | 0.2018 | 0.0517  |
| YPL009C | RQC2    | YML071C | COG8    | 0.2016 | 0.0067  |
| YJL212C | OPT1    | YKR051W | YKR051W | 0.2015 | 0.0316  |
| YGR006W | PRP18   | YLR442C | SIR3    | 0.2014 | 0.0081  |
| YGL051W | MST27   | YJR073C | OPI3    | 0.2013 | 0.0049  |
| YDR497C | ITR1    | YGR001C | EFM5    | 0.2012 | -0.0578 |
| YER026C | CHO1    | YIR022W | SEC11   | 0.2012 | 0.0947  |
| YGL035C | MIG1    | YGR222W | PET54   | 0.2011 | 0.0123  |
| YLR442C | SIR3    | YIL009W | FAA3    | 0.2009 | -0.0014 |
| YCL009C | ILV6    | YGL176C | YGL176C | 0.2007 | -0.1017 |
| YDL135C | RDI1    | YDL111C | RRP42   | 0.2006 | 0.0003  |
| YIL112W | HOS4    | YLR047C | FRE8    | 0.2004 | 0.0298  |
| YLR046C | YLR046C | YMR123W | PKR1    | 0.2003 | -0.0453 |
| YML098W | TAF13   | YDR530C | APA2    | 0.2002 | 0.0226  |
| YKR075C | YKR075C | YNL074C | MLF3    | 0.2001 | 0.0902  |
| YAL056W | GPB2    | YNR036C | MRPS12  | 0.1998 | 0.0055  |
| YLR181C | VTA1    | YLR375W | STP3    | 0.1998 | -0.0074 |
| YJL178C | ATG27   | YIL066C | RNR3    | 0.1997 | -0.0005 |
| YER035W | EDC2    | YGL193C | YGL193C | 0.1996 | 0.0405  |
| YMR067C | UBX4    | YIL040W | APQ12   | 0.1996 | 0.0626  |
| YGL208W | SIP2    | YHR016C | YSC84   | 0.1995 | 0.0502  |
| YGR023W | MTL1    | YDR319C | YFT2    | 0.1994 | -0.0899 |
| YHR063C | PAN5    | YOL088C | MPD2    | 0.1994 | -0.0017 |
| YML013W | UBX2    | YDL164C | CDC9    | 0.1994 | 0.0137  |
| YDR497C | ITR1    | YBL007C | SLA1    | 0.1993 | 0.0601  |
| YNL138W | SRV2    | YOL088C | MPD2    | 0.1993 | -0.0978 |
| YCL009C | ILV6    | YDR515W | SLF1    | 0.1992 | -0.1245 |
| YBR163W | EXO5    | YOL026C | MIM1    | 0.1987 | -0.1090 |
| YGL035C | MIG1    | YLR375W | STP3    | 0.1984 | -0.0007 |
| YIL166C | YIL166C | YDR034C | LYS14   | 0.1984 | 0.0076  |
| YBR067C | TIP1    | YGL051W | MST27   | 0.1983 | 0.0005  |
| YGL193C | YGL193C | YIL009W | FAA3    | 0.1982 | -0.0733 |
| YEL058W | PCM1    | YJL163C | YJL163C | 0.1981 | -0.0547 |
| YIL046W | MET30   | YHR063C | PAN5    | 0.1981 | 0.0550  |
| YJR025C | BNA1    | YDL167C | NRP1    | 0.1981 | -0.0223 |
| YNL200C | NNR1    | YOL130W | ALR1    | 0.1981 | -0.2819 |
| YJL217W | REE1    | YHR027C | RPN1    | 0.1980 | 0.0271  |
| YER046W | SPO73   | YNL041C | COG6    | 0.1979 | 0.0372  |
| YGL035C | MIG1    | YBL030C | PET9    | 0.1979 | 0.0035  |
| YKL073W | LHS1    | YPL144W | POC4    | 0.1977 | -0.1083 |
| YDR420W | HKR1    | YPL144W | POC4    | 0.1975 | -0.0438 |
| YER020W | GPA2    | YOL088C | MPD2    | 0.1975 | 0.1904  |
| YOL153C | YOL153C | YAL056W | GPB2    | 0.1975 | 0.1077  |
| YLR342W | FKS1    | YBL014C | RRN6    | 0.1974 | -0.0005 |

|           |         |         |         |        |         |
|-----------|---------|---------|---------|--------|---------|
| YOL164W   | BDS1    | YML036W | CGI121  | 0.1974 | -0.0434 |
| YOL018C   | TLG2    | YOL062C | APM4    | 0.1973 | 0.0423  |
| YFR011C   | MIC19   | YER022W | SRB4    | 0.1971 | 0.1083  |
| YER186C   | YER186C | YEL056W | HAT2    | 0.1969 | 0.0001  |
| YNL200C   | NNR1    | YGR209C | TRX2    | 0.1969 | 0.1454  |
| YGL226C-A | OST5    | YOL081W | IRA2    | 0.1968 | -0.0042 |
| YPR015C   | YPR015C | YER026C | CHO1    | 0.1968 | 0.0001  |
| YML079W   | YML079W | YLR056W | ERG3    | 0.1966 | -0.0123 |
| YFL049W   | SWP82   | YPL058C | PDR12   | 0.1964 | 0.0342  |
| YHR034C   | PIH1    | YJL051W | IRC8    | 0.1962 | 0.0795  |
| YBR157C   | ICS2    | YOR131C | YOR131C | 0.1961 | -0.0128 |
| YGL226W   | MTC3    | YGR157W | CHO2    | 0.1961 | -0.0182 |
| YIL112W   | HOS4    | YLL024C | SSA2    | 0.1959 | -0.0126 |
| YJL051W   | IRC8    | YOL093W | TRM10   | 0.1959 | -0.0084 |
| YLR057W   | MNL2    | YOL147C | PEX11   | 0.1958 | 0.0603  |
| YBL079W   | NUP170  | YOR080W | DIA2    | 0.1956 | -0.2069 |
| YGL195W   | GCN1    | YFR013W | IOC3    | 0.1956 | 0.2332  |
| YGL004C   | RPN14   | YJR025C | BNA1    | 0.1956 | -0.0019 |
| YBR168W   | PEX32   | YLR258W | GSY2    | 0.1955 | 0.0116  |
| YKL160W   | ELF1    | YJL051W | IRC8    | 0.1955 | 0.0824  |
| YOL113W   | SKM1    | YGR023W | MTL1    | 0.1955 | -0.0754 |
| YOR131C   | YOR131C | YBL017C | PEP1    | 0.1955 | -0.0461 |
| YGR023W   | MTL1    | YKL073W | LHS1    | 0.1954 | -0.0883 |
| YJL171C   | TOH1    | YDR180W | SCC2    | 0.1954 | -0.0014 |
| YPL031C   | PHO85   | YJL163C | YJL163C | 0.1954 | 0.1439  |
| YML098W   | TAF13   | YGR222W | PET54   | 0.1953 | -0.0486 |
| YJL140W   | RPB4    | YPL234C | VMA11   | 0.1952 | 0.0559  |
| YBR037C   | SCO1    | YML110C | COQ5    | 0.1951 | 0.0104  |
| YMR152W   | YIM1    | YHR054C | YHR054C | 0.1949 | -0.0378 |
| YPL226W   | NEW1    | YPL012W | RRP12   | 0.1949 | 0.0844  |
| YOL130W   | ALR1    | YLR442C | SIR3    | 0.1948 | 0.0268  |
| YOL093W   | TRM10   | YLR046C | YLR046C | 0.1948 | -0.1369 |
| YGL017W   | ATE1    | YHR029C | YHI9    | 0.1947 | 0.0478  |
| YGL176C   | YGL176C | YGR023W | MTL1    | 0.1945 | -0.0472 |
| YJL212C   | OPT1    | YOR088W | YOR088W | 0.1945 | 0.0035  |
| YCL009C   | ILV6    | YML016C | PPZ1    | 0.1942 | 0.1651  |
| YCR031C   | RPS14a  | YNL022C | RCM1    | 0.1939 | 0.0462  |
| YOR196C   | LIP5    | YDL217C | TIM22   | 0.1939 | 0.1815  |
| YML072C   | TCB3    | YDR319C | YFT2    | 0.1936 | -0.0886 |
| YPL031C   | PHO85   | YLR057W | MNL2    | 0.1935 | -0.0594 |
| YFL016C   | MDJ1    | YBR239C | ERT1    | 0.1934 | 0.1130  |
| YKR051W   | YKR051W | YOL062C | APM4    | 0.1933 | 0.0849  |
| YML004C   | GLO1    | YGR152C | RSR1    | 0.1933 | -0.0984 |
| YDR441C   | APT2    | YJL047C | RTT101  | 0.1932 | -0.0169 |
| YIL040W   | APQ12   | YML110C | COQ5    | 0.1932 | -0.0264 |
| YJL217W   | REE1    | YHR063C | PAN5    | 0.1932 | -0.0012 |
| YDR064W   | RPS13   | YJL183W | MNN11   | 0.1931 | 0.0942  |

|         |         |         |         |        |         |
|---------|---------|---------|---------|--------|---------|
| YOR103C | OST2    | YMR215W | GAS3    | 0.1931 | 0.0335  |
| YKR051W | YKR051W | YLR257W | YLR257W | 0.1927 | 0.0104  |
| YDR134C | YDR134C | YLR426W | TDA5    | 0.1926 | -0.0575 |
| YJR068W | RFC2    | YJL183W | MNN11   | 0.1925 | 0.1319  |
| YMR123W | PKR1    | YPL237W | SUI3    | 0.1924 | 0.0039  |
| YOR103C | OST2    | YDR367W | KEI1    | 0.1922 | 0.0006  |
| YEL056W | HAT2    | YER186C | YER186C | 0.1921 | 0.0270  |
| YLR426W | TDA5    | YLR047C | FRE8    | 0.1921 | 0.0423  |
| YDL097C | RPN6    | YIL158W | AIM20   | 0.1920 | 0.0308  |
| YNL035C | YNL035C | YDL133W | SRF1    | 0.1920 | -0.0902 |
| YNL329C | PEX6    | YPL234C | VMA11   | 0.1919 | -0.0005 |
| YOR043W | WHI2    | YDR180W | SCC2    | 0.1915 | -0.0039 |
| YLR180W | SAM1    | YOR196C | LIP5    | 0.1914 | -0.0060 |
| YML079W | YML079W | YGL169W | SUA5    | 0.1913 | -0.1330 |
| YJL208C | NUC1    | YIL066C | RNR3    | 0.1912 | -0.1548 |
| YBR147W | RTC2    | YGR211W | ZPR1    | 0.1911 | -0.1868 |
| YLR258W | GSY2    | YKL067W | YNK1    | 0.1909 | 0.0595  |
| YLR330W | CHS5    | YDR420W | HKR1    | 0.1907 | -0.0632 |
| YLR389C | STE23   | YLR046C | YLR046C | 0.1906 | 0.0473  |
| YOL093W | TRM10   | YJL051W | IRC8    | 0.1905 | -0.1192 |
| YDL111C | RRP42   | YDR144C | MKC7    | 0.1904 | 0.0310  |
| YKL110C | KTI12   | YJL212C | OPT1    | 0.1904 | 0.1687  |
| YIL111W | COX5b   | YGR023W | MTL1    | 0.1902 | 0.0254  |
| YKL160W | ELF1    | YOR051C | ETT1    | 0.1900 | 0.1073  |
| YML110C | COQ5    | YBR067C | TIP1    | 0.1900 | 0.0488  |
| YDR524C | AGE1    | YIL158W | AIM20   | 0.1899 | 0.0527  |
| YNL022C | RCM1    | YDL150W | RPC53   | 0.1899 | 0.1866  |
| YDR528W | HLR1    | YGR194C | XKS1    | 0.1897 | -0.0639 |
| YNL322C | KRE1    | YJL212C | OPT1    | 0.1897 | -0.1367 |
| YPL183C | RTT10   | YGL176C | YGL176C | 0.1896 | 0.0021  |
| YGL226W | MTC3    | YPL144W | POC4    | 0.1895 | 0.0922  |
| YGR157W | CHO2    | YOR033C | EXO1    | 0.1895 | 0.0620  |
| YKL019W | RAM2    | YOL026C | MIM1    | 0.1894 | -0.0533 |
| YGL201C | MCM6    | YJR032W | CPR7    | 0.1893 | 0.0772  |
| YLR172C | DPH5    | YBL014C | RRN6    | 0.1893 | 0.0525  |
| YKL092C | BUD2    | YML016C | PPZ1    | 0.1892 | -0.0580 |
| YGL169W | SUA5    | YER037W | PHM8    | 0.1891 | -0.0111 |
| YJR040W | GEF1    | YFR037C | RSC8    | 0.1889 | 0.1371  |
| YDL155W | CLB3    | YHR027C | RPN1    | 0.1887 | -0.0573 |
| YPR196W | YPR196W | YOL088C | MPD2    | 0.1887 | -0.0532 |
| YLL040C | VPS13   | YJL149W | DAS1    | 0.1886 | 0.0933  |
| YMR158W | MRPS8   | YDL132W | CDC53   | 0.1886 | -0.2263 |
| YBR132C | AGP2    | YOL092W | YPQ1    | 0.1885 | 0.0571  |
| YIR022W | SEC11   | YOR033C | EXO1    | 0.1883 | -0.0177 |
| YJL217W | REE1    | YMR112C | MED11   | 0.1883 | -0.0353 |
| YDL002C | NHP10   | YDR513W | GRX2    | 0.1878 | 0.0414  |
| YOR131C | YOR131C | YBR071W | YBR071W | 0.1878 | 0.0134  |

|         |         |         |         |        |         |
|---------|---------|---------|---------|--------|---------|
| YLR180W | SAM1    | YJR032W | CPR7    | 0.1876 | -0.0078 |
| YBL020W | RFT1    | YOL147C | PEX11   | 0.1874 | -0.1388 |
| YJR084W | YJR084W | YGR152C | RSR1    | 0.1872 | 0.0145  |
| YNL329C | PEX6    | YOL147C | PEX11   | 0.1872 | 0.0953  |
| YBR069C | TAT1    | YOR264W | DSE3    | 0.1871 | 0.0031  |
| YGL025C | PGD1    | YGL176C | YGL176C | 0.1870 | 0.0089  |
| YLR096W | KIN2    | YJR086W | STE18   | 0.1870 | -0.0470 |
| YAL051W | OAF1    | YMR209C | YMR209C | 0.1868 | 0.0457  |
| YNL124W | NAF1    | YML091C | RPM2    | 0.1866 | -0.1108 |
| YNL124W | NAF1    | YOR371C | GPB1    | 0.1866 | 0.1014  |
| YJL212C | OPT1    | YKL110C | KTI12   | 0.1864 | 0.0008  |
| YPR196W | YPR196W | YGR157W | CHO2    | 0.1864 | -0.0586 |
| YDL227C | Ho      | YNL135C | FPR1    | 0.1863 | 0.0004  |
| YLR455W | PDP3    | YJR040W | GEF1    | 0.1863 | 0.0033  |
| YCL039W | GID7    | YLL035W | GRC3    | 0.1862 | -0.0105 |
| YIR022W | SEC11   | YJL051W | IRC8    | 0.1862 | -0.1826 |
| YER019W | ISC1    | YOL018C | TLG2    | 0.1861 | 0.0208  |
| YLR052W | IES3    | YBR147W | RTC2    | 0.1861 | -0.0079 |
| YBR239C | ERT1    | YDL103C | QRI1    | 0.1860 | -0.0430 |
| YBL089W | AVT5    | YHR016C | YSC84   | 0.1858 | -0.0479 |
| YDL111C | RRP42   | YOL018C | TLG2    | 0.1857 | -0.0033 |
| YJL187C | SWE1    | YIL066C | RNR3    | 0.1857 | 0.0452  |
| YGR152C | RSR1    | YLR330W | CHS5    | 0.1856 | 0.0282  |
| YIL171W | YIL171W | YER116C | SLX8    | 0.1856 | -0.0639 |
| YGR207C | CIR1    | YGL208W | SIP2    | 0.1855 | 0.0001  |
| YJL154C | VPS35   | YDL150W | RPC53   | 0.1855 | -0.0185 |
| YOR048C | RAT1    | YBL079W | NUP170  | 0.1854 | 0.1437  |
| YIL166C | YIL166C | YDL047W | SIT4    | 0.1853 | -0.0340 |
| YML071C | COG8    | YML091C | RPM2    | 0.1852 | 0.0982  |
| YBR077C | SLM4    | YBR274W | CHK1    | 0.1851 | 0.0923  |
| YKL021C | MAK11   | YIR026C | YVH1    | 0.1850 | 0.1052  |
| YPL147W | PXA1    | YDR180W | SCC2    | 0.1850 | 0.0063  |
| YPL183C | RTT10   | YLR449W | FPR4    | 0.1849 | 0.2502  |
| YFR013W | IOC3    | YLR375W | STP3    | 0.1847 | -0.0257 |
| YJR103W | URA8    | YPL001W | HAT1    | 0.1847 | -0.1085 |
| YOR103C | OST2    | YMR046C | YMR046C | 0.1845 | -0.0360 |
| YDL111C | RRP42   | YDL211C | YDL211C | 0.1843 | -0.0595 |
| YJR056C | YJR056C | YCL009C | ILV6    | 0.1843 | -0.0603 |
| YML007W | YAP1    | YBR166C | TYR1    | 0.1842 | 0.0024  |
| YOL081W | IRA2    | YML038C | YMD8    | 0.1841 | 0.0197  |
| YDL150W | RPC53   | YBR069C | TAT1    | 0.1840 | 0.0623  |
| YER144C | UBP5    | YKL116C | PRR1    | 0.1839 | 0.0464  |
| YLR342W | FKS1    | YGL178W | MPT5    | 0.1836 | 0.1061  |
| YDR064W | RPS13   | YIL009W | FAA3    | 0.1834 | 0.2889  |
| YHR209W | CRG1    | YER116C | SLX8    | 0.1834 | 0.0399  |
| YKL092C | BUD2    | YPL144W | POC4    | 0.1834 | 0.0157  |
| YFR047C | BNA6    | YDL167C | NRP1    | 0.1832 | -0.1716 |

|         |         |         |         |        |         |
|---------|---------|---------|---------|--------|---------|
| YML098W | TAF13   | YER186C | YER186C | 0.1832 | -0.0425 |
| YBL017C | PEP1    | YOR131C | YOR131C | 0.1830 | -0.0047 |
| YGL201C | MCM6    | YJL140W | RPB4    | 0.1829 | -0.0035 |
| YBL029W | YBL029W | YER020W | GPA2    | 0.1827 | 0.0347  |
| YHR033W | YHR033W | YMR005W | TAF4    | 0.1826 | 0.0765  |
| YML072C | TCB3    | YGR152C | RSR1    | 0.1826 | -0.0636 |
| YDR034C | LYS14   | YDL180W | YDL180W | 0.1825 | 0.1078  |
| YER186C | YER186C | YLR426W | TDA5    | 0.1823 | 0.1379  |
| YGL035C | MIG1    | YJL178C | ATG27   | 0.1821 | -0.0743 |
| YJL163C | YJL163C | YEL058W | PCM1    | 0.1820 | -0.0957 |
| YMR152W | YIM1    | YDL150W | RPC53   | 0.1819 | -0.0744 |
| YOL043C | NTG2    | YOR092W | ECM3    | 0.1818 | 0.0025  |
| YOR371C | GPB1    | YGL192W | IME4    | 0.1818 | 0.1093  |
| YBR067C | TIP1    | YOR088W | YOR088W | 0.1816 | -0.0957 |
| YBR193C | MED8    | YKL092C | BUD2    | 0.1816 | -0.0187 |
| YBR121C | GRS1    | YPL234C | VMA11   | 0.1814 | 0.0690  |
| YHR115C | DMA1    | YKL184W | SPE1    | 0.1811 | 0.0831  |
| YLR248W | RCK2    | YLR375W | STP3    | 0.1810 | 0.0831  |
| YOR142W | LSC1    | YPL144W | POC4    | 0.1809 | 0.1160  |
| YER019W | ISC1    | YGR149W | GPC1    | 0.1808 | 0.0248  |
| YLL040C | VPS13   | YGL051W | MST27   | 0.1808 | -0.0064 |
| YBR147W | RTC2    | YJL183W | MNN11   | 0.1807 | -0.0264 |
| YJL126W | NIT2    | YDR034C | LYS14   | 0.1805 | -0.0501 |
| YOR196C | LIP5    | YOL088C | MPD2    | 0.1805 | -0.1967 |
| YDR515W | SLF1    | YHR027C | RPN1    | 0.1804 | 0.1462  |
| YER026C | CHO1    | YIL119C | RPI1    | 0.1803 | 0.0801  |
| YFR004W | RPN11   | YHR043C | DOG2    | 0.1803 | 0.1050  |
| YHR104W | GRE3    | YHR016C | YSC84   | 0.1803 | 0.1159  |
| YJR068W | RFC2    | YGL193C | YGL193C | 0.1802 | -0.0636 |
| YFR013W | IOC3    | YMR209C | YMR209C | 0.1799 | -0.0552 |
| YEL071W | DLD3    | YNR036C | MRPS12  | 0.1798 | -0.0703 |
| YOR117W | RPT5    | YFR013W | IOC3    | 0.1797 | 0.0437  |
| YJL126W | NIT2    | YGR157W | CHO2    | 0.1795 | -0.0430 |
| YML048W | GSF2    | YBL020W | RFT1    | 0.1794 | 0.0814  |
| YIL061C | SNP1    | YPL001W | HAT1    | 0.1791 | -0.0666 |
| YOR196C | LIP5    | YDL133W | SRF1    | 0.1791 | 0.1082  |
| YDR513W | GRX2    | YLR257W | YLR257W | 0.1790 | 0.1350  |
| YLR180W | SAM1    | YLR046C | YLR046C | 0.1790 | -0.0605 |
| YLR452C | SST2    | YER023W | PRO3    | 0.1790 | 0.0299  |
| YGR006W | PRP18   | YOR144C | ELG1    | 0.1787 | 0.0035  |
| YJR088C | EMC2    | YNL280C | ERG24   | 0.1786 | 0.0567  |
| YER035W | EDC2    | YOR196C | LIP5    | 0.1785 | 0.0405  |
| YPL031C | PHO85   | YOR103C | OST2    | 0.1781 | 0.0536  |
| YKL092C | BUD2    | YJL204C | RCY1    | 0.1780 | 0.0952  |
| YOR117W | RPT5    | YGR150C | CCM1    | 0.1773 | -0.0271 |
| YJL158C | CIS3    | YLR426W | TDA5    | 0.1772 | 0.0775  |
| YDL155W | CLB3    | YDL150W | RPC53   | 0.1771 | -0.0184 |

|         |         |           |         |        |         |
|---------|---------|-----------|---------|--------|---------|
| YMR158W | MRPS8   | YDR420W   | HKR1    | 0.1771 | -0.1024 |
| YNL280C | ERG24   | YHR034C   | PIH1    | 0.1771 | 0.0407  |
| YMR067C | UBX4    | YDL167C   | NRP1    | 0.1770 | 0.0629  |
| YBR121C | GRS1    | YIL112W   | HOS4    | 0.1765 | -0.1713 |
| YJL171C | TOH1    | YLR257W   | YLR257W | 0.1765 | 0.0282  |
| YLL028W | TPO1    | YNL329C   | PEX6    | 0.1764 | 0.0439  |
| YLR231C | BNA5    | YDR319C   | YFT2    | 0.1763 | 0.1025  |
| YLR375W | STP3    | YGL192W   | IME4    | 0.1762 | 0.1046  |
| YBR274W | CHK1    | YOL026C   | MIM1    | 0.1760 | -0.0272 |
| YDL047W | SIT4    | YPL009C   | RQC2    | 0.1760 | 0.0415  |
| YNL046W | YNL046W | YGL195W   | GCN1    | 0.1760 | 0.0635  |
| YPR080W | TEF1    | YNL041C   | COG6    | 0.1760 | -0.0130 |
| YLR052W | IES3    | YCL024W   | KCC4    | 0.1759 | 0.0454  |
| YMR010W | ANY1    | YPL001W   | HAT1    | 0.1759 | 0.0913  |
| YLR389C | STE23   | YOL026C   | MIM1    | 0.1758 | 0.0610  |
| YJR056C | YJR056C | YIL009W   | FAA3    | 0.1757 | 0.1262  |
| YOR371C | GPB1    | YEL020W-A | TIM9    | 0.1757 | -0.0378 |
| YJR036C | HUL4    | YMR067C   | UBX4    | 0.1756 | -0.0412 |
| YNL022C | RCM1    | YGR211W   | ZPR1    | 0.1756 | 0.2357  |
| YMR067C | UBX4    | YOR103C   | OST2    | 0.1754 | -0.0009 |
| YBR132C | AGP2    | YBR239C   | ERT1    | 0.1752 | 0.0510  |
| YLR248W | RCK2    | YDL150W   | RPC53   | 0.1752 | 0.0119  |
| YBR137W | YBR137W | YDR339C   | FCF1    | 0.1751 | -0.1317 |
| YFR042W | KEG1    | YFR013W   | IOC3    | 0.1751 | -0.0945 |
| YGL178W | MPT5    | YPL144W   | POC4    | 0.1749 | -0.0259 |
| YGR208W | SER2    | YLR237W   | THI7    | 0.1749 | -0.0571 |
| YIR026C | YVH1    | YGR211W   | ZPR1    | 0.1748 | 0.0275  |
| YCR071C | IMG2    | YGR207C   | CIR1    | 0.1746 | 0.0617  |
| YKR051W | YKR051W | YNL124W   | NAF1    | 0.1745 | -0.0530 |
| YOR043W | WHI2    | YDR441C   | APT2    | 0.1745 | -0.0501 |
| YPL031C | PHO85   | YNL124W   | NAF1    | 0.1745 | -0.0120 |
| YNL280C | ERG24   | YEL071W   | DLD3    | 0.1744 | -0.0623 |
| YJR086W | STE18   | YPL144W   | POC4    | 0.1743 | 0.1637  |
| YFL016C | MDJ1    | YDL217C   | TIM22   | 0.1742 | 0.0361  |
| YJL118W | YJL118W | YIL066C   | RNR3    | 0.1741 | 0.1025  |
| YBR166C | TYR1    | YFR004W   | RPN11   | 0.1739 | -0.0137 |
| YAL051W | OAF1    | YGL017W   | ATE1    | 0.1738 | 0.0120  |
| YDR528W | HLR1    | YOR092W   | ECM3    | 0.1738 | 0.0026  |
| YHR043C | DOG2    | YBR069C   | TAT1    | 0.1736 | 0.0610  |
| YLR368W | MDM30   | YLR257W   | YLR257W | 0.1735 | 0.0307  |
| YGR288W | MAL13   | YIL166C   | YIL166C | 0.1734 | 0.0663  |
| YLR172C | DPH5    | YNL138W   | SRV2    | 0.1734 | 0.0542  |
| YLR426W | TDA5    | YMR123W   | PKR1    | 0.1734 | 0.0357  |
| YBR225W | YBR225W | YER088C   | DOT6    | 0.1731 | 0.0026  |
| YIL112W | HOS4    | YOL081W   | IRA2    | 0.1729 | 0.1222  |
| YNL138W | SRV2    | YDR441C   | APT2    | 0.1726 | -0.0263 |
| YOL104C | NDJ1    | YFR013W   | IOC3    | 0.1726 | -0.2136 |

|           |         |         |         |        |         |
|-----------|---------|---------|---------|--------|---------|
| YCL009C   | ILV6    | YFL018C | LPD1    | 0.1725 | 0.0145  |
| YFR004W   | RPN11   | YFR037C | RSC8    | 0.1725 | 0.0259  |
| YPL237W   | SUI3    | YGR152C | RSR1    | 0.1724 | 0.2159  |
| YJL030W   | MAD2    | YBR163W | EXO5    | 0.1722 | 0.0697  |
| YBR121C   | GRS1    | YBR154C | RPB5    | 0.1721 | 0.0159  |
| YIR022W   | SEC11   | YOR127W | RGA1    | 0.1721 | -0.1003 |
| YDL047W   | SIT4    | YHR029C | YHI9    | 0.1720 | -0.0036 |
| YIL171W   | YIL171W | YDL047W | SIT4    | 0.1718 | -0.0165 |
| YKL092C   | BUD2    | YMR067C | UBX4    | 0.1718 | -0.0632 |
| YGL025C   | PGD1    | YOL147C | PEX11   | 0.1717 | -0.0697 |
| YIL043C   | CBR1    | YCL009C | ILV6    | 0.1717 | 0.0022  |
| YBL079W   | NUP170  | YDR319C | YFT2    | 0.1716 | -0.3030 |
| YEL020W-A | TIM9    | YBR168W | PEX32   | 0.1715 | 0.0247  |
| YNR036C   | MRPS12  | YLR443W | ECM7    | 0.1715 | -0.0362 |
| YER049W   | TPA1    | YBR069C | TAT1    | 0.1714 | 0.3063  |
| YFR037C   | RSC8    | YOR371C | GPB1    | 0.1714 | -0.0386 |
| YML038C   | YMD8    | YMR215W | GAS3    | 0.1713 | 0.0220  |
| YEL020W-A | TIM9    | YJR036C | HUL4    | 0.1712 | -0.0805 |
| YHR027C   | RPN1    | YJL126W | NIT2    | 0.1709 | -0.0207 |
| YGR028W   | MSP1    | YOL147C | PEX11   | 0.1708 | 0.1571  |
| YJL208C   | NUC1    | YPL031C | PHO85   | 0.1706 | -0.0187 |
| YML079W   | YML079W | YBR126C | TPS1    | 0.1706 | -0.0726 |
| YJR073C   | OPI3    | YLR180W | SAM1    | 0.1705 | 0.0413  |
| YNL046W   | YNL046W | YHR115C | DMA1    | 0.1705 | 0.0190  |
| YGL226C-A | OST5    | YHR027C | RPN1    | 0.1701 | 0.0752  |
| YLR176C   | RFX1    | YGL051W | MST27   | 0.1699 | -0.0719 |
| YER116C   | SLX8    | YMR010W | ANY1    | 0.1696 | -0.0082 |
| YHR039C   | MSC7    | YLR449W | FPR4    | 0.1693 | 0.0323  |
| YMR158W   | MRPS8   | YDR530C | APA2    | 0.1693 | -0.1738 |
| YOL130W   | ALR1    | YNL329C | PEX6    | 0.1691 | 0.0170  |
| YOL081W   | IRA2    | YNL041C | COG6    | 0.1691 | 0.0042  |
| YPL031C   | PHO85   | YBR077C | SLM4    | 0.1691 | 0.0496  |
| YOR131C   | YOR131C | YDR180W | SCC2    | 0.1689 | -0.1067 |
| YFL049W   | SWP82   | YGL207W | SPT16   | 0.1688 | 0.0527  |
| YHR054C   | YHR054C | YDR351W | SBE2    | 0.1687 | -0.0272 |
| YML072C   | TCB3    | YJR086W | STE18   | 0.1687 | 0.0660  |
| YER144C   | UBP5    | YJL187C | SWE1    | 0.1686 | 0.0414  |
| YOR371C   | GPB1    | YJR036C | HUL4    | 0.1681 | 0.1125  |
| YBR087W   | RFC5    | YIL119C | RPI1    | 0.1680 | -0.0001 |
| YDR064W   | RPS13   | YER186C | YER186C | 0.1678 | 0.1473  |
| YHL007C   | STE20   | YMR152W | YIM1    | 0.1678 | -0.1063 |
| YMR152W   | YIM1    | YER049W | TPA1    | 0.1678 | -0.0324 |
| YDR530C   | APA2    | YLR206W | ENT2    | 0.1675 | 0.0487  |
| YDR180W   | SCC2    | YOL153C | YOL153C | 0.1669 | -0.0986 |
| YLL035W   | GRC3    | YJL126W | NIT2    | 0.1669 | 0.0801  |
| YOL089C   | HAL9    | YML013W | UBX2    | 0.1669 | 0.0418  |
| YFR013W   | IOC3    | YML036W | CGI121  | 0.1666 | 0.0129  |



|         |         |         |         |        |         |
|---------|---------|---------|---------|--------|---------|
| YBR071W | YBR071W | YNL074C | MLF3    | 0.1665 | 0.0155  |
| YDR034C | LYS14   | YKL067W | YNK1    | 0.1664 | -0.0731 |
| YDR038C | ENA5    | YFR037C | RSC8    | 0.1664 | 0.0140  |
| YML038C | YMD8    | YML110C | COQ5    | 0.1663 | 0.1008  |
| YGL193C | YGL193C | YDL002C | NHP10   | 0.1661 | 0.0805  |
| YDL133W | SRF1    | YPL144W | POC4    | 0.1659 | -0.0818 |
| YLL035W | GRC3    | YBL089W | AVT5    | 0.1658 | -0.1017 |
| YOR251C | TUM1    | YGR157W | CHO2    | 0.1658 | -0.0082 |
| YGR012W | MCY1    | YKL096W | CWP1    | 0.1657 | -0.0204 |
| YOL097C | WRS1    | YBR249C | ARO4    | 0.1651 | 0.0646  |
| YML091C | RPM2    | YOR251C | TUM1    | 0.1650 | -0.0173 |
| YER182W | FMP10   | YDL171C | GLT1    | 0.1648 | -0.0011 |
| YFR047C | BNA6    | YER186C | YER186C | 0.1648 | 0.0504  |
| YGR149W | GPC1    | YOR264W | DSE3    | 0.1648 | 0.0462  |
| YGL226W | MTC3    | YDR144C | MKC7    | 0.1647 | -0.0280 |
| YMR154C | RIM13   | YMR112C | MED11   | 0.1645 | 0.0718  |
| YKR080W | MTD1    | YKL092C | BUD2    | 0.1644 | -0.0171 |
| YHR033W | YHR033W | YKR051W | YKR051W | 0.1643 | 0.0116  |
| YAR027W | UIP3    | YER116C | SLX8    | 0.1642 | 0.0328  |
| YBR161W | CSH1    | YER185W | PUG1    | 0.1641 | -0.1065 |
| YDR513W | GRX2    | YIL009W | FAA3    | 0.1638 | 0.1269  |
| YML110C | COQ5    | YLR046C | YLR046C | 0.1638 | -0.0140 |
| YHL007C | STE20   | YGL193C | YGL193C | 0.1637 | -0.0147 |
| YOL026C | MIM1    | YKL160W | ELF1    | 0.1637 | 0.0062  |
| YEL055C | POL5    | YCR031C | RPS14a  | 0.1636 | 0.0429  |
| YLR443W | ECM7    | YGL176C | YGL176C | 0.1636 | 0.0305  |
| YDR321W | ASP1    | YGL208W | SIP2    | 0.1635 | -0.1289 |
| YHR016C | YSC84   | YOR080W | DIA2    | 0.1634 | 0.1878  |
| YJR068W | RFC2    | YOL153C | YOL153C | 0.1634 | -0.0544 |
| YBR071W | YBR071W | YER186C | YER186C | 0.1633 | -0.1086 |
| YFL056C | AAD6    | YOR051C | ETT1    | 0.1633 | -0.0205 |
| YNL326C | PFA3    | YMR067C | UBX4    | 0.1633 | 0.0316  |
| YOL018C | TLG2    | YOR131C | YOR131C | 0.1633 | 0.0092  |
| YDR531W | CAB1    | YDL171C | GLT1    | 0.1631 | 0.0822  |
| YGR023W | MTL1    | YNR034W | SOL1    | 0.1631 | 0.0069  |
| YLR181C | VTA1    | YOR103C | OST2    | 0.1631 | 0.0400  |
| YPL071C | YPL071C | YJR074W | MOG1    | 0.1630 | -0.0221 |
| YMR067C | UBX4    | YGL226W | MTC3    | 0.1628 | 0.0069  |
| YKL184W | SPE1    | YJL158C | CIS3    | 0.1626 | -0.1433 |
| YOL147C | PEX11   | YGL051W | MST27   | 0.1625 | -0.0234 |
| YBR161W | CSH1    | YPL234C | VMA11   | 0.1623 | 0.0023  |
| YBR229C | ROT2    | YER144C | UBP5    | 0.1623 | -0.2510 |
| YHR063C | PAN5    | YJR025C | BNA1    | 0.1623 | 0.0464  |
| YDL135C | RDI1    | YER035W | EDC2    | 0.1622 | -0.0033 |
| YPL144W | POC4    | YBR274W | CHK1    | 0.1622 | -0.0886 |
| YKL110C | KTI12   | YKR051W | YKR051W | 0.1621 | -0.0015 |
| YDL116W | NUP84   | YDR441C | APT2    | 0.1620 | 0.0874  |

|         |         |         |         |        |         |
|---------|---------|---------|---------|--------|---------|
| YNL280C | ERG24   | YER182W | FMP10   | 0.1620 | -0.0615 |
| YDR351W | SBE2    | YIL046W | MET30   | 0.1619 | 0.0837  |
| YML048W | GSF2    | YHR016C | YSC84   | 0.1619 | -0.0593 |
| YGR289C | MAL11   | YCL024W | KCC4    | 0.1617 | -0.0418 |
| YIL112W | HOS4    | YPL183C | RTT10   | 0.1615 | -0.0016 |
| YDL002C | NHP10   | YGR012W | MCY1    | 0.1613 | -0.0041 |
| YDR524C | AGE1    | YNR034W | SOL1    | 0.1613 | 0.0776  |
| YEL068C | YEL068C | YBR087W | RFC5    | 0.1612 | -0.0078 |
| YJL171C | TOH1    | YML013W | UBX2    | 0.1610 | -0.0452 |
| YDL150W | RPC53   | YBR071W | YBR071W | 0.1609 | 0.0395  |
| YEL071W | DLD3    | YKL096W | CWP1    | 0.1609 | -0.0795 |
| YHR054C | YHR054C | YJL187C | SWE1    | 0.1607 | -0.0973 |
| YGL193C | YGL193C | YKL073W | LHS1    | 0.1603 | -0.0134 |
| YEL058W | PCM1    | YGR001C | EFM5    | 0.1601 | 0.0621  |
| YNL022C | RCM1    | YOR131C | YOR131C | 0.1601 | 0.0067  |
| YDL135C | RDI1    | YDR178W | SDH4    | 0.1600 | 0.0923  |
| YGR258C | RAD2    | YNL280C | ERG24   | 0.1600 | 0.0164  |
| YGR158C | MTR3    | YBR249C | ARO4    | 0.1597 | 0.0199  |
| YIL066C | RNR3    | YEL056W | HAT2    | 0.1596 | -0.0003 |
| YJL183W | MNN11   | YKR080W | MTD1    | 0.1594 | -0.0383 |
| YJL036W | SNX4    | YOR088W | YOR088W | 0.1591 | 0.0902  |
| YPL016W | SWI1    | YAL009W | SPO7    | 0.1591 | -0.0398 |
| YHR115C | DMA1    | YHR209W | CRG1    | 0.1588 | 0.0028  |
| YOL026C | MIM1    | YLR176C | RFX1    | 0.1588 | -0.1006 |
| YLR057W | MNL2    | YFL047W | RGD2    | 0.1587 | 0.0940  |
| YMR067C | UBX4    | YLR046C | YLR046C | 0.1587 | -0.0074 |
| YDR064W | RPS13   | YNL242W | ATG2    | 0.1583 | -0.0665 |
| YLR172C | DPH5    | YOR131C | YOR131C | 0.1583 | 0.1256  |
| YDR321W | ASP1    | YPL071C | YPL071C | 0.1581 | -0.0119 |
| YER182W | FMP10   | YER144C | UBP5    | 0.1580 | 0.0036  |
| YGR157W | CHO2    | YMR067C | UBX4    | 0.1580 | -0.0129 |
| YPL012W | RRP12   | YOR048C | RAT1    | 0.1579 | 0.2620  |
| YOR054C | VHS3    | YKL116C | PRR1    | 0.1578 | -0.0090 |
| YPL009C | RQC2    | YOR092W | ECM3    | 0.1577 | 0.1080  |
| YBL014C | RRN6    | YJL140W | RPB4    | 0.1575 | 0.0006  |
| YJR084W | YJR084W | YBR239C | ERT1    | 0.1574 | 0.0648  |
| YPL009C | RQC2    | YDR180W | SCC2    | 0.1573 | 0.0738  |
| YGR012W | MCY1    | YLR287C | YLR287C | 0.1571 | -0.0346 |
| YOL093W | TRM10   | YLR455W | PDP3    | 0.1570 | -0.1506 |
| YOR127W | RGA1    | YGR001C | EFM5    | 0.1569 | 0.0512  |
| YJL217W | REE1    | YER144C | UBP5    | 0.1568 | 0.0423  |
| YGL176C | YGL176C | YKR051W | YKR051W | 0.1564 | 0.0597  |
| YGL242C | YGL242C | YGR150C | CCM1    | 0.1561 | -0.0577 |
| YPL144W | POC4    | YJR086W | STE18   | 0.1559 | 0.0670  |
| YMR215W | GAS3    | YEL055C | POL5    | 0.1556 | 0.0389  |
| YJL126W | NIT2    | YBR147W | RTC2    | 0.1554 | -0.0020 |
| YDL111C | RRP42   | YMR215W | GAS3    | 0.1553 | -0.0732 |

|           |           |         |         |        |         |
|-----------|-----------|---------|---------|--------|---------|
| YDL132W   | CDC53     | YER186C | YER186C | 0.1551 | -0.0448 |
| YJL036W   | SNX4      | YGR012W | MCY1    | 0.1551 | 0.0088  |
| YIL040W   | APQ12     | YER186C | YER186C | 0.1550 | 0.0769  |
| YKL019W   | RAM2      | YGR001C | EFM5    | 0.1550 | 0.1207  |
| YGL201C   | MCM6      | YKL092C | BUD2    | 0.1549 | -0.0560 |
| YLR430W   | SEN1      | YBR069C | TAT1    | 0.1541 | -0.0862 |
| YML004C   | GLO1      | YIL009W | FAA3    | 0.1541 | -0.1489 |
| YLR426W   | TDA5      | YBR222C | PCS60   | 0.1539 | 0.0498  |
| YMR192W   | GYL1      | YDR319C | YFT2    | 0.1539 | 0.0945  |
| YDR497C   | ITR1      | YNR034W | SOL1    | 0.1538 | -0.0209 |
| YIL171W   | YIL171W   | YDR319C | YFT2    | 0.1538 | -0.1010 |
| YPR022C   | SDD4      | YFR013W | IOC3    | 0.1538 | 0.0232  |
| YJL036W   | SNX4      | YJL187C | SWE1    | 0.1537 | -0.0214 |
| YDR420W   | HKR1      | YML098W | TAF13   | 0.1535 | -0.0207 |
| YJL212C   | OPT1      | YLR206W | ENT2    | 0.1535 | -0.0279 |
| YBL089W   | AVT5      | YNL329C | PEX6    | 0.1534 | -0.0352 |
| YGR258C   | RAD2      | YOL092W | YPQ1    | 0.1532 | -0.1072 |
| YIL166C   | YIL166C   | YGR158C | MTR3    | 0.1531 | -0.0646 |
| YBR161W   | CSH1      | YML048W | GSF2    | 0.1530 | 0.0552  |
| YIL165C   | YIL165C   | YJL051W | IRC8    | 0.1530 | -0.0851 |
| YHR039C   | MSC7      | YDR420W | HKR1    | 0.1529 | 0.0475  |
| YCL039W   | GID7      | YNL124W | NAF1    | 0.1527 | 0.0203  |
| YCL026C-A | FRM2      | YKL125W | RRN3    | 0.1527 | 0.0807  |
| YIL040W   | APQ12     | YOL026C | MIM1    | 0.1527 | -0.0924 |
| YPL144W   | POC4      | YOL026C | MIM1    | 0.1526 | 0.0000  |
| YGR208W   | SER2      | YBR137W | YBR137W | 0.1524 | 0.0211  |
| YPL009C   | RQC2      | YNL041C | COG6    | 0.1524 | 0.1053  |
| YBR229C   | ROT2      | YOL088C | MPD2    | 0.1523 | 0.0801  |
| YML072C   | TCB3      | YGR001C | EFM5    | 0.1523 | -0.0134 |
| YER019W   | ISC1      | YER026C | CHO1    | 0.1521 | -0.0587 |
| YML007W   | YAP1      | YDR351W | SBE2    | 0.1519 | 0.0003  |
| YIL133C   | RPL16a    | YBL029W | YBL029W | 0.1517 | -0.1542 |
| YLR047C   | FRE8      | YDR180W | SCC2    | 0.1516 | 0.0306  |
| YCR041W   | YCR041W   | YOR371C | GPB1    | 0.1515 | -0.0593 |
| YER144C   | UBP5      | YLR257W | YLR257W | 0.1515 | 0.0369  |
| YGR207C   | CIR1      | YDR180W | SCC2    | 0.1512 | -0.0360 |
| YJL036W   | SNX4      | YHL007C | STE20   | 0.1512 | 0.0425  |
| YOL092W   | YPQ1      | YPL009C | RQC2    | 0.1509 | 0.0428  |
| YGL201C   | MCM6      | YDR319C | YFT2    | 0.1508 | -0.0450 |
| YHR029C   | YHI9      | YNL124W | NAF1    | 0.1508 | 0.1007  |
| YEL055C   | POL5      | YER088C | DOT6    | 0.1505 | -0.2520 |
| YIL015C-A | YIL015C-A | YLR375W | STP3    | 0.1505 | -0.0112 |
| YDR530C   | APA2      | YIL112W | HOS4    | 0.1503 | 0.0125  |
| YNL035C   | YNL035C   | YBR071W | YBR071W | 0.1501 | -0.0417 |
| YLL040C   | VPS13     | YOR131C | YOR131C | 0.1500 | -0.0006 |
| YDR319C   | YFT2      | YKL092C | BUD2    | 0.1499 | -0.1500 |
| YIL133C   | RPL16a    | YML013W | UBX2    | 0.1498 | -0.2241 |

|           |         |         |         |        |         |
|-----------|---------|---------|---------|--------|---------|
| YBL014C   | RRN6    | YBR008C | FLR1    | 0.1497 | 0.0004  |
| YBR157C   | ICS2    | YGR001C | EFM5    | 0.1496 | -0.1473 |
| YDR481C   | PHO8    | YOL147C | PEX11   | 0.1496 | 0.1137  |
| YPL009C   | RQC2    | YFR013W | IOC3    | 0.1496 | 0.0196  |
| YBR077C   | SLM4    | YDL150W | RPC53   | 0.1495 | -0.0274 |
| YGR028W   | MSP1    | YOL062C | APM4    | 0.1494 | 0.1037  |
| YKL116C   | PRR1    | YDR441C | APT2    | 0.1493 | -0.0515 |
| YMR152W   | YIM1    | YNL242W | ATG2    | 0.1493 | 0.0475  |
| YER022W   | SRB4    | YDL217C | TIM22   | 0.1492 | -0.0186 |
| YKL019W   | RAM2    | YKL073W | LHS1    | 0.1492 | 0.0193  |
| YMR010W   | ANY1    | YOL062C | APM4    | 0.1490 | 0.0603  |
| YMR115W   | MGR3    | YER116C | SLX8    | 0.1489 | -0.0121 |
| YNL074C   | MLF3    | YKL067W | YNK1    | 0.1489 | -0.0529 |
| YPL058C   | PDR12   | YJL149W | DAS1    | 0.1488 | -0.0671 |
| YDR524C   | AGE1    | YJL187C | SWE1    | 0.1481 | 0.0771  |
| YIR022W   | SEC11   | YBR163W | EXO5    | 0.1480 | -0.0505 |
| YOL062C   | APM4    | YLR046C | YLR046C | 0.1480 | 0.0167  |
| YOR101W   | RAS1    | YMR192W | GYL1    | 0.1480 | -0.0137 |
| YDR531W   | CAB1    | YDR530C | APA2    | 0.1479 | 0.1393  |
| YKL125W   | RRN3    | YNL022C | RCM1    | 0.1478 | 0.0008  |
| YDR383C   | NKP1    | YNL138W | SRV2    | 0.1477 | -0.1142 |
| YJL158C   | CIS3    | YPL071C | YPL071C | 0.1472 | -0.0801 |
| YJR097W   | JJJ3    | YBR087W | RFC5    | 0.1472 | 0.0184  |
| YJL051W   | IRC8    | YIL009W | FAA3    | 0.1471 | 0.0739  |
| YJR008W   | MHO1    | YJL178C | ATG27   | 0.1470 | 0.0750  |
| YDL111C   | RRP42   | YKL092C | BUD2    | 0.1469 | -0.0665 |
| YML038C   | YMD8    | YER144C | UBP5    | 0.1469 | 0.0137  |
| YER049W   | TPA1    | YOR048C | RAT1    | 0.1461 | 0.0075  |
| YNL326C   | PFA3    | YKL092C | BUD2    | 0.1460 | -0.0342 |
| YHR043C   | DOG2    | YJR086W | STE18   | 0.1459 | -0.0233 |
| YBR249C   | ARO4    | YNR034W | SOL1    | 0.1457 | 0.1935  |
| YLR442C   | SIR3    | YMR112C | MED11   | 0.1456 | 0.1441  |
| YDR513W   | GRX2    | YLR206W | ENT2    | 0.1452 | 0.0939  |
| YMR112C   | MED11   | YKL067W | YNK1    | 0.1452 | -0.0525 |
| YMR209C   | YMR209C | YPL001W | HAT1    | 0.1450 | -0.0333 |
| YLR258W   | GSY2    | YDR134C | YDR134C | 0.1449 | 0.2009  |
| YNL046W   | YNL046W | YFR013W | IOC3    | 0.1445 | -0.1473 |
| YKL019W   | RAM2    | YJR074W | MOG1    | 0.1442 | 0.0026  |
| YPR080W   | TEF1    | YOR088W | YOR088W | 0.1441 | -0.0199 |
| YCL026C-A | FRM2    | YIR026C | YVH1    | 0.1440 | 0.0190  |
| YJL204C   | RCY1    | YBR071W | YBR071W | 0.1437 | -0.0864 |
| YGL017W   | ATE1    | YBL030C | PET9    | 0.1434 | -0.0173 |
| YIL043C   | CBR1    | YJL212C | OPT1    | 0.1431 | 0.0719  |
| YOL097C   | WRS1    | YER023W | PRO3    | 0.1430 | 0.2436  |
| YLR287C   | YLR287C | YFL016C | MDJ1    | 0.1428 | -0.0581 |
| YGL226W   | MTC3    | YCR083W | TRX3    | 0.1427 | 0.1354  |
| YCR083W   | TRX3    | YER144C | UBP5    | 0.1424 | 0.0761  |

|         |         |           |         |        |         |
|---------|---------|-----------|---------|--------|---------|
| YHL007C | STE20   | YDR319C   | YFT2    | 0.1417 | -0.0754 |
| YPR080W | TEF1    | YDR319C   | YFT2    | 0.1416 | -0.0151 |
| YGL193C | YGL193C | YPL058C   | PDR12   | 0.1415 | 0.0173  |
| YDL135C | RDI1    | YKL067W   | YNK1    | 0.1414 | 0.0082  |
| YLL024C | SSA2    | YMR067C   | UBX4    | 0.1413 | -0.0120 |
| YGL051W | MST27   | YOL088C   | MPD2    | 0.1412 | 0.0577  |
| YKR085C | MRPL20  | YDL150W   | RPC53   | 0.1412 | 0.0537  |
| YML079W | YML079W | YNL124W   | NAF1    | 0.1411 | -0.1217 |
| YDR383C | NKP1    | YKL073W   | LHS1    | 0.1409 | -0.0871 |
| YJR068W | RFC2    | YDR528W   | HLR1    | 0.1409 | 0.0125  |
| YBR222C | PCS60   | YHR063C   | PAN5    | 0.1406 | 0.0783  |
| YCR071C | IMG2    | YGL226C-A | OST5    | 0.1406 | 0.0474  |
| YIL040W | APQ12   | YLR455W   | PDP3    | 0.1406 | 0.0306  |
| YKL096W | CWP1    | YER144C   | UBP5    | 0.1406 | 0.0379  |
| YBR087W | RFC5    | YDL103C   | QRI1    | 0.1400 | 0.0055  |
| YER020W | GPA2    | YBL030C   | PET9    | 0.1400 | 0.0244  |
| YLR452C | SST2    | YGL176C   | YGL176C | 0.1397 | -0.1208 |
| YJL178C | ATG27   | YNL138W   | SRV2    | 0.1396 | 0.0703  |
| YIL171W | YIL171W | YML036W   | CGI121  | 0.1394 | -0.0906 |
| YLR046C | YLR046C | YDR319C   | YFT2    | 0.1394 | 0.0394  |
| YNL280C | ERG24   | YOR088W   | YOR088W | 0.1394 | 0.1783  |
| YMR215W | GAS3    | YKL073W   | LHS1    | 0.1392 | 0.1642  |
| YCR031C | RPS14a  | YOR088W   | YOR088W | 0.1391 | -0.1354 |
| YMR154C | RIM13   | YDL211C   | YDL211C | 0.1391 | -0.0048 |
| YGL017W | ATE1    | YLR257W   | YLR257W | 0.1390 | -0.0162 |
| YLR248W | RCK2    | YBL007C   | SLA1    | 0.1384 | 0.0001  |
| YPL012W | RRP12   | YGR209C   | TRX2    | 0.1382 | -0.1780 |
| YJR074W | MOG1    | YER026C   | CHO1    | 0.1379 | -0.0022 |
| YPL071C | YPL071C | YIL166C   | YIL166C | 0.1379 | -0.0031 |
| YPL064C | CWC27   | YEL020W-A | TIM9    | 0.1379 | 0.0791  |
| YBR157C | ICS2    | YML036W   | CGI121  | 0.1378 | 0.0806  |
| YOR251C | TUM1    | YML110C   | COQ5    | 0.1377 | 0.0225  |
| YBR121C | GRS1    | YLR375W   | STP3    | 0.1373 | -0.1308 |
| YPL031C | PHO85   | YOL147C   | PEX11   | 0.1373 | -0.0356 |
| YBL040C | ERD2    | YLL035W   | GRC3    | 0.1372 | -0.0284 |
| YBR168W | PEX32   | YJL158C   | CIS3    | 0.1371 | 0.0523  |
| YLR059C | REX2    | YBR061C   | TRM7    | 0.1368 | 0.0481  |
| YJL118W | YJL118W | YLR057W   | MNL2    | 0.1367 | -0.0107 |
| YAL051W | OAF1    | YER088C   | DOT6    | 0.1365 | 0.0296  |
| YDR064W | RPS13   | YGL226C-A | OST5    | 0.1365 | 0.0532  |
| YER185W | PUG1    | YPL144W   | POC4    | 0.1363 | -0.1705 |
| YAL051W | OAF1    | YGL051W   | MST27   | 0.1362 | -0.0251 |
| YBR161W | CSH1    | YJR025C   | BNA1    | 0.1360 | -0.0001 |
| YCL024W | KCC4    | YLR047C   | FRE8    | 0.1357 | 0.0026  |
| YER144C | UBP5    | YHR050W   | SMF2    | 0.1352 | 0.0185  |
| YBR229C | ROT2    | YJR008W   | MHO1    | 0.1346 | -0.0563 |
| YDR528W | HLR1    | YPL001W   | HAT1    | 0.1346 | 0.0897  |

|           |         |           |         |        |         |
|-----------|---------|-----------|---------|--------|---------|
| YER116C   | SLX8    | YOL073C   | DSC2    | 0.1342 | 0.0006  |
| YJL187C   | SWE1    | YBR071W   | YBR071W | 0.1341 | 0.0366  |
| YCL026C-A | FRM2    | YGR152C   | RSR1    | 0.1337 | -0.0748 |
| YDR319C   | YFT2    | YGL226C-A | OST5    | 0.1336 | 0.0416  |
| YDR515W   | SLF1    | YIL142W   | CCT2    | 0.1333 | 0.0085  |
| YMR215W   | GAS3    | YER116C   | SLX8    | 0.1329 | -0.2465 |
| YAL051W   | OAF1    | YPL016W   | SWI1    | 0.1328 | 0.0328  |
| YBL017C   | PEP1    | YJL140W   | RPB4    | 0.1328 | -0.0623 |
| YBL020W   | RFT1    | YDR515W   | SLF1    | 0.1327 | 0.0012  |
| YFR011C   | MIC19   | YGL035C   | MIG1    | 0.1326 | 0.0686  |
| YIL158W   | AIM20   | YJL036W   | SNX4    | 0.1322 | 0.0272  |
| YOR054C   | VHS3    | YFR013W   | IOC3    | 0.1320 | 0.1294  |
| YDL155W   | CLB3    | YHL048W   | COS8    | 0.1318 | -0.0468 |
| YDR180W   | SCC2    | YHR023W   | MYO1    | 0.1318 | 0.0158  |
| YBR225W   | YBR225W | YMR112C   | MED11   | 0.1315 | -0.1435 |
| YJL058C   | BIT61   | YDL002C   | NHP10   | 0.1312 | -0.0424 |
| YNL024C   | EFM6    | YBR071W   | YBR071W | 0.1310 | -0.0468 |
| YBL014C   | RRN6    | YPL144W   | POC4    | 0.1309 | 0.1464  |
| YPL234C   | VMA11   | YDR144C   | MKC7    | 0.1306 | -0.0149 |
| YOR051C   | ETT1    | YLR449W   | FPR4    | 0.1305 | 0.0230  |
| YJR056C   | YJR056C | YHR027C   | RPN1    | 0.1303 | -0.0011 |
| YAL051W   | OAF1    | YJR032W   | CPR7    | 0.1296 | -0.0673 |
| YEL055C   | POL5    | YOL164W   | BDS1    | 0.1296 | -0.0630 |
| YDL164C   | CDC9    | YBR008C   | FLR1    | 0.1289 | 0.0318  |
| YDL002C   | NHP10   | YLR430W   | SEN1    | 0.1286 | -0.1051 |
| YOL113W   | SKM1    | YGL025C   | PGD1    | 0.1284 | 0.1718  |
| YMR046C   | YMR046C | YFL047W   | RGD2    | 0.1283 | 0.0105  |
| YLR248W   | RCK2    | YNL138W   | SRV2    | 0.1280 | 0.0079  |
| YLL040C   | VPS13   | YDL217C   | TIM22   | 0.1279 | -0.0269 |
| YGL201C   | MCM6    | YML048W   | GSF2    | 0.1278 | -0.0371 |
| YJL163C   | YJL163C | YNL329C   | PEX6    | 0.1278 | -0.0787 |
| YKR051W   | YKR051W | YOL147C   | PEX11   | 0.1278 | -0.1325 |
| YOR092W   | ECM3    | YDR383C   | NKP1    | 0.1277 | 0.0022  |
| YFR042W   | KEG1    | YLR180W   | SAM1    | 0.1272 | -0.0248 |
| YFL018C   | LPD1    | YKL092C   | BUD2    | 0.1271 | 0.1030  |
| YLR342W   | FKS1    | YOR131C   | YOR131C | 0.1271 | -0.0985 |
| YFR047C   | BNA6    | YDR180W   | SCC2    | 0.1270 | -0.0928 |
| YMR067C   | UBX4    | YER116C   | SLX8    | 0.1269 | -0.1169 |
| YNL135C   | FPR1    | YLR172C   | DPH5    | 0.1269 | 0.0243  |
| YBR222C   | PCS60   | YDL167C   | NRP1    | 0.1267 | -0.1058 |
| YBR154C   | RPB5    | YOR144C   | ELG1    | 0.1266 | 0.0077  |
| YPL012W   | RRP12   | YLR096W   | KIN2    | 0.1266 | 0.1889  |
| YGL017W   | ATE1    | YDL103C   | QRI1    | 0.1265 | 0.0357  |
| YFR013W   | IOC3    | YMR123W   | PKR1    | 0.1261 | -0.0177 |
| YBL079W   | NUP170  | YFR004W   | RPN11   | 0.1259 | 0.0498  |
| YGR157W   | CHO2    | YLR257W   | YLR257W | 0.1259 | 0.0261  |
| YBR225W   | YBR225W | YJR097W   | JJJ3    | 0.1258 | -0.2587 |

|         |         |         |         |        |         |
|---------|---------|---------|---------|--------|---------|
| YOL018C | TLG2    | YFR013W | IOC3    | 0.1254 | 0.0426  |
| YDL147W | RPN5    | YBR225W | YBR225W | 0.1253 | -0.0023 |
| YPL001W | HAT1    | YJL158C | CIS3    | 0.1252 | 0.0159  |
| YBL079W | NUP170  | YBR069C | TAT1    | 0.1248 | 0.3095  |
| YGL207W | SPT16   | YIL009W | FAA3    | 0.1248 | 0.0265  |
| YNL215W | IES2    | YML036W | CGI121  | 0.1246 | -0.0608 |
| YBR087W | RFC5    | YOR371C | GPB1    | 0.1245 | -0.0939 |
| YML098W | TAF13   | YBR069C | TAT1    | 0.1245 | 0.0562  |
| YDR144C | MKC7    | YIR026C | YVH1    | 0.1244 | 0.0697  |
| YLR442C | SIR3    | YKL125W | RRN3    | 0.1244 | 0.0093  |
| YPL071C | YPL071C | YDR497C | ITR1    | 0.1243 | 0.0204  |
| YDR524C | AGE1    | YKR051W | YKR051W | 0.1242 | 0.0042  |
| YPL233W | NSL1    | YER116C | SLX8    | 0.1242 | 0.0447  |
| YDL103C | QRI1    | YGR158C | MTR3    | 0.1240 | -0.0057 |
| YDL150W | RPC53   | YJR036C | HUL4    | 0.1239 | -0.1303 |
| YHR016C | YSC84   | YLR248W | RCK2    | 0.1239 | 0.1196  |
| YJL178C | ATG27   | YML016C | PPZ1    | 0.1238 | -0.0506 |
| YKL160W | ELF1    | YNL329C | PEX6    | 0.1238 | -0.0263 |
| YHR209W | CRG1    | YBR071W | YBR071W | 0.1237 | 0.0776  |
| YAL009W | SPO7    | YOR088W | YOR088W | 0.1236 | -0.0319 |
| YHR039C | MSC7    | YGR258C | RAD2    | 0.1234 | -0.0688 |
| YOR131C | YOR131C | YGR001C | EFM5    | 0.1234 | 0.0816  |
| YML007W | YAP1    | YIL066C | RNR3    | 0.1230 | 0.0208  |
| YMR215W | GAS3    | YCR031C | RPS14a  | 0.1230 | 0.0226  |
| YGL226W | MTC3    | YIL166C | YIL166C | 0.1229 | -0.0784 |
| YBR037C | SCO1    | YNL041C | COG6    | 0.1228 | -0.0173 |
| YBL029W | YBL029W | YPL058C | PDR12   | 0.1226 | 0.0448  |
| YBL030C | PET9    | YEL071W | DLD3    | 0.1225 | -0.0522 |
| YJR068W | RFC2    | YHR063C | PAN5    | 0.1225 | 0.0297  |
| YEL058W | PCM1    | YBR229C | ROT2    | 0.1223 | -0.0281 |
| YLL061W | MMP1    | YJL163C | YJL163C | 0.1222 | -0.0299 |
| YBL040C | ERD2    | YOL088C | MPD2    | 0.1219 | -0.0547 |
| YJL140W | RPB4    | YBR061C | TRM7    | 0.1219 | -0.0046 |
| YGL004C | RPN14   | YKR080W | MTD1    | 0.1218 | 0.0005  |
| YLR368W | MDM30   | YMR046C | YMR046C | 0.1217 | 0.0832  |
| YER023W | PRO3    | YOR142W | LSC1    | 0.1216 | 0.0211  |
| YKL184W | SPE1    | YDR441C | APT2    | 0.1211 | 0.0364  |
| YKL073W | LHS1    | YDL167C | NRP1    | 0.1211 | -0.0244 |
| YPL001W | HAT1    | YLR342W | FKS1    | 0.1211 | 0.0114  |
| YKL184W | SPE1    | YDR351W | SBE2    | 0.1210 | 0.0806  |
| YKL125W | RRN3    | YER023W | PRO3    | 0.1209 | -0.0331 |
| YJL178C | ATG27   | YAL009W | SPO7    | 0.1207 | 0.0471  |
| YMR112C | MED11   | YLR375W | STP3    | 0.1207 | -0.0403 |
| YDL164C | CDC9    | YER144C | UBP5    | 0.1205 | -0.0323 |
| YNL280C | ERG24   | YLR443W | ECM7    | 0.1200 | 0.1108  |
| YGL004C | RPN14   | YLL024C | SSA2    | 0.1198 | -0.0668 |
| YGR184C | UBR1    | YLR455W | PDP3    | 0.1189 | -0.0181 |

|           |         |         |         |        |         |
|-----------|---------|---------|---------|--------|---------|
| YDL150W   | RPC53   | YCL009C | ILV6    | 0.1187 | -0.0327 |
| YPL016W   | SWI1    | YCL024W | KCC4    | 0.1185 | 0.0279  |
| YJL187C   | SWE1    | YFR047C | BNA6    | 0.1182 | -0.1002 |
| YJL183W   | MNN11   | YIL061C | SNP1    | 0.1180 | -0.0757 |
| YIL133C   | RPL16a  | YAL056W | GPB2    | 0.1178 | -0.1246 |
| YGR168C   | YGR168C | YOL164W | BDS1    | 0.1176 | -0.0045 |
| YGR194C   | XKS1    | YBR037C | SCO1    | 0.1176 | 0.0561  |
| YHR027C   | RPN1    | YER144C | UBP5    | 0.1172 | -0.0792 |
| YLR330W   | CHS5    | YML007W | YAP1    | 0.1171 | -0.0065 |
| YGR149W   | GPC1    | YJL178C | ATG27   | 0.1167 | 0.0502  |
| YML096W   | YML096W | YDL217C | TIM22   | 0.1166 | 0.0082  |
| YDR351W   | SBE2    | YDR180W | SCC2    | 0.1162 | 0.0094  |
| YPL016W   | SWI1    | YDR319C | YFT2    | 0.1161 | -0.0430 |
| YDL150W   | RPC53   | YGR258C | RAD2    | 0.1160 | -0.0063 |
| YJR073C   | OPI3    | YER049W | TPA1    | 0.1159 | -0.0427 |
| YLL024C   | SSA2    | YDR351W | SBE2    | 0.1158 | -0.0276 |
| YHR209W   | CRG1    | YLR047C | FRE8    | 0.1153 | -0.0869 |
| YGR208W   | SER2    | YGL176C | YGL176C | 0.1152 | 0.0671  |
| YHR027C   | RPN1    | YDR144C | MKC7    | 0.1148 | 0.0362  |
| YEL076W-C | Unknown | YOL092W | YPQ1    | 0.1145 | -0.0026 |
| YDR531W   | CAB1    | YOL092W | YPQ1    | 0.1144 | 0.0219  |
| YNR034W   | SOL1    | YLR342W | FKS1    | 0.1144 | -0.0035 |
| YMR115W   | MGR3    | YJL047C | RTT101  | 0.1141 | 0.1423  |
| YCR041W   | YCR041W | YDL167C | NRP1    | 0.1140 | -0.0444 |
| YOL073C   | DSC2    | YOR264W | DSE3    | 0.1140 | -0.1088 |
| YBR132C   | AGP2    | YOR092W | ECM3    | 0.1136 | 0.0210  |
| YGR207C   | CIR1    | YOL088C | MPD2    | 0.1136 | -0.0524 |
| YGL226C-A | OST5    | YNL280C | ERG24   | 0.1135 | 0.0096  |
| YIL166C   | YIL166C | YMR112C | MED11   | 0.1135 | -0.0699 |
| YML072C   | TCB3    | YKL067W | YNK1    | 0.1135 | -0.0296 |
| YIL133C   | RPL16a  | YGR001C | EFM5    | 0.1127 | 0.2798  |
| YGR157W   | CHO2    | YGL242C | YGL242C | 0.1123 | 0.1404  |
| YER046W   | SPO73   | YML016C | PPZ1    | 0.1122 | -0.0299 |
| YDL002C   | NHP10   | YBR239C | ERT1    | 0.1121 | -0.1387 |
| YOL164W   | BDS1    | YOL147C | PEX11   | 0.1120 | 0.0199  |
| YDR441C   | APT2    | YBR069C | TAT1    | 0.1117 | 0.0023  |
| YIR028W   | DAL4    | YPL144W | POC4    | 0.1116 | -0.1103 |
| YPL144W   | POC4    | YOR264W | DSE3    | 0.1111 | 0.1055  |
| YLR206W   | ENT2    | YDL047W | SIT4    | 0.1106 | 0.0181  |
| YDL089W   | NUR1    | YDL150W | RPC53   | 0.1102 | 0.0138  |
| YPR196W   | YPR196W | YGR149W | GPC1    | 0.1098 | -0.0042 |
| YLR375W   | STP3    | YFR013W | IOC3    | 0.1097 | -0.0181 |
| YBR193C   | MED8    | YOL147C | PEX11   | 0.1094 | -0.0610 |
| YER023W   | PRO3    | YDL164C | CDC9    | 0.1086 | 0.0507  |
| YDR321W   | ASP1    | YOR264W | DSE3    | 0.1085 | 0.1117  |
| YGR157W   | CHO2    | YLR046C | YLR046C | 0.1085 | 0.0108  |
| YCR071C   | IMG2    | YIL009W | FAA3    | 0.1084 | -0.0110 |



|         |         |         |         |        |         |
|---------|---------|---------|---------|--------|---------|
| YHL007C | STE20   | YOR051C | ETT1    | 0.1083 | 0.0014  |
| YEL058W | PCM1    | YLR426W | TDA5    | 0.1080 | 0.0985  |
| YLL035W | GRC3    | YFR037C | RSC8    | 0.1080 | -0.0039 |
| YLR342W | FKS1    | YML110C | COQ5    | 0.1079 | -0.0319 |
| YCL018W | LEU2    | YBR071W | YBR071W | 0.1078 | -0.0197 |
| YLR449W | FPR4    | YLR430W | SEN1    | 0.1076 | 0.0407  |
| YML110C | COQ5    | YLR455W | PDP3    | 0.1076 | 0.0355  |
| YDR178W | SDH4    | YPL001W | HAT1    | 0.1064 | -0.0957 |
| YHR039C | MSC7    | YER023W | PRO3    | 0.1061 | 0.0076  |
| YJL047C | RTT101  | YJL212C | OPT1    | 0.1060 | -0.0155 |
| YKR080W | MTD1    | YOR196C | LIP5    | 0.1058 | -0.0344 |
| YLR368W | MDM30   | YHR063C | PAN5    | 0.1057 | 0.0018  |
| YLR455W | PDP3    | YDR420W | HKR1    | 0.1057 | 0.0670  |
| YHR063C | PAN5    | YML091C | RPM2    | 0.1053 | -0.1217 |
| YLR455W | PDP3    | YOR088W | YOR088W | 0.1050 | -0.1298 |
| YDR351W | SBE2    | YDL132W | CDC53   | 0.1049 | 0.1293  |
| YLR389C | STE23   | YOR131C | YOR131C | 0.1044 | -0.0017 |
| YGL017W | ATE1    | YJR073C | OPI3    | 0.1043 | 0.0066  |
| YER020W | GPA2    | YHR063C | PAN5    | 0.1042 | -0.0306 |
| YOR043W | WHI2    | YBR069C | TAT1    | 0.1042 | -0.1112 |
| YER185W | PUG1    | YDR420W | HKR1    | 0.1040 | -0.0811 |
| YJR032W | CPR7    | YPL144W | POC4    | 0.1037 | 0.0951  |
| YJL204C | RCY1    | YOR088W | YOR088W | 0.1035 | 0.1288  |
| YLR258W | GSY2    | YER144C | UBP5    | 0.1034 | 0.1149  |
| YLR231C | BNA5    | YMR112C | MED11   | 0.1033 | 0.1143  |
| YGL178W | MPT5    | YDL002C | NHP10   | 0.1032 | -0.0272 |
| YLR287C | YLR287C | YOR051C | ETT1    | 0.1031 | 0.1089  |
| YPR080W | TEF1    | YOL026C | MIM1    | 0.1028 | 0.0010  |
| YAL056W | GPB2    | YDL150W | RPC53   | 0.1027 | -0.0465 |
| YHR016C | YSC84   | YML036W | CGI121  | 0.1026 | -0.0583 |
| YJL126W | NIT2    | YHR027C | RPN1    | 0.1024 | -0.0074 |
| YMR046C | YMR046C | YJL140W | RPB4    | 0.1023 | -0.0303 |
| YDL135C | RDI1    | YLL035W | GRC3    | 0.1019 | 0.0552  |
| YML110C | COQ5    | YDR420W | HKR1    | 0.1010 | -0.1156 |
| YOL093W | TRM10   | YML071C | COG8    | 0.1009 | 0.0454  |
| YJL047C | RTT101  | YBR071W | YBR071W | 0.1006 | -0.0623 |
| YOL089C | HAL9    | YDR319C | YFT2    | 0.1003 | -0.0038 |
| YDR528W | HLR1    | YOL147C | PEX11   | 0.1001 | -0.0095 |
| YJL051W | IRC8    | YLR442C | SIR3    | 0.1001 | -0.0068 |
| YJL126W | NIT2    | YIL043C | CBR1    | 0.1000 | -0.0329 |
| YFR047C | BNA6    | YJR032W | CPR7    | 0.0999 | -0.1186 |
| YMR115W | MGR3    | YBR037C | SCO1    | 0.0999 | -0.0417 |
| YJR056C | YJR056C | YML036W | CGI121  | 0.0997 | 0.0327  |
| YHL048W | COS8    | YJL036W | SNX4    | 0.0994 | 0.0164  |
| YOR101W | RAS1    | YMR209C | YMR209C | 0.0993 | -0.0085 |
| YML013W | UBX2    | YHR063C | PAN5    | 0.0992 | -0.0644 |
| YIL089W | YIL089W | YML110C | COQ5    | 0.0991 | -0.0198 |

|           |           |         |         |        |         |
|-----------|-----------|---------|---------|--------|---------|
| YKL116C   | PRR1      | YJL051W | IRC8    | 0.0991 | 0.0098  |
| YML091C   | RPM2      | YMR112C | MED11   | 0.0988 | 0.0566  |
| YLR257W   | YLR257W   | YGR150C | CCM1    | 0.0987 | 0.0102  |
| YLR443W   | ECM7      | YOL147C | PEX11   | 0.0986 | 0.0634  |
| YNL326C   | PFA3      | YOL073C | DSC2    | 0.0984 | -0.0190 |
| YBR132C   | AGP2      | YDR420W | HKR1    | 0.0979 | -0.0167 |
| YIL111W   | COX5b     | YCR031C | RPS14a  | 0.0979 | -0.0681 |
| YMR062C   | ARG7      | YMR112C | MED11   | 0.0978 | -0.0103 |
| YFL016C   | MDJ1      | YDR515W | SLF1    | 0.0977 | 0.0867  |
| YOR142W   | LSC1      | YGR152C | RSR1    | 0.0974 | -0.1082 |
| YIL015C-A | YIL015C-A | YOL088C | MPD2    | 0.0973 | 0.0633  |
| YOR389W   | YOR389W   | YDR515W | SLF1    | 0.0973 | 0.0070  |
| YFL049W   | SWP82     | YIL043C | CBR1    | 0.0972 | -0.0058 |
| YGL053W   | PRM8      | YLR047C | FRE8    | 0.0972 | -0.0381 |
| YOL147C   | PEX11     | YOL026C | MIM1    | 0.0970 | -0.0567 |
| YCL009C   | ILV6      | YML048W | GSF2    | 0.0968 | 0.0254  |
| YJR056C   | YJR056C   | YOR092W | ECM3    | 0.0965 | 0.0298  |
| YOR127W   | RGA1      | YOR264W | DSE3    | 0.0962 | -0.0052 |
| YHR063C   | PAN5      | YNL135C | FPR1    | 0.0961 | -0.0350 |
| YOL018C   | TLG2      | YMR209C | YMR209C | 0.0960 | -0.0472 |
| YAL056W   | GPB2      | YOL092W | YPQ1    | 0.0957 | 0.0387  |
| YIL119C   | RPI1      | YDR515W | SLF1    | 0.0956 | 0.0010  |
| YCL039W   | GID7      | YDL103C | QRI1    | 0.0953 | 0.0017  |
| YMR192W   | GYL1      | YPL144W | POC4    | 0.0953 | 0.0470  |
| YLR057W   | MNL2      | YOL130W | ALR1    | 0.0952 | 0.0858  |
| YIL165C   | YIL165C   | YGR152C | RSR1    | 0.0951 | -0.0485 |
| YKL184W   | SPE1      | YJR032W | CPR7    | 0.0951 | 0.1620  |
| YCR041W   | YCR041W   | YOL147C | PEX11   | 0.0949 | 0.0900  |
| YDR058C   | TGL2      | YBR168W | PEX32   | 0.0942 | -0.1533 |
| YPL226W   | NEW1      | YOR033C | EXO1    | 0.0942 | 0.0507  |
| YLL035W   | GRC3      | YER186C | YER186C | 0.0941 | -0.0218 |
| YDL147W   | RPN5      | YML036W | CGI121  | 0.0937 | -0.0182 |
| YOL026C   | MIM1      | YFR004W | RPN11   | 0.0934 | 0.0053  |
| YBL089W   | AVT5      | YHR063C | PAN5    | 0.0928 | -0.0334 |
| YBR077C   | SLM4      | YDL047W | SIT4    | 0.0928 | -0.0458 |
| YGR168C   | YGR168C   | YOR092W | ECM3    | 0.0926 | 0.0054  |
| YJL051W   | IRC8      | YGL176C | YGL176C | 0.0925 | 0.0699  |
| YKL021C   | MAK11     | YOL153C | YOL153C | 0.0924 | -0.0588 |
| YDR339C   | FCF1      | YGR006W | PRP18   | 0.0923 | -0.1952 |
| YML110C   | COQ5      | YJL163C | YJL163C | 0.0921 | 0.0302  |
| YHL048W   | COS8      | YOR088W | YOR088W | 0.0916 | -0.0891 |
| YFR013W   | IOC3      | YHR050W | SMF2    | 0.0915 | -0.0098 |
| YGR207C   | CIR1      | YJL171C | TOH1    | 0.0911 | 0.0709  |
| YOL092W   | YPQ1      | YLL035W | GRC3    | 0.0911 | 0.0259  |
| YMR112C   | MED11     | YMR158W | MRPS8   | 0.0909 | 0.0091  |
| YFR047C   | BNA6      | YBR196C | PGI1    | 0.0908 | 0.0115  |
| YML071C   | COG8      | YBR071W | YBR071W | 0.0908 | 0.0785  |

|         |         |         |        |        |         |
|---------|---------|---------|--------|--------|---------|
| YNL022C | RCM1    | YER026C | CHO1   | 0.0903 | -0.0926 |
| YER185W | PUG1    | YLR047C | FRE8   | 0.0900 | -0.0021 |
| YLR231C | BNA5    | YBR008C | FLR1   | 0.0899 | -0.0496 |
| YLR206W | ENT2    | YOL147C | PEX11  | 0.0897 | -0.0070 |
| YIL066C | RNR3    | YPL144W | POC4   | 0.0894 | -0.0395 |
| YBR121C | GRS1    | YJR086W | STE18  | 0.0893 | -0.1601 |
| YIL043C | CBR1    | YDR420W | HKR1   | 0.0893 | 0.0241  |
| YFR047C | BNA6    | YHL007C | STE20  | 0.0887 | 0.0811  |
| YDR144C | MKC7    | YDR420W | HKR1   | 0.0886 | 0.2183  |
| YGR194C | XKS1    | YDR497C | ITR1   | 0.0883 | -0.0384 |
| YGR289C | MAL11   | YDL217C | TIM22  | 0.0880 | -0.0699 |
| YNL200C | NNR1    | YGR258C | RAD2   | 0.0879 | 0.1649  |
| YPL237W | SUI3    | YLR237W | THI7   | 0.0876 | -0.0987 |
| YHR054C | YHR054C | YHR027C | RPN1   | 0.0873 | -0.0351 |
| YFR037C | RSC8    | YER116C | SLX8   | 0.0861 | 0.0583  |
| YOR080W | DIA2    | YHL007C | STE20  | 0.0859 | 0.0293  |
| YKL125W | RRN3    | YDR530C | APA2   | 0.0852 | -0.1170 |
| YLL024C | SSA2    | YGR194C | XKS1   | 0.0851 | 0.0000  |
| YIL111W | COX5b   | YOL147C | PEX11  | 0.0847 | 0.0204  |
| YOR144C | ELG1    | YHR043C | DOG2   | 0.0839 | -0.2641 |
| YFR042W | KEG1    | YOL088C | MPD2   | 0.0829 | 0.0325  |
| YDR530C | APA2    | YMR112C | MED11  | 0.0822 | -0.0992 |
| YFL056C | AAD6    | YPL001W | HAT1   | 0.0822 | -0.0385 |
| YFL018C | LPD1    | YGL051W | MST27  | 0.0822 | -0.0203 |
| YBR067C | TIP1    | YKL184W | SPE1   | 0.0818 | 0.0307  |
| YBR037C | SCO1    | YKL073W | LHS1   | 0.0815 | -0.0213 |
| YNR036C | MRPS12  | YMR192W | GYL1   | 0.0815 | -0.2706 |
| YJR068W | RFC2    | YML036W | CGI121 | 0.0814 | -0.1064 |
| YBR037C | SCO1    | YOR371C | GPB1   | 0.0812 | -0.0067 |
| YKL110C | KTI12   | YGL051W | MST27  | 0.0807 | 0.0463  |
| YMR192W | GYL1    | YDL002C | NHP10  | 0.0805 | 0.0506  |
| YBR067C | TIP1    | YDL164C | CDC9   | 0.0802 | -0.0096 |
| YKL021C | MAK11   | YJR097W | JJJ3   | 0.0795 | 0.0573  |
| YNL138W | SRV2    | YLL035W | GRC3   | 0.0795 | -0.0022 |
| YGR194C | XKS1    | YDR530C | APA2   | 0.0792 | 0.0959  |
| YIL112W | HOS4    | YDR420W | HKR1   | 0.0791 | 0.0026  |
| YIR026C | YVH1    | YDR441C | APT2   | 0.0791 | 0.0370  |
| YNL046W | YNL046W | YDL103C | QRI1   | 0.0789 | 0.0305  |
| YOR371C | GPB1    | YDL167C | NRP1   | 0.0788 | -0.0333 |
| YML036W | CGI121  | YPL009C | RQC2   | 0.0784 | 0.0439  |
| YNL242W | ATG2    | YDR420W | HKR1   | 0.0782 | 0.0942  |
| YAL051W | OAF1    | YDR319C | YFT2   | 0.0778 | -0.0493 |
| YMR046C | YMR046C | YLR342W | FKS1   | 0.0778 | -0.0001 |
| YBR067C | TIP1    | YLR180W | SAM1   | 0.0776 | -0.0315 |
| YOR251C | TUM1    | YGL051W | MST27  | 0.0775 | -0.0921 |
| YPR022C | SDD4    | YIL009W | FAA3   | 0.0775 | 0.0121  |
| YJL051W | IRC8    | YNL138W | SRV2   | 0.0771 | 0.0887  |

|         |         |         |         |        |         |
|---------|---------|---------|---------|--------|---------|
| YJL187C | SWE1    | YBL029W | YBL029W | 0.0765 | -0.0384 |
| YOL089C | HAL9    | YKL184W | SPE1    | 0.0765 | 0.0316  |
| YDL164C | CDC9    | YLL035W | GRC3    | 0.0760 | 0.0548  |
| YDL164C | CDC9    | YHR027C | RPN1    | 0.0759 | 0.1641  |
| YGR207C | CIR1    | YBR239C | ERT1    | 0.0756 | -0.0299 |
| YEL058W | PCM1    | YDL217C | TIM22   | 0.0753 | -0.0607 |
| YKR085C | MRPL20  | YML091C | RPM2    | 0.0753 | 0.0561  |
| YGL192W | IME4    | YER186C | YER186C | 0.0751 | 0.0382  |
| YOL153C | YOL153C | YJL212C | OPT1    | 0.0748 | 0.1298  |
| YHR209W | CRG1    | YML036W | CGI121  | 0.0744 | -0.0017 |
| YLR258W | GSY2    | YDR319C | YFT2    | 0.0742 | -0.0236 |
| YDR178W | SDH4    | YDR144C | MKC7    | 0.0741 | -0.0921 |
| YER020W | GPA2    | YDR515W | SLF1    | 0.0738 | -0.1029 |
| YKL021C | MAK11   | YDL211C | YDL211C | 0.0737 | 0.0035  |
| YJL036W | SNX4    | YIL066C | RNR3    | 0.0736 | -0.0002 |
| YOR142W | LSC1    | YDL164C | CDC9    | 0.0729 | -0.0781 |
| YNL200C | NNR1    | YCR083W | TRX3    | 0.0726 | 0.1043  |
| YBL020W | RFT1    | YLL035W | GRC3    | 0.0722 | 0.0645  |
| YDL135C | RDI1    | YJL163C | YJL163C | 0.0721 | 0.0026  |
| YBL017C | PEP1    | YDL217C | TIM22   | 0.0719 | -0.0435 |
| YMR209C | YMR209C | YDR515W | SLF1    | 0.0717 | -0.0068 |
| YCR071C | IMG2    | YBR071W | YBR071W | 0.0710 | 0.1074  |
| YGL017W | ATE1    | YFR004W | RPN11   | 0.0708 | -0.0012 |
| YOR127W | RGA1    | YDR515W | SLF1    | 0.0708 | -0.0539 |
| YJL126W | NIT2    | YNL138W | SRV2    | 0.0706 | -0.0772 |
| YPL234C | VMA11   | YMR067C | UBX4    | 0.0701 | -0.0294 |
| YML071C | COG8    | YDR367W | KEI1    | 0.0693 | -0.0469 |
| YGR288W | MAL13   | YGR211W | ZPR1    | 0.0692 | -0.0094 |
| YEL068C | YEL068C | YER116C | SLX8    | 0.0691 | 0.0386  |
| YGL208W | SIP2    | YER144C | UBP5    | 0.0687 | 0.0099  |
| YGR194C | XKS1    | YJL051W | IRC8    | 0.0687 | 0.1019  |
| YJR084W | YJR084W | YGR150C | CCM1    | 0.0687 | -0.0176 |
| YGR258C | RAD2    | YIL009W | FAA3    | 0.0683 | 0.0924  |
| YKR080W | MTD1    | YDL002C | NHP10   | 0.0682 | 0.0421  |
| YPL001W | HAT1    | YJR032W | CPR7    | 0.0679 | 0.0575  |
| YKL067W | YNK1    | YER026C | CHO1    | 0.0678 | 0.0258  |
| YDR441C | APT2    | YMR067C | UBX4    | 0.0677 | -0.0122 |
| YLR237W | THI7    | YDR319C | YFT2    | 0.0668 | 0.0268  |
| YCR071C | IMG2    | YLR172C | DPH5    | 0.0662 | -0.0170 |
| YBR274W | CHK1    | YML110C | COQ5    | 0.0661 | 0.0358  |
| YIL046W | MET30   | YFR013W | IOC3    | 0.0660 | -0.0281 |
| YLR046C | YLR046C | YGL051W | MST27   | 0.0647 | 0.0532  |
| YJL208C | NUC1    | YOL026C | MIM1    | 0.0645 | 0.0887  |
| YPL237W | SUI3    | YLR176C | RFX1    | 0.0642 | -0.0164 |
| YDL227C | Ho      | YIL009W | FAA3    | 0.0640 | 0.0314  |
| YOR142W | LSC1    | YHR063C | PAN5    | 0.0623 | 0.0005  |
| YHR104W | GRE3    | YGR149W | GPC1    | 0.0618 | 0.0157  |

|         |         |         |       |        |         |
|---------|---------|---------|-------|--------|---------|
| YNL124W | NAF1    | YHR027C | RPN1  | 0.0618 | -0.0229 |
| YJL171C | TOH1    | YNL124W | NAF1  | 0.0616 | 0.0321  |
| YPL233W | NSL1    | YDR531W | CAB1  | 0.0616 | -0.0018 |
| YKR085C | MRPL20  | YDL047W | SIT4  | 0.0613 | -0.0007 |
| YBR168W | PEX32   | YGR194C | XKS1  | 0.0611 | -0.0150 |
| YMR010W | ANY1    | YJL051W | IRC8  | 0.0606 | -0.0072 |
| YBL030C | PET9    | YDR351W | SBE2  | 0.0604 | 0.0208  |
| YBR161W | CSH1    | YLL035W | GRC3  | 0.0602 | -0.0942 |
| YNL024C | EFM6    | YOL147C | PEX11 | 0.0595 | -0.0039 |
| YJL178C | ATG27   | YER182W | FMP10 | 0.0593 | -0.0371 |
| YBR077C | SLM4    | YIL009W | FAA3  | 0.0583 | -0.0352 |
| YLR442C | SIR3    | YDR180W | SCC2  | 0.0583 | 0.0476  |
| YDR513W | GRX2    | YDL047W | SIT4  | 0.0582 | 0.0282  |
| YIR022W | SEC11   | YDR351W | SBE2  | 0.0580 | 0.0251  |
| YBR163W | EXO5    | YDL217C | TIM22 | 0.0578 | -0.0023 |
| YGL208W | SIP2    | YBR069C | TAT1  | 0.0573 | 0.0725  |
| YLR435W | TSR2    | YBR087W | RFC5  | 0.0565 | -0.0079 |
| YDR058C | TGL2    | YIL112W | HOS4  | 0.0561 | 0.0033  |
| YGL208W | SIP2    | YLL035W | GRC3  | 0.0550 | -0.0885 |
| YDL147W | RPN5    | YDR319C | YFT2  | 0.0545 | 0.1166  |
| YMR046C | YMR046C | YDR144C | MKC7  | 0.0539 | -0.0462 |
| YGR028W | MSP1    | YHR027C | RPN1  | 0.0534 | -0.0507 |
| YML071C | COG8    | YBR168W | PEX32 | 0.0534 | 0.0016  |
| YOL097C | WRS1    | YPL001W | HAT1  | 0.0534 | 0.2336  |
| YBR071W | YBR071W | YDL150W | RPC53 | 0.0529 | 0.0209  |
| YMR209C | YMR209C | YGR150C | CCM1  | 0.0521 | -0.0285 |
| YBR249C | ARO4    | YER144C | UBP5  | 0.0519 | -0.1286 |
| YJR040W | GEF1    | YER116C | SLX8  | 0.0519 | -0.0285 |
| YDL164C | CDC9    | YDR319C | YFT2  | 0.0517 | 0.1662  |
| YKL184W | SPE1    | YIL066C | RNR3  | 0.0513 | 0.0304  |
| YOL147C | PEX11   | YKL184W | SPE1  | 0.0511 | 0.0425  |
| YOR127W | RGA1    | YMR112C | MED11 | 0.0504 | -0.0492 |
| YMR062C | ARG7    | YDL150W | RPC53 | 0.0495 | -0.0078 |
| YOR043W | WHI2    | YGL051W | MST27 | 0.0489 | 0.0473  |
| YOL113W | SKM1    | YOR264W | DSE3  | 0.0486 | -0.0731 |
| YGR023W | MTL1    | YFR013W | IOC3  | 0.0482 | 0.0146  |
| YIL133C | RPL16a  | YGR184C | UBR1  | 0.0479 | -0.0867 |
| YHR016C | YSC84   | YIL142W | CCT2  | 0.0477 | -0.0442 |
| YCR071C | IMG2    | YGR149W | GPC1  | 0.0475 | -0.0259 |
| YCR083W | TRX3    | YNL124W | NAF1  | 0.0473 | -0.0151 |
| YBR225W | YBR225W | YDR531W | CAB1  | 0.0464 | -0.0421 |
| YGR168C | YGR168C | YFR013W | IOC3  | 0.0461 | 0.0251  |
| YJR032W | CPR7    | YER144C | UBP5  | 0.0458 | -0.0100 |
| YOL104C | NDJ1    | YML110C | COQ5  | 0.0454 | -0.0176 |
| YBL017C | PEP1    | YPL001W | HAT1  | 0.0445 | -0.0891 |
| YER186C | YER186C | YOL088C | MPD2  | 0.0441 | 0.1510  |
| YBR069C | TAT1    | YIL009W | FAA3  | 0.0436 | -0.0245 |

|         |         |           |         |        |         |
|---------|---------|-----------|---------|--------|---------|
| YOR033C | EXO1    | YGL051W   | MST27   | 0.0433 | -0.0835 |
| YEL058W | PCM1    | YIL009W   | FAA3    | 0.0432 | 0.0392  |
| YBR157C | ICS2    | YMR215W   | GAS3    | 0.0427 | 0.0013  |
| YLR096W | KIN2    | YFR004W   | RPN11   | 0.0427 | -0.0726 |
| YPL001W | HAT1    | YDR351W   | SBE2    | 0.0425 | 0.0008  |
| YPL064C | CWC27   | YFR013W   | IOC3    | 0.0424 | 0.0267  |
| YDL171C | GLT1    | YMR215W   | GAS3    | 0.0422 | -0.1285 |
| YER022W | SRB4    | YML036W   | CGI121  | 0.0422 | 0.0456  |
| YGL004C | RPN14   | YOR264W   | DSE3    | 0.0411 | 0.0262  |
| YIL165C | YIL165C | YBR069C   | TAT1    | 0.0406 | -0.0395 |
| YCR083W | TRX3    | YOR131C   | YOR131C | 0.0405 | 0.0075  |
| YLL028W | TPO1    | YOL026C   | MIM1    | 0.0397 | -0.1062 |
| YPL237W | SUI3    | YEL020W-A | TIM9    | 0.0396 | 0.0155  |
| YDL171C | GLT1    | YOR088W   | YOR088W | 0.0391 | 0.0321  |
| YGR157W | CHO2    | YOL026C   | MIM1    | 0.0385 | 0.0335  |
| YJR056C | YJR056C | YMR215W   | GAS3    | 0.0384 | -0.0007 |
| YHR027C | RPN1    | YFR013W   | IOC3    | 0.0382 | 0.0016  |
| YJR025C | BNA1    | YHR063C   | PAN5    | 0.0382 | 0.0001  |
| YNL024C | EFM6    | YML036W   | CGI121  | 0.0372 | -0.0125 |
| YOR048C | RAT1    | YDR420W   | HKR1    | 0.0369 | -0.1612 |
| YJR074W | MOG1    | YGR152C   | RSR1    | 0.0340 | -0.0580 |
| YDL116W | NUP84   | YGR149W   | GPC1    | 0.0339 | -0.0141 |
| YML079W | YML079W | YDR515W   | SLF1    | 0.0333 | -0.0486 |
| YLR206W | ENT2    | YIL009W   | FAA3    | 0.0329 | -0.0131 |
| YNL278W | CAF120  | YOL026C   | MIM1    | 0.0328 | -0.0503 |
| YIL171W | YIL171W | YOL147C   | PEX11   | 0.0319 | -0.0306 |
| YLR257W | YLR257W | YOR264W   | DSE3    | 0.0306 | 0.0046  |
| YFR037C | RSC8    | YDR319C   | YFT2    | 0.0294 | -0.0304 |
| YLL040C | VPS13   | YIL009W   | FAA3    | 0.0290 | -0.0311 |
| YDR528W | HLR1    | YBR069C   | TAT1    | 0.0276 | 0.0004  |
| YHR039C | MSC7    | YDL111C   | RRP42   | 0.0264 | 0.0257  |
| YPL234C | VMA11   | YFR013W   | IOC3    | 0.0258 | 0.0333  |
| YJR108W | ABM1    | YER116C   | SLX8    | 0.0251 | 0.0007  |
| YLR257W | YLR257W | YML110C   | COQ5    | 0.0248 | -0.0932 |
| YNR034W | SOL1    | YIL009W   | FAA3    | 0.0247 | 0.0424  |
| YBL007C | SLA1    | YML036W   | CGI121  | 0.0238 | -0.0460 |
| YLR449W | FPR4    | YOL026C   | MIM1    | 0.0226 | 0.1391  |
| YDL217C | TIM22   | YIL009W   | FAA3    | 0.0201 | -0.0628 |
| YLR426W | TDA5    | YDR420W   | HKR1    | 0.0192 | 0.0298  |
| YLL040C | VPS13   | YLR047C   | FRE8    | 0.0184 | 0.0082  |
| YDL089W | NUR1    | YFR013W   | IOC3    | 0.0181 | -0.0312 |
| YGR209C | TRX2    | YIL009W   | FAA3    | 0.0156 | 0.0368  |
| YOL153C | YOL153C | YOR088W   | YOR088W | 0.0104 | 0.0795  |
| YOL153C | YOL153C | YBR071W   | YBR071W | 0.0079 | -0.0950 |
| YGR028W | MSP1    | YDR319C   | YFT2    | 0.0075 | -0.0268 |

**Table S3: List of subnetwork nodes.**

| <b>Subnetwork 1</b> | <b>Subnetwork 2</b> | <b>Subnetwork 3</b> | <b>Subnetwork 4</b> | <b>Subnetwork 5</b> | <b>Subnetwork 6</b> |
|---------------------|---------------------|---------------------|---------------------|---------------------|---------------------|
| MHO1                | NUC1                | RPI1                | PPZ1                | YBR137W             | CCT2                |
| ITR1                | PRO3                | MKC7                | YPL071C             | YMD8                | RPT5                |
| ARG7                | RFT1                | RGD2                | AGP2                | TPS1                | SEN1                |
| YGR012W             | DMA1                | MED11               | PIH1                | XKS1                | RPN1                |
| ILV6                | SLM4                | ATE1                | YHR033W             | PHM8                | RPN5                |
| SPE1                | ROT2                | NUR1                | MTD1                | GRE3                | SPT16               |
| CAB1                | PEP1                | RTC2                | CIS3                | SPI1                | CDC53               |
| LYS14               | TUM1                | TIP1                | ISC1                | YBR071W             | RPN6                |
| SDH4                | SLA1                | SST2                | YNL046W             | YBR225W             | SMF2                |
| RPB4                | GRS1                | HOS4                | YAP1                | YNL200C             |                     |
| CIR1                | IMG2                | ICS2                | DSE3                |                     |                     |
| ARO4                | MRPS8               | YML096W             | COX5b               |                     |                     |
| YIL165C             | PGI1                | BNA6                | KRE1                |                     |                     |
| FCF1                | PRM8                | BNA5                | URA8                |                     |                     |
| YOR131C             | PCS60               | BNA1                | MLF3                |                     |                     |
| AIM13               | IME4                | ECM3                | EDC2                |                     |                     |
| OPI3                | MDJ1                |                     |                     |                     |                     |
| YHI9                | FMP10               |                     |                     |                     |                     |
| RSC8                | FLR1                |                     |                     |                     |                     |
| DLD3                | SCO1                |                     |                     |                     |                     |
| MOG1                | NUP170              |                     |                     |                     |                     |
| LIP5                | TIM9                |                     |                     |                     |                     |
| LPD1                | MRPL20              |                     |                     |                     |                     |
| MNT2                | SIP2                |                     |                     |                     |                     |
| ERT1                |                     |                     |                     |                     |                     |
| NHP10               |                     |                     |                     |                     |                     |
| CHO1                |                     |                     |                     |                     |                     |
| LEU2                |                     |                     |                     |                     |                     |
| PHO85               |                     |                     |                     |                     |                     |
| PAN5                |                     |                     |                     |                     |                     |
| LSC1                |                     |                     |                     |                     |                     |
| DOG2                |                     |                     |                     |                     |                     |
| THI7                |                     |                     |                     |                     |                     |
| YLR455W             |                     |                     |                     |                     |                     |
| PET9                |                     |                     |                     |                     |                     |
| SBE2                |                     |                     |                     |                     |                     |
| OPT1                |                     |                     |                     |                     |                     |

| <b>Subnetwork 7</b> | <b>Subnetwork 8</b> | <b>Subnetwork 9</b> | <b>Subnetwork 10</b> | <b>Subnetwork 11</b> | <b>Subnetwork 12</b> |
|---------------------|---------------------|---------------------|----------------------|----------------------|----------------------|
| MSP1                | MTR3                | ELF1                | YKR051W              | YJL171C              | KIN2                 |
| YDL211C             | PCM1                | EMC2                | EXO1                 | YCR041W              | RPM2                 |
| LHS1                | MSC7                | UBP5                | SRB4                 | VMA11                | YIL015C-A            |
| YLR257W             | PRR1                | STE18               | AVT2                 | YDR134C              | YMR046C              |
| SNP1                | TAE2                | DIA2                | RNR3                 | PER33                | MIG1                 |
| HLR1                | APM4                | OST5                | ASP3-1               |                      |                      |
| SNX4                | ERG3                | YGL193C             |                      |                      |                      |
| COG8                | ERG24               |                     |                      |                      |                      |



**Table S4: Gene ontology enrichment results using DAVID analysis of subnetworks.****Subnetwork 1**

| Category        | Term                                       | Count | PValue   | Benjamini | FDR      |
|-----------------|--------------------------------------------|-------|----------|-----------|----------|
| GOTERM_BP_FAT   | GO:0009309~amine biosynthetic process      | 7     | 1.23E-04 | 3.99E-02  | 1.66E-01 |
| GOTERM_BP_FAT   | GO:0046394~carboxylic acid biosynthetic pr | 7     | 3.51E-04 | 5.66E-02  | 4.75E-01 |
| GOTERM_BP_FAT   | GO:0016053~organic acid biosynthetic proce | 7     | 3.51E-04 | 5.66E-02  | 4.75E-01 |
| GOTERM_BP_FAT   | GO:0008652~cellular amino acid biosyntheti | 6     | 8.64E-04 | 9.12E-02  | 1.17E+00 |
| SP_PIR_KEYWORDS | amino-acid biosynthesis                    | 5     | 9.77E-04 | 9.22E-02  | 1.08E+00 |
| GOTERM_BP_FAT   | GO:0044271~nitrogen compound biosynthet    | 8     | 1.67E-03 | 1.29E-01  | 2.24E+00 |
| GOTERM_MF_FAT   | GO:0048037~cofactor binding                | 6     | 2.18E-03 | 2.50E-01  | 2.51E+00 |
| GOTERM_CC_FAT   | GO:0009295~nucleoid                        | 3     | 4.75E-03 | 2.90E-01  | 4.84E+00 |
| GOTERM_CC_FAT   | GO:0042645~mitochondrial nucleoid          | 3     | 4.75E-03 | 2.90E-01  | 4.84E+00 |
| GOTERM_BP_FAT   | GO:0051186~cofactor metabolic process      | 6     | 5.38E-03 | 3.01E-01  | 7.05E+00 |
| GOTERM_BP_FAT   | GO:0009081~branched chain family amino a   | 3     | 7.49E-03 | 3.40E-01  | 9.69E+00 |
| GOTERM_BP_FAT   | GO:0006732~coenzyme metabolic process      | 5     | 9.73E-03 | 3.71E-01  | 1.24E+01 |
| GOTERM_BP_FAT   | GO:0055114~oxidation reduction             | 7     | 1.34E-02 | 4.28E-01  | 1.67E+01 |
| GOTERM_CC_FAT   | GO:0005625~soluble fraction                | 3     | 1.98E-02 | 5.13E-01  | 1.88E+01 |
| GOTERM_BP_FAT   | GO:0051188~cofactor biosynthetic process   | 4     | 2.27E-02 | 5.71E-01  | 2.67E+01 |
| GOTERM_MF_FAT   | GO:0050662~coenzyme binding                | 4     | 2.36E-02 | 7.93E-01  | 2.43E+01 |
| GOTERM_CC_FAT   | GO:0044429~mitochondrial part              | 7     | 2.48E-02 | 4.53E-01  | 2.30E+01 |
| PIR_SUPERFAMILY | PIRSF000895:phosphoglycolate phosphatase   | 2     | 2.69E-02 | 5.22E-01  | 2.03E+01 |
| KEGG_PATHWAY    | sce00020:Citrate cycle (TCA cycle)         | 3     | 3.40E-02 | 5.48E-01  | 2.40E+01 |
| GOTERM_BP_FAT   | GO:0015931~nucleobase, nucleoside, nucleo  | 4     | 4.04E-02 | 7.46E-01  | 4.29E+01 |
| GOTERM_BP_FAT   | GO:0006551~leucine metabolic process       | 2     | 4.51E-02 | 7.52E-01  | 4.65E+01 |
| INTERPRO        | IPR006402:HAD-superfamily hydrolase, sub   | 2     | 4.69E-02 | 9.75E-01  | 3.98E+01 |

**Subnetwork 2**

| Category        | Term                                  | Count | PValue   | Benjamini | FDR      |
|-----------------|---------------------------------------|-------|----------|-----------|----------|
| SP_PIR_KEYWORDS | mitochondrion                         | 9     | 1.59E-03 | 1.27E-01  | 1.70E+00 |
| GOTERM_BP_FAT   | GO:0007005~mitochondrion organization | 6     | 4.25E-03 | 7.23E-01  | 5.54E+00 |
| GOTERM_BP_FAT   | GO:0032543~mitochondrial translation  | 4     | 5.89E-03 | 5.89E-01  | 7.60E+00 |
| GOTERM_CC_FAT   | GO:0005739~mitochondrion              | 11    | 6.07E-03 | 4.25E-01  | 6.42E+00 |
| SP_PIR_KEYWORDS | membrane                              | 13    | 1.06E-02 | 3.65E-01  | 1.09E+01 |
| GOTERM_CC_FAT   | GO:0044429~mitochondrial part         | 7     | 1.51E-02 | 4.99E-01  | 1.53E+01 |
| GOTERM_CC_FAT   | GO:0000313~organellar ribosome        | 3     | 4.04E-02 | 7.13E-01  | 3.62E+01 |
| GOTERM_CC_FAT   | GO:0005761~mitochondrial ribosome     | 3     | 4.04E-02 | 7.13E-01  | 3.62E+01 |
| GOTERM_CC_FAT   | GO:0005759~mitochondrial matrix       | 4     | 4.82E-02 | 6.75E-01  | 4.17E+01 |
| GOTERM_CC_FAT   | GO:0031980~mitochondrial lumen        | 4     | 4.82E-02 | 6.75E-01  | 4.17E+01 |

**Subnetwork 3**

| Category        | Term                                        | Count | PValue   | Benjamini | FDR      |
|-----------------|---------------------------------------------|-------|----------|-----------|----------|
| GOTERM_BP_FAT   | GO:0034627~de novo NAD biosynthetic pro     | 3     | 5.54E-05 | 6.52E-03  | 6.34E-02 |
| GOTERM_BP_FAT   | GO:0034354~de novo NAD biosynthetic pro     | 3     | 5.54E-05 | 6.52E-03  | 6.34E-02 |
| SP_PIR_KEYWORDS | pyridine nucleotide biosynthesis            | 3     | 1.34E-04 | 5.88E-03  | 1.25E-01 |
| GOTERM_BP_FAT   | GO:0009110~vitamin biosynthetic process     | 4     | 3.62E-04 | 2.11E-02  | 4.13E-01 |
| GOTERM_BP_FAT   | GO:0042364~water-soluble vitamin biosynth   | 4     | 3.62E-04 | 2.11E-02  | 4.13E-01 |
| GOTERM_BP_FAT   | GO:0009435~NAD biosynthetic process         | 3     | 3.62E-04 | 1.42E-02  | 4.14E-01 |
| GOTERM_BP_FAT   | GO:0006767~water-soluble vitamin metabol    | 4     | 4.79E-04 | 1.40E-02  | 5.47E-01 |
| GOTERM_BP_FAT   | GO:0006766~vitamin metabolic process        | 4     | 5.70E-04 | 1.34E-02  | 6.51E-01 |
| GOTERM_BP_FAT   | GO:0019359~nicotinamide nucleotide biosyn   | 3     | 6.55E-04 | 1.28E-02  | 7.47E-01 |
| GOTERM_BP_FAT   | GO:0019363~pyridine nucleotide biosyntheti  | 3     | 8.33E-04 | 1.40E-02  | 9.49E-01 |
| GOTERM_BP_FAT   | GO:0019674~NAD metabolic process            | 3     | 1.62E-03 | 2.36E-02  | 1.84E+00 |
| GOTERM_BP_FAT   | GO:0044271~nitrogen compound biosynthet     | 5     | 5.74E-03 | 7.27E-02  | 6.38E+00 |
| UP_SEQ_FEATURE  | domain:DEP                                  | 2     | 6.04E-03 | 2.29E-01  | 5.48E+00 |
| GOTERM_BP_FAT   | GO:0046496~nicotinamide nucleotide metab    | 3     | 6.14E-03 | 7.01E-02  | 6.80E+00 |
| GOTERM_BP_FAT   | GO:0006769~nicotinamide metabolic proces    | 3     | 6.39E-03 | 6.64E-02  | 7.07E+00 |
| GOTERM_BP_FAT   | GO:0009820~alkaloid metabolic process       | 3     | 6.39E-03 | 6.64E-02  | 7.07E+00 |
| SMART           | SM00049:DEP                                 | 2     | 6.58E-03 | 3.25E-02  | 2.83E+00 |
| GOTERM_BP_FAT   | GO:0019362~pyridine nucleotide metabolic    | 3     | 6.89E-03 | 6.58E-02  | 7.61E+00 |
| GOTERM_BP_FAT   | GO:0019748~secondary metabolic process      | 3     | 9.10E-03 | 7.96E-02  | 9.93E+00 |
| GOTERM_BP_FAT   | GO:0006733~oxidoreduction coenzyme meta     | 3     | 1.00E-02 | 8.12E-02  | 1.09E+01 |
| GOTERM_BP_FAT   | GO:0043603~cellular amide metabolic proce   | 3     | 1.06E-02 | 8.06E-02  | 1.15E+01 |
| GOTERM_BP_FAT   | GO:0009108~coenzyme biosynthetic process    | 3     | 1.22E-02 | 8.69E-02  | 1.32E+01 |
| INTERPRO        | IPR000591:Pleckstrin/G-protein, interacting | 2     | 1.28E-02 | 2.65E-01  | 9.80E+00 |
| KEGG_PATHWAY    | sce00380:Tryptophan metabolism              | 2     | 2.21E-02 | 4.38E-02  | 4.92E+00 |
| GOTERM_BP_FAT   | GO:0051188~cofactor biosynthetic process    | 3     | 2.73E-02 | 1.75E-01  | 2.72E+01 |
| GOTERM_BP_FAT   | GO:0009165~nucleotide biosynthetic process  | 3     | 3.43E-02 | 2.05E-01  | 3.30E+01 |
| GOTERM_MF_FAT   | GO:0030695~GTPase regulator activity        | 3     | 3.73E-02 | 8.56E-01  | 3.08E+01 |
| GOTERM_BP_FAT   | GO:0034654~nucleobase, nucleoside, nucleo   | 3     | 3.97E-02 | 2.23E-01  | 3.71E+01 |
| GOTERM_BP_FAT   | GO:0034404~nucleobase, nucleoside and nu    | 3     | 3.97E-02 | 2.23E-01  | 3.71E+01 |
| GOTERM_BP_FAT   | GO:0006414~translational elongation         | 4     | 4.70E-02 | 2.47E-01  | 4.23E+01 |

**Subnetwork 4**

| Category        | Term                                        | Count | PValue   | Benjamini | FDR      |
|-----------------|---------------------------------------------|-------|----------|-----------|----------|
| GOTERM_BP_FAT   | GO:0009628~response to abiotic stimulus     | 5     | 1.79E-02 | 9.62E-01  | 2.00E+01 |
| SP_PIR_KEYWORDS | cytoplasm                                   | 8     | 2.74E-02 | 8.21E-01  | 2.44E+01 |
| GOTERM_MF_FAT   | GO:0005199~structural constituent of cell w | 2     | 3.53E-02 | 8.92E-01  | 3.04E+01 |
| UP_SEQ_FEATURE  | compositionally biased region:Poly-Thr      | 2     | 4.56E-02 | 9.27E-01  | 3.69E+01 |

**Subnetwork 5**

| Category      | Term                                        | Count | PValue   | Benjamini | FDR      |
|---------------|---------------------------------------------|-------|----------|-----------|----------|
| GOTERM_BP_FAT | GO:0034605~cellular response to heat        | 5     | 2.61E-05 | 1.31E-03  | 2.52E-02 |
| GOTERM_BP_FAT | GO:0009408~response to heat                 | 5     | 4.12E-05 | 1.03E-03  | 3.97E-02 |
| GOTERM_BP_FAT | GO:0009266~response to temperature stimul   | 5     | 5.36E-05 | 8.93E-04  | 5.16E-02 |
| GOTERM_BP_FAT | GO:0007039~vacuolar protein catabolic proc  | 4     | 2.56E-04 | 3.20E-03  | 2.47E-01 |
| GOTERM_BP_FAT | GO:0009628~response to abiotic stimulus     | 5     | 3.28E-04 | 3.27E-03  | 3.15E-01 |
| GOTERM_BP_FAT | GO:0033554~cellular response to stress      | 5     | 2.17E-03 | 1.80E-02  | 2.08E+00 |
| GOTERM_BP_FAT | GO:0019323~pentose catabolic process        | 2     | 6.15E-03 | 4.31E-02  | 5.77E+00 |
| GOTERM_BP_FAT | GO:0044257~cellular protein catabolic proce | 4     | 6.30E-03 | 3.87E-02  | 5.91E+00 |
| GOTERM_BP_FAT | GO:0030163~protein catabolic process        | 4     | 6.98E-03 | 3.82E-02  | 6.53E+00 |
| GOTERM_BP_FAT | GO:0042732~D-xylose metabolic process       | 2     | 7.37E-03 | 3.63E-02  | 6.88E+00 |
| KEGG_PATHWAY  | sce00040:~Pentose and glucuronate interconv | 2     | 9.71E-03 | 6.60E-02  | 4.91E+00 |
| GOTERM_BP_FAT | GO:0044265~cellular macromolecule catabo    | 4     | 1.47E-02 | 6.52E-02  | 1.33E+01 |
| GOTERM_BP_FAT | GO:0009057~macromolecule catabolic proce    | 4     | 1.66E-02 | 6.74E-02  | 1.49E+01 |
| GOTERM_BP_FAT | GO:0019321~pentose metabolic process        | 2     | 2.32E-02 | 8.63E-02  | 2.02E+01 |

**Subnetwork 6**

| Category        | Term                                          | Count | PValue   | Benjamini | FDR      |
|-----------------|-----------------------------------------------|-------|----------|-----------|----------|
| GOTERM_CC_FAT   | GO:0005838~proteasome regulatory particle     | 4     | 4.32E-06 | 1.95E-04  | 4.07E-03 |
| GOTERM_CC_FAT   | GO:0022624~proteasome accessory complex       | 4     | 4.32E-06 | 1.95E-04  | 4.07E-03 |
| GOTERM_CC_FAT   | GO:0034515~proteasome storage granule         | 4     | 8.64E-06 | 1.94E-04  | 8.12E-03 |
| GOTERM_CC_FAT   | GO:0031597~cytosolic proteasome complex       | 4     | 8.64E-06 | 1.94E-04  | 8.12E-03 |
| SP_PIR_KEYWORDS | proteasome                                    | 4     | 1.12E-05 | 4.15E-04  | 1.01E-02 |
| GOTERM_CC_FAT   | GO:0000502~proteasome complex                 | 4     | 4.12E-05 | 6.17E-04  | 3.87E-02 |
| KEGG_PATHWAY    | sce03050:~Proteasome                          | 4     | 5.19E-05 | 1.56E-04  | 1.64E-02 |
| GOTERM_CC_FAT   | GO:0044445~cytosolic part                     | 5     | 8.99E-05 | 1.01E-03  | 8.45E-02 |
| GOTERM_BP_FAT   | GO:0006511~ubiquitin-dependent protein ca     | 5     | 1.25E-04 | 1.37E-02  | 1.41E-01 |
| GOTERM_CC_FAT   | GO:0008541~proteasome regulatory particle     | 3     | 1.54E-04 | 1.38E-03  | 1.45E-01 |
| GOTERM_BP_FAT   | GO:0019941~modification-dependent protei      | 5     | 3.33E-04 | 1.82E-02  | 3.76E-01 |
| GOTERM_BP_FAT   | GO:0051603~proteolysis involved in cellular   | 5     | 3.85E-04 | 1.40E-02  | 4.34E-01 |
| GOTERM_BP_FAT   | GO:0043632~modification-dependent macro       | 5     | 4.42E-04 | 1.21E-02  | 4.98E-01 |
| INTERPRO        | IPR011991:~Winged helix repressor DNA-bin     | 3     | 5.67E-04 | 1.24E-02  | 4.43E-01 |
| GOTERM_BP_FAT   | GO:0044257~cellular protein catabolic proce   | 5     | 1.47E-03 | 3.19E-02  | 1.65E+00 |
| GOTERM_BP_FAT   | GO:0030163~protein catabolic process          | 5     | 1.69E-03 | 3.05E-02  | 1.89E+00 |
| GOTERM_BP_FAT   | GO:0006508~proteolysis                        | 5     | 1.85E-03 | 2.87E-02  | 2.07E+00 |
| GOTERM_CC_FAT   | GO:0005829~cytosol                            | 5     | 1.96E-03 | 1.46E-02  | 1.83E+00 |
| GOTERM_BP_FAT   | GO:0044265~cellular macromolecule catabo      | 5     | 4.54E-03 | 6.07E-02  | 5.02E+00 |
| GOTERM_BP_FAT   | GO:0009057~macromolecule catabolic proce      | 5     | 5.33E-03 | 6.32E-02  | 5.86E+00 |
| COG_ONTOLOGY    | Posttranslational modification, protein turno | 4     | 7.76E-03 | 3.07E-02  | 2.93E+00 |
| SP_PIR_KEYWORDS | protein degradation                           | 2     | 1.48E-02 | 2.41E-01  | 1.25E+01 |
| UP_SEQ_FEATURE  | domain:PCI                                    | 2     | 1.48E-02 | 3.21E-01  | 1.15E+01 |
| INTERPRO        | IPR000717:~Proteasome component region P      | 2     | 1.49E-02 | 1.52E-01  | 1.11E+01 |
| GOTERM_CC_FAT   | GO:0008540~proteasome regulatory particle     | 2     | 1.51E-02 | 9.34E-02  | 1.34E+01 |
| SP_PIR_KEYWORDS | acetylation                                   | 3     | 1.63E-02 | 1.83E-01  | 1.37E+01 |
| SMART           | SM00088:~PINT                                 | 2     | 1.97E-02 | 7.63E-02  | 7.30E+00 |
| GOTERM_BP_FAT   | GO:0034621~cellular macromolecular comp       | 4     | 2.75E-02 | 2.64E-01  | 2.70E+01 |
| GOTERM_BP_FAT   | GO:0043933~macromolecular complex subu        | 4     | 4.48E-02 | 3.68E-01  | 4.04E+01 |

**Subnetwork 7**

| Category      | Term                                       | Count | PValue   | Benjamini | FDR      |
|---------------|--------------------------------------------|-------|----------|-----------|----------|
| GOTERM_BP_FAT | GO:0015031~protein transport               | 4     | 9.29E-03 | 3.55E-01  | 8.48E+00 |
| GOTERM_BP_FAT | GO:0045184~establishment of protein locali | 4     | 1.14E-02 | 2.37E-01  | 1.03E+01 |
| GOTERM_BP_FAT | GO:0008104~protein localization            | 4     | 1.51E-02 | 2.13E-01  | 1.35E+01 |

**Subnetwork 8**

| Category        | Term                                       | Count | PValue   | Benjamini | FDR      |
|-----------------|--------------------------------------------|-------|----------|-----------|----------|
| SP_PIR_KEYWORDS | sterol biosynthesis                        | 2     | 2.03E-02 | 4.60E-01  | 1.60E+01 |
| SP_PIR_KEYWORDS | oxidoreductase                             | 3     | 2.10E-02 | 2.73E-01  | 1.66E+01 |
| SP_PIR_KEYWORDS | Steroid biosynthesis                       | 2     | 2.30E-02 | 2.08E-01  | 1.80E+01 |
| GOTERM_BP_FAT   | GO:0016129~phytosteroid biosynthetic proce | 2     | 2.92E-02 | 9.83E-01  | 2.94E+01 |
| GOTERM_BP_FAT   | GO:0006696~ergosterol biosynthetic process | 2     | 2.92E-02 | 9.83E-01  | 2.94E+01 |
| KEGG_PATHWAY    | sce00100:Steroid biosynthesis              | 2     | 3.10E-02 | 9.01E-02  | 9.43E+00 |
| GOTERM_BP_FAT   | GO:0008204~ergosterol metabolic process    | 2     | 3.16E-02 | 8.89E-01  | 3.15E+01 |
| GOTERM_BP_FAT   | GO:0016128~phytosteroid metabolic process  | 2     | 3.16E-02 | 8.89E-01  | 3.15E+01 |
| GOTERM_BP_FAT   | GO:0016126~sterol biosynthetic process     | 2     | 4.12E-02 | 8.53E-01  | 3.90E+01 |
| GOTERM_BP_FAT   | GO:0006694~steroid biosynthetic process    | 2     | 4.12E-02 | 8.53E-01  | 3.90E+01 |
| SP_PIR_KEYWORDS | lipid synthesis                            | 2     | 4.39E-02 | 2.86E-01  | 3.18E+01 |
| GOTERM_CC_FAT   | GO:0005783~endoplasmic reticulum           | 3     | 4.88E-02 | 8.84E-01  | 3.72E+01 |

**Table S5: Results of YeastMine analysis of subnetwork 1.**

| GO Term                                                  | p-Value  | Matches | Associated ORFs                                                                                                                                                            | GO Term ID |
|----------------------------------------------------------|----------|---------|----------------------------------------------------------------------------------------------------------------------------------------------------------------------------|------------|
| organic acid biosynthetic process [GO:0016053]           | 3.85E-08 | 11      | YBR249C, YCL009C, YCL018W, YDR034C, YEL071W, YFL018C, YGR012W, YHR063C, YKL184W, YMR062C, YOR196C                                                                          | GO:0016053 |
| carboxylic acid biosynthetic process [GO:0046394]        | 3.85E-08 | 11      | YBR249C, YCL009C, YCL018W, YDR034C, YEL071W, YFL018C, YGR012W, YHR063C, YKL184W, YMR062C, YOR196C                                                                          | GO:0046394 |
| single-organism biosynthetic process [GO:0044711]        | 4.17E-07 | 17      | YDR034C, YDR531W, YEL071W, YER026C, YFL018C, YGR012W, YHR063C, YJR073C, YKL184W, YMR062C, YOR142W, YOR196C, YPL031C                                                        | GO:0044711 |
| small molecule biosynthetic process [GO:0044283]         | 7.54E-07 | 12      | YBR239C, YBR249C, YCL009C, YCL018W, YDR034C, YEL071W, YFL018C, YGR012W, YHR063C, YKL184W, YMR062C, YOR196C                                                                 | GO:0044283 |
| carboxylic acid metabolic process [GO:0019752]           | 1.90E-06 | 13      | YBR249C, YCL009C, YCL018W, YDR034C, YDR178W, YEL071W, YFL018C, YGR012W, YHR063C, YKL184W, YMR062C, YOR142W, YOR196C                                                        | GO:0019752 |
| oxoacid metabolic process [GO:0043436]                   | 2.90E-06 | 13      | YBR249C, YCL009C, YCL018W, YDR034C, YDR178W, YEL071W, YFL018C, YGR012W, YHR063C, YKL184W, YMR062C, YOR142W, YOR196C                                                        | GO:0043436 |
| organic acid metabolic process [GO:0006082]              | 2.98E-06 | 13      | YBR249C, YCL009C, YCL018W, YDR034C, YDR178W, YEL071W, YFL018C, YGR012W, YHR063C, YKL184W, YMR062C, YOR142W, YOR196C                                                        | GO:0006082 |
| small molecule metabolic process [GO:0044281]            | 3.41E-06 | 17      | YBR239C, YBR249C, YCL009C, YCL018W, YDR034C, YDR178W, YDR531W, YEL071W, YFL018C, YGR012W, YHR043C, YHR063C, YKL184W, YMR062C, YOR142W, YOR196C, YPL031C                    | GO:0044281 |
| single-organism metabolic process [GO:0044710]           | 1.64E-05 | 22      | YBL030C, YBR239C, YBR249C, YCL009C, YCL018W, YDR034C, YDR178W, YDR531W, YEL071W, YER026C, YFL018C, YGL257C, YGR012W, YGR207C, YHR043C, YHR063C, YJR073C, YKL184W, YMR062C, | GO:0044710 |
| cellular amino acid biosynthetic process [GO:0008652]    | 1.91E-05 | 7       | YBR249C, YCL009C, YCL018W, YDR034C, YFL018C, YGR012W, YMR062C                                                                                                              | GO:0008652 |
| alpha-amino acid metabolic process [GO:1901605]          | 2.26E-05 | 8       | YCL009C, YCL018W, YDR034C, YFL018C, YGR012W, YHR063C, YKL184W, YMR062C                                                                                                     | GO:1901605 |
| branched-chain amino acid metabolic process [GO:0009081] | 2.73E-05 | 4       | YCL009C, YCL018W, YFL018C, YHR063C                                                                                                                                         | GO:0009081 |
| cellular amino acid metabolic process [GO:0006520]       | 2.77E-05 | 9       | YBR249C, YCL009C, YCL018W, YDR034C, YFL018C, YGR012W, YHR063C, YKL184W, YMR062C                                                                                            | GO:0006520 |
| valine metabolic process [GO:0006573]                    | 3.98E-05 | 3       | YCL009C, YFL018C, YHR063C                                                                                                                                                  | GO:0006573 |

|                                                                   |          |   |                                                      |            |
|-------------------------------------------------------------------|----------|---|------------------------------------------------------|------------|
| alpha-amino acid biosynthetic process<br>[GO:1901607]             | 1.35E-04 | 6 | YCL009C, YCL018W, YDR034C, YFL018C, YGR012W, YMR062C | GO:1901607 |
| cellular modified amino acid biosynthetic process<br>[GO:0042398] | 6.57E-04 | 3 | YER026C, YHR063C, YKL184W                            | GO:0042398 |
| monocarboxylic acid biosynthetic process<br>[GO:0072330]          | 9.53E-04 | 4 | YEL071W, YHR063C, YKL184W, YOR196C                   | GO:0072330 |
| monocarboxylic acid metabolic process<br>[GO:0032787]             | 1.26E-03 | 6 | YCL018W, YEL071W, YFL018C, YHR063C, YKL184W, YOR196C | GO:0032787 |
| ornithine metabolic process<br>[GO:0006591]                       | 1.43E-03 | 2 | YKL184W, YMR062C                                     | GO:0006591 |
| L-serine metabolic process<br>[GO:0006563]                        | 1.78E-03 | 2 | YFL018C, YGR012W                                     | GO:0006563 |
| pantothenate metabolic process [GO:0015939]                       | 1.78E-03 | 2 | YHR063C, YKL184W                                     | GO:0015939 |
| pantothenate biosynthetic process [GO:0015940]                    | 1.78E-03 | 2 | YHR063C, YKL184W                                     | GO:0015940 |

**Table S6: Gene expression values of RM and BY strains for genes in the phosphocholine network and statistical analysis.**

| <b>Gene</b>                          | <b>MHO1</b>       | <b>OPT1</b>      | <b>ITR1</b>      |
|--------------------------------------|-------------------|------------------|------------------|
| Nonsynonymous SNPs                   | A331T; F164I      | A200V; V439I     | C521F            |
| SNPs in promoter region (-1 to -500) | 4                 | 4                | 2                |
| *RM Average                          | -0.1542           | 0.0317           | 0.0342           |
| Fold Change(RM/BY)                   | 1.1128            | 0.9783           | 0.9766           |
| #Expression difference (RM-BY)       | -0.2708           | 0.1200           | 0.1108           |
| p-value                              | 0.0019            | 0.3730           | 0.0782           |
| 95% CI (Expression Diff)             | [-0.4260,-0.1157] | [-0.1574,0.3974] | [-0.0140,0.2357] |
| 95% CI (Fold Change)                 | [0.7443,0.9229]   | [-0.1574,0.3974] | [0.9903,1.1775]  |

  

| <b>Gene</b>                          | <b>OPI3</b>       | <b>CHO1</b>       |
|--------------------------------------|-------------------|-------------------|
| Nonsynonymous SNPs                   | None              | A9T; L234F        |
| SNPs in promoter region (-1 to -500) | 4                 | 6                 |
| *RM Average                          | -0.5958           | -0.3100           |
| Fold Change(RM/BY)                   | 1.5113            | 1.2397            |
| #Expression difference (RM-BY)       | -0.4558           | -0.1767           |
| p-value                              | 0.0078            | 0.0219            |
| 95% CI (Expression Diff)             | [-0.7735,-0.1381] | [-0.3241,-0.0292] |
| 95% CI (Fold Change)                 | [0.5850,0.9087]   | [0.7988,0.9800]   |

\* Average expression difference from 12 RM parent strains compared to a pool of BY strains - see "RM BY expression values" tab

# Average expression difference from 12 RM parent strains compared to a pool of BY strains and 6 BY strains compared to the same pool of BY strains

**Table S7: Identification of transcription factors controlling subnetworks using YEASTRACT.**

**Subnetwork 1**

| Transcription Factor   | % in user set | % in Yeastract | p-value  | Target ORF/Genes                                                                                                                                                  |
|------------------------|---------------|----------------|----------|-------------------------------------------------------------------------------------------------------------------------------------------------------------------|
| <a href="#">Opi1p</a>  | 21.62%        | 2.09%          | 1.07E-04 | PET9 SDH4 ITR1 CHO1 MCY1 OPT1 MHO1 OPI3                                                                                                                           |
| <a href="#">Cup9p</a>  | 37.84%        | 1.29%          | 1.74E-04 | PET9 ILV6 LEU2 FCF1 ITR1 CAB1 DLD3 CHO1 AIM13 CIR1 PAN5 RPB4 THI7 PHO85                                                                                           |
| <a href="#">Pho4p</a>  | 40.54%        | 1.06%          | 9.32E-04 | ILV6 LEU2 FCF1 ITR1 CHO1 AIM13 DOG2 PAN5 YIL165C MHO1 OPI3 MOG1 ARG7 LIP5 PHO85                                                                                   |
| <a href="#">Phd1p</a>  | 27.03%        | 1.31%          | 1.24E-03 | PET9 ARO4 LEU2 LYS14 DLD3 CHO1 LPD1 RPB4 LSC1 PHO85                                                                                                               |
| <a href="#">Met32p</a> | 21.62%        | 1.45%          | 1.58E-03 | ARO4 DLD3 DOG2 YIL165C OPT1 MHO1 THI7 ARG7                                                                                                                        |
| <a href="#">Thi2p</a>  | 27.03%        | 1.25%          | 1.79E-03 | PET9 ILV6 LEU2 LYS14 SDH4 FCF1 ITR1 CAB1 AIM13 THI7                                                                                                               |
| <a href="#">Xbp1p</a>  | 37.84%        | 1.00%          | 2.84E-03 | PET9 SDH4 DLD3 LPD1 CIR1 DOG2 PAN5 YIL165C MOG1 SPE1 ARG7 YOR131C LSC1 LIP5                                                                                       |
| <a href="#">Stp1p</a>  | 24.32%        | 1.25%          | 2.92E-03 | LEU2 LYS14 CAB1 MCY1 PAN5 OPT1 MHO1 THI7 ARG7                                                                                                                     |
| <a href="#">Aca1p</a>  | 13.51%        | 1.75%          | 3.15E-03 | PET9 ILV6 LEU2 CHO1 PHO85                                                                                                                                         |
| <a href="#">Stp2p</a>  | 21.62%        | 1.24%          | 4.66E-03 | ERT1 LEU2 LYS14 MCY1 OPT1 MHO1 THI7 YOR131C                                                                                                                       |
| <a href="#">Put3p</a>  | 21.62%        | 1.21%          | 5.43E-03 | PET9 ILV6 LEU2 SDH4 CHO1 LPD1 AIM13 OPI3                                                                                                                          |
| <a href="#">Swi4p</a>  | 29.73%        | 1.03%          | 5.98E-03 | PET9 ERT1 NHP10 SDH4 FCF1 SBE2 MCY1 PAN5 THI7 PDP3 ARG7                                                                                                           |
| <a href="#">Met28p</a> | 10.81%        | 1.74%          | 6.26E-03 | MCY1 YIL165C OPT1 PHO85                                                                                                                                           |
| <a href="#">Ace2p</a>  | 83.78%        | 0.65%          | 6.30E-03 | PET9 ARO4 ILV6 LEU2 NHP10 LYS14 SDH4 FCF1 SBE2 ITR1 CAB1 DLD3 CHO1 LPD1 AIM13 RSC8 MNT2 MCY1 YHI9 DOG2 PAN5 OPT1 MHO1 MOG1 SPE1 THI7 PDP3 ARG7 YOR131C LIP5 PHO85 |
| <a href="#">Yap3p</a>  | 13.51%        | 1.49%          | 6.94E-03 | ILV6 LEU2 SDH4 CHO1 LIP5                                                                                                                                          |
| <a href="#">Hap5p</a>  | 16.22%        | 1.33%          | 7.48E-03 | PET9 LEU2 LYS14 SDH4 CHO1 LPD1                                                                                                                                    |
| <a href="#">Pdc2p</a>  | 2.70%         | 3.85%          | 7.87E-03 | <a href="#">THI7</a>                                                                                                                                              |
| <a href="#">Gcn4p</a>  | 59.46%        | 0.73%          | 1.04E-02 | ARO4 ILV6 LEU2 LYS14 SDH4 SBE2 ITR1 CAB1 DLD3 LPD1 CIR1 YHI9 DOG2 YIL165C OPT1 MHO1 OPI3 SPE1 THI7 ARG7 LIP5 PHO85                                                |
| <a href="#">Wtm2p</a>  | 8.11%         | 1.78%          | 1.09E-02 | MCY1 MOG1 PDP3                                                                                                                                                    |
| <a href="#">Rgt1p</a>  | 16.22%        | 1.20%          | 1.29E-02 | ILV6 LEU2 CHO1 LPD1 RSC8 PHO85                                                                                                                                    |
| <a href="#">Gln3p</a>  | 29.73%        | 0.93%          | 1.37E-02 | ILV6 LEU2 ITR1 CHO1 AIM13 RSC8 YHI9 DOG2 YIL165C OPT1 MOG1                                                                                                        |
| <a href="#">Mig3p</a>  | 37.84%        | 0.84%          | 1.50E-02 | PET9 ILV6 FCF1 ITR1 DLD3 CHO1 MCY1 YHI9 DOG2 RPB4 OPT1 SPE1 THI7 LSC1                                                                                             |



|                         |        |       |          |                                                                                                                                                     |
|-------------------------|--------|-------|----------|-----------------------------------------------------------------------------------------------------------------------------------------------------|
| <a href="#">Hot1p</a>   | 5.41%  | 1.96% | 1.55E-02 | LEU2 MHO1                                                                                                                                           |
| <a href="#">Gal4p</a>   | 29.73% | 0.90% | 1.64E-02 | PET9 ARO4 ILV6 LEU2 FCF1 CHO1 AIM13 CIR1<br>RPB4 THI7 PHO85                                                                                         |
| <a href="#">Leu3p</a>   | 18.92% | 1.05% | 1.87E-02 | PET9 ARO4 ILV6 LEU2 PAN5 SPE1 ARG7                                                                                                                  |
| <a href="#">Tye7p</a>   | 29.73% | 0.89% | 1.88E-02 | ILV6 LEU2 FCF1 CAB1 AIM13 MNT2 CIR1 RPB4<br>SPE1 THI7 PHO85                                                                                         |
| <a href="#">Hap3p</a>   | 10.81% | 1.31% | 1.99E-02 | PET9 LEU2 SDH4 LPD1                                                                                                                                 |
| <a href="#">Yrm1p</a>   | 51.35% | 0.73% | 2.19E-02 | ILV6 LYS14 SDH4 SBE2 ITR1 CAB1 DLD3 LPD1<br>AIM13 RSC8 CIR1 YHI9 PAN5 YIL165C RPB4 MOG1<br>SPE1 THI7 LSC1                                           |
| <a href="#">Abf1p</a>   | 54.05% | 0.71% | 2.46E-02 | PET9 ERT1 ARO4 LEU2 LYS14 SDH4 FCF1 SBE2<br>CHO1 LPD1 AIM13 MNT2 YHI9 DOG2 PAN5 OPT1<br>SPE1 THI7 ARG7 PHO85                                        |
| <a href="#">Tup1p</a>   | 51.35% | 0.71% | 2.79E-02 | PET9 ERT1 ARO4 ILV6 LYS14 SDH4 FCF1 SBE2<br>DLD3 LPD1 AIM13 MCY1 YHI9 PAN5 RPB4 OPT1<br>THI7 LIP5 PHO85                                             |
| <a href="#">Kar4p</a>   | 21.62% | 0.93% | 2.85E-02 | ILV6 LEU2 DLD3 CHO1 LPD1 OPT1 THI7 PHO85                                                                                                            |
| <a href="#">Gat1p</a>   | 8.11%  | 1.32% | 2.90E-02 | YHI9 OPT1 MHO1                                                                                                                                      |
| <a href="#">Ert1p</a>   | 8.11%  | 1.31% | 2.98E-02 | PET9 ERT1 MCY1                                                                                                                                      |
| <a href="#">YNR063W</a> | 2.70%  | 1.85% | 3.16E-02 | <a href="#">YOR131C</a>                                                                                                                             |
| <a href="#">Rim101p</a> | 37.84% | 0.75% | 3.75E-02 | ARO4 NHP10 SBE2 DLD3 CHO1 AIM13 RSC8 MCY1<br>CIR1 YHI9 YIL165C RPB4 THI7 ARG7                                                                       |
| <a href="#">YKL222C</a> | 2.70%  | 1.67% | 3.84E-02 | <a href="#">MHO1</a>                                                                                                                                |
| <a href="#">Dal81p</a>  | 10.81% | 1.08% | 4.03E-02 | LEU2 DLD3 MCY1 OPT1                                                                                                                                 |
| <a href="#">Zap1p</a>   | 32.43% | 0.78% | 4.04E-02 | ILV6 LEU2 NHP10 DLD3 MNT2 DOG2 OPT1 MHO1<br>OPI3 THI7 ARG7 LIP5                                                                                     |
| <a href="#">Met4p</a>   | 32.43% | 0.77% | 4.24E-02 | LYS14 SBE2 ITR1 DLD3 CHO1 DOG2 YIL165C OPT1<br>MHO1 OPI3 MOG1 THI7                                                                                  |
| <a href="#">Sfp1p</a>   | 72.97% | 0.62% | 4.26E-02 | PET9 ARO4 ILV6 LEU2 SDH4 FCF1 SBE2 ITR1 CAB1<br>DLD3 CHO1 AIM13 RSC8 CIR1 YHI9 DOG2 PAN5<br>YIL165C RPB4 OPT1 MHO1 MOG1 THI7 PDP3 ARG7<br>LSC1 LIP5 |
| <a href="#">Pho2p</a>   | 24.32% | 0.84% | 4.26E-02 | SDH4 ITR1 DLD3 RSC8 CIR1 PAN5 YIL165C OPI3<br>THI7                                                                                                  |
| <a href="#">Ixr1p</a>   | 35.14% | 0.75% | 4.61E-02 | PET9 ARO4 ILV6 FCF1 DLD3 CHO1 LPD1 AIM13<br>CIR1 YHI9 THI7 PDP3 ARG7                                                                                |
| <a href="#">Sok2p</a>   | 43.24% | 0.71% | 4.76E-02 | PET9 ERT1 ARO4 ILV6 LEU2 SDH4 FCF1 DLD3<br>AIM13 PAN5 YIL165C OPT1 MHO1 OPI3 THI7 ARG7                                                              |
| <a href="#">Dot6p</a>   | 5.41%  | 1.26% | 4.86E-02 | FCF1 MCY1                                                                                                                                           |
| <a href="#">Ino2p</a>   | 16.22% | 0.91% | 5.04E-02 | ITR1 CHO1 RPB4 MHO1 OPI3 ARG7                                                                                                                       |
| <a href="#">Rap1p</a>   | 54.05% | 0.67% | 5.08E-02 | PET9 ARO4 ILV6 LEU2 SBE2 ITR1 DLD3 CHO1<br>LPD1 MCY1 CIR1 YHI9 OPT1 OPI3 MOG1 SPE1 THI7<br>PDP3 LSC1 LIP5                                           |
| <a href="#">Bas1p</a>   | 54.05% | 0.67% | 5.10E-02 | PET9 ERT1 LEU2 LYS14 SDH4 ITR1 DLD3 LPD1<br>AIM13 MCY1 CIR1 YHI9 OPT1 MHO1 OPI3 SPE1<br>THI7 PDP3 ARG7 LIP5                                         |
| <a href="#">Arg80p</a>  | 10.81% | 1.01% | 5.19E-02 | SDH4 SBE2 MOG1 PDP3                                                                                                                                 |
| <a href="#">YPR196W</a> | 5.41%  | 1.20% | 5.48E-02 | FCF1 MCY1                                                                                                                                           |

|                         |        |       |          |                                                                                                                                          |
|-------------------------|--------|-------|----------|------------------------------------------------------------------------------------------------------------------------------------------|
| <a href="#">Rtg3p</a>   | 16.22% | 0.89% | 5.54E-02 | FCF1 DLD3 MCY1 PAN5 MOG1 ARG7                                                                                                            |
| <a href="#">Rpn4p</a>   | 35.14% | 0.73% | 5.81E-02 | PET9 ARO4 ILV6 SDH4 CAB1 DLD3 YHI9 YIL165C<br>OPI3 ARG7 YOR131C LSC1 PHO85                                                               |
| <a href="#">Ino4p</a>   | 29.73% | 0.75% | 6.08E-02 | LEU2 LYS14 ITR1 CHO1 AIM13 RPB4 MHO1 OPI3<br>MOG1 SPE1 THI7                                                                              |
| <a href="#">Ume6p</a>   | 29.73% | 0.75% | 6.30E-02 | PET9 DLD3 CHO1 CIR1 YHI9 PAN5 YIL165C OPT1<br>OPI3 PDP3 ARG7                                                                             |
| <a href="#">Ste12p</a>  | 64.86% | 0.62% | 6.65E-02 | PET9 ERT1 ARO4 ILV6 LEU2 LYS14 FCF1 SBE2<br>CAB1 CHO1 LPD1 AIM13 RSC8 MNT2 MCY1 YHI9<br>DOG2 YIL165C RPB4 THI7 PDP3 ARG7 YOR131C<br>LSC1 |
| <a href="#">Mga1p</a>   | 16.22% | 0.85% | 6.67E-02 | PET9 ARO4 LEU2 CAB1 DLD3 PAN5                                                                                                            |
| <a href="#">Stb5p</a>   | 24.32% | 0.77% | 6.73E-02 | ILV6 LEU2 LYS14 CAB1 CHO1 LPD1 SPE1 LSC1<br>PHO85                                                                                        |
| <a href="#">YGR067C</a> | 5.41%  | 1.09% | 6.83E-02 | MCY1 PHO85                                                                                                                               |
| <a href="#">Tod6p</a>   | 2.70%  | 1.19% | 7.00E-02 | <a href="#">MCY1</a>                                                                                                                     |
| <a href="#">Sut2p</a>   | 5.41%  | 1.08% | 7.10E-02 | MCY1 PHO85                                                                                                                               |
| <a href="#">Stb4p</a>   | 2.70%  | 1.18% | 7.15E-02 | <a href="#">MCY1</a>                                                                                                                     |
| <a href="#">Gal80p</a>  | 2.70%  | 1.16% | 7.29E-02 | <a href="#">MCY1</a>                                                                                                                     |
| <a href="#">Mig2p</a>   | 8.11%  | 0.98% | 7.30E-02 | YHI9 DOG2 OPT1                                                                                                                           |
| <a href="#">Nrg1p</a>   | 16.22% | 0.83% | 7.52E-02 | PET9 FCF1 DLD3 AIM13 DOG2 PDP3                                                                                                           |
| <a href="#">Ppr1p</a>   | 5.41%  | 1.03% | 7.84E-02 | FCF1 MCY1                                                                                                                                |
| <a href="#">Upc2p</a>   | 8.11%  | 0.94% | 8.08E-02 | ILV6 OPT1 THI7                                                                                                                           |
| <a href="#">Oaf1p</a>   | 18.92% | 0.78% | 8.28E-02 | PET9 FCF1 AIM13 MCY1 PAN5 ARG7 PHO85                                                                                                     |
| <a href="#">Tos4p</a>   | 5.41%  | 0.99% | 8.61E-02 | RSC8 PAN5                                                                                                                                |
| <a href="#">Rsc30p</a>  | 2.70%  | 0.98% | 9.77E-02 | <a href="#">DOG2</a>                                                                                                                     |
| <a href="#">Cha4p</a>   | 5.41%  | 0.92% | 1.01E-01 | MCY1 PAN5                                                                                                                                |
| <a href="#">Nrg2p</a>   | 8.11%  | 0.86% | 1.03E-01 | AIM13 DOG2 PDP3                                                                                                                          |
| <a href="#">Arg81p</a>  | 8.11%  | 0.86% | 1.06E-01 | DLD3 MHO1 YOR131C                                                                                                                        |
| <a href="#">Arr1p</a>   | 29.73% | 0.69% | 1.07E-01 | ARO4 LYS14 SDH4 ITR1 DLD3 PAN5 OPT1 OPI3<br>MOG1 ARG7 PHO85                                                                              |
| <a href="#">Cad1p</a>   | 16.22% | 0.75% | 1.13E-01 | DLD3 RSC8 YHI9 YIL165C PDP3 ARG7                                                                                                         |
| <a href="#">Cat8p</a>   | 5.41%  | 0.87% | 1.15E-01 | LEU2 DLD3                                                                                                                                |
| <a href="#">Gcr1p</a>   | 29.73% | 0.67% | 1.20E-01 | ARO4 ILV6 SDH4 DLD3 CHO1 LPD1 YHI9 RPB4<br>OPT1 MHO1 LIP5                                                                                |
| <a href="#">Rdr1p</a>   | 5.41%  | 0.85% | 1.21E-01 | FCF1 MCY1                                                                                                                                |
| <a href="#">Flo8p</a>   | 18.92% | 0.72% | 1.25E-01 | PET9 ERT1 LEU2 ITR1 CHO1 OPT1 ARG7                                                                                                       |
| <a href="#">Hms1p</a>   | 18.92% | 0.70% | 1.34E-01 | ILV6 LEU2 FCF1 CHO1 AIM13 THI7 PHO85                                                                                                     |
| <a href="#">Mot2p</a>   | 2.70%  | 0.81% | 1.35E-01 | <a href="#">YIL165C</a>                                                                                                                  |
| <a href="#">Ime1p</a>   | 2.70%  | 0.81% | 1.35E-01 | <a href="#">RPB4</a>                                                                                                                     |
| <a href="#">Sip4p</a>   | 5.41%  | 0.81% | 1.35E-01 | MCY1 DOG2                                                                                                                                |
| <a href="#">Hap4p</a>   | 18.92% | 0.70% | 1.36E-01 | PET9 ERT1 SDH4 LPD1 ARG7 YOR131C LSC1                                                                                                    |
| <a href="#">Yap7p</a>   | 13.51% | 0.72% | 1.45E-01 | ILV6 LEU2 YHI9 THI7 PHO85                                                                                                                |
| <a href="#">Asg1p</a>   | 5.41%  | 0.78% | 1.48E-01 | SDH4 FCF1                                                                                                                                |
| <a href="#">Sut1p</a>   | 10.81% | 0.73% | 1.53E-01 | LPD1 DOG2 MHO1 THI7                                                                                                                      |
| <a href="#">Usv1p</a>   | 2.70%  | 0.75% | 1.53E-01 | <a href="#">ERT1</a>                                                                                                                     |
| <a href="#">Eds1p</a>   | 2.70%  | 0.74% | 1.56E-01 | <a href="#">FCF1</a>                                                                                                                     |
| <a href="#">Met31p</a>  | 8.11%  | 0.74% | 1.59E-01 | DLD3 YIL165C OPT1                                                                                                                        |
| <a href="#">YPR015C</a> | 2.70%  | 0.72% | 1.60E-01 | <a href="#">CHO1</a>                                                                                                                     |

|                         |        |       |          |                                                                                                               |
|-------------------------|--------|-------|----------|---------------------------------------------------------------------------------------------------------------|
| <a href="#">Rds2p</a>   | 10.81% | 0.71% | 1.63E-01 | PET9 ILV6 LEU2 SDH4                                                                                           |
| <a href="#">Hal9p</a>   | 5.41%  | 0.73% | 1.67E-01 | PET9 MHO1                                                                                                     |
| <a href="#">Oaf3p</a>   | 8.11%  | 0.71% | 1.71E-01 | PET9 MCY1 PHO85                                                                                               |
| <a href="#">YLR278C</a> | 8.11%  | 0.71% | 1.76E-01 | FCF1 MCY1 THI7                                                                                                |
| <a href="#">Sfl1p</a>   | 2.70%  | 0.68% | 1.79E-01 | <a href="#">ARG7</a>                                                                                          |
| <a href="#">Rox1p</a>   | 16.22% | 0.66% | 1.80E-01 | PET9 ARO4 LEU2 NHP10 ITR1 DLD3                                                                                |
| <a href="#">Aro80p</a>  | 8.11%  | 0.70% | 1.80E-01 | LEU2 MHO1 PHO85                                                                                               |
| <a href="#">Smp1p</a>   | 5.41%  | 0.70% | 1.84E-01 | SBE2 MHO1                                                                                                     |
| <a href="#">Swi5p</a>   | 32.43% | 0.62% | 1.84E-01 | PET9 ARO4 LEU2 ITR1 DLD3 CHO1 LPD1 OPT1<br>MHO1 SPE1 THI7 LSC1                                                |
| <a href="#">Mot3p</a>   | 10.81% | 0.68% | 1.86E-01 | PET9 LEU2 CHO1 THI7                                                                                           |
| <a href="#">Rtg1p</a>   | 5.41%  | 0.69% | 1.89E-01 | DLD3 LSC1                                                                                                     |
| <a href="#">Yap1p</a>   | 54.05% | 0.58% | 1.98E-01 | PET9 ERT1 ARO4 ILV6 LYS14 SDH4 FCF1 ITR1<br>CAB1 DLD3 CHO1 YHI9 PAN5 YIL165C RPB4 MHO1<br>OPI3 MOG1 SPE1 ARG7 |
| <a href="#">Mss11p</a>  | 10.81% | 0.66% | 2.02E-01 | LEU2 FCF1 PAN5 OPT1                                                                                           |
| <a href="#">Mig1p</a>   | 8.11%  | 0.66% | 2.06E-01 | MCY1 DOG2 ARG7                                                                                                |
| <a href="#">Cst6p</a>   | 43.24% | 0.59% | 2.14E-01 | ARO4 ILV6 SDH4 FCF1 ITR1 CHO1 MCY1 YHI9<br>PAN5 RPB4 OPT1 MHO1 OPI3 THI7 LSC1 LIP5                            |
| <a href="#">Cin5p</a>   | 35.14% | 0.60% | 2.14E-01 | PET9 LEU2 LYS14 FCF1 ITR1 DLD3 AIM13 YHI9<br>PAN5 OPT1 MHO1 THI7 ARG7                                         |
| <a href="#">Mac1p</a>   | 8.11%  | 0.65% | 2.19E-01 | SDH4 YHI9 PHO85                                                                                               |
| <a href="#">Pip2p</a>   | 21.62% | 0.61% | 2.25E-01 | PET9 LEU2 FCF1 DLD3 AIM13 CIR1 RPB4 THI7                                                                      |
| <a href="#">Rpi1p</a>   | 2.70%  | 0.57% | 2.28E-01 | <a href="#">YIL165C</a>                                                                                       |
| <a href="#">Uga3p</a>   | 5.41%  | 0.63% | 2.28E-01 | FCF1 ARG7                                                                                                     |
| <a href="#">Gcr2p</a>   | 21.62% | 0.61% | 2.30E-01 | ERT1 LYS14 SDH4 DLD3 OPT1 MHO1 SPE1 ARG7                                                                      |
| <a href="#">Crz1p</a>   | 10.81% | 0.63% | 2.34E-01 | LEU2 NHP10 FCF1 OPI3                                                                                          |
| <a href="#">Plm2p</a>   | 2.70%  | 0.54% | 2.49E-01 | <a href="#">PHO85</a>                                                                                         |
| <a href="#">Ash1p</a>   | 48.65% | 0.56% | 2.57E-01 | PET9 ARO4 ILV6 LEU2 NHP10 LYS14 SDH4 SBE2<br>ITR1 LPD1 MCY1 CIR1 DOG2 PAN5 MOG1 THI7<br>ARG7 LIP5             |
| <a href="#">Wtm1p</a>   | 2.70%  | 0.53% | 2.57E-01 | <a href="#">ARG7</a>                                                                                          |
| <a href="#">Azf1p</a>   | 2.70%  | 0.51% | 2.74E-01 | <a href="#">PET9</a>                                                                                          |
| <a href="#">Dal80p</a>  | 2.70%  | 0.50% | 2.80E-01 | <a href="#">YHI9</a>                                                                                          |
| <a href="#">Ifh1p</a>   | 8.11%  | 0.58% | 2.82E-01 | DLD3 RSC8 YHI9                                                                                                |
| <a href="#">Fzf1p</a>   | 2.70%  | 0.49% | 2.86E-01 | <a href="#">MCY1</a>                                                                                          |
| <a href="#">Rlm1p</a>   | 10.81% | 0.56% | 3.09E-01 | ITR1 RSC8 MHO1 ARG7                                                                                           |
| <a href="#">Gat4p</a>   | 2.70%  | 0.46% | 3.13E-01 | <a href="#">THI7</a>                                                                                          |
| <a href="#">Tda9p</a>   | 2.70%  | 0.45% | 3.25E-01 | <a href="#">MCY1</a>                                                                                          |
| <a href="#">Gis1p</a>   | 5.41%  | 0.51% | 3.33E-01 | ITR1 THI7                                                                                                     |
| <a href="#">Rgm1p</a>   | 5.41%  | 0.51% | 3.38E-01 | SDH4 AIM13                                                                                                    |
| <a href="#">Cup2p</a>   | 8.11%  | 0.52% | 3.53E-01 | SDH4 DLD3 MCY1                                                                                                |
| <a href="#">Tos8p</a>   | 5.41%  | 0.49% | 3.56E-01 | CHO1 AIM13                                                                                                    |
| <a href="#">Sef1p</a>   | 2.70%  | 0.40% | 3.78E-01 | <a href="#">PDP3</a>                                                                                          |
| <a href="#">Fkh1p</a>   | 37.84% | 0.53% | 3.82E-01 | PET9 LEU2 SDH4 DLD3 CHO1 RSC8 MNT2 DOG2<br>OPT1 MHO1 OPI3 THI7 PDP3 ARG7                                      |
| <a href="#">Hac1p</a>   | 8.11%  | 0.50% | 3.84E-01 | DOG2 OPT1 OPI3                                                                                                |

|                        |        |       |          |                                                                                      |
|------------------------|--------|-------|----------|--------------------------------------------------------------------------------------|
| <a href="#">Cbf1p</a>  | 21.62% | 0.52% | 3.93E-01 | ARO4 CAB1 LPD1 RSC8 YIL165C OPT1 MOG1 PDP3                                           |
| <a href="#">Rsf2p</a>  | 5.41%  | 0.46% | 3.93E-01 | PET9 YHI9                                                                            |
| <a href="#">Sum1p</a>  | 8.11%  | 0.48% | 4.03E-01 | MCY1 THI7 PHO85                                                                      |
| <a href="#">Hsf1p</a>  | 24.32% | 0.52% | 4.15E-01 | ARO4 DLD3 MCY1 CIR1 YIL165C OPT1 MHO1 OPI3 ARG7                                      |
| <a href="#">Dal82p</a> | 10.81% | 0.49% | 4.16E-01 | LYS14 YIL165C OPI3 MOG1                                                              |
| <a href="#">Haa1p</a>  | 8.11%  | 0.45% | 4.62E-01 | SDH4 MCY1 PDP3                                                                       |
| <a href="#">Urc2p</a>  | 2.70%  | 0.33% | 4.69E-01 | <a href="#">FCF1</a>                                                                 |
| <a href="#">Yox1p</a>  | 18.92% | 0.49% | 4.69E-01 | ILV6 FCF1 DLD3 AIM13 MNT2 OPI3 ARG7                                                  |
| <a href="#">Skn7p</a>  | 13.51% | 0.47% | 4.76E-01 | PET9 ILV6 LEU2 THI7 PHO85                                                            |
| <a href="#">Pdr1p</a>  | 18.92% | 0.49% | 4.79E-01 | DLD3 CHO1 RSC8 YHI9 ARG7 YOR131C LSC1                                                |
| <a href="#">Yrr1p</a>  | 16.22% | 0.47% | 5.10E-01 | LEU2 FCF1 CAB1 LPD1 AIM13 MCY1                                                       |
| <a href="#">Yhp1p</a>  | 16.22% | 0.47% | 5.13E-01 | ILV6 FCF1 DLD3 MNT2 OPI3 ARG7                                                        |
| <a href="#">Aft2p</a>  | 5.41%  | 0.38% | 5.17E-01 | MNT2 MCY1                                                                            |
| <a href="#">Sko1p</a>  | 10.81% | 0.43% | 5.35E-01 | LEU2 FCF1 MNT2 MCY1                                                                  |
| <a href="#">Mth1p</a>  | 2.70%  | 0.29% | 5.44E-01 | <a href="#">MCY1</a>                                                                 |
| <a href="#">Pdr3p</a>  | 13.51% | 0.42% | 5.88E-01 | DLD3 RSC8 YHI9 PAN5 ARG7                                                             |
| <a href="#">Hap2p</a>  | 18.92% | 0.43% | 6.22E-01 | PET9 SDH4 SBE2 LPD1 THI7 PDP3 ARG7                                                   |
| <a href="#">Reb1p</a>  | 10.81% | 0.39% | 6.23E-01 | ARO4 MCY1 ARG7 LIP5                                                                  |
| <a href="#">Adr1p</a>  | 8.11%  | 0.36% | 6.37E-01 | PET9 YHI9 LSC1                                                                       |
| <a href="#">Fkh2p</a>  | 24.32% | 0.44% | 6.45E-01 | PET9 ARO4 LEU2 FCF1 SBE2 MNT2 OPI3 MOG1 THI7                                         |
| <a href="#">Rme1p</a>  | 2.70%  | 0.24% | 6.46E-01 | <a href="#">THI7</a>                                                                 |
| <a href="#">Fhl1p</a>  | 13.51% | 0.40% | 6.49E-01 | LEU2 ITR1 DLD3 RSC8 YHI9                                                             |
| <a href="#">Mal33p</a> | 5.41%  | 0.31% | 6.58E-01 | MHO1 SPE1                                                                            |
| <a href="#">Hcm1p</a>  | 2.70%  | 0.23% | 6.69E-01 | <a href="#">PDP3</a>                                                                 |
| <a href="#">Yap5p</a>  | 8.11%  | 0.34% | 6.83E-01 | MHO1 ARG7 PHO85                                                                      |
| <a href="#">Rfx1p</a>  | 5.41%  | 0.28% | 7.22E-01 | PET9 SPE1                                                                            |
| <a href="#">Rph1p</a>  | 5.41%  | 0.28% | 7.28E-01 | SDH4 MCY1                                                                            |
| <a href="#">Tbf1p</a>  | 2.70%  | 0.20% | 7.49E-01 | <a href="#">PDP3</a>                                                                 |
| <a href="#">Yap6p</a>  | 8.11%  | 0.31% | 7.65E-01 | PET9 DLD3 MHO1                                                                       |
| <a href="#">Ecm22p</a> | 2.70%  | 0.19% | 7.75E-01 | <a href="#">CAB1</a>                                                                 |
| <a href="#">Ndt80p</a> | 2.70%  | 0.17% | 8.09E-01 | <a href="#">THI7</a>                                                                 |
| <a href="#">Msn4p</a>  | 27.03% | 0.39% | 8.33E-01 | ARO4 LEU2 LYS14 CAB1 DLD3 DOG2 RPB4 MHO1 OPI3 THI7                                   |
| <a href="#">Tec1p</a>  | 43.24% | 0.42% | 8.63E-01 | PET9 LYS14 SDH4 SBE2 ITR1 CHO1 MNT2 PAN5 YIL165C OPT1 OPI3 THI7 PDP3 ARG7 LSC1 PHO85 |
| <a href="#">Spt23p</a> | 16.22% | 0.33% | 8.72E-01 | DLD3 DOG2 MHO1 OPI3 MOG1 PHO85                                                       |
| <a href="#">Aft1p</a>  | 10.81% | 0.28% | 8.80E-01 | DLD3 CHO1 MCY1 ARG7                                                                  |
| <a href="#">Mbp1p</a>  | 2.70%  | 0.14% | 8.90E-01 | <a href="#">SPE1</a>                                                                 |
| <a href="#">Mcm1p</a>  | 13.51% | 0.30% | 8.96E-01 | ITR1 LPD1 YIL165C OPT1 ARG7                                                          |
| <a href="#">Msn2p</a>  | 35.14% | 0.38% | 9.19E-01 | LEU2 LYS14 FCF1 ITR1 CAB1 DLD3 AIM13 DOG2 RPB4 OPT1 MHO1 OPI3 THI7                   |
| <a href="#">Mga2p</a>  | 5.41%  | 0.18% | 9.42E-01 | ARO4 PDP3                                                                            |

## Subnetwork 2

| Transcription Factor    | % in user set | % in Yeastract | p-value  | Target ORF/Genes                                                                                      |
|-------------------------|---------------|----------------|----------|-------------------------------------------------------------------------------------------------------|
| <a href="#">Plm2p</a>   | 12.50%        | 1.62%          | 3.10E-03 | RFT1 ROT2 IME4                                                                                        |
| <a href="#">Mcm1p</a>   | 45.83%        | 0.66%          | 4.06E-03 | SLA1 SCO1 SLM4 GRS1 PGI1 PRO3 MDJ1 PRM8<br>IME4 NUC1 TUM1                                             |
| <a href="#">Ndd1p</a>   | 8.33%         | 1.80%          | 5.85E-03 | SCO1 SLM4                                                                                             |
| <a href="#">Ime1p</a>   | 8.33%         | 1.61%          | 7.95E-03 | GRS1 IME4                                                                                             |
| <a href="#">Ste12p</a>  | 75.00%        | 0.47%          | 9.82E-03 | SLA1 PEP1 NUP170 FLR1 SLM4 PGI1 PCS60<br>ROT2 IMG2 TIM9 PRO3 MDJ1 PRM8 IME4 SIP2<br>NUC1 MRPL20 MRPS8 |
| <a href="#">Gcr1p</a>   | 41.67%        | 0.61%          | 1.10E-02 | SLA1 NUP170 SCO1 GRS1 PGI1 IMG2 PRO3<br>MDJ1 IME4 TUM1                                                |
| <a href="#">Reb1p</a>   | 29.17%        | 0.69%          | 1.47E-02 | PCS60 ROT2 PRO3 MDJ1 PRM8 IME4 SIP2                                                                   |
| <a href="#">Rtg1p</a>   | 12.50%        | 1.03%          | 1.49E-02 | SLA1 MDJ1 SIP2                                                                                        |
| <a href="#">Tye7p</a>   | 33.33%        | 0.65%          | 1.51E-02 | PEP1 FLR1 PGI1 PCS60 IMG2 MDJ1 DMA1<br>MRPL20                                                         |
| <a href="#">YKL222C</a> | 4.17%         | 1.67%          | 1.71E-02 | <a href="#">NUP170</a>                                                                                |
| <a href="#">Abf1p</a>   | 58.33%        | 0.50%          | 1.89E-02 | SLA1 NUP170 FLR1 SLM4 GRS1 PGI1 PCS60<br>IMG2 PRO3 MDJ1 PRM8 IME4 DMA1 TUM1                           |
| <a href="#">Msn2p</a>   | 66.67%        | 0.47%          | 1.96E-02 | SLA1 PEP1 NUP170 FLR1 SCO1 SLM4 PGI1 IMG2<br>TIM9 FMP10 MDJ1 PRM8 SIP2 NUC1 MRPL20<br>MRPS8           |
| <a href="#">Yap5p</a>   | 25.00%        | 0.68%          | 2.17E-02 | FLR1 SCO1 PGI1 FMP10 MDJ1 SIP2                                                                        |
| <a href="#">Mal13p</a>  | 4.17%         | 1.45%          | 2.22E-02 | <a href="#">SCO1</a>                                                                                  |
| <a href="#">YGR067C</a> | 8.33%         | 1.09%          | 2.26E-02 | MDJ1 MRPS8                                                                                            |
| <a href="#">Wtm1p</a>   | 8.33%         | 1.06%          | 2.46E-02 | RFT1 FLR1                                                                                             |
| <a href="#">Tos4p</a>   | 8.33%         | 0.99%          | 2.92E-02 | PRO3 TUM1                                                                                             |
| <a href="#">Stb5p</a>   | 29.17%        | 0.60%          | 3.13E-02 | NUP170 FLR1 PGI1 PRO3 PRM8 DMA1 NUC1                                                                  |
| <a href="#">Stb4p</a>   | 4.17%         | 1.18%          | 3.27E-02 | <a href="#">PCS60</a>                                                                                 |
| <a href="#">Rap1p</a>   | 58.33%        | 0.47%          | 3.50E-02 | RFT1 NUP170 FLR1 SCO1 SLM4 GRS1 PGI1 ROT2<br>IMG2 TIM9 PRO3 MDJ1 SIP2 MRPL20                          |
| <a href="#">Cst6p</a>   | 54.17%        | 0.48%          | 3.67E-02 | RFT1 NUP170 GRS1 PGI1 ROT2 IMG2 PRO3<br>MDJ1 PRM8 DMA1 NUC1 MRPS8 TUM1                                |
| <a href="#">Cat8p</a>   | 8.33%         | 0.87%          | 4.02E-02 | PGI1 PRO3                                                                                             |
| <a href="#">Arg80p</a>  | 12.50%        | 0.76%          | 4.12E-02 | RFT1 PRM8 NUC1                                                                                        |
| <a href="#">Rgm1p</a>   | 12.50%        | 0.76%          | 4.12E-02 | NUP170 PRM8 NUC1                                                                                      |
| <a href="#">Sip4p</a>   | 8.33%         | 0.81%          | 4.86E-02 | PGI1 PRO3                                                                                             |
| <a href="#">Msn4p</a>   | 50.00%        | 0.47%          | 5.24E-02 | NUP170 FLR1 SCO1 GRS1 PGI1 IMG2 FMP10<br>MDJ1 PRM8 MRPL20 MRPS8 TUM1                                  |
| <a href="#">Skn7p</a>   | 25.00%        | 0.57%          | 5.40E-02 | SLM4 GRS1 IMG2 MDJ1 SIP2 MRPS8                                                                        |
| <a href="#">Mig1p</a>   | 12.50%        | 0.66%          | 6.21E-02 | GRS1 MDJ1 MRPL20                                                                                      |
| <a href="#">Put3p</a>   | 16.67%        | 0.61%          | 6.45E-02 | PGI1 PRO3 DMA1 MRPS8                                                                                  |
| <a href="#">Mac1p</a>   | 12.50%        | 0.65%          | 6.71E-02 | GRS1 PRM8 NUC1                                                                                        |
| <a href="#">Aca1p</a>   | 8.33%         | 0.70%          | 6.88E-02 | SIP2 MRPS8                                                                                            |
| <a href="#">Usv1p</a>   | 4.17%         | 0.75%          | 7.39E-02 | <a href="#">PCS60</a>                                                                                 |

|                        |        |       |          |                                                                                                |
|------------------------|--------|-------|----------|------------------------------------------------------------------------------------------------|
| <a href="#">Yap7p</a>  | 16.67% | 0.58% | 7.72E-02 | FLR1 PGI1 MDJ1 DMA1                                                                            |
| <a href="#">Rgt1p</a>  | 12.50% | 0.60% | 8.25E-02 | PGI1 PRO3 MRPS8                                                                                |
| <a href="#">Aft2p</a>  | 12.50% | 0.57% | 9.44E-02 | SLM4 MDJ1 DMA1                                                                                 |
| <a href="#">Ino4p</a>  | 29.17% | 0.48% | 1.00E-01 | SCO1 IMG2 MDJ1 SIP2 DMA1 MRPL20 MRPS8                                                          |
| <a href="#">Hms1p</a>  | 20.83% | 0.50% | 1.06E-01 | PEP1 PGI1 PCS60 MDJ1 SIP2                                                                      |
| <a href="#">Wtm2p</a>  | 4.17%  | 0.59% | 1.10E-01 | <a href="#">NUC1</a>                                                                           |
| <a href="#">Sfp1p</a>  | 70.83% | 0.39% | 1.10E-01 | SLA1 PEP1 RFT1 FLR1 SCO1 SLM4 GRS1 PGI1<br>PCS60 IMG2 PRO3 FMP10 PRM8 IME4 SIP2<br>NUC1 MRPL20 |
| <a href="#">Rpi1p</a>  | 4.17%  | 0.57% | 1.15E-01 | <a href="#">NUC1</a>                                                                           |
| <a href="#">Rds2p</a>  | 12.50% | 0.53% | 1.15E-01 | PGI1 MDJ1 DMA1                                                                                 |
| <a href="#">Ndt80p</a> | 12.50% | 0.52% | 1.21E-01 | GRS1 DMA1 TUM1                                                                                 |
| <a href="#">Thi2p</a>  | 16.67% | 0.50% | 1.23E-01 | PGI1 IMG2 DMA1 TUM1                                                                            |
| <a href="#">Yrm1p</a>  | 45.83% | 0.42% | 1.24E-01 | RFT1 FLR1 SCO1 IMG2 TIM9 MDJ1 IME4 SIP2<br>DMA1 NUC1 MRPS8                                     |
| <a href="#">Sut2p</a>  | 4.17%  | 0.54% | 1.29E-01 | <a href="#">MDJ1</a>                                                                           |
| <a href="#">Fkh1p</a>  | 45.83% | 0.42% | 1.32E-01 | NUP170 FLR1 SLM4 GRS1 PGI1 IMG2 TIM9<br>PRM8 IME4 DMA1 TUM1                                    |
| <a href="#">Opi1p</a>  | 8.33%  | 0.52% | 1.35E-01 | MDJ1 NUC1                                                                                      |
| <a href="#">Adr1p</a>  | 16.67% | 0.48% | 1.38E-01 | SLM4 PCS60 MDJ1 DMA1                                                                           |
| <a href="#">Tup1p</a>  | 45.83% | 0.41% | 1.42E-01 | SLA1 RFT1 FLR1 GRS1 PGI1 TIM9 PRO3 MDJ1<br>IME4 DMA1 NUC1                                      |
| <a href="#">Arr1p</a>  | 29.17% | 0.44% | 1.51E-01 | SCO1 GRS1 PCS60 ROT2 MDJ1 SIP2 TUM1                                                            |
| <a href="#">Gcn4p</a>  | 50.00% | 0.40% | 1.58E-01 | RFT1 FLR1 SCO1 SLM4 IMG2 TIM9 MDJ1 PRM8<br>IME4 NUC1 MRPL20 MRPS8                              |
| <a href="#">Crz1p</a>  | 12.50% | 0.47% | 1.63E-01 | SLM4 MDJ1 PRM8                                                                                 |
| <a href="#">Mal33p</a> | 12.50% | 0.47% | 1.63E-01 | RFT1 SLM4 MRPL20                                                                               |
| <a href="#">Aro80p</a> | 8.33%  | 0.47% | 1.72E-01 | PGI1 MRPS8                                                                                     |
| <a href="#">Gat1p</a>  | 4.17%  | 0.44% | 1.77E-01 | <a href="#">RFT1</a>                                                                           |
| <a href="#">Ino2p</a>  | 12.50% | 0.45% | 1.77E-01 | SLA1 SCO1 MDJ1                                                                                 |
| <a href="#">Ert1p</a>  | 4.17%  | 0.44% | 1.79E-01 | <a href="#">MDJ1</a>                                                                           |
| <a href="#">Gat3p</a>  | 8.33%  | 0.45% | 1.88E-01 | GRS1 TIM9                                                                                      |
| <a href="#">Hap5p</a>  | 8.33%  | 0.44% | 1.90E-01 | PGI1 MDJ1                                                                                      |
| <a href="#">Pdr3p</a>  | 20.83% | 0.42% | 1.93E-01 | SLA1 FLR1 SLM4 TIM9 NUC1                                                                       |
| <a href="#">Gln3p</a>  | 20.83% | 0.42% | 1.99E-01 | GRS1 PGI1 SIP2 DMA1 MRPS8                                                                      |
| <a href="#">Sok2p</a>  | 37.50% | 0.40% | 1.99E-01 | SLM4 GRS1 TIM9 PRO3 FMP10 MDJ1 PRM8<br>IME4 SIP2                                               |
| <a href="#">Sef1p</a>  | 4.17%  | 0.40% | 2.07E-01 | <a href="#">GRS1</a>                                                                           |
| <a href="#">Ume6p</a>  | 25.00% | 0.41% | 2.11E-01 | PGI1 IMG2 TIM9 IME4 MRPL20 MRPS8                                                               |
| <a href="#">Gal4p</a>  | 20.83% | 0.41% | 2.14E-01 | PGI1 PCS60 IMG2 SIP2 DMA1                                                                      |
| <a href="#">Asg1p</a>  | 4.17%  | 0.39% | 2.15E-01 | <a href="#">NUC1</a>                                                                           |
| <a href="#">Rds1p</a>  | 4.17%  | 0.38% | 2.19E-01 | <a href="#">IMG2</a>                                                                           |
| <a href="#">Fkh2p</a>  | 33.33% | 0.39% | 2.25E-01 | FLR1 SCO1 SLM4 GRS1 PGI1 IMG2 TIM9 NUC1                                                        |
| <a href="#">Ash1p</a>  | 50.00% | 0.38% | 2.32E-01 | PEP1 NUP170 SCO1 GRS1 PGI1 ROT2 PRO3<br>PRM8 IME4 SIP2 MRPL20 MRPS8                            |
| <a href="#">Rpn4p</a>  | 29.17% | 0.39% | 2.35E-01 | SLA1 PEP1 FLR1 GRS1 PGI1 PCS60 MDJ1                                                            |
| <a href="#">Tbf1p</a>  | 8.33%  | 0.40% | 2.40E-01 | NUP170 SCO1                                                                                    |

|                         |        |       |          |                                                                                                   |
|-------------------------|--------|-------|----------|---------------------------------------------------------------------------------------------------|
| <a href="#">Msn1p</a>   | 4.17%  | 0.35% | 2.51E-01 | <a href="#">MDJ1</a>                                                                              |
| <a href="#">Yrr1p</a>   | 20.83% | 0.39% | 2.55E-01 | FLR1 SCO1 MDJ1 IME4 SIP2                                                                          |
| <a href="#">Spt23p</a>  | 29.17% | 0.38% | 2.57E-01 | PGI1 ROT2 MDJ1 PRM8 IME4 SIP2 DMA1                                                                |
| <a href="#">Pip2p</a>   | 20.83% | 0.38% | 2.68E-01 | PGI1 PCS60 IMG2 SIP2 DMA1                                                                         |
| <a href="#">Urc2p</a>   | 4.17%  | 0.33% | 2.70E-01 | <a href="#">SLM4</a>                                                                              |
| <a href="#">Ace2p</a>   | 70.83% | 0.36% | 2.73E-01 | SLA1 PEP1 NUP170 FLR1 SCO1 SLM4 GRS1 PGI1<br>PCS60 ROT2 IMG2 FMP10 MDJ1 SIP2 NUC1<br>MRPL20 MRPS8 |
| <a href="#">Hap3p</a>   | 4.17%  | 0.33% | 2.75E-01 | <a href="#">IME4</a>                                                                              |
| <a href="#">Sut1p</a>   | 8.33%  | 0.36% | 2.81E-01 | PCS60 FMP10                                                                                       |
| <a href="#">Swi4p</a>   | 16.67% | 0.37% | 2.86E-01 | SLM4 MDJ1 PRM8 MRPS8                                                                              |
| <a href="#">Dal82p</a>  | 12.50% | 0.37% | 2.90E-01 | NUP170 PRM8 TUM1                                                                                  |
| <a href="#">Uga3p</a>   | 4.17%  | 0.31% | 2.92E-01 | <a href="#">PRM8</a>                                                                              |
| <a href="#">Yap3p</a>   | 4.17%  | 0.30% | 3.12E-01 | <a href="#">MRPS8</a>                                                                             |
| <a href="#">Mot3p</a>   | 8.33%  | 0.34% | 3.18E-01 | NUP170 PGI1                                                                                       |
| <a href="#">Nrg2p</a>   | 4.17%  | 0.29% | 3.27E-01 | <a href="#">MRPS8</a>                                                                             |
| <a href="#">Hap1p</a>   | 4.17%  | 0.29% | 3.28E-01 | <a href="#">PRM8</a>                                                                              |
| <a href="#">Arg81p</a>  | 4.17%  | 0.29% | 3.31E-01 | <a href="#">IMG2</a>                                                                              |
| <a href="#">Mss11p</a>  | 8.33%  | 0.33% | 3.34E-01 | NUP170 MDJ1                                                                                       |
| <a href="#">Yox1p</a>   | 20.83% | 0.35% | 3.46E-01 | SLM4 MDJ1 PRM8 SIP2 DMA1                                                                          |
| <a href="#">Pdr1p</a>   | 20.83% | 0.35% | 3.53E-01 | FLR1 SLM4 TIM9 FMP10 NUC1                                                                         |
| <a href="#">Rox1p</a>   | 12.50% | 0.33% | 3.62E-01 | SCO1 PRM8 TUM1                                                                                    |
| <a href="#">Sko1p</a>   | 12.50% | 0.32% | 3.80E-01 | FLR1 MDJ1 PRM8                                                                                    |
| <a href="#">Rtg3p</a>   | 8.33%  | 0.30% | 4.00E-01 | NUP170 FLR1                                                                                       |
| <a href="#">Tos8p</a>   | 4.17%  | 0.25% | 4.03E-01 | <a href="#">SLM4</a>                                                                              |
| <a href="#">Met31p</a>  | 4.17%  | 0.25% | 4.03E-01 | <a href="#">IME4</a>                                                                              |
| <a href="#">Fhl1p</a>   | 16.67% | 0.32% | 4.13E-01 | PGI1 ROT2 TIM9 MDJ1                                                                               |
| <a href="#">Flo8p</a>   | 12.50% | 0.31% | 4.22E-01 | PRO3 FMP10 MDJ1                                                                                   |
| <a href="#">Rsf2p</a>   | 4.17%  | 0.23% | 4.34E-01 | <a href="#">MRPS8</a>                                                                             |
| <a href="#">Hcm1p</a>   | 4.17%  | 0.23% | 4.35E-01 | <a href="#">PRO3</a>                                                                              |
| <a href="#">Rlm1p</a>   | 8.33%  | 0.28% | 4.36E-01 | PCS60 PRM8                                                                                        |
| <a href="#">Rim101p</a> | 25.00% | 0.32% | 4.38E-01 | PGI1 IMG2 MDJ1 MRPL20 MRPS8 TUM1                                                                  |
| <a href="#">Nrg1p</a>   | 8.33%  | 0.28% | 4.46E-01 | TIM9 MRPS8                                                                                        |
| <a href="#">Cin5p</a>   | 29.17% | 0.32% | 4.60E-01 | FLR1 PGI1 PCS60 PRM8 SIP2 DMA1 NUC1                                                               |
| <a href="#">Gcr2p</a>   | 16.67% | 0.30% | 4.61E-01 | PGI1 PCS60 PRM8 NUC1                                                                              |
| <a href="#">Mig3p</a>   | 20.83% | 0.30% | 5.05E-01 | FLR1 PGI1 ROT2 PRO3 MDJ1                                                                          |
| <a href="#">Cup9p</a>   | 12.50% | 0.28% | 5.09E-01 | PGI1 PCS60 DMA1                                                                                   |
| <a href="#">Cad1p</a>   | 8.33%  | 0.25% | 5.13E-01 | FLR1 MDJ1                                                                                         |
| <a href="#">Mga2p</a>   | 12.50% | 0.27% | 5.25E-01 | PGI1 MDJ1 PRM8                                                                                    |
| <a href="#">Aft1p</a>   | 16.67% | 0.28% | 5.26E-01 | PGI1 PCS60 MDJ1 IME4                                                                              |
| <a href="#">Pho4p</a>   | 16.67% | 0.28% | 5.28E-01 | TIM9 IME4 DMA1 MRPL20                                                                             |
| <a href="#">Ecm22p</a>  | 4.17%  | 0.19% | 5.44E-01 | <a href="#">GRS1</a>                                                                              |
| <a href="#">Met32p</a>  | 4.17%  | 0.18% | 5.62E-01 | <a href="#">PCS60</a>                                                                             |
| <a href="#">Oaf1p</a>   | 8.33%  | 0.22% | 5.92E-01 | PCS60 MDJ1                                                                                        |
| <a href="#">Sum1p</a>   | 4.17%  | 0.16% | 6.30E-01 | <a href="#">PGI1</a>                                                                              |
| <a href="#">Yhp1p</a>   | 12.50% | 0.23% | 6.53E-01 | MDJ1 PRM8 DMA1                                                                                    |
| <a href="#">Yap6p</a>   | 8.33%  | 0.20% | 6.57E-01 | SLM4 MDJ1                                                                                         |

|                       |        |       |          |                                                               |
|-----------------------|--------|-------|----------|---------------------------------------------------------------|
| <a href="#">Hap2p</a> | 16.67% | 0.25% | 6.61E-01 | SLM4 GRS1 IMG2 MRPL20                                         |
| <a href="#">Leu3p</a> | 4.17%  | 0.15% | 6.70E-01 | <a href="#">MDJ1</a>                                          |
| <a href="#">Hap4p</a> | 8.33%  | 0.20% | 6.73E-01 | PRO3 IME4                                                     |
| <a href="#">Haa1p</a> | 4.17%  | 0.15% | 6.73E-01 | <a href="#">GRS1</a>                                          |
| <a href="#">Swi5p</a> | 20.83% | 0.26% | 6.74E-01 | GRS1 PGI1 NUC1 MRPL20 MRPS8                                   |
| <a href="#">Yap1p</a> | 41.67% | 0.29% | 6.77E-01 | SLA1 RFT1 NUP170 FLR1 SCO1 GRS1 ROT2 MDJ1<br>PRM8 TUM1        |
| <a href="#">Mbp1p</a> | 4.17%  | 0.14% | 6.96E-01 | <a href="#">SLM4</a>                                          |
| <a href="#">Mga1p</a> | 4.17%  | 0.14% | 7.01E-01 | <a href="#">PRM8</a>                                          |
| <a href="#">Tec1p</a> | 45.83% | 0.29% | 7.11E-01 | PEP1 RFT1 NUP170 SLM4 MDJ1 PRM8 IME4<br>SIP2 DMA1 NUC1 MRPL20 |
| <a href="#">Pho2p</a> | 8.33%  | 0.19% | 7.24E-01 | PGI1 TIM9                                                     |
| <a href="#">Xbp1p</a> | 12.50% | 0.21% | 7.25E-01 | PEP1 GRS1 PRM8                                                |
| <a href="#">Ixr1p</a> | 16.67% | 0.23% | 7.28E-01 | FLR1 IME4 DMA1 TUM1                                           |
| <a href="#">Hsf1p</a> | 16.67% | 0.23% | 7.31E-01 | SCO1 PGI1 MDJ1 PRM8                                           |
| <a href="#">Phd1p</a> | 4.17%  | 0.13% | 7.45E-01 | <a href="#">PGI1</a>                                          |
| <a href="#">Cbf1p</a> | 12.50% | 0.20% | 7.87E-01 | PCS60 PRM8 SIP2                                               |
| <a href="#">Kar4p</a> | 4.17%  | 0.12% | 8.05E-01 | <a href="#">IME4</a>                                          |
| <a href="#">Zap1p</a> | 8.33%  | 0.13% | 9.17E-01 | PGI1 PRM8                                                     |
| <a href="#">Bas1p</a> | 25.00% | 0.20% | 9.35E-01 | GRS1 PGI1 PCS60 FMP10 MDJ1 PRM8                               |



Subnetwork 3

| Transcription Factor   | % in user set | % in Yeasttract | p-value  | Target ORF/Genes                                                                     |
|------------------------|---------------|-----------------|----------|--------------------------------------------------------------------------------------|
| <a href="#">Mig1p</a>  | 37.50%        | 1.32%           | 2.75E-05 | TIP1 RTC2 ICS2 RGD2 RPI1 BNA1                                                        |
| <a href="#">Ste12p</a> | 93.75%        | 0.39%           | 5.18E-05 | TIP1 RTC2 ICS2 NUR1 MKC7 RGD2 ATE1 HOS4<br>RPI1 BNA1 BNA5 SST2 YML096W MED11<br>ECM3 |
| <a href="#">Mot3p</a>  | 37.50%        | 1.02%           | 1.49E-04 | TIP1 ICS2 RPI1 BNA1 SST2 ECM3                                                        |
| <a href="#">Stp2p</a>  | 37.50%        | 0.93%           | 2.62E-04 | TIP1 ICS2 RPI1 BNA5 SST2 ECM3                                                        |
| <a href="#">Nrg1p</a>  | 37.50%        | 0.83%           | 5.42E-04 | TIP1 RTC2 ICS2 NUR1 RPI1 MED11                                                       |
| <a href="#">Gcr2p</a>  | 50.00%        | 0.61%           | 7.81E-04 | TIP1 ICS2 BNA6 RPI1 BNA1 BNA5 SST2 ECM3                                              |
| <a href="#">Mga2p</a>  | 43.75%        | 0.63%           | 1.32E-03 | TIP1 RTC2 RPI1 BNA1 BNA5 SST2 ECM3                                                   |
| <a href="#">Tbs1p</a>  | 12.50%        | 1.96%           | 1.39E-03 | TIP1 HOS4                                                                            |
| <a href="#">Met28p</a> | 18.75%        | 1.30%           | 1.41E-03 | NUR1 MKC7 MED11                                                                      |
| <a href="#">Hms2p</a>  | 12.50%        | 1.74%           | 1.96E-03 | TIP1 RPI1                                                                            |
| <a href="#">Hcm1p</a>  | 25.00%        | 0.92%           | 2.05E-03 | NUR1 HOS4 RPI1 BNA5                                                                  |
| <a href="#">Gln3p</a>  | 43.75%        | 0.59%           | 2.11E-03 | TIP1 RTC2 ICS2 MKC7 RPI1 BNA1 SST2                                                   |
| <a href="#">Sko1p</a>  | 37.50%        | 0.65%           | 2.39E-03 | TIP1 ICS2 RGD2 RPI1 BNA1 SST2                                                        |
| <a href="#">Sok2p</a>  | 62.50%        | 0.44%           | 2.51E-03 | TIP1 RTC2 ICS2 BNA6 HOS4 RPI1 BNA1 SST2<br>YML096W ECM3                              |
| <a href="#">Ash1p</a>  | 75.00%        | 0.38%           | 3.18E-03 | TIP1 ICS2 NUR1 MKC7 BNA6 HOS4 RPI1 BNA1<br>BNA5 SST2 MED11 ECM3                      |
| <a href="#">Msn1p</a>  | 18.75%        | 1.05%           | 3.18E-03 | TIP1 RPI1 ECM3                                                                       |
| <a href="#">Yap6p</a>  | 37.50%        | 0.61%           | 3.26E-03 | TIP1 ICS2 MKC7 BNA6 RPI1 SST2                                                        |
| <a href="#">Ifh1p</a>  | 25.00%        | 0.77%           | 4.49E-03 | TIP1 ICS2 RPI1 BNA1                                                                  |
| <a href="#">Dot6p</a>  | 12.50%        | 1.26%           | 4.92E-03 | ICS2 BNA5                                                                            |
| <a href="#">Ixr1p</a>  | 50.00%        | 0.46%           | 6.05E-03 | TIP1 ICS2 RGD2 BNA6 ATE1 RPI1 BNA5<br>YML096W                                        |
| <a href="#">Nrg2p</a>  | 18.75%        | 0.86%           | 6.29E-03 | TIP1 RTC2 RPI1                                                                       |
| <a href="#">Stp4p</a>  | 12.50%        | 1.14%           | 6.53E-03 | BNA5 ECM3                                                                            |
| <a href="#">Msn2p</a>  | 75.00%        | 0.35%           | 6.72E-03 | TIP1 RTC2 ICS2 NUR1 MKC7 RGD2 ATE1 RPI1<br>BNA1 SST2 YML096W ECM3                    |
| <a href="#">Msn4p</a>  | 62.50%        | 0.39%           | 7.85E-03 | TIP1 RTC2 ICS2 NUR1 MKC7 BNA6 ATE1 RPI1<br>SST2 ECM3                                 |
| <a href="#">Bas1p</a>  | 68.75%        | 0.37%           | 7.94E-03 | TIP1 RTC2 ICS2 MKC7 HOS4 RPI1 BNA1 BNA5<br>SST2 YML096W ECM3                         |
| <a href="#">Kar4p</a>  | 31.25%        | 0.58%           | 8.34E-03 | TIP1 RTC2 ICS2 NUR1 BNA1                                                             |
| <a href="#">Stb5p</a>  | 37.50%        | 0.52%           | 8.84E-03 | TIP1 ICS2 MKC7 RGD2 RPI1 YML096W                                                     |
| <a href="#">Pdr8p</a>  | 6.25%         | 1.54%           | 9.04E-03 | <a href="#">TIP1</a>                                                                 |
| <a href="#">Sum1p</a>  | 25.00%        | 0.65%           | 9.49E-03 | RTC2 BNA6 BNA1 BNA5                                                                  |
| <a href="#">Rgm1p</a>  | 18.75%        | 0.76%           | 9.99E-03 | RPI1 SST2 ECM3                                                                       |
| <a href="#">Rox1p</a>  | 31.25%        | 0.55%           | 1.05E-02 | TIP1 MKC7 HOS4 RPI1 ECM3                                                             |
| <a href="#">Crz1p</a>  | 25.00%        | 0.63%           | 1.08E-02 | RPI1 BNA5 MED11 ECM3                                                                 |
| <a href="#">Oaf3p</a>  | 18.75%        | 0.71%           | 1.22E-02 | TIP1 ICS2 RPI1                                                                       |
| <a href="#">Leu3p</a>  | 25.00%        | 0.60%           | 1.28E-02 | ICS2 RPI1 BNA1 BNA5                                                                  |
| <a href="#">Gat1p</a>  | 12.50%        | 0.88%           | 1.31E-02 | NUR1 MKC7                                                                            |

|                         |        |       |          |                                                                              |
|-------------------------|--------|-------|----------|------------------------------------------------------------------------------|
| <a href="#">Cat8p</a>   | 12.50% | 0.87% | 1.34E-02 | TIP1 NUR1                                                                    |
| <a href="#">Ace2p</a>   | 87.50% | 0.29% | 1.45E-02 | TIP1 RTC2 ICS2 MKC7 RGD2 BNA6 HOS4 RPI1<br>BNA1 BNA5 SST2 YML096W MED11 ECM3 |
| <a href="#">Tod6p</a>   | 6.25%  | 1.19% | 1.48E-02 | <a href="#">ECM3</a>                                                         |
| <a href="#">Yhp1p</a>   | 37.50% | 0.47% | 1.55E-02 | TIP1 BNA6 RPI1 BNA1 SST2 ECM3                                                |
| <a href="#">Rlm1p</a>   | 25.00% | 0.56% | 1.69E-02 | TIP1 RTC2 ICS2 RPI1                                                          |
| <a href="#">Mac1p</a>   | 18.75% | 0.65% | 1.73E-02 | HOS4 BNA1 SST2                                                               |
| <a href="#">Mcm1p</a>   | 43.75% | 0.42% | 1.85E-02 | TIP1 ICS2 NUR1 BNA5 SST2 MED11 ECM3                                          |
| <a href="#">Sfp1p</a>   | 81.25% | 0.30% | 2.12E-02 | TIP1 RTC2 ICS2 NUR1 MKC7 RGD2 BNA6 RPI1<br>BNA1 BNA5 SST2 YML096W ECM3       |
| <a href="#">Rsc30p</a>  | 6.25%  | 0.98% | 2.13E-02 | <a href="#">BNA1</a>                                                         |
| <a href="#">Tec1p</a>   | 75.00% | 0.31% | 2.14E-02 | TIP1 RTC2 ICS2 NUR1 RGD2 ATE1 HOS4 RPI1<br>BNA1 BNA5 SST2 YML096W            |
| <a href="#">Xbp1p</a>   | 37.50% | 0.43% | 2.46E-02 | TIP1 BNA6 RPI1 BNA5 SST2 ECM3                                                |
| <a href="#">Ecm22p</a>  | 18.75% | 0.56% | 2.71E-02 | TIP1 ICS2 SST2                                                               |
| <a href="#">Gcn4p</a>   | 62.50% | 0.33% | 2.82E-02 | TIP1 RTC2 MKC7 RGD2 BNA6 RPI1 BNA1 BNA5<br>SST2 ECM3                         |
| <a href="#">Cin5p</a>   | 50.00% | 0.37% | 2.89E-02 | TIP1 RTC2 ICS2 RGD2 BNA6 RPI1 BNA1 MED11                                     |
| <a href="#">Mig2p</a>   | 12.50% | 0.65% | 2.91E-02 | ICS2 RPI1                                                                    |
| <a href="#">Usv1p</a>   | 6.25%  | 0.75% | 3.54E-02 | <a href="#">HOS4</a>                                                         |
| <a href="#">Cup2p</a>   | 18.75% | 0.52% | 3.56E-02 | RPI1 BNA1 SST2                                                               |
| <a href="#">Eds1p</a>   | 6.25%  | 0.74% | 3.64E-02 | <a href="#">ICS2</a>                                                         |
| <a href="#">YPR015C</a> | 6.25%  | 0.72% | 3.73E-02 | <a href="#">TIP1</a>                                                         |
| <a href="#">Mth1p</a>   | 12.50% | 0.58% | 3.99E-02 | SST2 MED11                                                                   |
| <a href="#">Hap1p</a>   | 12.50% | 0.57% | 4.02E-02 | TIP1 RTC2                                                                    |
| <a href="#">Sfl1p</a>   | 6.25%  | 0.68% | 4.24E-02 | <a href="#">MKC7</a>                                                         |
| <a href="#">Fhl1p</a>   | 31.25% | 0.40% | 4.65E-02 | ICS2 RPI1 BNA1 SST2 ECM3                                                     |
| <a href="#">YPR196W</a> | 6.25%  | 0.60% | 5.27E-02 | <a href="#">ECM3</a>                                                         |
| <a href="#">Abf1p</a>   | 56.25% | 0.32% | 5.32E-02 | TIP1 RTC2 ICS2 MKC7 RGD2 RPI1 BNA1 BNA5<br>SST2                              |
| <a href="#">Wtm2p</a>   | 6.25%  | 0.59% | 5.39E-02 | <a href="#">ECM3</a>                                                         |
| <a href="#">YJL206C</a> | 6.25%  | 0.58% | 5.56E-02 | <a href="#">NUR1</a>                                                         |
| <a href="#">Rpi1p</a>   | 6.25%  | 0.57% | 5.68E-02 | <a href="#">RPI1</a>                                                         |
| <a href="#">Flo8p</a>   | 25.00% | 0.41% | 5.71E-02 | ICS2 BNA6 RPI1 BNA5                                                          |
| <a href="#">Rtg3p</a>   | 18.75% | 0.44% | 5.77E-02 | BNA1 BNA5 MED11                                                              |
| <a href="#">Hap4p</a>   | 25.00% | 0.40% | 6.15E-02 | ICS2 RGD2 RPI1 BNA1                                                          |
| <a href="#">Rme1p</a>   | 12.50% | 0.48% | 6.30E-02 | MKC7 ATE1                                                                    |
| <a href="#">Plm2p</a>   | 6.25%  | 0.54% | 6.33E-02 | <a href="#">NUR1</a>                                                         |
| <a href="#">Mga1p</a>   | 18.75% | 0.43% | 6.55E-02 | RPI1 SST2 ECM3                                                               |
| <a href="#">Wtm1p</a>   | 6.25%  | 0.53% | 6.57E-02 | <a href="#">MKC7</a>                                                         |
| <a href="#">YLR278C</a> | 12.50% | 0.47% | 6.59E-02 | TIP1 ECM3                                                                    |
| <a href="#">Hsf1p</a>   | 37.50% | 0.35% | 7.06E-02 | TIP1 ICS2 HOS4 RPI1 SST2 MED11                                               |
| <a href="#">Stp1p</a>   | 18.75% | 0.42% | 7.07E-02 | RPI1 BNA5 MED11                                                              |
| <a href="#">Azf1p</a>   | 6.25%  | 0.51% | 7.13E-02 | <a href="#">MKC7</a>                                                         |
| <a href="#">Tos4p</a>   | 6.25%  | 0.50% | 7.38E-02 | <a href="#">TIP1</a>                                                         |
| <a href="#">Fzf1p</a>   | 6.25%  | 0.49% | 7.51E-02 | <a href="#">MED11</a>                                                        |

|                         |        |       |          |                                                    |
|-------------------------|--------|-------|----------|----------------------------------------------------|
| <a href="#">Hap5p</a>   | 12.50% | 0.44% | 7.57E-02 | TIP1 BNA1                                          |
| <a href="#">Pho4p</a>   | 31.25% | 0.35% | 7.74E-02 | TIP1 RTC2 HOS4 SST2 ECM3                           |
| <a href="#">Swi4p</a>   | 25.00% | 0.37% | 7.88E-02 | TIP1 BNA1 BNA5 SST2                                |
| <a href="#">Rap1p</a>   | 56.25% | 0.30% | 8.13E-02 | TIP1 RTC2 ICS2 BNA6 RPI1 BNA1 BNA5 SST2<br>ECM3    |
| <a href="#">Yox1p</a>   | 31.25% | 0.35% | 8.20E-02 | TIP1 MKC7 RGD2 RPI1 SST2                           |
| <a href="#">Cup9p</a>   | 25.00% | 0.37% | 8.36E-02 | TIP1 RPI1 MED11 ECM3                               |
| <a href="#">Cha4p</a>   | 6.25%  | 0.46% | 8.36E-02 | <a href="#">MKC7</a>                               |
| <a href="#">Phd1p</a>   | 18.75% | 0.39% | 8.37E-02 | TIP1 ICS2 RPI1                                     |
| <a href="#">Gat4p</a>   | 6.25%  | 0.46% | 8.43E-02 | <a href="#">TIP1</a>                               |
| <a href="#">Tda9p</a>   | 6.25%  | 0.45% | 8.83E-02 | <a href="#">TIP1</a>                               |
| <a href="#">Fkh1p</a>   | 50.00% | 0.30% | 9.11E-02 | TIP1 RTC2 ICS2 RPI1 BNA1 SST2 MED11 ECM3           |
| <a href="#">Rim101p</a> | 37.50% | 0.32% | 9.50E-02 | TIP1 ICS2 BNA6 RPI1 SST2 ECM3                      |
| <a href="#">Cad1p</a>   | 18.75% | 0.38% | 9.50E-02 | RTC2 ICS2 RPI1                                     |
| <a href="#">Rdr1p</a>   | 6.25%  | 0.43% | 9.58E-02 | <a href="#">MED11</a>                              |
| <a href="#">Rgt1p</a>   | 12.50% | 0.40% | 9.65E-02 | TIP1 BNA5                                          |
| <a href="#">Tbf1p</a>   | 12.50% | 0.40% | 9.97E-02 | ICS2 RPI1                                          |
| <a href="#">Sip4p</a>   | 6.25%  | 0.40% | 1.04E-01 | <a href="#">TIP1</a>                               |
| <a href="#">Aft2p</a>   | 12.50% | 0.38% | 1.08E-01 | NUR1 MED11                                         |
| <a href="#">Zap1p</a>   | 31.25% | 0.32% | 1.10E-01 | ICS2 RPI1 BNA1 BNA5 SST2                           |
| <a href="#">Rds1p</a>   | 6.25%  | 0.38% | 1.14E-01 | <a href="#">ECM3</a>                               |
| <a href="#">Swi5p</a>   | 37.50% | 0.31% | 1.17E-01 | TIP1 RTC2 ICS2 MKC7 HOS4 RPI1                      |
| <a href="#">Hal9p</a>   | 6.25%  | 0.37% | 1.23E-01 | <a href="#">MKC7</a>                               |
| <a href="#">Rds2p</a>   | 12.50% | 0.36% | 1.27E-01 | TIP1 RPI1                                          |
| <a href="#">Arr1p</a>   | 31.25% | 0.31% | 1.28E-01 | TIP1 BNA6 ATE1 HOS4 BNA1                           |
| <a href="#">Tye7p</a>   | 25.00% | 0.32% | 1.29E-01 | TIP1 RTC2 SST2 MED11                               |
| <a href="#">Oaf1p</a>   | 18.75% | 0.34% | 1.30E-01 | TIP1 ICS2 RPI1                                     |
| <a href="#">Aca1p</a>   | 6.25%  | 0.35% | 1.32E-01 | <a href="#">TIP1</a>                               |
| <a href="#">Smp1p</a>   | 6.25%  | 0.35% | 1.33E-01 | <a href="#">ICS2</a>                               |
| <a href="#">Gzf3p</a>   | 6.25%  | 0.35% | 1.35E-01 | <a href="#">RTC2</a>                               |
| <a href="#">Urc2p</a>   | 6.25%  | 0.33% | 1.45E-01 | <a href="#">BNA5</a>                               |
| <a href="#">Mss11p</a>  | 12.50% | 0.33% | 1.49E-01 | TIP1 MED11                                         |
| <a href="#">Mig3p</a>   | 31.25% | 0.30% | 1.50E-01 | TIP1 NUR1 BNA6 HOS4 MED11                          |
| <a href="#">Pip2p</a>   | 25.00% | 0.31% | 1.54E-01 | TIP1 ICS2 BNA1 MED11                               |
| <a href="#">Upc2p</a>   | 6.25%  | 0.31% | 1.58E-01 | <a href="#">ICS2</a>                               |
| <a href="#">Uga3p</a>   | 6.25%  | 0.31% | 1.59E-01 | <a href="#">MED11</a>                              |
| <a href="#">Mal33p</a>  | 12.50% | 0.31% | 1.68E-01 | MKC7 SST2                                          |
| <a href="#">Yap3p</a>   | 6.25%  | 0.30% | 1.72E-01 | <a href="#">TIP1</a>                               |
| <a href="#">Put3p</a>   | 12.50% | 0.30% | 1.79E-01 | TIP1 RTC2                                          |
| <a href="#">Reb1p</a>   | 18.75% | 0.29% | 1.85E-01 | RTC2 MKC7 HOS4                                     |
| <a href="#">Rpn4p</a>   | 31.25% | 0.28% | 1.91E-01 | TIP1 RTC2 RGD2 BNA1 SST2                           |
| <a href="#">Yap1p</a>   | 56.25% | 0.26% | 1.91E-01 | TIP1 RTC2 MKC7 RGD2 RPI1 BNA1 SST2<br>YML096W ECM3 |
| <a href="#">Yap7p</a>   | 12.50% | 0.29% | 1.99E-01 | TIP1 RPI1                                          |
| <a href="#">Dal81p</a>  | 6.25%  | 0.27% | 1.99E-01 | <a href="#">MED11</a>                              |
| <a href="#">Mbp1p</a>   | 12.50% | 0.29% | 2.01E-01 | RTC2 MKC7                                          |

|                        |        |       |          |                                    |
|------------------------|--------|-------|----------|------------------------------------|
| <a href="#">Skn7p</a>  | 18.75% | 0.28% | 2.04E-01 | ICS2 RPI1 SST2                     |
| <a href="#">Pho2p</a>  | 18.75% | 0.28% | 2.12E-01 | TIP1 MKC7 BNA1                     |
| <a href="#">Tup1p</a>  | 43.75% | 0.26% | 2.13E-01 | TIP1 ICS2 RGD2 BNA6 ATE1 RPI1 SST2 |
| <a href="#">Ino4p</a>  | 25.00% | 0.27% | 2.18E-01 | TIP1 NUR1 RPI1 BNA5                |
| <a href="#">Gis1p</a>  | 6.25%  | 0.26% | 2.19E-01 | <a href="#">TIP1</a>               |
| <a href="#">Ume6p</a>  | 25.00% | 0.27% | 2.21E-01 | ICS2 HOS4 RPI1 BNA1                |
| <a href="#">Arg80p</a> | 6.25%  | 0.25% | 2.22E-01 | <a href="#">SST2</a>               |
| <a href="#">Aro80p</a> | 6.25%  | 0.23% | 2.50E-01 | <a href="#">TIP1</a>               |
| <a href="#">Thi2p</a>  | 12.50% | 0.25% | 2.63E-01 | TIP1 MED11                         |
| <a href="#">Pdr3p</a>  | 18.75% | 0.25% | 2.65E-01 | RTC2 RPI1 YML096W                  |
| <a href="#">Adr1p</a>  | 12.50% | 0.24% | 2.82E-01 | TIP1 RPI1                          |
| <a href="#">Gal4p</a>  | 18.75% | 0.25% | 2.85E-01 | TIP1 MED11 ECM3                    |
| <a href="#">Gcr1p</a>  | 25.00% | 0.24% | 2.96E-01 | TIP1 RTC2 BNA1 BNA5                |
| <a href="#">Sut1p</a>  | 6.25%  | 0.18% | 3.53E-01 | <a href="#">TIP1</a>               |
| <a href="#">Met32p</a> | 6.25%  | 0.18% | 3.53E-01 | <a href="#">BNA1</a>               |
| <a href="#">Yrm1p</a>  | 37.50% | 0.23% | 3.60E-01 | TIP1 ICS2 RGD2 BNA5 MED11 ECM3     |
| <a href="#">Ndt80p</a> | 6.25%  | 0.17% | 3.71E-01 | <a href="#">TIP1</a>               |
| <a href="#">Hms1p</a>  | 12.50% | 0.20% | 3.90E-01 | TIP1 MED11                         |
| <a href="#">Hac1p</a>  | 6.25%  | 0.17% | 3.98E-01 | <a href="#">MED11</a>              |
| <a href="#">Pdr1p</a>  | 18.75% | 0.21% | 4.09E-01 | RTC2 ICS2 RPI1                     |
| <a href="#">Ino2p</a>  | 6.25%  | 0.15% | 4.44E-01 | <a href="#">BNA5</a>               |
| <a href="#">Haa1p</a>  | 6.25%  | 0.15% | 4.51E-01 | <a href="#">SST2</a>               |
| <a href="#">Cbf1p</a>  | 18.75% | 0.20% | 4.57E-01 | TIP1 RTC2 RPI1                     |
| <a href="#">Fkh2p</a>  | 25.00% | 0.20% | 5.00E-01 | TIP1 ICS2 RPI1 ECM3                |
| <a href="#">Hap2p</a>  | 18.75% | 0.19% | 5.06E-01 | BNA1 SST2 MED11                    |
| <a href="#">Dal82p</a> | 6.25%  | 0.12% | 5.59E-01 | <a href="#">MKC7</a>               |
| <a href="#">Yap5p</a>  | 6.25%  | 0.11% | 6.02E-01 | <a href="#">YML096W</a>            |
| <a href="#">Spt23p</a> | 18.75% | 0.16% | 6.18E-01 | TIP1 RPI1 SST2                     |
| <a href="#">Cst6p</a>  | 31.25% | 0.18% | 6.19E-01 | TIP1 RPI1 BNA1 BNA5 SST2           |
| <a href="#">Aft1p</a>  | 12.50% | 0.14% | 6.38E-01 | TIP1 HOS4                          |
| <a href="#">Met4p</a>  | 12.50% | 0.13% | 7.08E-01 | RTC2 BNA1                          |
| <a href="#">Yrr1p</a>  | 6.25%  | 0.08% | 8.12E-01 | <a href="#">ECM3</a>               |

Subnetwork 4

| Transcription Factor   | % in user set | % in Yeastract | p-value  | Target ORF/Genes                                                                      |
|------------------------|---------------|----------------|----------|---------------------------------------------------------------------------------------|
| <a href="#">Ppr1p</a>  | 18.75%        | 1.55%          | 7.47E-04 | EDC2 MTD1 YAP1                                                                        |
| <a href="#">Rdr1p</a>  | 18.75%        | 1.28%          | 1.53E-03 | MTD1 YAP1 YPL071C                                                                     |
| <a href="#">Sip4p</a>  | 18.75%        | 1.21%          | 1.84E-03 | EDC2 COX5b YAP1                                                                       |
| <a href="#">Yap7p</a>  | 31.25%        | 0.72%          | 2.83E-03 | EDC2 CIS3 URA8 MLF3 KRE1                                                              |
| <a href="#">Yap6p</a>  | 37.50%        | 0.61%          | 3.26E-03 | EDC2 YHR033W CIS3 URA8 MTD1 YAP1                                                      |
| <a href="#">Stp1p</a>  | 31.25%        | 0.69%          | 3.46E-03 | AGP2 EDC2 CIS3 YAP1 KRE1                                                              |
| <a href="#">Sfp1p</a>  | 87.50%        | 0.32%          | 3.92E-03 | AGP2 ISC1 EDC2 YHR033W PIH1 COX5b<br>CIS3 URA8 MTD1 YAP1 YNL046W KRE1<br>DSE3 YPL071C |
| <a href="#">Aft2p</a>  | 25.00%        | 0.76%          | 4.60E-03 | AGP2 EDC2 YHR033W YAP1                                                                |
| <a href="#">Cup9p</a>  | 37.50%        | 0.55%          | 6.08E-03 | AGP2 YHR033W CIS3 MLF3 KRE1<br>YPL071C                                                |
| <a href="#">Pho4p</a>  | 43.75%        | 0.50%          | 6.42E-03 | AGP2 ISC1 EDC2 YHR033W CIS3 MLF3<br>KRE1                                              |
| <a href="#">Mga2p</a>  | 37.50%        | 0.54%          | 6.74E-03 | AGP2 EDC2 MTD1 YNL046W MLF3 DSE3                                                      |
| <a href="#">Spt23p</a> | 50.00%        | 0.44%          | 8.81E-03 | EDC2 CIS3 MTD1 YAP1 PPZ1 YNL046W<br>MLF3 KRE1                                         |
| <a href="#">Opi1p</a>  | 18.75%        | 0.79%          | 8.81E-03 | URA8 MTD1 DSE3                                                                        |
| <a href="#">Stb5p</a>  | 37.50%        | 0.52%          | 8.84E-03 | CIS3 URA8 MTD1 YAP1 MLF3 KRE1                                                         |
| <a href="#">Azf1p</a>  | 12.50%        | 1.01%          | 9.03E-03 | CIS3 YAP1                                                                             |
| <a href="#">Sum1p</a>  | 25.00%        | 0.65%          | 9.49E-03 | EDC2 CIS3 MLF3 KRE1                                                                   |
| <a href="#">Gis1p</a>  | 18.75%        | 0.77%          | 9.64E-03 | YHR033W COX5b YNL046W                                                                 |
| <a href="#">Ino2p</a>  | 25.00%        | 0.61%          | 1.24E-02 | PIH1 URA8 MTD1 DSE3                                                                   |
| <a href="#">Tye7p</a>  | 37.50%        | 0.48%          | 1.25E-02 | AGP2 ISC1 CIS3 MLF3 KRE1 YPL071C                                                      |
| <a href="#">Fhl1p</a>  | 37.50%        | 0.48%          | 1.30E-02 | ISC1 EDC2 YHR033W COX5b CIS3<br>YPL071C                                               |
| <a href="#">Ace2p</a>  | 87.50%        | 0.29%          | 1.45E-02 | AGP2 ISC1 EDC2 YHR033W PIH1 COX5b<br>CIS3 URA8 MTD1 YAP1 PPZ1 YNL046W<br>DSE3 YPL071C |
| <a href="#">Hap2p</a>  | 43.75%        | 0.43%          | 1.49E-02 | EDC2 PIH1 CIS3 YNL046W KRE1 DSE3<br>YPL071C                                           |
| <a href="#">Stb4p</a>  | 6.25%         | 1.18%          | 1.51E-02 | <a href="#">YAP1</a>                                                                  |
| <a href="#">Gal80p</a> | 6.25%         | 1.16%          | 1.55E-02 | <a href="#">YAP1</a>                                                                  |
| <a href="#">Gcr1p</a>  | 43.75%        | 0.43%          | 1.61E-02 | AGP2 ISC1 EDC2 CIS3 URA8 YAP1 KRE1                                                    |
| <a href="#">Nrg1p</a>  | 25.00%        | 0.55%          | 1.79E-02 | AGP2 EDC2 YHR033W YAP1                                                                |
| <a href="#">Rsc30p</a> | 6.25%         | 0.98%          | 2.13E-02 | <a href="#">COX5b</a>                                                                 |
| <a href="#">Rgt1p</a>  | 18.75%        | 0.60%          | 2.19E-02 | YHR033W CIS3 KRE1                                                                     |
| <a href="#">Phd1p</a>  | 25.00%        | 0.52%          | 2.22E-02 | EDC2 YHR033W CIS3 KRE1                                                                |
| <a href="#">Ste12p</a> | 75.00%        | 0.31%          | 2.34E-02 | ISC1 YHR033W PIH1 CIS3 URA8 MTD1<br>YAP1 YNL046W MLF3 KRE1 DSE3<br>YPL071C            |

|                         |        |       |          |                                                               |
|-------------------------|--------|-------|----------|---------------------------------------------------------------|
| <a href="#">Pho2p</a>   | 31.25% | 0.47% | 2.39E-02 | EDC2 COX5b MTD1 YNL046W DSE3                                  |
| <a href="#">Aca1p</a>   | 12.50% | 0.70% | 2.40E-02 | CIS3 KRE1                                                     |
| <a href="#">Ndd1p</a>   | 6.25%  | 0.90% | 2.50E-02 | <a href="#">CIS3</a>                                          |
| <a href="#">Ecm22p</a>  | 18.75% | 0.56% | 2.71E-02 | EDC2 COX5b YPL071C                                            |
| <a href="#">Rpn4p</a>   | 43.75% | 0.39% | 2.73E-02 | EDC2 COX5b CIS3 MTD1 YAP1 YNL046W YPL071C                     |
| <a href="#">Urc2p</a>   | 12.50% | 0.66% | 2.79E-02 | AGP2 MTD1                                                     |
| <a href="#">Cin5p</a>   | 50.00% | 0.37% | 2.89E-02 | EDC2 YHR033W CIS3 URA8 MTD1 MLF3 KRE1 YPL071C                 |
| <a href="#">Yap1p</a>   | 68.75% | 0.32% | 2.90E-02 | AGP2 EDC2 YHR033W PIH1 COX5b CIS3 URA8 MTD1 YAP1 YNL046W DSE3 |
| <a href="#">Met32p</a>  | 18.75% | 0.55% | 3.02E-02 | YHR033W CIS3 YAP1                                             |
| <a href="#">Sok2p</a>   | 50.00% | 0.35% | 3.60E-02 | AGP2 ISC1 EDC2 YHR033W CIS3 URA8 YAP1 KRE1                    |
| <a href="#">Yap3p</a>   | 12.50% | 0.60% | 3.65E-02 | CIS3 KRE1                                                     |
| <a href="#">YPR015C</a> | 6.25%  | 0.72% | 3.73E-02 | <a href="#">PPZ1</a>                                          |
| <a href="#">Mot3p</a>   | 18.75% | 0.51% | 3.76E-02 | COX5b YNL046W MLF3                                            |
| <a href="#">Yap5p</a>   | 25.00% | 0.46% | 3.79E-02 | YHR033W CIS3 MTD1 YNL046W                                     |
| <a href="#">Nrg2p</a>   | 12.50% | 0.58% | 3.99E-02 | AGP2 YHR033W                                                  |
| <a href="#">Mth1p</a>   | 12.50% | 0.58% | 3.99E-02 | MTD1 YAP1                                                     |
| <a href="#">Oaf1p</a>   | 25.00% | 0.45% | 4.05E-02 | CIS3 MTD1 YAP1 KRE1                                           |
| <a href="#">Gal4p</a>   | 31.25% | 0.41% | 4.15E-02 | CIS3 PPZ1 MLF3 KRE1 YPL071C                                   |
| <a href="#">Cst6p</a>   | 56.25% | 0.33% | 4.32E-02 | AGP2 EDC2 YHR033W COX5b CIS3 MTD1 YAP1 PPZ1 YPL071C           |
| <a href="#">Swi5p</a>   | 43.75% | 0.36% | 4.42E-02 | AGP2 YHR033W COX5b CIS3 YNL046W KRE1 DSE3                     |
| <a href="#">Sko1p</a>   | 25.00% | 0.43% | 4.67E-02 | YHR033W CIS3 YAP1 DSE3                                        |
| <a href="#">Dot6p</a>   | 6.25%  | 0.63% | 4.83E-02 | <a href="#">YAP1</a>                                          |
| <a href="#">YPR196W</a> | 6.25%  | 0.60% | 5.27E-02 | <a href="#">MTD1</a>                                          |
| <a href="#">Put3p</a>   | 18.75% | 0.46% | 5.35E-02 | EDC2 CIS3 KRE1                                                |
| <a href="#">Wtm2p</a>   | 6.25%  | 0.59% | 5.39E-02 | <a href="#">MTD1</a>                                          |
| <a href="#">Mig3p</a>   | 37.50% | 0.36% | 5.82E-02 | AGP2 YHR033W COX5b URA8 YAP1 KRE1                             |
| <a href="#">Mcm1p</a>   | 37.50% | 0.36% | 5.86E-02 | AGP2 EDC2 CIS3 URA8 PPZ1 YPL071C                              |
| <a href="#">Hms1p</a>   | 25.00% | 0.40% | 6.06E-02 | CIS3 MLF3 KRE1 YPL071C                                        |
| <a href="#">Hap4p</a>   | 25.00% | 0.40% | 6.15E-02 | EDC2 COX5b CIS3 DSE3                                          |
| <a href="#">YGR067C</a> | 6.25%  | 0.55% | 6.21E-02 | <a href="#">EDC2</a>                                          |
| <a href="#">Sut2p</a>   | 6.25%  | 0.54% | 6.39E-02 | <a href="#">DSE3</a>                                          |
| <a href="#">YLR278C</a> | 12.50% | 0.47% | 6.59E-02 | MTD1 DSE3                                                     |
| <a href="#">Rlm1p</a>   | 18.75% | 0.42% | 6.81E-02 | YHR033W COX5b CIS3                                            |
| <a href="#">Hsf1p</a>   | 37.50% | 0.35% | 7.06E-02 | AGP2 EDC2 CIS3 MTD1 YAP1 DSE3                                 |
| <a href="#">Gat3p</a>   | 12.50% | 0.45% | 7.45E-02 | YAP1 MLF3                                                     |
| <a href="#">Aft1p</a>   | 31.25% | 0.36% | 7.68E-02 | AGP2 YHR033W COX5b CIS3 YPL071C                               |
| <a href="#">Xbp1p</a>   | 31.25% | 0.36% | 7.68E-02 | AGP2 EDC2 COX5b CIS3 MLF3                                     |
| <a href="#">Msn4p</a>   | 50.00% | 0.31% | 7.89E-02 | AGP2 YHR033W PIH1 COX5b MTD1 YAP1 PPZ1 YPL071C                |

|                        |        |       |          |                                                       |
|------------------------|--------|-------|----------|-------------------------------------------------------|
| <a href="#">Gcn4p</a>  | 56.25% | 0.30% | 8.01E-02 | EDC2 PIH1 CIS3 URA8 MTD1 YAP1 PPZ1<br>KRE1 DSE3       |
| <a href="#">Rap1p</a>  | 56.25% | 0.30% | 8.13E-02 | ISC1 EDC2 YHR033W CIS3 URA8 MTD1<br>YAP1 YNL046W KRE1 |
| <a href="#">Bas1p</a>  | 56.25% | 0.30% | 8.15E-02 | EDC2 YHR033W CIS3 URA8 MTD1 YAP1<br>PPZ1 MLF3 DSE3    |
| <a href="#">Gat4p</a>  | 6.25%  | 0.46% | 8.43E-02 | <a href="#">MLF3</a>                                  |
| <a href="#">Tda9p</a>  | 6.25%  | 0.45% | 8.83E-02 | <a href="#">YAP1</a>                                  |
| <a href="#">Ino4p</a>  | 31.25% | 0.34% | 9.04E-02 | YHR033W PIH1 URA8 DSE3 YPL071C                        |
| <a href="#">Ert1p</a>  | 6.25%  | 0.44% | 9.17E-02 | <a href="#">DSE3</a>                                  |
| <a href="#">Thi2p</a>  | 18.75% | 0.38% | 9.53E-02 | CIS3 KRE1 YPL071C                                     |
| <a href="#">Tbf1p</a>  | 12.50% | 0.40% | 9.97E-02 | MTD1 YAP1                                             |
| <a href="#">Cbf1p</a>  | 31.25% | 0.33% | 1.06E-01 | YHR033W CIS3 MTD1 YAP1 DSE3                           |
| <a href="#">Zap1p</a>  | 31.25% | 0.32% | 1.10E-01 | YHR033W COX5b URA8 MTD1 MLF3                          |
| <a href="#">Met4p</a>  | 31.25% | 0.32% | 1.13E-01 | ISC1 EDC2 YHR033W CIS3 YAP1                           |
| <a href="#">Gln3p</a>  | 25.00% | 0.34% | 1.13E-01 | YHR033W URA8 MTD1 KRE1                                |
| <a href="#">Rds1p</a>  | 6.25%  | 0.38% | 1.14E-01 | <a href="#">COX5b</a>                                 |
| <a href="#">Kar4p</a>  | 18.75% | 0.35% | 1.18E-01 | ISC1 CIS3 KRE1                                        |
| <a href="#">Sut1p</a>  | 12.50% | 0.36% | 1.21E-01 | COX5b KRE1                                            |
| <a href="#">Rds2p</a>  | 12.50% | 0.36% | 1.27E-01 | CIS3 KRE1                                             |
| <a href="#">Abf1p</a>  | 50.00% | 0.28% | 1.32E-01 | AGP2 ISC1 EDC2 YHR033W PIH1 CIS3<br>YAP1 KRE1         |
| <a href="#">Smp1p</a>  | 6.25%  | 0.35% | 1.33E-01 | <a href="#">CIS3</a>                                  |
| <a href="#">Yrr1p</a>  | 25.00% | 0.31% | 1.46E-01 | ISC1 EDC2 CIS3 YAP1                                   |
| <a href="#">Yhp1p</a>  | 25.00% | 0.31% | 1.47E-01 | COX5b CIS3 MLF3 DSE3                                  |
| <a href="#">Hac1p</a>  | 12.50% | 0.33% | 1.48E-01 | COX5b YPL071C                                         |
| <a href="#">Hap3p</a>  | 6.25%  | 0.33% | 1.48E-01 | <a href="#">YAP1</a>                                  |
| <a href="#">Mig2p</a>  | 6.25%  | 0.33% | 1.49E-01 | <a href="#">YHR033W</a>                               |
| <a href="#">Pip2p</a>  | 25.00% | 0.31% | 1.54E-01 | CIS3 MLF3 KRE1 YPL071C                                |
| <a href="#">Uga3p</a>  | 6.25%  | 0.31% | 1.59E-01 | <a href="#">EDC2</a>                                  |
| <a href="#">Crz1p</a>  | 12.50% | 0.31% | 1.68E-01 | EDC2 YPL071C                                          |
| <a href="#">Mal33p</a> | 12.50% | 0.31% | 1.68E-01 | ISC1 MTD1                                             |
| <a href="#">Stp2p</a>  | 12.50% | 0.31% | 1.70E-01 | AGP2 YAP1                                             |
| <a href="#">Ixr1p</a>  | 31.25% | 0.29% | 1.71E-01 | AGP2 ISC1 COX5b URA8 DSE3                             |
| <a href="#">Msn2p</a>  | 56.25% | 0.26% | 1.79E-01 | AGP2 YHR033W PIH1 COX5b CIS3 URA8<br>MTD1 YAP1 PPZ1   |
| <a href="#">Hap1p</a>  | 6.25%  | 0.29% | 1.82E-01 | <a href="#">YAP1</a>                                  |
| <a href="#">Arg81p</a> | 6.25%  | 0.29% | 1.84E-01 | <a href="#">URA8</a>                                  |
| <a href="#">Reb1p</a>  | 18.75% | 0.29% | 1.85E-01 | CIS3 YAP1 KRE1                                        |
| <a href="#">Rtg3p</a>  | 12.50% | 0.30% | 1.88E-01 | EDC2 YPL071C                                          |
| <a href="#">Dal81p</a> | 6.25%  | 0.27% | 1.99E-01 | <a href="#">EDC2</a>                                  |
| <a href="#">Skn7p</a>  | 18.75% | 0.28% | 2.04E-01 | CIS3 YAP1 KRE1                                        |
| <a href="#">Mga1p</a>  | 12.50% | 0.28% | 2.05E-01 | YHR033W YPL071C                                       |
| <a href="#">Rfx1p</a>  | 12.50% | 0.28% | 2.05E-01 | KRE1 DSE3                                             |
| <a href="#">Ume6p</a>  | 25.00% | 0.27% | 2.21E-01 | AGP2 COX5b CIS3 MLF3                                  |
| <a href="#">Met31p</a> | 6.25%  | 0.25% | 2.32E-01 | <a href="#">PIH1</a>                                  |
| <a href="#">Tos8p</a>  | 6.25%  | 0.25% | 2.32E-01 | <a href="#">MLF3</a>                                  |

|                         |        |       |          |                                           |
|-------------------------|--------|-------|----------|-------------------------------------------|
| <a href="#">Rme1p</a>   | 6.25%  | 0.24% | 2.40E-01 | <a href="#">YHR033W</a>                   |
| <a href="#">Aro80p</a>  | 6.25%  | 0.23% | 2.50E-01 | <a href="#">YAP1</a>                      |
| <a href="#">Rsf2p</a>   | 6.25%  | 0.23% | 2.54E-01 | <a href="#">ISC1</a>                      |
| <a href="#">Hcm1p</a>   | 6.25%  | 0.23% | 2.55E-01 | <a href="#">COX5b</a>                     |
| <a href="#">Cad1p</a>   | 12.50% | 0.25% | 2.63E-01 | PIH1 MTD1                                 |
| <a href="#">Mig1p</a>   | 6.25%  | 0.22% | 2.70E-01 | <a href="#">EDC2</a>                      |
| <a href="#">Arr1p</a>   | 25.00% | 0.25% | 2.80E-01 | AGP2 COX5b CIS3 MTD1                      |
| <a href="#">Adr1p</a>   | 12.50% | 0.24% | 2.82E-01 | AGP2 MTD1                                 |
| <a href="#">lfh1p</a>   | 6.25%  | 0.19% | 3.27E-01 | <a href="#">MLF3</a>                      |
| <a href="#">Gcr2p</a>   | 18.75% | 0.23% | 3.39E-01 | COX5b URA8 MTD1                           |
| <a href="#">Yrm1p</a>   | 37.50% | 0.23% | 3.60E-01 | ISC1 COX5b MTD1 PPZ1 DSE3 YPL071C         |
| <a href="#">Cup2p</a>   | 6.25%  | 0.17% | 3.77E-01 | <a href="#">YHR033W</a>                   |
| <a href="#">Flo8p</a>   | 12.50% | 0.20% | 3.79E-01 | EDC2 YAP1                                 |
| <a href="#">Tup1p</a>   | 37.50% | 0.23% | 3.85E-01 | YHR033W CIS3 URA8 MTD1 MLF3 KRE1          |
| <a href="#">Mss11p</a>  | 6.25%  | 0.17% | 4.00E-01 | <a href="#">YPL071C</a>                   |
| <a href="#">Yox1p</a>   | 18.75% | 0.21% | 4.03E-01 | COX5b CIS3 DSE3                           |
| <a href="#">Ash1p</a>   | 43.75% | 0.22% | 4.27E-01 | YHR033W COX5b CIS3 URA8 MTD1<br>PPZ1 DSE3 |
| <a href="#">Swi4p</a>   | 12.50% | 0.19% | 4.39E-01 | EDC2 CIS3                                 |
| <a href="#">Leu3p</a>   | 6.25%  | 0.15% | 4.48E-01 | <a href="#">YHR033W</a>                   |
| <a href="#">Haa1p</a>   | 6.25%  | 0.15% | 4.51E-01 | <a href="#">YPL071C</a>                   |
| <a href="#">Mbp1p</a>   | 6.25%  | 0.14% | 4.74E-01 | <a href="#">YNL046W</a>                   |
| <a href="#">Rph1p</a>   | 6.25%  | 0.14% | 4.84E-01 | <a href="#">AGP2</a>                      |
| <a href="#">Fkh2p</a>   | 25.00% | 0.20% | 5.00E-01 | EDC2 YHR033W CIS3 YNL046W                 |
| <a href="#">Pdr3p</a>   | 12.50% | 0.17% | 5.07E-01 | EDC2 YAP1                                 |
| <a href="#">Rox1p</a>   | 6.25%  | 0.11% | 6.20E-01 | <a href="#">COX5b</a>                     |
| <a href="#">Tec1p</a>   | 43.75% | 0.18% | 7.04E-01 | YHR033W PIH1 CIS3 YAP1 MLF3 KRE1<br>DSE3  |
| <a href="#">Fkh1p</a>   | 25.00% | 0.15% | 7.63E-01 | YHR033W CIS3 MTD1 KRE1                    |
| <a href="#">Rim101p</a> | 12.50% | 0.11% | 8.27E-01 | YNL046W DSE3                              |
| <a href="#">Pdr1p</a>   | 6.25%  | 0.07% | 8.63E-01 | <a href="#">EDC2</a>                      |



Subnetwork 5

| Transcription Factor    | % in user set | % in Yeasttract | p-value  | Target ORF/Genes                                         |
|-------------------------|---------------|-----------------|----------|----------------------------------------------------------|
| <a href="#">Hot1p</a>   | 30.00%        | 2.94%           | 7.75E-06 | TPS1 SPI1 XKS1                                           |
| <a href="#">Rlm1p</a>   | 60.00%        | 0.84%           | 8.88E-06 | YBR071W TPS1 PHM8 SPI1 GRE3 NNR1                         |
| <a href="#">Mig1p</a>   | 50.00%        | 1.10%           | 1.07E-05 | YBR071W TPS1 SPI1 GRE3 NNR1                              |
| <a href="#">Msn1p</a>   | 40.00%        | 1.39%           | 2.17E-05 | YBR071W TPS1 PHM8 GRE3                                   |
| <a href="#">Gcr2p</a>   | 70.00%        | 0.53%           | 4.11E-05 | YBR071W TPS1 YBR137W SPI1 GRE3<br>YMD8 NNR1              |
| <a href="#">Xbp1p</a>   | 70.00%        | 0.50%           | 6.88E-05 | YBR071W YBR137W SPI1 XKS1 GRE3<br>YMD8 NNR1              |
| <a href="#">Bas1p</a>   | 90.00%        | 0.30%           | 1.73E-04 | YBR071W TPS1 YBR137W YBR225W<br>PHM8 SPI1 GRE3 YMD8 NNR1 |
| <a href="#">Spt23p</a>  | 70.00%        | 0.38%           | 4.95E-04 | YBR071W TPS1 YBR137W PHM8 SPI1<br>GRE3 NNR1              |
| <a href="#">Sko1p</a>   | 50.00%        | 0.54%           | 6.21E-04 | TPS1 PHM8 SPI1 GRE3 NNR1                                 |
| <a href="#">Aft1p</a>   | 60.00%        | 0.43%           | 7.80E-04 | TPS1 YBR225W PHM8 SPI1 GRE3 NNR1                         |
| <a href="#">Hap4p</a>   | 50.00%        | 0.50%           | 9.38E-04 | YBR071W PHM8 SPI1 XKS1 NNR1                              |
| <a href="#">Stb3p</a>   | 10.00%        | 2.86%           | 1.03E-03 | <a href="#">TPS1</a>                                     |
| <a href="#">Swi4p</a>   | 50.00%        | 0.47%           | 1.37E-03 | YBR071W PHM8 SPI1 GRE3 NNR1                              |
| <a href="#">Zap1p</a>   | 60.00%        | 0.39%           | 1.39E-03 | TPS1 PHM8 SPI1 XKS1 GRE3 NNR1                            |
| <a href="#">Wtm2p</a>   | 20.00%        | 1.18%           | 1.39E-03 | TPS1 SPI1                                                |
| <a href="#">Rgm1p</a>   | 30.00%        | 0.76%           | 1.50E-03 | TPS1 SPI1 NNR1                                           |
| <a href="#">Mga2p</a>   | 50.00%        | 0.45%           | 1.66E-03 | TPS1 YBR137W SPI1 GRE3 NNR1                              |
| <a href="#">YGR067C</a> | 20.00%        | 1.09%           | 1.75E-03 | YBR071W TPS1                                             |
| <a href="#">Oaf3p</a>   | 30.00%        | 0.71%           | 1.87E-03 | YBR071W TPS1 YBR137W                                     |
| <a href="#">Stb5p</a>   | 50.00%        | 0.43%           | 2.15E-03 | TPS1 YBR137W PHM8 XKS1 NNR1                              |
| <a href="#">Pdr3p</a>   | 50.00%        | 0.42%           | 2.30E-03 | TPS1 PHM8 SPI1 GRE3 NNR1                                 |
| <a href="#">Sok2p</a>   | 70.00%        | 0.31%           | 2.32E-03 | TPS1 YBR225W PHM8 SPI1 XKS1 GRE3<br>NNR1                 |
| <a href="#">Mcm1p</a>   | 60.00%        | 0.36%           | 2.33E-03 | YBR071W TPS1 YBR137W PHM8 SPI1<br>YMD8                   |
| <a href="#">Hsf1p</a>   | 60.00%        | 0.35%           | 2.98E-03 | YBR071W TPS1 PHM8 SPI1 XKS1 GRE3                         |
| <a href="#">Fhl1p</a>   | 50.00%        | 0.40%           | 3.13E-03 | YBR071W TPS1 YBR137W PHM8 SPI1                           |
| <a href="#">Ert1p</a>   | 20.00%        | 0.87%           | 3.32E-03 | YBR071W TPS1                                             |
| <a href="#">Rpn4p</a>   | 60.00%        | 0.34%           | 3.53E-03 | TPS1 YBR137W SPI1 XKS1 GRE3 NNR1                         |
| <a href="#">Aft2p</a>   | 30.00%        | 0.57%           | 4.20E-03 | TPS1 SPI1 GRE3                                           |
| <a href="#">Ash1p</a>   | 80.00%        | 0.25%           | 4.23E-03 | YBR071W TPS1 YBR137W YBR225W<br>PHM8 SPI1 GRE3 NNR1      |
| <a href="#">Sef1p</a>   | 20.00%        | 0.79%           | 4.35E-03 | YBR137W YMD8                                             |
| <a href="#">Msn4p</a>   | 70.00%        | 0.27%           | 5.86E-03 | YBR071W TPS1 PHM8 SPI1 XKS1 GRE3<br>NNR1                 |
| <a href="#">Stb4p</a>   | 10.00%        | 1.18%           | 5.94E-03 | <a href="#">YBR225W</a>                                  |
| <a href="#">War1p</a>   | 10.00%        | 1.14%           | 6.35E-03 | <a href="#">TPS1</a>                                     |
| <a href="#">Yox1p</a>   | 50.00%        | 0.35%           | 6.39E-03 | YBR071W TPS1 SPI1 GRE3 NNR1                              |
| <a href="#">Gzf3p</a>   | 20.00%        | 0.69%           | 6.39E-03 | PHM8 SPI1                                                |

|                         |        |       |          |                                                          |
|-------------------------|--------|-------|----------|----------------------------------------------------------|
| <a href="#">Pdr1p</a>   | 50.00% | 0.35% | 6.65E-03 | TPS1 PHM8 SPI1 GRE3 NNR1                                 |
| <a href="#">Sfp1p</a>   | 90.00% | 0.21% | 6.88E-03 | YBR071W TPS1 YBR137W YBR225W<br>PHM8 SPI1 XKS1 GRE3 NNR1 |
| <a href="#">Fkh1p</a>   | 70.00% | 0.27% | 6.99E-03 | YBR071W TPS1 YBR137W PHM8 XKS1<br>GRE3 YMD8              |
| <a href="#">Urc2p</a>   | 20.00% | 0.66% | 7.22E-03 | YBR137W PHM8                                             |
| <a href="#">Yap1p</a>   | 80.00% | 0.23% | 8.26E-03 | YBR071W TPS1 YBR137W PHM8 SPI1<br>XKS1 GRE3 NNR1         |
| <a href="#">Crz1p</a>   | 30.00% | 0.47% | 8.64E-03 | YBR071W TPS1 SPI1                                        |
| <a href="#">Cst6p</a>   | 70.00% | 0.26% | 9.05E-03 | TPS1 PHM8 SPI1 XKS1 GRE3 YMD8<br>NNR1                    |
| <a href="#">Skn7p</a>   | 40.00% | 0.38% | 9.36E-03 | YBR071W TPS1 SPI1 NNR1                                   |
| <a href="#">Put3p</a>   | 30.00% | 0.46% | 9.63E-03 | SPI1 GRE3 YMD8                                           |
| <a href="#">Met4p</a>   | 50.00% | 0.32% | 9.68E-03 | YBR071W PHM8 SPI1 GRE3 NNR1                              |
| <a href="#">Haa1p</a>   | 30.00% | 0.45% | 1.02E-02 | PHM8 SPI1 NNR1                                           |
| <a href="#">Mga1p</a>   | 30.00% | 0.43% | 1.22E-02 | YBR137W SPI1 GRE3                                        |
| <a href="#">Rph1p</a>   | 30.00% | 0.42% | 1.26E-02 | TPS1 XKS1 NNR1                                           |
| <a href="#">Gis1p</a>   | 20.00% | 0.51% | 1.48E-02 | PHM8 SPI1                                                |
| <a href="#">Arg8Op</a>  | 20.00% | 0.51% | 1.52E-02 | SPI1 NNR1                                                |
| <a href="#">Met31p</a>  | 20.00% | 0.49% | 1.65E-02 | SPI1 GRE3                                                |
| <a href="#">Gcn4p</a>   | 70.00% | 0.23% | 1.71E-02 | YBR071W TPS1 YBR225W PHM8 SPI1<br>GRE3 NNR1              |
| <a href="#">Sfl1p</a>   | 10.00% | 0.68% | 1.73E-02 | <a href="#">SPI1</a>                                     |
| <a href="#">Rme1p</a>   | 20.00% | 0.48% | 1.75E-02 | SPI1 NNR1                                                |
| <a href="#">Ace2p</a>   | 90.00% | 0.19% | 1.81E-02 | YBR071W YBR137W YBR225W PHM8<br>SPI1 XKS1 GRE3 YMD8 NNR1 |
| <a href="#">Dot6p</a>   | 10.00% | 0.63% | 1.98E-02 | <a href="#">YBR071W</a>                                  |
| <a href="#">Adr1p</a>   | 30.00% | 0.36% | 2.13E-02 | TPS1 PHM8 SPI1                                           |
| <a href="#">Yhp1p</a>   | 40.00% | 0.31% | 2.15E-02 | YBR071W TPS1 GRE3 NNR1                                   |
| <a href="#">YPR196W</a> | 10.00% | 0.60% | 2.17E-02 | <a href="#">SPI1</a>                                     |
| <a href="#">Rpi1p</a>   | 10.00% | 0.57% | 2.34E-02 | <a href="#">SPI1</a>                                     |
| <a href="#">Stp4p</a>   | 10.00% | 0.57% | 2.39E-02 | <a href="#">SPI1</a>                                     |
| <a href="#">Yap5p</a>   | 30.00% | 0.34% | 2.58E-02 | XKS1 YMD8 NNR1                                           |
| <a href="#">Wtm1p</a>   | 10.00% | 0.53% | 2.73E-02 | <a href="#">TPS1</a>                                     |
| <a href="#">Azf1p</a>   | 10.00% | 0.51% | 2.98E-02 | <a href="#">NNR1</a>                                     |
| <a href="#">Swi5p</a>   | 50.00% | 0.26% | 3.00E-02 | YBR071W PHM8 SPI1 XKS1 NNR1                              |
| <a href="#">Dal8Op</a>  | 10.00% | 0.50% | 3.06E-02 | <a href="#">YBR225W</a>                                  |
| <a href="#">Gat4p</a>   | 10.00% | 0.46% | 3.56E-02 | <a href="#">SPI1</a>                                     |
| <a href="#">Sut1p</a>   | 20.00% | 0.36% | 3.63E-02 | SPI1 GRE3                                                |
| <a href="#">Flo8p</a>   | 30.00% | 0.31% | 3.72E-02 | TPS1 SPI1 GRE3                                           |
| <a href="#">Cat8p</a>   | 10.00% | 0.44% | 3.90E-02 | <a href="#">SPI1</a>                                     |
| <a href="#">Met28p</a>  | 10.00% | 0.43% | 3.93E-02 | <a href="#">YBR071W</a>                                  |
| <a href="#">Cup2p</a>   | 20.00% | 0.35% | 4.15E-02 | SPI1 NNR1                                                |
| <a href="#">Cbf1p</a>   | 40.00% | 0.26% | 4.27E-02 | TPS1 YBR225W SPI1 GRE3                                   |
| <a href="#">Sum1p</a>   | 20.00% | 0.32% | 4.94E-02 | YBR071W TPS1                                             |
| <a href="#">Rds1p</a>   | 10.00% | 0.38% | 4.94E-02 | <a href="#">SPI1</a>                                     |
| <a href="#">Abf1p</a>   | 60.00% | 0.21% | 5.09E-02 | YBR225W PHM8 SPI1 XKS1 GRE3 YMD8                         |

|                         |        |       |          |                                        |
|-------------------------|--------|-------|----------|----------------------------------------|
| <a href="#">Cin5p</a>   | 50.00% | 0.23% | 5.16E-02 | YBR071W TPS1 YBR225W SPI1 NNR1         |
| <a href="#">Hap2p</a>   | 40.00% | 0.25% | 5.33E-02 | YBR137W SPI1 YMD8 NNR1                 |
| <a href="#">Mal33p</a>  | 20.00% | 0.31% | 5.35E-02 | YBR071W YBR137W                        |
| <a href="#">Ino2p</a>   | 20.00% | 0.30% | 5.80E-02 | YBR071W SPI1                           |
| <a href="#">Smp1p</a>   | 10.00% | 0.35% | 5.83E-02 | <a href="#">YBR071W</a>                |
| <a href="#">Mbp1p</a>   | 20.00% | 0.29% | 6.64E-02 | YBR071W SPI1                           |
| <a href="#">Rfx1p</a>   | 20.00% | 0.28% | 6.78E-02 | SPI1 NNR1                              |
| <a href="#">Upc2p</a>   | 10.00% | 0.31% | 7.04E-02 | <a href="#">SPI1</a>                   |
| <a href="#">Stp1p</a>   | 20.00% | 0.28% | 7.22E-02 | YBR071W TPS1                           |
| <a href="#">Nrg2p</a>   | 10.00% | 0.29% | 8.20E-02 | <a href="#">NNR1</a>                   |
| <a href="#">Hap1p</a>   | 10.00% | 0.29% | 8.24E-02 | <a href="#">GRE3</a>                   |
| <a href="#">Arg81p</a>  | 10.00% | 0.29% | 8.33E-02 | <a href="#">YBR225W</a>                |
| <a href="#">Dal81p</a>  | 10.00% | 0.27% | 9.12E-02 | <a href="#">YBR071W</a>                |
| <a href="#">Opi1p</a>   | 10.00% | 0.26% | 9.68E-02 | <a href="#">SPI1</a>                   |
| <a href="#">Tos8p</a>   | 10.00% | 0.25% | 1.08E-01 | <a href="#">GRE3</a>                   |
| <a href="#">YLR278C</a> | 10.00% | 0.24% | 1.16E-01 | <a href="#">SPI1</a>                   |
| <a href="#">Pho4p</a>   | 30.00% | 0.21% | 1.16E-01 | YBR071W PHM8 SPI1                      |
| <a href="#">Oaf1p</a>   | 20.00% | 0.22% | 1.19E-01 | YBR071W TPS1                           |
| <a href="#">Rox1p</a>   | 20.00% | 0.22% | 1.23E-01 | SPI1 NNR1                              |
| <a href="#">Gat3p</a>   | 10.00% | 0.22% | 1.26E-01 | <a href="#">XKS1</a>                   |
| <a href="#">Hap5p</a>   | 10.00% | 0.22% | 1.28E-01 | <a href="#">YBR137W</a>                |
| <a href="#">Mac1p</a>   | 10.00% | 0.22% | 1.35E-01 | <a href="#">SPI1</a>                   |
| <a href="#">Msn2p</a>   | 60.00% | 0.18% | 1.39E-01 | TPS1 PHM8 SPI1 XKS1 GRE3 NNR1          |
| <a href="#">Yap6p</a>   | 20.00% | 0.20% | 1.47E-01 | XKS1 NNR1                              |
| <a href="#">Rgt1p</a>   | 10.00% | 0.20% | 1.51E-01 | <a href="#">PHM8</a>                   |
| <a href="#">Tbf1p</a>   | 10.00% | 0.20% | 1.55E-01 | <a href="#">PHM8</a>                   |
| <a href="#">Reb1p</a>   | 20.00% | 0.20% | 1.61E-01 | SPI1 NNR1                              |
| <a href="#">Arr1p</a>   | 30.00% | 0.19% | 1.68E-01 | TPS1 PHM8 XKS1                         |
| <a href="#">Ecm22p</a>  | 10.00% | 0.19% | 1.68E-01 | <a href="#">YMD8</a>                   |
| <a href="#">Met32p</a>  | 10.00% | 0.18% | 1.77E-01 | <a href="#">YBR225W</a>                |
| <a href="#">Gcr1p</a>   | 30.00% | 0.18% | 1.78E-01 | PHM8 SPI1 YMD8                         |
| <a href="#">Pho2p</a>   | 20.00% | 0.19% | 1.82E-01 | YBR137W SPI1                           |
| <a href="#">Rds2p</a>   | 10.00% | 0.18% | 1.83E-01 | <a href="#">SPI1</a>                   |
| <a href="#">Ndt80p</a>  | 10.00% | 0.17% | 1.89E-01 | <a href="#">YMD8</a>                   |
| <a href="#">Mot3p</a>   | 10.00% | 0.17% | 1.97E-01 | <a href="#">PHM8</a>                   |
| <a href="#">Hac1p</a>   | 10.00% | 0.17% | 2.05E-01 | <a href="#">YBR137W</a>                |
| <a href="#">Ixr1p</a>   | 30.00% | 0.17% | 2.08E-01 | PHM8 SPI1 XKS1                         |
| <a href="#">Stp2p</a>   | 10.00% | 0.16% | 2.26E-01 | <a href="#">SPI1</a>                   |
| <a href="#">Tec1p</a>   | 60.00% | 0.16% | 2.36E-01 | YBR071W YBR225W PHM8 SPI1 XKS1<br>GRE3 |
| <a href="#">Rtg3p</a>   | 10.00% | 0.15% | 2.43E-01 | <a href="#">GRE3</a>                   |
| <a href="#">Yap7p</a>   | 10.00% | 0.14% | 2.53E-01 | <a href="#">TPS1</a>                   |
| <a href="#">Nrg1p</a>   | 10.00% | 0.14% | 2.70E-01 | <a href="#">NNR1</a>                   |
| <a href="#">Pip2p</a>   | 20.00% | 0.15% | 2.72E-01 | TPS1 YBR137W                           |
| <a href="#">Yrm1p</a>   | 40.00% | 0.15% | 2.83E-01 | YBR137W SPI1 YMD8 NNR1                 |
| <a href="#">Phd1p</a>   | 10.00% | 0.13% | 2.92E-01 | <a href="#">SPI1</a>                   |
| <a href="#">Dal82p</a>  | 10.00% | 0.12% | 3.18E-01 | <a href="#">YBR071W</a>                |

|                         |        |       |          |                                |
|-------------------------|--------|-------|----------|--------------------------------|
| <a href="#">Ino4p</a>   | 20.00% | 0.14% | 3.38E-01 | SPI1 GRE3                      |
| <a href="#">Hms1p</a>   | 10.00% | 0.10% | 4.16E-01 | <a href="#">TPS1</a>           |
| <a href="#">Mig3p</a>   | 20.00% | 0.12% | 4.26E-01 | SPI1 XKS1                      |
| <a href="#">Ste12p</a>  | 50.00% | 0.13% | 4.79E-01 | YBR071W YBR225W PHM8 SPI1 NNR1 |
| <a href="#">Rim101p</a> | 20.00% | 0.11% | 5.04E-01 | SPI1 GRE3                      |
| <a href="#">Gln3p</a>   | 10.00% | 0.08% | 5.15E-01 | <a href="#">YBR137W</a>        |
| <a href="#">Gal4p</a>   | 10.00% | 0.08% | 5.29E-01 | <a href="#">TPS1</a>           |
| <a href="#">Tye7p</a>   | 10.00% | 0.08% | 5.39E-01 | <a href="#">TPS1</a>           |
| <a href="#">Tup1p</a>   | 30.00% | 0.11% | 5.49E-01 | YBR071W SPI1 YMD8              |
| <a href="#">Yrr1p</a>   | 10.00% | 0.08% | 5.61E-01 | <a href="#">PHM8</a>           |
| <a href="#">Ume6p</a>   | 10.00% | 0.07% | 6.43E-01 | <a href="#">YBR071W</a>        |
| <a href="#">Rap1p</a>   | 30.00% | 0.10% | 6.69E-01 | YBR071W TPS1 YMD8              |

Subnetwork 6

| Transcription Factor    | % in user set | % in Yeasttract | p-value  | Target ORF/Genes                    |
|-------------------------|---------------|-----------------|----------|-------------------------------------|
| <a href="#">Rpn4p</a>   | 66.67%        | 0.34%           | 1.35E-03 | RPN6 CDC53 RPN5 SPT16 RPN1 RPT5     |
| <a href="#">Tos4p</a>   | 22.22%        | 0.99%           | 1.66E-03 | SPT16 CCT2                          |
| <a href="#">Mot2p</a>   | 11.11%        | 0.81%           | 9.96E-03 | <a href="#">SPT16</a>               |
| <a href="#">Oaf1p</a>   | 33.33%        | 0.34%           | 1.82E-02 | CDC53 SPT16 RPT5                    |
| <a href="#">Abf1p</a>   | 66.67%        | 0.21%           | 2.31E-02 | RPN5 SPT16 RPN1 SMF2 CCT2 RPT5      |
| <a href="#">Reb1p</a>   | 33.33%        | 0.29%           | 2.85E-02 | RPN6 CDC53 RPT5                     |
| <a href="#">Mss11p</a>  | 22.22%        | 0.33%           | 3.48E-02 | SEN1 RPT5                           |
| <a href="#">Sip4p</a>   | 11.11%        | 0.40%           | 3.66E-02 | <a href="#">SEN1</a>                |
| <a href="#">Hap3p</a>   | 11.11%        | 0.33%           | 5.41E-02 | <a href="#">SMF2</a>                |
| <a href="#">Stp1p</a>   | 22.22%        | 0.28%           | 5.45E-02 | RPN5 SEN1                           |
| <a href="#">Nrg2p</a>   | 11.11%        | 0.29%           | 6.77E-02 | <a href="#">SEN1</a>                |
| <a href="#">Dal82p</a>  | 22.22%        | 0.25%           | 7.33E-02 | SPT16 SEN1                          |
| <a href="#">Dal81p</a>  | 11.11%        | 0.27%           | 7.55E-02 | <a href="#">CDC53</a>               |
| <a href="#">Sfp1p</a>   | 77.78%        | 0.16%           | 7.71E-02 | RPN6 RPN5 SPT16 SMF2 CCT2 SEN1 RPT5 |
| <a href="#">Gis1p</a>   | 11.11%        | 0.26%           | 8.39E-02 | <a href="#">CDC53</a>               |
| <a href="#">Pdr1p</a>   | 33.33%        | 0.21%           | 8.80E-02 | CDC53 RPN5 SEN1                     |
| <a href="#">Met31p</a>  | 11.11%        | 0.25%           | 9.00E-02 | <a href="#">SMF2</a>                |
| <a href="#">Rme1p</a>   | 11.11%        | 0.24%           | 9.35E-02 | <a href="#">CDC53</a>               |
| <a href="#">Oaf3p</a>   | 11.11%        | 0.24%           | 9.46E-02 | <a href="#">SMF2</a>                |
| <a href="#">Cbf1p</a>   | 33.33%        | 0.20%           | 1.05E-01 | RPN6 SPT16 CCT2                     |
| <a href="#">Hap5p</a>   | 11.11%        | 0.22%           | 1.07E-01 | <a href="#">SMF2</a>                |
| <a href="#">Mac1p</a>   | 11.11%        | 0.22%           | 1.13E-01 | <a href="#">SMF2</a>                |
| <a href="#">Mcm1p</a>   | 33.33%        | 0.18%           | 1.38E-01 | RPN5 SMF2 CCT2                      |
| <a href="#">Swi4p</a>   | 22.22%        | 0.19%           | 1.41E-01 | SMF2 CCT2                           |
| <a href="#">Ecm22p</a>  | 11.11%        | 0.19%           | 1.41E-01 | <a href="#">RPT5</a>                |
| <a href="#">Met32p</a>  | 11.11%        | 0.18%           | 1.49E-01 | <a href="#">SEN1</a>                |
| <a href="#">Rim101p</a> | 33.33%        | 0.16%           | 1.85E-01 | RPN5 SPT16 SEN1                     |
| <a href="#">Mal33p</a>  | 11.11%        | 0.16%           | 1.90E-01 | <a href="#">SEN1</a>                |
| <a href="#">Stp2p</a>   | 11.11%        | 0.16%           | 1.92E-01 | <a href="#">CDC53</a>               |
| <a href="#">Ino2p</a>   | 11.11%        | 0.15%           | 2.00E-01 | <a href="#">RPN6</a>                |
| <a href="#">Tup1p</a>   | 44.44%        | 0.15%           | 2.13E-01 | SPT16 RPN1 SMF2 CCT2                |
| <a href="#">Mbp1p</a>   | 11.11%        | 0.14%           | 2.18E-01 | <a href="#">SEN1</a>                |
| <a href="#">Pip2p</a>   | 22.22%        | 0.15%           | 2.18E-01 | SPT16 RPN1                          |
| <a href="#">Rph1p</a>   | 11.11%        | 0.14%           | 2.24E-01 | <a href="#">CCT2</a>                |
| <a href="#">Nrg1p</a>   | 11.11%        | 0.14%           | 2.30E-01 | <a href="#">SEN1</a>                |
| <a href="#">Cst6p</a>   | 44.44%        | 0.15%           | 2.32E-01 | RPN6 RPN1 CCT2 SEN1                 |
| <a href="#">Pho4p</a>   | 22.22%        | 0.14%           | 2.55E-01 | RPN1 SMF2                           |
| <a href="#">Yox1p</a>   | 22.22%        | 0.14%           | 2.63E-01 | CDC53 SPT16                         |
| <a href="#">Adr1p</a>   | 11.11%        | 0.12%           | 2.81E-01 | <a href="#">SPT16</a>               |
| <a href="#">Cin5p</a>   | 33.33%        | 0.14%           | 2.84E-01 | SPT16 SEN1 RPT5                     |
| <a href="#">Hap2p</a>   | 22.22%        | 0.12%           | 3.33E-01 | RPN1 SMF2                           |
| <a href="#">Gcr1p</a>   | 22.22%        | 0.12%           | 3.41E-01 | RPN6 CCT2                           |

|                        |        |       |          |                                |
|------------------------|--------|-------|----------|--------------------------------|
| <a href="#">Yap6p</a>  | 11.11% | 0.10% | 3.55E-01 | <a href="#">RPT5</a>           |
| <a href="#">Mig3p</a>  | 22.22% | 0.12% | 3.55E-01 | RPN5 SMF2                      |
| <a href="#">Flo8p</a>  | 11.11% | 0.10% | 3.56E-01 | <a href="#">RPN6</a>           |
| <a href="#">Hms1p</a>  | 11.11% | 0.10% | 3.63E-01 | <a href="#">RPN6</a>           |
| <a href="#">Hap4p</a>  | 11.11% | 0.10% | 3.65E-01 | <a href="#">SMF2</a>           |
| <a href="#">Ace2p</a>  | 66.67% | 0.13% | 3.85E-01 | RPN5 SPT16 SMF2 CCT2 SEN1 RPT5 |
| <a href="#">Skn7p</a>  | 11.11% | 0.09% | 3.95E-01 | <a href="#">RPN1</a>           |
| <a href="#">Pho2p</a>  | 11.11% | 0.09% | 4.03E-01 | <a href="#">SEN1</a>           |
| <a href="#">Cup9p</a>  | 11.11% | 0.09% | 4.09E-01 | <a href="#">RPN1</a>           |
| <a href="#">Spt23p</a> | 22.22% | 0.11% | 4.17E-01 | RPN5 SEN1                      |
| <a href="#">Mga2p</a>  | 11.11% | 0.09% | 4.19E-01 | <a href="#">RPN5</a>           |
| <a href="#">Fkh1p</a>  | 33.33% | 0.11% | 4.39E-01 | CDC53 RPN1 SMF2                |
| <a href="#">Stb5p</a>  | 11.11% | 0.09% | 4.45E-01 | <a href="#">SEN1</a>           |
| <a href="#">Yap1p</a>  | 44.44% | 0.12% | 4.62E-01 | RPN6 RPN5 RPN1 CCT2            |
| <a href="#">Tye7p</a>  | 11.11% | 0.08% | 4.80E-01 | <a href="#">SPT16</a>          |
| <a href="#">Yrr1p</a>  | 11.11% | 0.08% | 5.02E-01 | <a href="#">SPT16</a>          |
| <a href="#">Yhp1p</a>  | 11.11% | 0.08% | 5.03E-01 | <a href="#">RPN5</a>           |
| <a href="#">Xbp1p</a>  | 11.11% | 0.07% | 5.55E-01 | <a href="#">SMF2</a>           |
| <a href="#">Aft1p</a>  | 11.11% | 0.07% | 5.55E-01 | <a href="#">RPT5</a>           |
| <a href="#">Rap1p</a>  | 33.33% | 0.10% | 5.69E-01 | CDC53 RPN5 SPT16               |
| <a href="#">Ino4p</a>  | 11.11% | 0.07% | 5.80E-01 | <a href="#">RPN6</a>           |
| <a href="#">Ume6p</a>  | 11.11% | 0.07% | 5.83E-01 | <a href="#">CCT2</a>           |
| <a href="#">Zap1p</a>  | 11.11% | 0.06% | 6.10E-01 | <a href="#">RPT5</a>           |
| <a href="#">Met4p</a>  | 11.11% | 0.06% | 6.14E-01 | <a href="#">CCT2</a>           |
| <a href="#">Yrm1p</a>  | 22.22% | 0.08% | 6.98E-01 | SMF2 SEN1                      |
| <a href="#">Swi5p</a>  | 11.11% | 0.05% | 7.51E-01 | <a href="#">CDC53</a>          |
| <a href="#">Fkh2p</a>  | 11.11% | 0.05% | 7.78E-01 | <a href="#">SMF2</a>           |
| <a href="#">Tec1p</a>  | 33.33% | 0.08% | 8.11E-01 | CDC53 SPT16 SEN1               |
| <a href="#">Ash1p</a>  | 22.22% | 0.06% | 8.46E-01 | SPT16 SEN1                     |
| <a href="#">Msn2p</a>  | 22.22% | 0.06% | 8.88E-01 | CDC53 SMF2                     |
| <a href="#">Msn4p</a>  | 11.11% | 0.04% | 8.91E-01 | <a href="#">SMF2</a>           |
| <a href="#">Gcn4p</a>  | 11.11% | 0.03% | 9.44E-01 | <a href="#">CDC53</a>          |
| <a href="#">Bas1p</a>  | 11.11% | 0.03% | 9.45E-01 | <a href="#">SMF2</a>           |
| <a href="#">Ste12p</a> | 11.11% | 0.03% | 9.89E-01 | <a href="#">RPN1</a>           |

Subnetwork 7

| Transcription Factor    | % in user set | % in Yeasttract | p-value  | Target ORF/Genes                            |
|-------------------------|---------------|-----------------|----------|---------------------------------------------|
| <a href="#">Rpi1p</a>   | 25.00%        | 1.15%           | 7.30E-04 | YDL211C YLR257W                             |
| <a href="#">Cin5p</a>   | 75.00%        | 0.28%           | 1.46E-03 | YDL211C HLR1 MSP1 SNX4 LHS1<br>YLR257W      |
| <a href="#">Hac1p</a>   | 37.50%        | 0.50%           | 2.70E-03 | HLR1 MSP1 LHS1                              |
| <a href="#">Tup1p</a>   | 75.00%        | 0.23%           | 5.42E-03 | MSP1 SNP1 SNX4 LHS1 YLR257W<br>COG8         |
| <a href="#">Tec1p</a>   | 87.50%        | 0.18%           | 6.73E-03 | YDL211C HLR1 MSP1 SNP1 SNX4 LHS1<br>YLR257W |
| <a href="#">Ste12p</a>  | 87.50%        | 0.18%           | 7.22E-03 | HLR1 MSP1 SNP1 SNX4 LHS1<br>YLR257W COG8    |
| <a href="#">Mot2p</a>   | 12.50%        | 0.81%           | 7.84E-03 | <a href="#">YDL211C</a>                     |
| <a href="#">Aro80p</a>  | 25.00%        | 0.47%           | 9.64E-03 | YDL211C LHS1                                |
| <a href="#">Wtm2p</a>   | 12.50%        | 0.59%           | 1.42E-02 | <a href="#">YLR257W</a>                     |
| <a href="#">YJL206C</a> | 12.50%        | 0.58%           | 1.47E-02 | <a href="#">LHS1</a>                        |
| <a href="#">YGR067C</a> | 12.50%        | 0.55%           | 1.66E-02 | <a href="#">YLR257W</a>                     |
| <a href="#">Ppr1p</a>   | 12.50%        | 0.52%           | 1.85E-02 | <a href="#">YLR257W</a>                     |
| <a href="#">Met32p</a>  | 25.00%        | 0.36%           | 1.90E-02 | YDL211C HLR1                                |
| <a href="#">Skn7p</a>   | 37.50%        | 0.28%           | 2.05E-02 | HLR1 SNP1 YLR257W                           |
| <a href="#">Hsf1p</a>   | 50.00%        | 0.23%           | 2.45E-02 | YDL211C HLR1 MSP1 LHS1                      |
| <a href="#">Gat1p</a>   | 12.50%        | 0.44%           | 2.49E-02 | <a href="#">SNX4</a>                        |
| <a href="#">Sum1p</a>   | 25.00%        | 0.32%           | 2.63E-02 | YDL211C YLR257W                             |
| <a href="#">Msn2p</a>   | 75.00%        | 0.18%           | 2.68E-02 | YDL211C HLR1 MSP1 SNX4 YLR257W<br>COG8      |
| <a href="#">Crz1p</a>   | 25.00%        | 0.31%           | 2.85E-02 | YDL211C YLR257W                             |
| <a href="#">Mal33p</a>  | 25.00%        | 0.31%           | 2.86E-02 | YDL211C LHS1                                |
| <a href="#">Ino2p</a>   | 25.00%        | 0.30%           | 3.11E-02 | MSP1 LHS1                                   |
| <a href="#">Haa1p</a>   | 25.00%        | 0.30%           | 3.21E-02 | MSP1 YLR257W                                |
| <a href="#">Hal9p</a>   | 12.50%        | 0.37%           | 3.51E-02 | <a href="#">YDL211C</a>                     |
| <a href="#">Rfx1p</a>   | 25.00%        | 0.28%           | 3.67E-02 | SNP1 LHS1                                   |
| <a href="#">Aca1p</a>   | 12.50%        | 0.35%           | 3.80E-02 | <a href="#">YDL211C</a>                     |
| <a href="#">Swi5p</a>   | 50.00%        | 0.21%           | 3.92E-02 | YDL211C HLR1 SNX4 LHS1                      |
| <a href="#">Ace2p</a>   | 87.50%        | 0.15%           | 4.04E-02 | YDL211C HLR1 SNP1 SNX4 LHS1<br>YLR257W COG8 |
| <a href="#">Hap3p</a>   | 12.50%        | 0.33%           | 4.33E-02 | <a href="#">LHS1</a>                        |
| <a href="#">Phd1p</a>   | 25.00%        | 0.26%           | 4.54E-02 | HLR1 LHS1                                   |
| <a href="#">Uga3p</a>   | 12.50%        | 0.31%           | 4.67E-02 | <a href="#">YLR257W</a>                     |
| <a href="#">Fkh2p</a>   | 50.00%        | 0.20%           | 4.77E-02 | MSP1 SNX4 YLR257W COG8                      |
| <a href="#">Cad1p</a>   | 25.00%        | 0.25%           | 5.08E-02 | YDL211C YLR257W                             |
| <a href="#">Pho4p</a>   | 37.50%        | 0.21%           | 5.39E-02 | MSP1 SNX4 YLR257W                           |
| <a href="#">Arg81p</a>  | 12.50%        | 0.29%           | 5.52E-02 | <a href="#">LHS1</a>                        |
| <a href="#">Yox1p</a>   | 37.50%        | 0.21%           | 5.65E-02 | YDL211C HLR1 MSP1                           |
| <a href="#">Dal81p</a>  | 12.50%        | 0.27%           | 6.08E-02 | <a href="#">YLR257W</a>                     |
| <a href="#">Kar4p</a>   | 25.00%        | 0.23%           | 6.16E-02 | YDL211C SNX4                                |

|                         |        |       |          |                                |
|-------------------------|--------|-------|----------|--------------------------------|
| <a href="#">Gcn4p</a>   | 62.50% | 0.17% | 6.32E-02 | YDL211C HLR1 SNP1 LHS1 YLR257W |
| <a href="#">Yap5p</a>   | 25.00% | 0.23% | 6.43E-02 | HLR1 COG8                      |
| <a href="#">Oaf1p</a>   | 25.00% | 0.22% | 6.73E-02 | HLR1 YLR257W                   |
| <a href="#">Rgm1p</a>   | 12.50% | 0.25% | 6.89E-02 | <a href="#">YLR257W</a>        |
| <a href="#">Cbf1p</a>   | 37.50% | 0.20% | 6.97E-02 | HLR1 LHS1 YLR257W              |
| <a href="#">Sok2p</a>   | 50.00% | 0.18% | 7.16E-02 | YDL211C HLR1 SNX4 YLR257W      |
| <a href="#">Zap1p</a>   | 37.50% | 0.19% | 7.18E-02 | YDL211C LHS1 YLR257W           |
| <a href="#">Rme1p</a>   | 12.50% | 0.24% | 7.55E-02 | <a href="#">YDL211C</a>        |
| <a href="#">Hcm1p</a>   | 12.50% | 0.23% | 8.14E-02 | <a href="#">HLR1</a>           |
| <a href="#">Gat3p</a>   | 12.50% | 0.22% | 8.53E-02 | <a href="#">YLR257W</a>        |
| <a href="#">Hap5p</a>   | 12.50% | 0.22% | 8.63E-02 | <a href="#">HLR1</a>           |
| <a href="#">Mig1p</a>   | 12.50% | 0.22% | 8.73E-02 | <a href="#">HLR1</a>           |
| <a href="#">Reb1p</a>   | 25.00% | 0.20% | 9.30E-02 | LHS1 YLR257W                   |
| <a href="#">Mcm1p</a>   | 37.50% | 0.18% | 9.32E-02 | HLR1 MSP1 YLR257W              |
| <a href="#">Ifh1p</a>   | 12.50% | 0.19% | 1.11E-01 | <a href="#">MSP1</a>           |
| <a href="#">Aft2p</a>   | 12.50% | 0.19% | 1.12E-01 | <a href="#">YLR257W</a>        |
| <a href="#">Mga2p</a>   | 25.00% | 0.18% | 1.14E-01 | MSP1 LHS1                      |
| <a href="#">Spt23p</a>  | 37.50% | 0.16% | 1.23E-01 | MSP1 SNX4 YLR257W              |
| <a href="#">Cup2p</a>   | 12.50% | 0.17% | 1.33E-01 | <a href="#">YLR257W</a>        |
| <a href="#">Gln3p</a>   | 25.00% | 0.17% | 1.35E-01 | LHS1 YLR257W                   |
| <a href="#">Cst6p</a>   | 50.00% | 0.15% | 1.48E-01 | MSP1 SNP1 LHS1 COG8            |
| <a href="#">Yhp1p</a>   | 25.00% | 0.16% | 1.62E-01 | HLR1 YLR257W                   |
| <a href="#">Mbp1p</a>   | 12.50% | 0.14% | 1.80E-01 | <a href="#">HLR1</a>           |
| <a href="#">Rph1p</a>   | 12.50% | 0.14% | 1.86E-01 | <a href="#">LHS1</a>           |
| <a href="#">Rlm1p</a>   | 12.50% | 0.14% | 1.87E-01 | <a href="#">LHS1</a>           |
| <a href="#">Stp1p</a>   | 12.50% | 0.14% | 1.90E-01 | <a href="#">YLR257W</a>        |
| <a href="#">Xbp1p</a>   | 25.00% | 0.14% | 1.97E-01 | LHS1 YLR257W                   |
| <a href="#">Ino4p</a>   | 25.00% | 0.14% | 2.15E-01 | MSP1 LHS1                      |
| <a href="#">Ume6p</a>   | 25.00% | 0.14% | 2.17E-01 | SNX4 LHS1                      |
| <a href="#">Thi2p</a>   | 12.50% | 0.13% | 2.23E-01 | <a href="#">YDL211C</a>        |
| <a href="#">Dal82p</a>  | 12.50% | 0.12% | 2.29E-01 | <a href="#">YDL211C</a>        |
| <a href="#">Met4p</a>   | 25.00% | 0.13% | 2.42E-01 | SNX4 COG8                      |
| <a href="#">Ash1p</a>   | 50.00% | 0.13% | 2.54E-01 | YDL211C SNX4 LHS1 COG8         |
| <a href="#">Rox1p</a>   | 12.50% | 0.11% | 2.69E-01 | <a href="#">COG8</a>           |
| <a href="#">Gcr1p</a>   | 25.00% | 0.12% | 2.70E-01 | LHS1 YLR257W                   |
| <a href="#">Mig3p</a>   | 25.00% | 0.12% | 2.82E-01 | YDL211C YLR257W                |
| <a href="#">Flo8p</a>   | 12.50% | 0.10% | 3.02E-01 | <a href="#">YLR257W</a>        |
| <a href="#">Hap4p</a>   | 12.50% | 0.10% | 3.11E-01 | <a href="#">HLR1</a>           |
| <a href="#">Msn4p</a>   | 37.50% | 0.12% | 3.15E-01 | YDL211C HLR1 MSP1              |
| <a href="#">Rpn4p</a>   | 25.00% | 0.11% | 3.23E-01 | SNP1 YLR257W                   |
| <a href="#">Yrm1p</a>   | 37.50% | 0.12% | 3.27E-01 | SNX4 LHS1 COG8                 |
| <a href="#">Yap1p</a>   | 50.00% | 0.12% | 3.30E-01 | YDL211C SNX4 LHS1 YLR257W      |
| <a href="#">Sfp1p</a>   | 62.50% | 0.12% | 3.32E-01 | YDL211C MSP1 SNX4 YLR257W COG8 |
| <a href="#">Fkh1p</a>   | 37.50% | 0.11% | 3.35E-01 | SNX4 YLR257W COG8              |
| <a href="#">Rim101p</a> | 25.00% | 0.11% | 3.47E-01 | SNX4 YLR257W                   |
| <a href="#">Cup9p</a>   | 12.50% | 0.09% | 3.51E-01 | <a href="#">SNX4</a>           |
| <a href="#">Pdr3p</a>   | 12.50% | 0.08% | 3.91E-01 | <a href="#">MSP1</a>           |



|                       |        |       |          |                         |
|-----------------------|--------|-------|----------|-------------------------|
| <a href="#">Tye7p</a> | 12.50% | 0.08% | 4.17E-01 | <a href="#">YDL211C</a> |
| <a href="#">Fhl1p</a> | 12.50% | 0.08% | 4.21E-01 | <a href="#">MSP1</a>    |
| <a href="#">Yrr1p</a> | 12.50% | 0.08% | 4.37E-01 | <a href="#">MSP1</a>    |
| <a href="#">Bas1p</a> | 37.50% | 0.10% | 4.55E-01 | YDL211C SNX4 LHS1       |
| <a href="#">Pdr1p</a> | 12.50% | 0.07% | 5.02E-01 | <a href="#">MSP1</a>    |
| <a href="#">Arr1p</a> | 12.50% | 0.06% | 5.67E-01 | <a href="#">HLR1</a>    |
| <a href="#">Ixr1p</a> | 12.50% | 0.06% | 6.15E-01 | <a href="#">SNP1</a>    |
| <a href="#">Abf1p</a> | 25.00% | 0.07% | 6.74E-01 | LHS1 YLR257W            |
| <a href="#">Rap1p</a> | 25.00% | 0.07% | 7.27E-01 | MSP1 YLR257W            |

Subnetwork 8

| Transcription Factor   | % in user set | % in Yeasttract | p-value  | Target ORF/Genes                      |
|------------------------|---------------|-----------------|----------|---------------------------------------|
| <a href="#">Upc2p</a>  | 25.00%        | 0.63%           | 4.16E-03 | ERG3 ERG24                            |
| <a href="#">Yap3p</a>  | 25.00%        | 0.60%           | 4.82E-03 | PRR1 ERG3                             |
| <a href="#">Aro80p</a> | 25.00%        | 0.47%           | 9.64E-03 | PRR1 ERG24                            |
| <a href="#">Mig1p</a>  | 25.00%        | 0.44%           | 1.12E-02 | PCM1 ERG24                            |
| <a href="#">Rpi1p</a>  | 12.50%        | 0.57%           | 1.50E-02 | <a href="#">MSC7</a>                  |
| <a href="#">Plm2p</a>  | 12.50%        | 0.54%           | 1.69E-02 | <a href="#">MTR3</a>                  |
| <a href="#">Ecm22p</a> | 25.00%        | 0.38%           | 1.74E-02 | MSC7 ERG3                             |
| <a href="#">Wtm1p</a>  | 12.50%        | 0.53%           | 1.76E-02 | <a href="#">MTR3</a>                  |
| <a href="#">Fzf1p</a>  | 12.50%        | 0.49%           | 2.03E-02 | <a href="#">TAE2</a>                  |
| <a href="#">Ndt80p</a> | 25.00%        | 0.35%           | 2.12E-02 | ERG3 APM4                             |
| <a href="#">Cup9p</a>  | 37.50%        | 0.28%           | 2.26E-02 | PCM1 PRR1 ERG3                        |
| <a href="#">Tda9p</a>  | 12.50%        | 0.45%           | 2.43E-02 | <a href="#">ERG3</a>                  |
| <a href="#">Rpn4p</a>  | 50.00%        | 0.22%           | 2.75E-02 | PCM1 PRR1 ERG3 ERG24                  |
| <a href="#">Put3p</a>  | 25.00%        | 0.30%           | 3.09E-02 | PCM1 ERG3                             |
| <a href="#">Leu3p</a>  | 25.00%        | 0.30%           | 3.17E-02 | PRR1 ERG3                             |
| <a href="#">Gal4p</a>  | 37.50%        | 0.25%           | 3.30E-02 | PCM1 PRR1 ERG3                        |
| <a href="#">Tye7p</a>  | 37.50%        | 0.24%           | 3.51E-02 | PCM1 PRR1 ERG3                        |
| <a href="#">Aca1p</a>  | 12.50%        | 0.35%           | 3.80E-02 | <a href="#">ERG3</a>                  |
| <a href="#">Swi5p</a>  | 50.00%        | 0.21%           | 3.92E-02 | MTR3 MSC7 PRR1 ERG3                   |
| <a href="#">Yhp1p</a>  | 37.50%        | 0.23%           | 4.01E-02 | MSC7 PRR1 ERG3                        |
| <a href="#">Ace2p</a>  | 87.50%        | 0.15%           | 4.04E-02 | PCM1 MTR3 MSC7 PRR1 ERG3 APM4<br>TAE2 |
| <a href="#">Pip2p</a>  | 37.50%        | 0.23%           | 4.21E-02 | PCM1 PRR1 ERG3                        |
| <a href="#">Tec1p</a>  | 75.00%        | 0.16%           | 5.35E-02 | PCM1 MSC7 PRR1 ERG24 APM4 TAE2        |
| <a href="#">Hap1p</a>  | 12.50%        | 0.29%           | 5.47E-02 | <a href="#">ERG3</a>                  |
| <a href="#">Yox1p</a>  | 37.50%        | 0.21%           | 5.65E-02 | MSC7 PRR1 ERG3                        |
| <a href="#">Bas1p</a>  | 62.50%        | 0.17%           | 6.40E-02 | PCM1 MSC7 PRR1 ERG3 TAE2              |
| <a href="#">Opi1p</a>  | 12.50%        | 0.26%           | 6.46E-02 | <a href="#">MSC7</a>                  |
| <a href="#">Tos8p</a>  | 12.50%        | 0.25%           | 7.27E-02 | <a href="#">MSC7</a>                  |
| <a href="#">Hcm1p</a>  | 12.50%        | 0.23%           | 8.14E-02 | <a href="#">PCM1</a>                  |
| <a href="#">Arr1p</a>  | 37.50%        | 0.19%           | 8.15E-02 | PRR1 ERG3 ERG24                       |
| <a href="#">Gat3p</a>  | 12.50%        | 0.22%           | 8.53E-02 | <a href="#">APM4</a>                  |
| <a href="#">Hms1p</a>  | 25.00%        | 0.20%           | 8.80E-02 | PCM1 ERG3                             |
| <a href="#">Mac1p</a>  | 12.50%        | 0.22%           | 9.14E-02 | <a href="#">ERG3</a>                  |
| <a href="#">Mig3p</a>  | 37.50%        | 0.18%           | 9.29E-02 | MSC7 ERG24 APM4                       |
| <a href="#">Rgt1p</a>  | 12.50%        | 0.20%           | 1.03E-01 | <a href="#">ERG3</a>                  |
| <a href="#">Swi4p</a>  | 25.00%        | 0.19%           | 1.05E-01 | ERG3 TAE2                             |
| <a href="#">Tbf1p</a>  | 12.50%        | 0.20%           | 1.06E-01 | <a href="#">ERG3</a>                  |
| <a href="#">Ifh1p</a>  | 12.50%        | 0.19%           | 1.11E-01 | <a href="#">MSC7</a>                  |
| <a href="#">Mga2p</a>  | 25.00%        | 0.18%           | 1.14E-01 | MTR3 ERG3                             |
| <a href="#">Yrm1p</a>  | 50.00%        | 0.15%           | 1.25E-01 | MTR3 ERG3 APM4 TAE2                   |
| <a href="#">Rds2p</a>  | 12.50%        | 0.18%           | 1.26E-01 | <a href="#">ERG3</a>                  |
| <a href="#">Stb5p</a>  | 25.00%        | 0.17%           | 1.28E-01 | PCM1 ERG3                             |

|                         |        |       |          |                          |
|-------------------------|--------|-------|----------|--------------------------|
| <a href="#">Rim101p</a> | 37.50% | 0.16% | 1.28E-01 | PCM1 ERG3 ERG24          |
| <a href="#">Gln3p</a>   | 25.00% | 0.17% | 1.35E-01 | MTR3 PRR1                |
| <a href="#">Tup1p</a>   | 50.00% | 0.15% | 1.35E-01 | PCM1 MTR3 PRR1 ERG3      |
| <a href="#">Mot3p</a>   | 12.50% | 0.17% | 1.37E-01 | <a href="#">ERG3</a>     |
| <a href="#">Hac1p</a>   | 12.50% | 0.17% | 1.43E-01 | <a href="#">ERG3</a>     |
| <a href="#">Cst6p</a>   | 50.00% | 0.15% | 1.48E-01 | PCM1 MTR3 PRR1 ERG3      |
| <a href="#">Mal33p</a>  | 12.50% | 0.16% | 1.57E-01 | <a href="#">PRR1</a>     |
| <a href="#">Ino2p</a>   | 12.50% | 0.15% | 1.65E-01 | <a href="#">ERG3</a>     |
| <a href="#">Haa1p</a>   | 12.50% | 0.15% | 1.69E-01 | <a href="#">MSC7</a>     |
| <a href="#">Yap7p</a>   | 12.50% | 0.14% | 1.79E-01 | <a href="#">ERG3</a>     |
| <a href="#">Mga1p</a>   | 12.50% | 0.14% | 1.83E-01 | <a href="#">PCM1</a>     |
| <a href="#">Rfx1p</a>   | 12.50% | 0.14% | 1.83E-01 | <a href="#">ERG3</a>     |
| <a href="#">Rlm1p</a>   | 12.50% | 0.14% | 1.87E-01 | <a href="#">PCM1</a>     |
| <a href="#">Aft1p</a>   | 25.00% | 0.14% | 1.97E-01 | ERG3 ERG24               |
| <a href="#">Pho4p</a>   | 25.00% | 0.14% | 1.98E-01 | PRR1 APM4                |
| <a href="#">Cin5p</a>   | 37.50% | 0.14% | 2.05E-01 | PCM1 PRR1 ERG3           |
| <a href="#">Ino4p</a>   | 25.00% | 0.14% | 2.15E-01 | ERG3 TAE2                |
| <a href="#">Thi2p</a>   | 12.50% | 0.13% | 2.23E-01 | <a href="#">ERG3</a>     |
| <a href="#">Sok2p</a>   | 37.50% | 0.13% | 2.25E-01 | PCM1 ERG3 ERG24          |
| <a href="#">Dal82p</a>  | 12.50% | 0.12% | 2.29E-01 | <a href="#">ERG24</a>    |
| <a href="#">Zap1p</a>   | 25.00% | 0.13% | 2.39E-01 | ERG3 ERG24               |
| <a href="#">Kar4p</a>   | 12.50% | 0.12% | 2.50E-01 | <a href="#">ERG3</a>     |
| <a href="#">Oaf1p</a>   | 12.50% | 0.11% | 2.64E-01 | <a href="#">PCM1</a>     |
| <a href="#">Rox1p</a>   | 12.50% | 0.11% | 2.69E-01 | <a href="#">ERG3</a>     |
| <a href="#">Gcr1p</a>   | 25.00% | 0.12% | 2.70E-01 | PCM1 ERG3                |
| <a href="#">Mcm1p</a>   | 25.00% | 0.12% | 2.83E-01 | PCM1 ERG3                |
| <a href="#">Yap6p</a>   | 12.50% | 0.10% | 3.01E-01 | <a href="#">APM4</a>     |
| <a href="#">Hap4p</a>   | 12.50% | 0.10% | 3.11E-01 | <a href="#">PCM1</a>     |
| <a href="#">Msn4p</a>   | 37.50% | 0.12% | 3.15E-01 | MSC7 ERG3 TAE2           |
| <a href="#">Sfp1p</a>   | 62.50% | 0.12% | 3.32E-01 | PCM1 MTR3 MSC7 ERG3 TAE2 |
| <a href="#">Pho2p</a>   | 12.50% | 0.09% | 3.45E-01 | <a href="#">TAE2</a>     |
| <a href="#">Fhl1p</a>   | 12.50% | 0.08% | 4.21E-01 | <a href="#">PCM1</a>     |
| <a href="#">Yrr1p</a>   | 12.50% | 0.08% | 4.37E-01 | <a href="#">MTR3</a>     |
| <a href="#">Rap1p</a>   | 37.50% | 0.10% | 4.55E-01 | PCM1 PRR1 ERG3           |
| <a href="#">Xbp1p</a>   | 12.50% | 0.07% | 4.88E-01 | <a href="#">ERG3</a>     |
| <a href="#">Pdr1p</a>   | 12.50% | 0.07% | 5.02E-01 | <a href="#">MTR3</a>     |
| <a href="#">Ash1p</a>   | 37.50% | 0.09% | 5.16E-01 | ERG3 APM4 TAE2           |
| <a href="#">Yap1p</a>   | 37.50% | 0.09% | 6.02E-01 | ERG3 ERG24 TAE2          |
| <a href="#">Ixr1p</a>   | 12.50% | 0.06% | 6.15E-01 | <a href="#">PRR1</a>     |
| <a href="#">Hsf1p</a>   | 12.50% | 0.06% | 6.17E-01 | <a href="#">TAE2</a>     |
| <a href="#">Spt23p</a>  | 12.50% | 0.05% | 6.48E-01 | <a href="#">ERG3</a>     |
| <a href="#">Ste12p</a>  | 37.50% | 0.08% | 7.21E-01 | PRR1 ERG3 ERG24          |
| <a href="#">Gcn4p</a>   | 25.00% | 0.07% | 7.25E-01 | PCM1 APM4                |
| <a href="#">Msn2p</a>   | 25.00% | 0.06% | 8.26E-01 | ERG3 TAE2                |
| <a href="#">Abf1p</a>   | 12.50% | 0.04% | 8.88E-01 | <a href="#">ERG3</a>     |

Subnetwork 9

| Transcription Factor    | % in user set | % in Yeasttract | p-value  | Target ORF/Genes             |
|-------------------------|---------------|-----------------|----------|------------------------------|
| <a href="#">Mcm1p</a>   | 71.43%        | 0.30%           | 9.22E-04 | UBP5 YGL193C OST5 STE18 DIA2 |
| <a href="#">Yrr1p</a>   | 57.14%        | 0.31%           | 2.87E-03 | UBP5 YGL193C OST5 EMC2       |
| <a href="#">Rsc30p</a>  | 14.29%        | 0.98%           | 4.06E-03 | <a href="#">STE18</a>        |
| <a href="#">Hms2p</a>   | 14.29%        | 0.87%           | 5.13E-03 | <a href="#">EMC2</a>         |
| <a href="#">Hap2p</a>   | 57.14%        | 0.25%           | 8.18E-03 | YGL193C STE18 ELF1 DIA2      |
| <a href="#">Dot6p</a>   | 14.29%        | 0.63%           | 9.63E-03 | <a href="#">STE18</a>        |
| <a href="#">Reb1p</a>   | 42.86%        | 0.29%           | 1.00E-02 | YGL193C OST5 STE18           |
| <a href="#">Fkh1p</a>   | 71.43%        | 0.19%           | 1.21E-02 | UBP5 YGL193C OST5 STE18 EMC2 |
| <a href="#">Wtm1p</a>   | 14.29%        | 0.53%           | 1.34E-02 | <a href="#">EMC2</a>         |
| <a href="#">Abf1p</a>   | 71.43%        | 0.18%           | 1.75E-02 | UBP5 OST5 STE18 EMC2 ELF1    |
| <a href="#">Tda9p</a>   | 14.29%        | 0.45%           | 1.86E-02 | <a href="#">ELF1</a>         |
| <a href="#">Tye7p</a>   | 42.86%        | 0.24%           | 2.03E-02 | STE18 EMC2 ELF1              |
| <a href="#">Pip2p</a>   | 42.86%        | 0.23%           | 2.46E-02 | YGL193C STE18 ELF1           |
| <a href="#">Rfx1p</a>   | 28.57%        | 0.28%           | 2.47E-02 | UBP5 EMC2                    |
| <a href="#">Mga1p</a>   | 28.57%        | 0.28%           | 2.47E-02 | EMC2 DIA2                    |
| <a href="#">Msn1p</a>   | 14.29%        | 0.35%           | 2.96E-02 | <a href="#">UBP5</a>         |
| <a href="#">Aft1p</a>   | 42.86%        | 0.21%           | 3.16E-02 | UBP5 YGL193C STE18           |
| <a href="#">Hap3p</a>   | 14.29%        | 0.33%           | 3.34E-02 | <a href="#">YGL193C</a>      |
| <a href="#">Thi2p</a>   | 28.57%        | 0.25%           | 3.47E-02 | STE18 ELF1                   |
| <a href="#">Upc2p</a>   | 14.29%        | 0.31%           | 3.59E-02 | <a href="#">EMC2</a>         |
| <a href="#">Uga3p</a>   | 14.29%        | 0.31%           | 3.61E-02 | <a href="#">ELF1</a>         |
| <a href="#">Yap3p</a>   | 14.29%        | 0.30%           | 3.95E-02 | <a href="#">OST5</a>         |
| <a href="#">Mth1p</a>   | 14.29%        | 0.29%           | 4.21E-02 | <a href="#">ELF1</a>         |
| <a href="#">Kar4p</a>   | 28.57%        | 0.23%           | 4.22E-02 | YGL193C ELF1                 |
| <a href="#">Hap1p</a>   | 14.29%        | 0.29%           | 4.23E-02 | <a href="#">YGL193C</a>      |
| <a href="#">Tos8p</a>   | 14.29%        | 0.25%           | 5.66E-02 | <a href="#">EMC2</a>         |
| <a href="#">Flo8p</a>   | 28.57%        | 0.20%           | 5.87E-02 | STE18 DIA2                   |
| <a href="#">YLR278C</a> | 14.29%        | 0.24%           | 6.09E-02 | <a href="#">ELF1</a>         |
| <a href="#">Hap4p</a>   | 28.57%        | 0.20%           | 6.18E-02 | YGL193C OST5                 |
| <a href="#">Aro80p</a>  | 14.29%        | 0.23%           | 6.20E-02 | <a href="#">ELF1</a>         |
| <a href="#">Hsf1p</a>   | 42.86%        | 0.17%           | 6.49E-02 | UBP5 OST5 DIA2               |
| <a href="#">Hap5p</a>   | 14.29%        | 0.22%           | 6.75E-02 | <a href="#">YGL193C</a>      |
| <a href="#">Tup1p</a>   | 57.14%        | 0.15%           | 7.26E-02 | UBP5 YGL193C ELF1 DIA2       |
| <a href="#">Cup9p</a>   | 28.57%        | 0.18%           | 7.68E-02 | STE18 ELF1                   |
| <a href="#">Cst6p</a>   | 57.14%        | 0.15%           | 8.06E-02 | UBP5 YGL193C ELF1 DIA2       |
| <a href="#">Stb5p</a>   | 28.57%        | 0.17%           | 9.06E-02 | UBP5 EMC2                    |
| <a href="#">Rds2p</a>   | 14.29%        | 0.18%           | 9.98E-02 | <a href="#">ELF1</a>         |
| <a href="#">Gal4p</a>   | 28.57%        | 0.16%           | 1.01E-01 | STE18 ELF1                   |
| <a href="#">Fhl1p</a>   | 28.57%        | 0.16%           | 1.08E-01 | UBP5 STE18                   |
| <a href="#">Hac1p</a>   | 14.29%        | 0.17%           | 1.13E-01 | <a href="#">ELF1</a>         |
| <a href="#">Mss11p</a>  | 14.29%        | 0.17%           | 1.14E-01 | <a href="#">ELF1</a>         |
| <a href="#">Rap1p</a>   | 57.14%        | 0.13%           | 1.18E-01 | UBP5 OST5 EMC2 DIA2          |
| <a href="#">Crz1p</a>   | 14.29%        | 0.16%           | 1.24E-01 | <a href="#">UBP5</a>         |

|                        |        |       |          |                         |
|------------------------|--------|-------|----------|-------------------------|
| <a href="#">Mal33p</a> | 14.29% | 0.16% | 1.25E-01 | <a href="#">ELF1</a>    |
| <a href="#">Stp2p</a>  | 14.29% | 0.16% | 1.26E-01 | <a href="#">STE18</a>   |
| <a href="#">Put3p</a>  | 14.29% | 0.15% | 1.31E-01 | <a href="#">ELF1</a>    |
| <a href="#">Leu3p</a>  | 14.29% | 0.15% | 1.33E-01 | <a href="#">ELF1</a>    |
| <a href="#">Haa1p</a>  | 14.29% | 0.15% | 1.34E-01 | <a href="#">OST5</a>    |
| <a href="#">Rtg3p</a>  | 14.29% | 0.15% | 1.36E-01 | <a href="#">ELF1</a>    |
| <a href="#">Yox1p</a>  | 28.57% | 0.14% | 1.49E-01 | STE18 ELF1              |
| <a href="#">Dal82p</a> | 14.29% | 0.12% | 1.85E-01 | <a href="#">UBP5</a>    |
| <a href="#">Adr1p</a>  | 14.29% | 0.12% | 1.91E-01 | <a href="#">UBP5</a>    |
| <a href="#">Mig3p</a>  | 28.57% | 0.12% | 2.11E-01 | YGL193C STE18           |
| <a href="#">Yrm1p</a>  | 42.86% | 0.12% | 2.26E-01 | UBP5 YGL193C DIA2       |
| <a href="#">Rpn4p</a>  | 28.57% | 0.11% | 2.45E-01 | YGL193C EMC2            |
| <a href="#">Hms1p</a>  | 14.29% | 0.10% | 2.54E-01 | <a href="#">ELF1</a>    |
| <a href="#">Spt23p</a> | 28.57% | 0.11% | 2.57E-01 | UBP5 DIA2               |
| <a href="#">Skn7p</a>  | 14.29% | 0.09% | 2.79E-01 | <a href="#">OST5</a>    |
| <a href="#">Swi4p</a>  | 14.29% | 0.09% | 2.83E-01 | <a href="#">DIA2</a>    |
| <a href="#">Pho2p</a>  | 14.29% | 0.09% | 2.85E-01 | <a href="#">STE18</a>   |
| <a href="#">Tec1p</a>  | 57.14% | 0.10% | 2.89E-01 | UBP5 YGL193C STE18 DIA2 |
| <a href="#">Swi5p</a>  | 28.57% | 0.10% | 2.92E-01 | OST5 ELF1               |
| <a href="#">Mga2p</a>  | 14.29% | 0.09% | 2.98E-01 | <a href="#">UBP5</a>    |
| <a href="#">Gln3p</a>  | 14.29% | 0.08% | 3.30E-01 | <a href="#">YGL193C</a> |
| <a href="#">Cin5p</a>  | 28.57% | 0.09% | 3.66E-01 | STE18 ELF1              |
| <a href="#">Yhp1p</a>  | 14.29% | 0.08% | 3.69E-01 | <a href="#">STE18</a>   |
| <a href="#">Ash1p</a>  | 42.86% | 0.09% | 3.85E-01 | UBP5 OST5 DIA2          |
| <a href="#">Xbp1p</a>  | 14.29% | 0.07% | 4.15E-01 | <a href="#">OST5</a>    |
| <a href="#">Pho4p</a>  | 14.29% | 0.07% | 4.17E-01 | <a href="#">DIA2</a>    |
| <a href="#">Pdr1p</a>  | 14.29% | 0.07% | 4.28E-01 | <a href="#">OST5</a>    |
| <a href="#">Sfp1p</a>  | 57.14% | 0.09% | 4.37E-01 | UBP5 YGL193C STE18 DIA2 |
| <a href="#">Ino4p</a>  | 14.29% | 0.07% | 4.38E-01 | <a href="#">UBP5</a>    |
| <a href="#">Cbf1p</a>  | 14.29% | 0.07% | 4.61E-01 | <a href="#">OST5</a>    |
| <a href="#">Zap1p</a>  | 14.29% | 0.06% | 4.66E-01 | <a href="#">DIA2</a>    |
| <a href="#">Arr1p</a>  | 14.29% | 0.06% | 4.90E-01 | <a href="#">YGL193C</a> |
| <a href="#">Msn4p</a>  | 28.57% | 0.08% | 4.91E-01 | STE18 DIA2              |
| <a href="#">Gcr1p</a>  | 14.29% | 0.06% | 5.02E-01 | <a href="#">OST5</a>    |
| <a href="#">Ste12p</a> | 42.86% | 0.08% | 5.87E-01 | UBP5 YGL193C STE18      |
| <a href="#">Gcn4p</a>  | 28.57% | 0.07% | 6.23E-01 | ELF1 DIA2               |
| <a href="#">Fkh2p</a>  | 14.29% | 0.05% | 6.40E-01 | <a href="#">OST5</a>    |
| <a href="#">Msn2p</a>  | 28.57% | 0.06% | 7.38E-01 | OST5 STE18              |
| <a href="#">Yap1p</a>  | 28.57% | 0.06% | 7.47E-01 | UBP5 DIA2               |
| <a href="#">Ace2p</a>  | 42.86% | 0.06% | 8.31E-01 | UBP5 OST5 ELF1          |
| <a href="#">Bas1p</a>  | 14.29% | 0.03% | 8.67E-01 | <a href="#">UBP5</a>    |

Subnetwork 10

| Transcription Factor    | % in user set | % in Yeasttract | p-value  | Target ORF/Genes         |
|-------------------------|---------------|-----------------|----------|--------------------------|
| <a href="#">Ppr1p</a>   | 33.33%        | 1.03%           | 3.73E-04 | SRB4 YKR051W             |
| <a href="#">YNR063W</a> | 16.67%        | 1.85%           | 8.28E-04 | <a href="#">ASP3-1</a>   |
| <a href="#">Rfx1p</a>   | 50.00%        | 0.43%           | 1.20E-03 | SRB4 RNR3 ASP3-1         |
| <a href="#">Ngg1p</a>   | 16.67%        | 1.45%           | 1.35E-03 | <a href="#">ASP3-1</a>   |
| <a href="#">Gal80p</a>  | 16.67%        | 1.16%           | 2.09E-03 | <a href="#">AVT2</a>     |
| <a href="#">Ime1p</a>   | 16.67%        | 0.81%           | 4.30E-03 | <a href="#">ASP3-1</a>   |
| <a href="#">Hap5p</a>   | 33.33%        | 0.44%           | 4.32E-03 | AVT2 RNR3                |
| <a href="#">YPR015C</a> | 16.67%        | 0.72%           | 5.30E-03 | <a href="#">RNR3</a>     |
| <a href="#">Gsm1p</a>   | 16.67%        | 0.59%           | 7.86E-03 | <a href="#">ASP3-1</a>   |
| <a href="#">Cup2p</a>   | 33.33%        | 0.35%           | 8.83E-03 | ASP3-1 EXO1              |
| <a href="#">Sut2p</a>   | 16.67%        | 0.54%           | 9.47E-03 | <a href="#">ASP3-1</a>   |
| <a href="#">Azf1p</a>   | 16.67%        | 0.51%           | 1.07E-02 | <a href="#">RNR3</a>     |
| <a href="#">Cha4p</a>   | 16.67%        | 0.46%           | 1.27E-02 | <a href="#">ASP3-1</a>   |
| <a href="#">Ino2p</a>   | 33.33%        | 0.30%           | 1.28E-02 | RNR3 ASP3-1              |
| <a href="#">Gat4p</a>   | 16.67%        | 0.46%           | 1.29E-02 | <a href="#">RNR3</a>     |
| <a href="#">Gat1p</a>   | 16.67%        | 0.44%           | 1.39E-02 | <a href="#">ASP3-1</a>   |
| <a href="#">Sip4p</a>   | 16.67%        | 0.40%           | 1.63E-02 | <a href="#">SRB4</a>     |
| <a href="#">Sef1p</a>   | 16.67%        | 0.40%           | 1.70E-02 | <a href="#">ASP3-1</a>   |
| <a href="#">Asg1p</a>   | 16.67%        | 0.39%           | 1.78E-02 | <a href="#">ASP3-1</a>   |
| <a href="#">Cad1p</a>   | 33.33%        | 0.25%           | 2.15E-02 | AVT2 RNR3                |
| <a href="#">Adr1p</a>   | 33.33%        | 0.24%           | 2.38E-02 | RNR3 ASP3-1              |
| <a href="#">Upc2p</a>   | 16.67%        | 0.31%           | 2.64E-02 | <a href="#">RNR3</a>     |
| <a href="#">Kar4p</a>   | 33.33%        | 0.23%           | 2.65E-02 | AVT2 RNR3                |
| <a href="#">Uga3p</a>   | 16.67%        | 0.31%           | 2.65E-02 | <a href="#">RNR3</a>     |
| <a href="#">Yap5p</a>   | 33.33%        | 0.23%           | 2.77E-02 | RNR3 ASP3-1              |
| <a href="#">Mth1p</a>   | 16.67%        | 0.29%           | 3.11E-02 | <a href="#">EXO1</a>     |
| <a href="#">Hap1p</a>   | 16.67%        | 0.29%           | 3.12E-02 | <a href="#">RNR3</a>     |
| <a href="#">Arg81p</a>  | 16.67%        | 0.29%           | 3.16E-02 | <a href="#">SRB4</a>     |
| <a href="#">Gis1p</a>   | 16.67%        | 0.26%           | 3.90E-02 | <a href="#">RNR3</a>     |
| <a href="#">Hap4p</a>   | 33.33%        | 0.20%           | 3.93E-02 | RNR3 EXO1                |
| <a href="#">Rgm1p</a>   | 16.67%        | 0.25%           | 3.97E-02 | <a href="#">ASP3-1</a>   |
| <a href="#">Arg80p</a>  | 16.67%        | 0.25%           | 3.97E-02 | <a href="#">EXO1</a>     |
| <a href="#">Tos8p</a>   | 16.67%        | 0.25%           | 4.20E-02 | <a href="#">RNR3</a>     |
| <a href="#">Rim101p</a> | 50.00%        | 0.16%           | 4.31E-02 | RNR3 ASP3-1 EXO1         |
| <a href="#">Rme1p</a>   | 16.67%        | 0.24%           | 4.37E-02 | <a href="#">RNR3</a>     |
| <a href="#">YLR278C</a> | 16.67%        | 0.24%           | 4.53E-02 | <a href="#">EXO1</a>     |
| <a href="#">Hcm1p</a>   | 16.67%        | 0.23%           | 4.72E-02 | <a href="#">SRB4</a>     |
| <a href="#">Cup9p</a>   | 33.33%        | 0.18%           | 4.94E-02 | SRB4 RNR3                |
| <a href="#">Gat3p</a>   | 16.67%        | 0.22%           | 4.97E-02 | <a href="#">RNR3</a>     |
| <a href="#">Gcn4p</a>   | 66.67%        | 0.13%           | 5.08E-02 | RNR3 YKR051W ASP3-1 EXO1 |
| <a href="#">Mig1p</a>   | 16.67%        | 0.22%           | 5.09E-02 | <a href="#">RNR3</a>     |
| <a href="#">Bas1p</a>   | 66.67%        | 0.13%           | 5.14E-02 | RNR3 YKR051W ASP3-1 EXO1 |
| <a href="#">Rgt1p</a>   | 16.67%        | 0.20%           | 6.07E-02 | <a href="#">EXO1</a>     |

|                        |        |       |          |                         |
|------------------------|--------|-------|----------|-------------------------|
| <a href="#">Gln3p</a>  | 33.33% | 0.17% | 6.21E-02 | RNR3 ASP3-1             |
| <a href="#">Sut1p</a>  | 16.67% | 0.18% | 7.23E-02 | <a href="#">RNR3</a>    |
| <a href="#">Met32p</a> | 16.67% | 0.18% | 7.23E-02 | <a href="#">RNR3</a>    |
| <a href="#">Mot3p</a>  | 16.67% | 0.17% | 8.17E-02 | <a href="#">RNR3</a>    |
| <a href="#">Mss11p</a> | 16.67% | 0.17% | 8.59E-02 | <a href="#">SRB4</a>    |
| <a href="#">Mal33p</a> | 16.67% | 0.16% | 9.46E-02 | <a href="#">ASP3-1</a>  |
| <a href="#">Yox1p</a>  | 33.33% | 0.14% | 9.92E-02 | RNR3 YKR051W            |
| <a href="#">Haa1p</a>  | 16.67% | 0.15% | 1.02E-01 | <a href="#">EXO1</a>    |
| <a href="#">Ino4p</a>  | 33.33% | 0.14% | 1.05E-01 | RNR3 YKR051W            |
| <a href="#">Ume6p</a>  | 33.33% | 0.14% | 1.07E-01 | RNR3 ASP3-1             |
| <a href="#">Yap7p</a>  | 16.67% | 0.14% | 1.09E-01 | <a href="#">RNR3</a>    |
| <a href="#">Mga1p</a>  | 16.67% | 0.14% | 1.12E-01 | <a href="#">ASP3-1</a>  |
| <a href="#">Rph1p</a>  | 16.67% | 0.14% | 1.14E-01 | <a href="#">ASP3-1</a>  |
| <a href="#">Rlm1p</a>  | 16.67% | 0.14% | 1.14E-01 | <a href="#">ASP3-1</a>  |
| <a href="#">Cbf1p</a>  | 33.33% | 0.13% | 1.16E-01 | ASP3-1 EXO1             |
| <a href="#">Zap1p</a>  | 33.33% | 0.13% | 1.19E-01 | RNR3 ASP3-1             |
| <a href="#">Hap2p</a>  | 33.33% | 0.12% | 1.34E-01 | ASP3-1 EXO1             |
| <a href="#">Yrm1p</a>  | 50.00% | 0.12% | 1.35E-01 | AVT2 RNR3 YKR051W       |
| <a href="#">Fkh1p</a>  | 50.00% | 0.11% | 1.39E-01 | AVT2 SRB4 RNR3          |
| <a href="#">Mig3p</a>  | 33.33% | 0.12% | 1.45E-01 | AVT2 RNR3               |
| <a href="#">Mcm1p</a>  | 33.33% | 0.12% | 1.45E-01 | RNR3 ASP3-1             |
| <a href="#">Ixr1p</a>  | 33.33% | 0.12% | 1.58E-01 | AVT2 RNR3               |
| <a href="#">Hsf1p</a>  | 33.33% | 0.12% | 1.60E-01 | AVT2 RNR3               |
| <a href="#">Rox1p</a>  | 16.67% | 0.11% | 1.70E-01 | <a href="#">RNR3</a>    |
| <a href="#">Sko1p</a>  | 16.67% | 0.11% | 1.77E-01 | <a href="#">EXO1</a>    |
| <a href="#">Spt23p</a> | 33.33% | 0.11% | 1.79E-01 | RNR3 YKR051W            |
| <a href="#">Yap6p</a>  | 16.67% | 0.10% | 1.93E-01 | <a href="#">EXO1</a>    |
| <a href="#">Hms1p</a>  | 16.67% | 0.10% | 1.99E-01 | <a href="#">RNR3</a>    |
| <a href="#">Reb1p</a>  | 16.67% | 0.10% | 2.06E-01 | <a href="#">AVT2</a>    |
| <a href="#">Rap1p</a>  | 50.00% | 0.10% | 2.09E-01 | AVT2 RNR3 ASP3-1        |
| <a href="#">Swi4p</a>  | 16.67% | 0.09% | 2.23E-01 | <a href="#">RNR3</a>    |
| <a href="#">Pho2p</a>  | 16.67% | 0.09% | 2.25E-01 | <a href="#">ASP3-1</a>  |
| <a href="#">Ash1p</a>  | 50.00% | 0.09% | 2.50E-01 | RNR3 YKR051W ASP3-1     |
| <a href="#">Pdr3p</a>  | 16.67% | 0.08% | 2.60E-01 | <a href="#">ASP3-1</a>  |
| <a href="#">Gal4p</a>  | 16.67% | 0.08% | 2.72E-01 | <a href="#">RNR3</a>    |
| <a href="#">Tye7p</a>  | 16.67% | 0.08% | 2.80E-01 | <a href="#">YKR051W</a> |
| <a href="#">Sok2p</a>  | 33.33% | 0.09% | 2.87E-01 | RNR3 YKR051W            |
| <a href="#">Yhp1p</a>  | 16.67% | 0.08% | 2.97E-01 | <a href="#">RNR3</a>    |
| <a href="#">Pip2p</a>  | 16.67% | 0.08% | 3.03E-01 | <a href="#">RNR3</a>    |
| <a href="#">Xbp1p</a>  | 16.67% | 0.07% | 3.38E-01 | <a href="#">RNR3</a>    |
| <a href="#">Aft1p</a>  | 16.67% | 0.07% | 3.38E-01 | <a href="#">RNR3</a>    |
| <a href="#">Pdr1p</a>  | 16.67% | 0.07% | 3.49E-01 | <a href="#">AVT2</a>    |
| <a href="#">Ace2p</a>  | 66.67% | 0.08% | 3.57E-01 | AVT2 RNR3 YKR051W EXO1  |
| <a href="#">Arr1p</a>  | 16.67% | 0.06% | 4.05E-01 | <a href="#">RNR3</a>    |
| <a href="#">Gcr1p</a>  | 16.67% | 0.06% | 4.16E-01 | <a href="#">EXO1</a>    |
| <a href="#">Cst6p</a>  | 33.33% | 0.07% | 4.20E-01 | ASP3-1 EXO1             |
| <a href="#">Ste12p</a> | 50.00% | 0.08% | 4.22E-01 | AVT2 RNR3 EXO1          |

|                       |        |       |          |                      |
|-----------------------|--------|-------|----------|----------------------|
| <a href="#">Abf1p</a> | 33.33% | 0.07% | 4.45E-01 | AVT2 YKR051W         |
| <a href="#">Fkh2p</a> | 16.67% | 0.05% | 5.49E-01 | <a href="#">RNR3</a> |
| <a href="#">Sfp1p</a> | 50.00% | 0.07% | 5.61E-01 | RNR3 YKR051W EXO1    |
| <a href="#">Cin5p</a> | 16.67% | 0.05% | 5.92E-01 | <a href="#">AVT2</a> |
| <a href="#">Msn2p</a> | 33.33% | 0.06% | 6.16E-01 | RNR3 ASP3-1          |
| <a href="#">Yap1p</a> | 33.33% | 0.06% | 6.27E-01 | RNR3 ASP3-1          |
| <a href="#">Msn4p</a> | 16.67% | 0.04% | 6.99E-01 | <a href="#">RNR3</a> |
| <a href="#">Tec1p</a> | 33.33% | 0.05% | 7.20E-01 | SRB4 EXO1            |
| <a href="#">Tup1p</a> | 16.67% | 0.04% | 7.23E-01 | <a href="#">RNR3</a> |



Subnetwork 11

| Transcription Factor    | % in user set | % in Yeasttract | p-value  | Target ORF/Genes           |
|-------------------------|---------------|-----------------|----------|----------------------------|
| <a href="#">Crz1p</a>   | 60.00%        | 0.47%           | 2.97E-04 | YCR041W YDR134C TOH1       |
| <a href="#">Aca1p</a>   | 40.00%        | 0.70%           | 5.95E-04 | YCR041W PER33              |
| <a href="#">Cad1p</a>   | 60.00%        | 0.38%           | 7.09E-04 | YDR134C TOH1 VMA11         |
| <a href="#">Hap4p</a>   | 60.00%        | 0.30%           | 1.69E-03 | YCR041W TOH1 VMA11         |
| <a href="#">Gat3p</a>   | 40.00%        | 0.45%           | 2.22E-03 | YCR041W PER33              |
| <a href="#">Cup9p</a>   | 60.00%        | 0.28%           | 2.37E-03 | YCR041W YDR134C PER33      |
| <a href="#">Stb5p</a>   | 60.00%        | 0.26%           | 3.06E-03 | YCR041W YDR134C PER33      |
| <a href="#">Gsm1p</a>   | 20.00%        | 0.59%           | 5.32E-03 | <a href="#">VMA11</a>      |
| <a href="#">Stp4p</a>   | 20.00%        | 0.57%           | 5.76E-03 | <a href="#">VMA11</a>      |
| <a href="#">Dal80p</a>  | 20.00%        | 0.50%           | 7.47E-03 | <a href="#">YCR041W</a>    |
| <a href="#">Cha4p</a>   | 20.00%        | 0.46%           | 8.67E-03 | <a href="#">YCR041W</a>    |
| <a href="#">Arr1p</a>   | 60.00%        | 0.19%           | 1.04E-02 | YCR041W YDR134C PER33      |
| <a href="#">Gcr1p</a>   | 60.00%        | 0.18%           | 1.12E-02 | YDR134C PER33 VMA11        |
| <a href="#">Sef1p</a>   | 20.00%        | 0.40%           | 1.16E-02 | <a href="#">VMA11</a>      |
| <a href="#">Asg1p</a>   | 20.00%        | 0.39%           | 1.21E-02 | <a href="#">VMA11</a>      |
| <a href="#">Mig3p</a>   | 60.00%        | 0.18%           | 1.22E-02 | YDR134C TOH1 PER33         |
| <a href="#">Dal82p</a>  | 40.00%        | 0.25%           | 1.24E-02 | YDR134C VMA11              |
| <a href="#">Rds1p</a>   | 20.00%        | 0.38%           | 1.24E-02 | <a href="#">YCR041W</a>    |
| <a href="#">Adr1p</a>   | 40.00%        | 0.24%           | 1.30E-02 | YDR134C PER33              |
| <a href="#">Gzf3p</a>   | 20.00%        | 0.35%           | 1.51E-02 | <a href="#">YCR041W</a>    |
| <a href="#">Yap5p</a>   | 40.00%        | 0.23%           | 1.52E-02 | YCR041W VMA11              |
| <a href="#">Hap3p</a>   | 20.00%        | 0.33%           | 1.68E-02 | <a href="#">YCR041W</a>    |
| <a href="#">Rim101p</a> | 60.00%        | 0.16%           | 1.81E-02 | YDR134C TOH1 VMA11         |
| <a href="#">Uga3p</a>   | 20.00%        | 0.31%           | 1.82E-02 | <a href="#">YCR041W</a>    |
| <a href="#">Yap3p</a>   | 20.00%        | 0.30%           | 2.00E-02 | <a href="#">YCR041W</a>    |
| <a href="#">Yap6p</a>   | 40.00%        | 0.20%           | 2.06E-02 | YCR041W TOH1               |
| <a href="#">Flo8p</a>   | 40.00%        | 0.20%           | 2.07E-02 | YDR134C PER33              |
| <a href="#">Msn2p</a>   | 80.00%        | 0.12%           | 2.52E-02 | YCR041W YDR134C TOH1 PER33 |
| <a href="#">Gis1p</a>   | 20.00%        | 0.26%           | 2.70E-02 | <a href="#">TOH1</a>       |
| <a href="#">Oaf3p</a>   | 20.00%        | 0.24%           | 3.07E-02 | <a href="#">YDR134C</a>    |
| <a href="#">Hap5p</a>   | 20.00%        | 0.22%           | 3.50E-02 | <a href="#">YCR041W</a>    |
| <a href="#">Mac1p</a>   | 20.00%        | 0.22%           | 3.72E-02 | <a href="#">VMA11</a>      |
| <a href="#">Rgt1p</a>   | 20.00%        | 0.20%           | 4.24E-02 | <a href="#">PER33</a>      |
| <a href="#">Tec1p</a>   | 80.00%        | 0.10%           | 4.39E-02 | YCR041W YDR134C TOH1 VMA11 |
| <a href="#">Pip2p</a>   | 40.00%        | 0.15%           | 4.58E-02 | YCR041W PER33              |
| <a href="#">Ecm22p</a>  | 20.00%        | 0.19%           | 4.77E-02 | <a href="#">PER33</a>      |
| <a href="#">Ndt80p</a>  | 20.00%        | 0.17%           | 5.45E-02 | <a href="#">PER33</a>      |
| <a href="#">Cup2p</a>   | 20.00%        | 0.17%           | 5.58E-02 | <a href="#">VMA11</a>      |
| <a href="#">Pho4p</a>   | 40.00%        | 0.14%           | 5.60E-02 | YDR134C TOH1               |
| <a href="#">Hac1p</a>   | 20.00%        | 0.17%           | 6.03E-02 | <a href="#">YDR134C</a>    |
| <a href="#">Sum1p</a>   | 20.00%        | 0.16%           | 6.32E-02 | <a href="#">PER33</a>      |
| <a href="#">Fkh1p</a>   | 60.00%        | 0.11%           | 6.53E-02 | YCR041W PER33 VMA11        |
| <a href="#">Stp2p</a>   | 20.00%        | 0.16%           | 6.77E-02 | <a href="#">YCR041W</a>    |

|                        |        |       |          |                         |
|------------------------|--------|-------|----------|-------------------------|
| <a href="#">Tup1p</a>  | 60.00% | 0.11% | 6.81E-02 | YDR134C TOH1 PER33      |
| <a href="#">Put3p</a>  | 20.00% | 0.15% | 7.06E-02 | <a href="#">YCR041W</a> |
| <a href="#">Zap1p</a>  | 40.00% | 0.13% | 7.07E-02 | YCR041W TOH1            |
| <a href="#">Ino2p</a>  | 20.00% | 0.15% | 7.10E-02 | <a href="#">TOH1</a>    |
| <a href="#">Haa1p</a>  | 20.00% | 0.15% | 7.25E-02 | <a href="#">YDR134C</a> |
| <a href="#">Cst6p</a>  | 60.00% | 0.11% | 7.46E-02 | YDR134C PER33 VMA11     |
| <a href="#">Mga1p</a>  | 20.00% | 0.14% | 7.95E-02 | <a href="#">YDR134C</a> |
| <a href="#">Rfx1p</a>  | 20.00% | 0.14% | 7.95E-02 | <a href="#">YDR134C</a> |
| <a href="#">Hap2p</a>  | 40.00% | 0.12% | 8.00E-02 | YDR134C VMA11           |
| <a href="#">Rlm1p</a>  | 20.00% | 0.14% | 8.13E-02 | <a href="#">TOH1</a>    |
| <a href="#">Abf1p</a>  | 60.00% | 0.11% | 8.30E-02 | YDR134C TOH1 VMA11      |
| <a href="#">Nrg1p</a>  | 20.00% | 0.14% | 8.36E-02 | <a href="#">YDR134C</a> |
| <a href="#">Phd1p</a>  | 20.00% | 0.13% | 9.20E-02 | <a href="#">YDR134C</a> |
| <a href="#">Hsf1p</a>  | 40.00% | 0.12% | 9.70E-02 | YDR134C PER33           |
| <a href="#">Rap1p</a>  | 60.00% | 0.10% | 1.04E-01 | YDR134C TOH1 VMA11      |
| <a href="#">Spt23p</a> | 40.00% | 0.11% | 1.10E-01 | YDR134C TOH1            |
| <a href="#">Oaf1p</a>  | 20.00% | 0.11% | 1.21E-01 | <a href="#">YDR134C</a> |
| <a href="#">Hms1p</a>  | 20.00% | 0.10% | 1.45E-01 | <a href="#">YCR041W</a> |
| <a href="#">Skn7p</a>  | 20.00% | 0.09% | 1.62E-01 | <a href="#">YCR041W</a> |
| <a href="#">Swi4p</a>  | 20.00% | 0.09% | 1.65E-01 | <a href="#">YDR134C</a> |
| <a href="#">Pho2p</a>  | 20.00% | 0.09% | 1.66E-01 | <a href="#">PER33</a>   |
| <a href="#">Cin5p</a>  | 40.00% | 0.09% | 1.71E-01 | TOH1 VMA11              |
| <a href="#">Mga2p</a>  | 20.00% | 0.09% | 1.75E-01 | <a href="#">YDR134C</a> |
| <a href="#">Sok2p</a>  | 40.00% | 0.09% | 1.85E-01 | YDR134C TOH1            |
| <a href="#">Gal4p</a>  | 20.00% | 0.08% | 2.04E-01 | <a href="#">PER33</a>   |
| <a href="#">Tye7p</a>  | 20.00% | 0.08% | 2.10E-01 | <a href="#">VMA11</a>   |
| <a href="#">Fhl1p</a>  | 20.00% | 0.08% | 2.12E-01 | <a href="#">YDR134C</a> |
| <a href="#">Aft1p</a>  | 20.00% | 0.07% | 2.57E-01 | <a href="#">TOH1</a>    |
| <a href="#">Xbp1p</a>  | 20.00% | 0.07% | 2.57E-01 | <a href="#">TOH1</a>    |
| <a href="#">Pdr1p</a>  | 20.00% | 0.07% | 2.67E-01 | <a href="#">YDR134C</a> |
| <a href="#">Ino4p</a>  | 20.00% | 0.07% | 2.73E-01 | <a href="#">YDR134C</a> |
| <a href="#">Cbf1p</a>  | 20.00% | 0.07% | 2.91E-01 | <a href="#">YDR134C</a> |
| <a href="#">Met4p</a>  | 20.00% | 0.06% | 2.98E-01 | <a href="#">PER33</a>   |
| <a href="#">Mcm1p</a>  | 20.00% | 0.06% | 3.34E-01 | <a href="#">TOH1</a>    |
| <a href="#">Gcn4p</a>  | 40.00% | 0.07% | 3.52E-01 | YCR041W PER33           |
| <a href="#">Bas1p</a>  | 40.00% | 0.07% | 3.54E-01 | TOH1 PER33              |
| <a href="#">Rpn4p</a>  | 20.00% | 0.06% | 3.68E-01 | <a href="#">YDR134C</a> |
| <a href="#">Ash1p</a>  | 40.00% | 0.06% | 4.01E-01 | PER33 VMA11             |
| <a href="#">Fkh2p</a>  | 20.00% | 0.05% | 4.43E-01 | <a href="#">PER33</a>   |
| <a href="#">Yap1p</a>  | 40.00% | 0.06% | 4.71E-01 | YDR134C PER33           |
| <a href="#">Msn4p</a>  | 20.00% | 0.04% | 5.91E-01 | <a href="#">YCR041W</a> |
| <a href="#">Sfp1p</a>  | 40.00% | 0.05% | 6.96E-01 | YDR134C PER33           |
| <a href="#">Ace2p</a>  | 40.00% | 0.04% | 7.95E-01 | YCR041W VMA11           |

Subnetwork 12

| Transcription Factor    | % in user set | % in Yeasttract | p-value  | Target ORF/Genes            |
|-------------------------|---------------|-----------------|----------|-----------------------------|
| <a href="#">Ume6p</a>   | 80.00%        | 0.27%           | 3.72E-04 | YIL015C-A KIN2 RPM2 YMR046C |
| <a href="#">Ixr1p</a>   | 80.00%        | 0.23%           | 8.43E-04 | MIG1 KIN2 RPM2 YMR046C      |
| <a href="#">Mig1p</a>   | 40.00%        | 0.44%           | 2.31E-03 | MIG1 RPM2                   |
| <a href="#">Ert1p</a>   | 20.00%        | 0.44%           | 9.63E-03 | <a href="#">RPM2</a>        |
| <a href="#">Sef1p</a>   | 20.00%        | 0.40%           | 1.16E-02 | <a href="#">KIN2</a>        |
| <a href="#">Mig3p</a>   | 60.00%        | 0.18%           | 1.22E-02 | MIG1 YIL015C-A YMR046C      |
| <a href="#">Bas1p</a>   | 80.00%        | 0.13%           | 1.32E-02 | MIG1 YIL015C-A RPM2 YMR046C |
| <a href="#">Hal9p</a>   | 20.00%        | 0.37%           | 1.35E-02 | <a href="#">RPM2</a>        |
| <a href="#">Yap5p</a>   | 40.00%        | 0.23%           | 1.52E-02 | MIG1 KIN2                   |
| <a href="#">Hap3p</a>   | 20.00%        | 0.33%           | 1.68E-02 | <a href="#">RPM2</a>        |
| <a href="#">Mig2p</a>   | 20.00%        | 0.33%           | 1.69E-02 | <a href="#">MIG1</a>        |
| <a href="#">Ash1p</a>   | 80.00%        | 0.13%           | 1.78E-02 | MIG1 YIL015C-A KIN2 RPM2    |
| <a href="#">Rim101p</a> | 60.00%        | 0.16%           | 1.81E-02 | MIG1 YIL015C-A RPM2         |
| <a href="#">Nrg2p</a>   | 20.00%        | 0.29%           | 2.14E-02 | <a href="#">RPM2</a>        |
| <a href="#">Dal81p</a>  | 20.00%        | 0.27%           | 2.40E-02 | <a href="#">KIN2</a>        |
| <a href="#">Yap1p</a>   | 80.00%        | 0.12%           | 2.67E-02 | MIG1 YIL015C-A RPM2 YMR046C |
| <a href="#">Tos8p</a>   | 20.00%        | 0.25%           | 2.91E-02 | <a href="#">YIL015C-A</a>   |
| <a href="#">Hap5p</a>   | 20.00%        | 0.22%           | 3.50E-02 | <a href="#">RPM2</a>        |
| <a href="#">Rgt1p</a>   | 20.00%        | 0.20%           | 4.24E-02 | <a href="#">MIG1</a>        |
| <a href="#">Yhp1p</a>   | 40.00%        | 0.16%           | 4.40E-02 | RPM2 YMR046C                |
| <a href="#">Pip2p</a>   | 40.00%        | 0.15%           | 4.58E-02 | KIN2 RPM2                   |
| <a href="#">Ste12p</a>  | 80.00%        | 0.10%           | 4.59E-02 | YIL015C-A KIN2 RPM2 YMR046C |
| <a href="#">Gcr2p</a>   | 40.00%        | 0.15%           | 4.65E-02 | MIG1 RPM2                   |
| <a href="#">Ecm22p</a>  | 20.00%        | 0.19%           | 4.77E-02 | <a href="#">YIL015C-A</a>   |
| <a href="#">Met32p</a>  | 20.00%        | 0.18%           | 5.07E-02 | <a href="#">RPM2</a>        |
| <a href="#">Rds2p</a>   | 20.00%        | 0.18%           | 5.28E-02 | <a href="#">RPM2</a>        |
| <a href="#">Ndt80p</a>  | 20.00%        | 0.17%           | 5.45E-02 | <a href="#">YMR046C</a>     |
| <a href="#">Xbp1p</a>   | 40.00%        | 0.14%           | 5.57E-02 | MIG1 YIL015C-A              |
| <a href="#">Aft1p</a>   | 40.00%        | 0.14%           | 5.57E-02 | YIL015C-A RPM2              |
| <a href="#">Cup2p</a>   | 20.00%        | 0.17%           | 5.58E-02 | <a href="#">KIN2</a>        |
| <a href="#">Yox1p</a>   | 40.00%        | 0.14%           | 5.81E-02 | RPM2 YMR046C                |
| <a href="#">Mss11p</a>  | 20.00%        | 0.17%           | 6.06E-02 | <a href="#">KIN2</a>        |
| <a href="#">Yrm1p</a>   | 60.00%        | 0.12%           | 6.30E-02 | MIG1 YIL015C-A RPM2         |
| <a href="#">Crz1p</a>   | 20.00%        | 0.16%           | 6.68E-02 | <a href="#">MIG1</a>        |
| <a href="#">Zap1p</a>   | 40.00%        | 0.13%           | 7.07E-02 | YIL015C-A YMR046C           |
| <a href="#">Leu3p</a>   | 20.00%        | 0.15%           | 7.19E-02 | <a href="#">RPM2</a>        |
| <a href="#">Haa1p</a>   | 20.00%        | 0.15%           | 7.25E-02 | <a href="#">KIN2</a>        |
| <a href="#">Hap2p</a>   | 40.00%        | 0.12%           | 8.00E-02 | KIN2 RPM2                   |
| <a href="#">Nrg1p</a>   | 20.00%        | 0.14%           | 8.36E-02 | <a href="#">RPM2</a>        |
| <a href="#">Rpn4p</a>   | 40.00%        | 0.11%           | 1.04E-01 | MIG1 KIN2                   |
| <a href="#">Rox1p</a>   | 20.00%        | 0.11%           | 1.23E-01 | <a href="#">YIL015C-A</a>   |
| <a href="#">Ace2p</a>   | 80.00%        | 0.08%           | 1.35E-01 | MIG1 YIL015C-A KIN2 RPM2    |
| <a href="#">Yap6p</a>   | 20.00%        | 0.10%           | 1.41E-01 | <a href="#">YIL015C-A</a>   |

|                        |        |       |          |                           |
|------------------------|--------|-------|----------|---------------------------|
| <a href="#">Hap4p</a>  | 20.00% | 0.10% | 1.46E-01 | <a href="#">RPM2</a>      |
| <a href="#">Reb1p</a>  | 20.00% | 0.10% | 1.51E-01 | <a href="#">YMR046C</a>   |
| <a href="#">Skn7p</a>  | 20.00% | 0.09% | 1.62E-01 | <a href="#">RPM2</a>      |
| <a href="#">Msn2p</a>  | 60.00% | 0.09% | 1.62E-01 | YIL015C-A RPM2 YMR046C    |
| <a href="#">Pho2p</a>  | 20.00% | 0.09% | 1.66E-01 | <a href="#">YIL015C-A</a> |
| <a href="#">Tye7p</a>  | 20.00% | 0.08% | 2.10E-01 | <a href="#">YMR046C</a>   |
| <a href="#">Yrr1p</a>  | 20.00% | 0.08% | 2.23E-01 | <a href="#">RPM2</a>      |
| <a href="#">Msn4p</a>  | 40.00% | 0.08% | 2.51E-01 | YIL015C-A YMR046C         |
| <a href="#">Fkh1p</a>  | 40.00% | 0.08% | 2.66E-01 | MIG1 RPM2                 |
| <a href="#">Pdr1p</a>  | 20.00% | 0.07% | 2.67E-01 | <a href="#">RPM2</a>      |
| <a href="#">Tup1p</a>  | 40.00% | 0.08% | 2.72E-01 | RPM2 YMR046C              |
| <a href="#">Ino4p</a>  | 20.00% | 0.07% | 2.73E-01 | <a href="#">MIG1</a>      |
| <a href="#">Met4p</a>  | 20.00% | 0.06% | 2.98E-01 | <a href="#">MIG1</a>      |
| <a href="#">Arr1p</a>  | 20.00% | 0.06% | 3.14E-01 | <a href="#">MIG1</a>      |
| <a href="#">Gcr1p</a>  | 20.00% | 0.06% | 3.23E-01 | <a href="#">YMR046C</a>   |
| <a href="#">Gcn4p</a>  | 40.00% | 0.07% | 3.52E-01 | RPM2 YMR046C              |
| <a href="#">Rap1p</a>  | 40.00% | 0.07% | 3.54E-01 | KIN2 YMR046C              |
| <a href="#">Hsf1p</a>  | 20.00% | 0.06% | 3.54E-01 | <a href="#">YMR046C</a>   |
| <a href="#">Spt23p</a> | 20.00% | 0.05% | 3.80E-01 | <a href="#">YMR046C</a>   |
| <a href="#">Swi5p</a>  | 20.00% | 0.05% | 4.15E-01 | <a href="#">RPM2</a>      |
| <a href="#">Fkh2p</a>  | 20.00% | 0.05% | 4.43E-01 | <a href="#">RPM2</a>      |
| <a href="#">Cin5p</a>  | 20.00% | 0.05% | 4.84E-01 | <a href="#">RPM2</a>      |
| <a href="#">Sok2p</a>  | 20.00% | 0.04% | 5.05E-01 | <a href="#">RPM2</a>      |
| <a href="#">Tec1p</a>  | 40.00% | 0.05% | 5.66E-01 | RPM2 YMR046C              |
| <a href="#">Abf1p</a>  | 20.00% | 0.04% | 6.54E-01 | <a href="#">KIN2</a>      |
| <a href="#">Sfp1p</a>  | 40.00% | 0.05% | 6.96E-01 | MIG1 RPM2                 |
